# Supplementary material for: Long-Lasting Defence Priming by β-Aminobutyric Acid in Tomato Is Marked by Genome-Wide Changes in DNA Methylation
Source: Front Plant Sci. 2022 Apr 15;13:836326. doi: 10.3389/fpls.2022.836326 (PMC9051511; doi:10.3389/fpls.2022.836326)
Supplement: Supplementary file 2 [file Data_Sheet_1.xlsx]

## Sheet: Table S1
Supplementary Table S1. Metrics of WGBS analysis.
Genotype	pair Reads	Final trim	% keep reads	Bismark map efficiency	deduplicated	Plastide conversion	Methylation (adjusted)
							CG	CHG	CHH
CTR1	11357535	7438924	0.654977	0.72	0.7965	0.987989	sample discarded
CTR2	22028833	17277253	0.784302	0.811	0.9065	0.995155	0.831949	0.658792	0.111457
CTR3	26717403	22265307	0.833363	0.827	0.8841	0.993878	0.851753	0.684782	0.129204
BABA1	48413149	42914499	0.886422	0.856	0.9237	0.995189	0.781223	0.582186	0.0726488
BABA2	32313551	28042628	0.867829	0.847	0.9255	0.995865	0.790717	0.596523	0.0806651
BABA3	35122636	31909375	0.908513	0.857	0.9349	0.99462	0.789728	0.589809	0.0716126

## Sheet: Table S2
Supplementary Table S2. Genes with overlapping DMRs in their transcribed region (Gene) or in their promoter.
CG Gain		CG Loss		CHG Gain		CHG Loss		CHH Loss
Gene	Promoter	Gene	Promoter	Gene	Promoter	Gene	Promoter	Gene	Promoter
Solyc00g005907	Solyc00g005900	Solyc00g005480	Solyc00g011170	Solyc00g005907	Solyc00g012435	Solyc00g005480	Solyc00g005900	Solyc00g005890	Solyc00g042840
Solyc00g026160	Solyc00g012440	Solyc00g009110	Solyc00g012430	Solyc00g012435	Solyc00g063110	Solyc00g009110	Solyc00g011170	Solyc00g154480	Solyc00g042850
Solyc00g027770	Solyc00g013186	Solyc00g009145	Solyc00g012435	Solyc00g030000	Solyc00g090660	Solyc00g009145	Solyc00g012430	Solyc00g244305	Solyc00g052540
Solyc00g030000	Solyc00g030000	Solyc00g009146	Solyc00g014170	Solyc00g042858	Solyc00g167800	Solyc00g009146	Solyc00g012440	Solyc01g005150	Solyc00g154480
Solyc00g071180	Solyc00g030100	Solyc00g012430	Solyc00g017760	Solyc06g050455	Solyc00g184350	Solyc00g012430	Solyc00g013186	Solyc01g005480	Solyc00g164580
Solyc06g050455	Solyc00g090660	Solyc00g012435	Solyc00g023050	Solyc00g084650	Solyc00g294233	Solyc00g015737	Solyc00g014170	Solyc01g005830	Solyc00g198360
Solyc00g145170	Solyc00g145170	Solyc00g015737	Solyc00g036320	Solyc00g084750	Solyc01g005300	Solyc00g026160	Solyc00g017760	Solyc01g006310	Solyc01g005010
Solyc00g170510	Solyc00g171710	Solyc00g026160	Solyc00g063110	Solyc00g272810	Solyc01g005660	Solyc00g027770	Solyc00g023050	Solyc01g006540	Solyc01g005070
Solyc00g171710	Solyc00g184350	Solyc00g030000	Solyc00g164580	Solyc01g005030	Solyc01g006320	Solyc00g030000	Solyc00g030000	Solyc01g006565	Solyc01g005330
Solyc00g174330	Solyc00g247300	Solyc00g042858	Solyc00g167800	Solyc01g005610	Solyc01g006590	Solyc00g059505	Solyc00g030100	Solyc01g006680	Solyc01g005390
Solyc00g174340	Solyc00g247305	Solyc00g059505	Solyc00g294233	Solyc01g005680	Solyc01g008415	Solyc00g071180	Solyc00g036320	Solyc01g006720	Solyc01g005480
Solyc00g203660	Solyc01g005080	Solyc00g080750	Solyc00g320430	Solyc01g006320	Solyc01g008550	Solyc00g080750	Solyc00g145170	Solyc01g006870	Solyc01g005490
Solyc00g272810	Solyc01g005300	Solyc00g084650	Solyc01g005420	Solyc01g006390	Solyc01g009060	Solyc00g134620	Solyc00g164580	Solyc01g007895	Solyc01g005670
Solyc01g005030	Solyc01g005340	Solyc00g084750	Solyc01g005540	Solyc01g006460	Solyc01g009510	Solyc00g136565	Solyc00g171710	Solyc01g008060	Solyc01g005830
Solyc01g005090	Solyc01g005420	Solyc00g134620	Solyc01g006250	Solyc01g006590	Solyc01g009540	Solyc00g143777	Solyc00g247300	Solyc01g008240	Solyc01g006010
Solyc01g005100	Solyc01g005450	Solyc00g136565	Solyc01g006320	Solyc01g006760	Solyc01g009630	Solyc00g145170	Solyc00g247305	Solyc01g008250	Solyc01g006130
Solyc01g005310	Solyc01g005660	Solyc00g143777	Solyc01g006360	Solyc01g006930	Solyc01g011095	Solyc00g170510	Solyc00g320430	Solyc01g008420	Solyc01g006150
Solyc01g005420	Solyc01g005665	Solyc00g244305	Solyc01g006920	Solyc01g007140	Solyc01g011350	Solyc00g171710	Solyc01g005080	Solyc01g008590	Solyc01g006250
Solyc01g005460	Solyc01g005790	Solyc00g247305	Solyc01g007760	Solyc01g008570	Solyc01g012690	Solyc00g174330	Solyc01g005340	Solyc01g008610	Solyc01g006430
Solyc01g005480	Solyc01g005810	Solyc01g005420	Solyc01g007780	Solyc01g008830	Solyc01g014370	Solyc00g174340	Solyc01g005420	Solyc01g008650	Solyc01g006470
Solyc01g005610	Solyc01g005860	Solyc01g005650	Solyc01g008710	Solyc01g008890	Solyc01g014470	Solyc00g203660	Solyc01g005450	Solyc01g008740	Solyc01g006480
Solyc01g005660	Solyc01g005910	Solyc01g005680	Solyc01g009060	Solyc01g009060	Solyc01g014700	Solyc00g244305	Solyc01g005540	Solyc01g008830	Solyc01g006500
Solyc01g005680	Solyc01g005920	Solyc01g006250	Solyc01g009630	Solyc01g009510	Solyc01g014705	Solyc00g247305	Solyc01g005665	Solyc01g008977	Solyc01g006510
Solyc01g005810	Solyc01g006130	Solyc01g006320	Solyc01g009715	Solyc01g009530	Solyc01g015290	Solyc01g005090	Solyc01g005790	Solyc01g009430	Solyc01g006630
Solyc01g005860	Solyc01g006320	Solyc01g006360	Solyc01g009970	Solyc01g009620	Solyc01g016960	Solyc01g005100	Solyc01g005810	Solyc01g009520	Solyc01g006680
Solyc01g006200	Solyc01g006520	Solyc01g006540	Solyc01g010393	Solyc01g009630	Solyc01g017210	Solyc01g005310	Solyc01g005860	Solyc01g009550	Solyc01g006825
Solyc01g006210	Solyc01g006580	Solyc01g006970	Solyc01g010590	Solyc01g009660	Solyc01g017380	Solyc01g005420	Solyc01g005910	Solyc01g009715	Solyc01g006860
Solyc01g006360	Solyc01g006590	Solyc01g007780	Solyc01g010835	Solyc01g009680	Solyc01g020570	Solyc01g005460	Solyc01g005920	Solyc01g010150	Solyc01g006980
Solyc01g006390	Solyc01g006800	Solyc01g007955	Solyc01g010880	Solyc01g009690	Solyc01g034060	Solyc01g005480	Solyc01g006130	Solyc01g010170	Solyc01g007260
Solyc01g006460	Solyc01g006940	Solyc01g008240	Solyc01g011050	Solyc01g009850	Solyc01g044550	Solyc01g005650	Solyc01g006250	Solyc01g010720	Solyc01g007740
Solyc01g006590	Solyc01g007810	Solyc01g008430	Solyc01g011095	Solyc01g009845	Solyc01g056430	Solyc01g005660	Solyc01g006320	Solyc01g010770	Solyc01g007850
Solyc01g006760	Solyc01g007895	Solyc01g008720	Solyc01g014700	Solyc01g010502	Solyc01g058675	Solyc01g005680	Solyc01g006360	Solyc01g010890	Solyc01g007860
Solyc01g006930	Solyc01g008005	Solyc01g008830	Solyc01g015290	Solyc01g010930	Solyc01g066020	Solyc01g005810	Solyc01g006520	Solyc01g012700	Solyc01g007870
Solyc01g006970	Solyc01g008120	Solyc01g009060	Solyc01g016470	Solyc01g011510	Solyc01g068350	Solyc01g005860	Solyc01g006580	Solyc01g016540	Solyc01g007900
Solyc01g007080	Solyc01g008415	Solyc01g009380	Solyc01g016720	Solyc01g014075	Solyc01g079240	Solyc01g006200	Solyc01g006800	Solyc01g018020	Solyc01g007910
Solyc01g007090	Solyc01g008550	Solyc01g009390	Solyc01g017170	Solyc01g014143	Solyc01g079650	Solyc01g006210	Solyc01g006920	Solyc01g044350	Solyc01g007990
Solyc01g007140	Solyc01g008580	Solyc01g009430	Solyc01g017180	Solyc01g014320	Solyc01g079750	Solyc01g006250	Solyc01g006940	Solyc01g056725	Solyc01g008070
Solyc01g008415	Solyc01g008920	Solyc01g009680	Solyc01g017210	Solyc01g017020	Solyc01g079840	Solyc01g006360	Solyc01g007760	Solyc01g057465	Solyc01g008240
Solyc01g008440	Solyc01g009440	Solyc01g009690	Solyc01g017220	Solyc01g017210	Solyc01g080440	Solyc01g006540	Solyc01g007780	Solyc01g058670	Solyc01g008250
Solyc01g008570	Solyc01g009510	Solyc01g009715	Solyc01g017235	Solyc01g017370	Solyc01g081173	Solyc01g006970	Solyc01g007810	Solyc01g059853	Solyc01g008520
Solyc01g008830	Solyc01g009540	Solyc01g009720	Solyc01g017240	Solyc01g017775	Solyc01g081180	Solyc01g007080	Solyc01g007895	Solyc01g059990	Solyc01g008550
Solyc01g008850	Solyc01g009580	Solyc01g009850	Solyc01g017260	Solyc01g017790	Solyc01g081510	Solyc01g007090	Solyc01g008005	Solyc01g060020	Solyc01g008570
Solyc01g008890	Solyc01g009740	Solyc01g009845	Solyc01g017270	Solyc01g020525	Solyc01g090750	Solyc01g007780	Solyc01g008120	Solyc01g065690	Solyc01g008600
Solyc01g008925	Solyc01g009920	Solyc01g010080	Solyc01g017337	Solyc01g020570	Solyc01g091640	Solyc01g007955	Solyc01g008580	Solyc01g065820	Solyc01g008610
Solyc01g008990	Solyc01g010502	Solyc01g010150	Solyc01g017380	Solyc01g044550	Solyc01g094630	Solyc01g008240	Solyc01g008710	Solyc01g065980	Solyc01g008720
Solyc01g009400	Solyc01g010640	Solyc01g010170	Solyc01g017485	Solyc01g044565	Solyc01g095210	Solyc01g008415	Solyc01g008920	Solyc01g067080	Solyc01g008920
Solyc01g009430	Solyc01g010760	Solyc01g010390	Solyc01g017510	Solyc01g049960	Solyc01g096185	Solyc01g008430	Solyc01g009440	Solyc01g067300	Solyc01g009245
Solyc01g009440	Solyc01g010780	Solyc01g010930	Solyc01g017620	Solyc01g056520	Solyc01g097140	Solyc01g008440	Solyc01g009580	Solyc01g068080	Solyc01g009520
Solyc01g009510	Solyc01g011350	Solyc01g010950	Solyc01g020170	Solyc01g056620	Solyc01g097210	Solyc01g008720	Solyc01g009715	Solyc01g068590	Solyc01g009550
Solyc01g009530	Solyc01g011430	Solyc01g011091	Solyc01g020220	Solyc01g056730	Solyc01g098430	Solyc01g008830	Solyc01g009740	Solyc01g079410	Solyc01g009850
Solyc01g009620	Solyc01g012690	Solyc01g011092	Solyc01g020230	Solyc01g056810	Solyc01g099570	Solyc01g008850	Solyc01g009920	Solyc01g079840	Solyc01g009845
Solyc01g009630	Solyc01g014370	Solyc01g011097	Solyc01g020240	Solyc01g056915	Solyc01g099820	Solyc01g008925	Solyc01g009970	Solyc01g079950	Solyc01g009990
Solyc01g009660	Solyc01g014470	Solyc01g012670	Solyc01g020402	Solyc01g056990	Solyc01g100455	Solyc01g008990	Solyc01g010393	Solyc01g080690	Solyc01g010000
Solyc01g009740	Solyc01g014705	Solyc01g014534	Solyc01g020510	Solyc01g057900	Solyc01g102570	Solyc01g009380	Solyc01g010502	Solyc01g081110	Solyc01g010150
Solyc01g009810	Solyc01g015280	Solyc01g016350	Solyc01g020570	Solyc01g058210	Solyc01g103800	Solyc01g009390	Solyc01g010590	Solyc01g081260	Solyc01g010180
Solyc01g009820	Solyc01g016960	Solyc01g016805	Solyc01g021690	Solyc01g058740	Solyc01g105100	Solyc01g009400	Solyc01g010640	Solyc01g073670	Solyc01g010310
Solyc01g010270	Solyc01g017060	Solyc01g016900	Solyc01g034060	Solyc01g060080	Solyc01g105870	Solyc01g009430	Solyc01g010760	Solyc01g074030	Solyc01g010430
Solyc01g010502	Solyc01g017080	Solyc01g017020	Solyc01g034150	Solyc01g066830	Solyc01g106910	Solyc01g009440	Solyc01g010780	Solyc01g074040	Solyc01g010650
Solyc01g011350	Solyc01g017083	Solyc01g017180	Solyc01g028830	Solyc01g067530	Solyc01g107961	Solyc01g009630	Solyc01g010835	Solyc01g086745	Solyc01g010710
Solyc01g011430	Solyc01g017160	Solyc01g017190	Solyc01g044550	Solyc01g068540	Solyc01g109560	Solyc01g009660	Solyc01g010880	Solyc01g086895	Solyc01g010760
Solyc01g011460	Solyc01g017235	Solyc01g017210	Solyc01g056430	Solyc01g079590	Solyc01g110385	Solyc01g009715	Solyc01g011050	Solyc01g086930	Solyc01g010780
Solyc01g011510	Solyc01g017260	Solyc01g017230	Solyc01g057380	Solyc01g080450	Solyc02g014360	Solyc01g009720	Solyc01g011350	Solyc01g087490	Solyc01g010835
Solyc01g012750	Solyc01g017330	Solyc01g017240	Solyc01g058250	Solyc01g080725	Solyc02g014640	Solyc01g009740	Solyc01g011430	Solyc01g087530	Solyc01g010970
Solyc01g014075	Solyc01g017440	Solyc01g017245	Solyc01g058420	Solyc01g081180	Solyc02g021660	Solyc01g009810	Solyc01g015280	Solyc01g087720	Solyc01g011340
Solyc01g014143	Solyc01g017450	Solyc01g017260	Solyc01g060318	Solyc01g073890	Solyc02g027080	Solyc01g009820	Solyc01g016470	Solyc01g087890	Solyc01g011510
Solyc01g014230	Solyc01g017470	Solyc01g017270	Solyc01g065690	Solyc01g087170	Solyc02g030120	Solyc01g009850	Solyc01g016720	Solyc01g088200	Solyc01g014480
Solyc01g014320	Solyc01g017620	Solyc01g017280	Solyc01g066790	Solyc01g087720	Solyc02g031790	Solyc01g009845	Solyc01g017060	Solyc01g088340	Solyc01g015020
Solyc01g017060	Solyc01g020200	Solyc01g017370	Solyc01g066830	Solyc01g087970	Solyc02g032320	Solyc01g010080	Solyc01g017080	Solyc01g088400	Solyc01g017610
Solyc01g017080	Solyc01g021690	Solyc01g017790	Solyc01g067025	Solyc01g088400	Solyc02g032490	Solyc01g010150	Solyc01g017083	Solyc01g088630	Solyc01g020401
Solyc01g017170	Solyc01g034060	Solyc01g017823	Solyc01g067510	Solyc01g090860	Solyc02g032620	Solyc01g010170	Solyc01g017160	Solyc01g089960	Solyc01g020520
Solyc01g017235	Solyc01g057190	Solyc01g020230	Solyc01g067860	Solyc01g091320	Solyc02g032670	Solyc01g010270	Solyc01g017170	Solyc01g090020	Solyc01g020525
Solyc01g017260	Solyc01g057773	Solyc01g020510	Solyc01g068170	Solyc01g094380	Solyc02g037540	Solyc01g010390	Solyc01g017180	Solyc01g090140	Solyc01g049685
Solyc01g017300	Solyc01g057840	Solyc01g020525	Solyc01g068420	Solyc01g095210	Solyc00g007320	Solyc01g010930	Solyc01g017220	Solyc01g090890	Solyc01g049690
Solyc01g017330	Solyc01g058190	Solyc01g020570	Solyc01g068480	Solyc01g095220	Solyc02g061870	Solyc01g010950	Solyc01g017235	Solyc01g091010	Solyc01g049910
Solyc01g017460	Solyc01g058675	Solyc01g021600	Solyc01g079240	Solyc01g097190	Solyc02g063060	Solyc01g011091	Solyc01g017240	Solyc01g091050	Solyc01g049914
Solyc01g017775	Solyc01g066020	Solyc01g021640	Solyc01g079400	Solyc01g100450	Solyc02g063255	Solyc01g011092	Solyc01g017260	Solyc01g091290	Solyc01g050070
Solyc01g020200	Solyc01g067860	Solyc01g022760	Solyc01g079420	Solyc01g103310	Solyc02g064910	Solyc01g011097	Solyc01g017270	Solyc01g091500	Solyc01g057440
Solyc01g020520	Solyc01g068170	Solyc01g034063	Solyc01g079750	Solyc01g103803	Solyc02g065490	Solyc01g011350	Solyc01g017330	Solyc01g091690	Solyc01g058660
Solyc01g020525	Solyc01g068350	Solyc01g028830	Solyc01g080250	Solyc01g104000	Solyc02g065540	Solyc01g011430	Solyc01g017337	Solyc01g094000	Solyc01g058670
Solyc01g034060	Solyc01g079270	Solyc01g044350	Solyc01g080440	Solyc01g104015	Solyc02g065620	Solyc01g011460	Solyc01g017440	Solyc01g094230	Solyc01g058735
Solyc01g034150	Solyc01g079650	Solyc01g044550	Solyc01g080690	Solyc01g104436	Solyc02g068830	Solyc01g012670	Solyc01g017450	Solyc01g094237	Solyc01g059830
Solyc01g028987	Solyc01g079700	Solyc01g044565	Solyc01g080700	Solyc01g105800	Solyc02g069220	Solyc01g012750	Solyc01g017470	Solyc01g094260	Solyc01g059870
Solyc01g028930	Solyc01g079840	Solyc01g049895	Solyc01g081010	Solyc01g105870	Solyc02g069230	Solyc01g014230	Solyc01g017485	Solyc01g094270	Solyc01g060170
Solyc01g044490	Solyc01g080460	Solyc01g049960	Solyc01g081020	Solyc01g106580	Solyc02g069920	Solyc01g014534	Solyc01g017510	Solyc01g094320	Solyc01g065530
Solyc01g044480	Solyc01g081210	Solyc01g056455	Solyc01g081173	Solyc01g106910	Solyc02g070330	Solyc01g016350	Solyc01g017620	Solyc01g094315	Solyc01g065550
Solyc01g044520	Solyc01g081545	Solyc01g056520	Solyc01g081180	Solyc01g107960	Solyc02g070850	Solyc01g016805	Solyc01g020170	Solyc01g094460	Solyc01g065690
Solyc01g056520	Solyc01g073710	Solyc01g056620	Solyc01g081260	Solyc01g108975	Solyc02g072090	Solyc01g016900	Solyc01g020200	Solyc01g094530	Solyc01g065740
Solyc01g056620	Solyc01g086925	Solyc01g056625	Solyc01g081510	Solyc01g108977	Solyc02g077410	Solyc01g017060	Solyc01g020220	Solyc01g094670	Solyc01g065820
Solyc01g056730	Solyc01g088300	Solyc01g056810	Solyc01g081640	Solyc01g109560	Solyc02g078210	Solyc01g017080	Solyc01g020230	Solyc01g096050	Solyc01g066430
Solyc01g056810	Solyc01g088310	Solyc01g056885	Solyc01g086650	Solyc01g109570	Solyc02g081190	Solyc01g017170	Solyc01g020240	Solyc01g096710	Solyc01g066440
Solyc01g056915	Solyc01g088540	Solyc01g056990	Solyc01g086800	Solyc01g110340	Solyc02g081400	Solyc01g017180	Solyc01g020402	Solyc01g096980	Solyc01g066500
Solyc01g057770	Solyc01g090600	Solyc01g057090	Solyc01g086890	Solyc01g110590	Solyc02g081410	Solyc01g017190	Solyc01g020510	Solyc01g097190	Solyc01g066610
Solyc01g057840	Solyc01g091455	Solyc01g057380	Solyc01g086897	Solyc02g050180	Solyc02g082215	Solyc01g017230	Solyc01g021690	Solyc01g097270	Solyc01g066840
Solyc01g057850	Solyc01g091460	Solyc01g057680	Solyc01g087000	Solyc02g014250	Solyc02g082220	Solyc01g017235	Solyc01g034060	Solyc01g097390	Solyc01g067010
Solyc01g058140	Solyc01g091850	Solyc01g057900	Solyc01g087130	Solyc02g020980	Solyc02g082690	Solyc01g017240	Solyc01g034150	Solyc01g097510	Solyc01g067080
Solyc01g058190	Solyc01g094240	Solyc01g058410	Solyc01g087210	Solyc02g021160	Solyc02g082900	Solyc01g017245	Solyc01g028830	Solyc01g097790	Solyc01g067107
Solyc01g058210	Solyc01g094237	Solyc01g058450	Solyc01g087510	Solyc02g021650	Solyc02g084940	Solyc01g017260	Solyc01g057190	Solyc01g097960	Solyc01g067380
Solyc01g058740	Solyc01g095070	Solyc01g058720	Solyc01g087565	Solyc02g021760	Solyc02g085800	Solyc01g017270	Solyc01g057380	Solyc01g098610	Solyc01g067480
Solyc01g060080	Solyc01g095120	Solyc01g060080	Solyc01g088300	Solyc02g030120	Solyc02g088180	Solyc01g017280	Solyc01g057773	Solyc01g098710	Solyc01g067490
Solyc01g060312	Solyc01g095210	Solyc01g065980	Solyc01g088310	Solyc02g030210	Solyc02g088890	Solyc01g017300	Solyc01g057840	Solyc01g098760	Solyc01g067510
Solyc01g065720	Solyc01g095780	Solyc01g066830	Solyc01g090600	Solyc02g030215	Solyc02g089520	Solyc01g017330	Solyc01g058190	Solyc01g099030	Solyc01g067640
Solyc01g067300	Solyc01g096060	Solyc01g067490	Solyc01g090740	Solyc02g030220	Solyc02g090800	Solyc01g017460	Solyc01g058250	Solyc01g100010	Solyc01g067730
Solyc01g067560	Solyc01g096185	Solyc01g067530	Solyc01g090750	Solyc02g032060	Solyc02g091070	Solyc01g017823	Solyc01g058420	Solyc01g100350	Solyc01g067890
Solyc01g079330	Solyc01g096650	Solyc01g067800	Solyc01g091480	Solyc02g032173	Solyc02g091460	Solyc01g020200	Solyc01g060318	Solyc01g100600	Solyc01g067900
Solyc01g079410	Solyc01g097140	Solyc01g068267	Solyc01g091580	Solyc02g032553	Solyc02g093935	Solyc01g020230	Solyc01g065690	Solyc01g100690	Solyc01g068580
Solyc01g079560	Solyc01g097770	Solyc01g068290	Solyc01g091640	Solyc02g032600	Solyc03g005150	Solyc01g020510	Solyc01g066790	Solyc01g102480	Solyc01g068630
Solyc01g079570	Solyc01g098150	Solyc01g068380	Solyc01g091655	Solyc02g032930	Solyc03g005860	Solyc01g020520	Solyc01g066830	Solyc01g103390	Solyc01g079080
Solyc01g080080	Solyc01g098710	Solyc01g068440	Solyc01g091890	Solyc02g037510	Solyc03g006110	Solyc01g020525	Solyc01g067025	Solyc01g103850	Solyc01g079320
Solyc01g080110	Solyc01g099220	Solyc01g068480	Solyc01g091900	Solyc00g007320	Solyc03g006385	Solyc01g021600	Solyc01g067510	Solyc01g103950	Solyc01g079340
Solyc01g080230	Solyc01g099385	Solyc01g068540	Solyc01g094160	Solyc02g062110	Solyc03g006390	Solyc01g021640	Solyc01g067860	Solyc01g104000	Solyc01g079375
Solyc01g073650	Solyc01g099570	Solyc01g079350	Solyc01g094230	Solyc02g063360	Solyc03g032000	Solyc01g022760	Solyc01g068170	Solyc01g104185	Solyc01g079420
Solyc01g073890	Solyc01g099620	Solyc01g079410	Solyc01g094300	Solyc02g064900	Solyc03g033280	Solyc01g034060	Solyc01g068420	Solyc01g104260	Solyc01g079590
Solyc01g074020	Solyc01g099790	Solyc01g079590	Solyc01g094310	Solyc02g065180	Solyc03g033330	Solyc01g034063	Solyc01g068480	Solyc01g104270	Solyc01g079740
Solyc01g086930	Solyc01g099820	Solyc01g079720	Solyc01g094520	Solyc02g065600	Solyc03g033500	Solyc01g034150	Solyc01g079270	Solyc01g104300	Solyc01g079830
Solyc01g087140	Solyc01g100095	Solyc01g080110	Solyc01g094560	Solyc02g065720	Solyc03g034170	Solyc01g028987	Solyc01g079400	Solyc01g105150	Solyc01g079840
Solyc01g087190	Solyc01g100240	Solyc01g080200	Solyc01g094570	Solyc02g067105	Solyc03g042524	Solyc01g028930	Solyc01g079420	Solyc01g105350	Solyc01g079900
Solyc01g087720	Solyc01g100455	Solyc01g080270	Solyc01g094630	Solyc02g068130	Solyc03g043715	Solyc01g028830	Solyc01g079700	Solyc01g105355	Solyc01g079940
Solyc01g087970	Solyc01g100470	Solyc01g080450	Solyc01g094680	Solyc02g069010	Solyc03g043720	Solyc01g044350	Solyc01g080250	Solyc01g105600	Solyc01g080360
Solyc01g088540	Solyc01g101035	Solyc01g080725	Solyc01g094780	Solyc02g070490	Solyc03g043790	Solyc01g044490	Solyc01g080460	Solyc01g105710	Solyc01g080460
Solyc01g090500	Solyc01g101080	Solyc01g081030	Solyc01g094890	Solyc02g070845	Solyc03g044028	Solyc01g044480	Solyc01g080690	Solyc01g106010	Solyc01g080530
Solyc01g090610	Solyc01g101220	Solyc01g081180	Solyc01g094940	Solyc02g071610	Solyc03g044160	Solyc01g044520	Solyc01g080700	Solyc01g106200	Solyc01g080620
Solyc01g091770	Solyc01g102480	Solyc01g081260	Solyc01g095040	Solyc02g077645	Solyc03g045035	Solyc01g049895	Solyc01g081010	Solyc01g107250	Solyc01g080760
Solyc01g094030	Solyc01g102570	Solyc01g086895	Solyc01g095200	Solyc02g078010	Solyc03g046547	Solyc01g056455	Solyc01g081020	Solyc01g107280	Solyc01g080790
Solyc01g094230	Solyc01g102720	Solyc01g087000	Solyc01g095460	Solyc02g078160	Solyc03g058310	Solyc01g056520	Solyc01g081210	Solyc01g107520	Solyc01g081000
Solyc01g094350	Solyc01g102940	Solyc01g087130	Solyc01g096260	Solyc02g079000	Solyc03g058320	Solyc01g056625	Solyc01g081260	Solyc01g107550	Solyc01g081100
Solyc01g094380	Solyc01g103250	Solyc01g087170	Solyc01g096330	Solyc02g080730	Solyc03g058365	Solyc01g056810	Solyc01g081545	Solyc01g108460	Solyc01g081173
Solyc01g095120	Solyc01g103290	Solyc01g087300	Solyc01g097210	Solyc02g080740	Solyc03g058420	Solyc01g056885	Solyc01g081640	Solyc01g108680	Solyc01g081180
Solyc01g095210	Solyc01g103295	Solyc01g087320	Solyc01g097430	Solyc02g086400	Solyc03g061580	Solyc01g056990	Solyc01g073710	Solyc01g108810	Solyc01g081300
Solyc01g095220	Solyc01g103800	Solyc01g087565	Solyc01g097660	Solyc02g086870	Solyc03g062905	Solyc01g057090	Solyc01g086650	Solyc01g109110	Solyc01g081410
Solyc01g096050	Solyc01g104060	Solyc01g088080	Solyc01g097790	Solyc02g086920	Solyc03g062910	Solyc01g057380	Solyc01g086800	Solyc01g109170	Solyc01g073640
Solyc01g096660	Solyc01g104270	Solyc01g088400	Solyc01g097780	Solyc02g088890	Solyc03g063053	Solyc01g057680	Solyc01g086890	Solyc01g109600	Solyc01g073660
Solyc01g096780	Solyc01g104434	Solyc01g090250	Solyc01g097950	Solyc02g089075	Solyc03g063060	Solyc01g057770	Solyc01g086897	Solyc01g110340	Solyc01g073770
Solyc01g096790	Solyc01g104670	Solyc01g090500	Solyc01g098090	Solyc02g089520	Solyc03g064047	Solyc01g057840	Solyc01g086925	Solyc01g110590	Solyc01g073820
Solyc01g097190	Solyc01g104840	Solyc01g090600	Solyc01g098160	Solyc02g089515	Solyc03g065190	Solyc01g057850	Solyc01g087000	Solyc01g110610	Solyc01g073920
Solyc01g097630	Solyc01g104890	Solyc01g090860	Solyc01g098320	Solyc02g090500	Solyc03g013460	Solyc01g057900	Solyc01g087130	Solyc01g110735	Solyc01g073930
Solyc01g098160	Solyc01g104970	Solyc01g091010	Solyc01g098430	Solyc02g090505	Solyc03g083000	Solyc01g058140	Solyc01g087210	Solyc01g111080	Solyc01g073950
Solyc01g098710	Solyc01g105740	Solyc01g091320	Solyc01g098600	Solyc02g092830	Solyc03g083005	Solyc01g058190	Solyc01g087510	Solyc01g111070	Solyc01g086710
Solyc01g099640	Solyc01g105870	Solyc01g092950	Solyc01g099620	Solyc02g093300	Solyc03g083160	Solyc01g058410	Solyc01g087565	Solyc01g111330	Solyc01g086750
Solyc01g099645	Solyc01g106910	Solyc01g094090	Solyc01g100190	Solyc02g093770	Solyc03g083170	Solyc01g058450	Solyc01g088300	Solyc01g111710	Solyc01g086890
Solyc01g099810	Solyc01g106943	Solyc01g094160	Solyc01g100455	Solyc02g094751	Solyc03g083500	Solyc01g058720	Solyc01g088310	Solyc01g111750	Solyc01g086925
Solyc01g100450	Solyc01g107961	Solyc01g094230	Solyc01g100570	Solyc03g005150	Solyc03g093720	Solyc01g060080	Solyc01g088540	Solyc01g111840	Solyc01g086960
Solyc01g101035	Solyc01g107990	Solyc01g094237	Solyc01g100690	Solyc03g005170	Solyc03g093730	Solyc01g060312	Solyc01g090600	Solyc02g055530	Solyc01g087095
Solyc01g102480	Solyc01g108160	Solyc01g094270	Solyc01g102510	Solyc03g005830	Solyc03g096135	Solyc01g065720	Solyc01g090740	Solyc02g050287	Solyc01g087170
Solyc01g102730	Solyc01g108530	Solyc01g094380	Solyc01g103510	Solyc03g006020	Solyc03g096140	Solyc01g065980	Solyc01g091455	Solyc02g005180	Solyc01g087210
Solyc01g103310	Solyc01g108720	Solyc01g094750	Solyc01g104040	Solyc03g006140	Solyc03g097010	Solyc01g067300	Solyc01g091460	Solyc02g014490	Solyc01g087230
Solyc01g103630	Solyc01g108780	Solyc01g094960	Solyc01g105100	Solyc03g006210	Solyc03g097820	Solyc01g067490	Solyc01g091480	Solyc02g014830	Solyc01g087235
Solyc01g103960	Solyc01g108870	Solyc01g097190	Solyc01g106105	Solyc03g006770	Solyc03g097900	Solyc01g067560	Solyc01g091580	Solyc02g021640	Solyc01g087260
Solyc01g104000	Solyc01g109170	Solyc01g097555	Solyc01g107660	Solyc03g006830	Solyc03g098280	Solyc01g067800	Solyc01g091655	Solyc02g030100	Solyc01g087270
Solyc01g104015	Solyc01g109290	Solyc01g097790	Solyc01g110060	Solyc03g007110	Solyc03g019850	Solyc01g068267	Solyc01g091850	Solyc02g030480	Solyc01g087336
Solyc01g104260	Solyc01g109500	Solyc01g097960	Solyc01g110385	Solyc03g007660	Solyc03g111475	Solyc01g068290	Solyc01g091890	Solyc02g032660	Solyc01g087350
Solyc01g104437	Solyc01g109560	Solyc01g098310	Solyc01g112010	Solyc03g025980	Solyc03g112030	Solyc01g068380	Solyc01g091900	Solyc02g032820	Solyc01g087338
Solyc01g104438	Solyc01g109660	Solyc01g098320	Solyc01g112245	Solyc03g026250	Solyc03g112740	Solyc01g068440	Solyc01g094160	Solyc02g061780	Solyc01g087520
Solyc01g104444	Solyc01g109655	Solyc01g098610	Solyc01g112340	Solyc03g032110	Solyc03g114420	Solyc01g068480	Solyc01g094230	Solyc02g061840	Solyc01g087530
Solyc01g104446	Solyc01g109670	Solyc01g098760	Solyc02g005115	Solyc03g032120	Solyc03g115160	Solyc01g079330	Solyc01g094240	Solyc02g062250	Solyc01g087560
Solyc01g104770	Solyc01g109940	Solyc01g099030	Solyc02g010620	Solyc03g033280	Solyc03g115380	Solyc01g079350	Solyc01g094237	Solyc02g062540	Solyc01g087580
Solyc01g104890	Solyc01g111130	Solyc01g099530	Solyc02g011820	Solyc03g033810	Solyc03g117980	Solyc01g079410	Solyc01g094300	Solyc02g063180	Solyc01g087600
Solyc01g105520	Solyc01g111140	Solyc01g099690	Solyc02g011830	Solyc03g034000	Solyc03g118390	Solyc01g079560	Solyc01g094310	Solyc02g063185	Solyc01g087640
Solyc01g105740	Solyc01g111380	Solyc01g100450	Solyc02g014640	Solyc03g034010	Solyc03g118890	Solyc01g079570	Solyc01g094520	Solyc02g063360	Solyc01g087880
Solyc01g105820	Solyc01g112090	Solyc01g100690	Solyc02g021366	Solyc03g034165	Solyc04g005750	Solyc01g079590	Solyc01g094560	Solyc02g063410	Solyc01g088090
Solyc01g105870	Solyc01g112330	Solyc01g100720	Solyc02g021368	Solyc03g036460	Solyc04g007520	Solyc01g079720	Solyc01g094570	Solyc02g063420	Solyc01g088150
Solyc01g106910	Solyc02g055465	Solyc01g101170	Solyc02g021400	Solyc03g043577	Solyc04g008150	Solyc01g080080	Solyc01g094680	Solyc02g064570	Solyc01g088180
Solyc01g106950	Solyc02g055370	Solyc01g102400	Solyc02g023970	Solyc03g043715	Solyc04g008200	Solyc01g080110	Solyc01g094780	Solyc02g064730	Solyc01g088327
Solyc01g106980	Solyc02g011940	Solyc01g103803	Solyc02g027080	Solyc03g043790	Solyc04g009475	Solyc01g080200	Solyc01g094890	Solyc02g065020	Solyc01g088350
Solyc01g107280	Solyc02g011950	Solyc01g104000	Solyc02g030120	Solyc03g043940	Solyc04g011500	Solyc01g080230	Solyc01g094940	Solyc02g065060	Solyc01g088450
Solyc01g107960	Solyc02g012010	Solyc01g104436	Solyc02g032490	Solyc03g044028	Solyc04g011767	Solyc01g080270	Solyc01g095040	Solyc02g065280	Solyc01g088590
Solyc01g108720	Solyc02g014360	Solyc01g104490	Solyc02g032670	Solyc03g044160	Solyc04g015200	Solyc01g081030	Solyc01g095070	Solyc02g065590	Solyc01g088600
Solyc01g108870	Solyc02g014470	Solyc01g105570	Solyc02g033050	Solyc03g044370	Solyc04g015290	Solyc01g081260	Solyc01g095120	Solyc02g065730	Solyc01g088640
Solyc01g108975	Solyc02g014780	Solyc01g105600	Solyc02g036360	Solyc03g044410	Solyc04g018110	Solyc01g073650	Solyc01g095200	Solyc02g067320	Solyc01g089907
Solyc01g108977	Solyc02g014790	Solyc01g105800	Solyc02g036470	Solyc03g044440	Solyc04g040120	Solyc01g073890	Solyc01g095460	Solyc02g067920	Solyc01g089940
Solyc01g109160	Solyc02g014800	Solyc01g106420	Solyc02g038720	Solyc03g044840	Solyc04g039890	Solyc01g074020	Solyc01g095780	Solyc02g067925	Solyc01g089970
Solyc01g109170	Solyc02g021160	Solyc01g106440	Solyc00g007270	Solyc03g045035	Solyc04g026271	Solyc01g086895	Solyc01g096060	Solyc02g069540	Solyc01g090020
Solyc01g109540	Solyc02g021660	Solyc01g106450	Solyc00g007110	Solyc03g046260	Solyc04g025997	Solyc01g086930	Solyc01g096260	Solyc02g070330	Solyc01g090030
Solyc01g109530	Solyc02g030120	Solyc01g106580	Solyc00g007100	Solyc03g046340	Solyc04g025715	Solyc01g087000	Solyc01g096330	Solyc02g070490	Solyc01g090230
Solyc01g109560	Solyc02g031790	Solyc01g109655	Solyc02g061870	Solyc03g051900	Solyc04g025100	Solyc01g087130	Solyc01g096650	Solyc02g070530	Solyc01g090250
Solyc01g109570	Solyc02g032020	Solyc01g110340	Solyc02g062917	Solyc03g053010	Solyc04g024980	Solyc01g087140	Solyc01g097140	Solyc02g071120	Solyc01g090340
Solyc01g109655	Solyc02g032320	Solyc01g110590	Solyc02g062920	Solyc03g058190	Solyc04g024840	Solyc01g087190	Solyc01g097430	Solyc02g071360	Solyc01g090360
Solyc01g111090	Solyc02g032620	Solyc01g111090	Solyc02g062975	Solyc03g058310	Solyc04g045310	Solyc01g087300	Solyc01g097660	Solyc02g071390	Solyc01g090380
Solyc01g111330	Solyc02g032650	Solyc01g111680	Solyc02g063060	Solyc03g058405	Solyc04g045315	Solyc01g087320	Solyc01g097770	Solyc02g071365	Solyc01g090470
Solyc01g111780	Solyc02g036210	Solyc01g111860	Solyc02g063255	Solyc03g058420	Solyc04g048950	Solyc01g087565	Solyc01g097790	Solyc02g071420	Solyc01g090600
Solyc02g055370	Solyc02g037530	Solyc01g112250	Solyc02g064760	Solyc03g059310	Solyc04g049807	Solyc01g088080	Solyc01g097780	Solyc02g071860	Solyc01g090810
Solyc02g050180	Solyc02g037540	Solyc01g112310	Solyc02g064800	Solyc03g059420	Solyc04g051690	Solyc01g088400	Solyc01g097950	Solyc02g071920	Solyc01g090850
Solyc02g005517	Solyc00g007320	Solyc02g005110	Solyc02g065010	Solyc03g062660	Solyc04g051870	Solyc01g088540	Solyc01g098090	Solyc02g071990	Solyc01g090880
Solyc02g011985	Solyc02g062610	Solyc02g005115	Solyc02g065490	Solyc03g062790	Solyc04g055207	Solyc01g090250	Solyc01g098150	Solyc02g072430	Solyc01g090890
Solyc02g012020	Solyc02g062640	Solyc02g005290	Solyc02g065540	Solyc03g062910	Solyc04g055260	Solyc01g090500	Solyc01g098160	Solyc02g076945	Solyc01g091030
Solyc02g014350	Solyc02g062680	Solyc02g005510	Solyc02g065620	Solyc03g063240	Solyc04g056360	Solyc01g090600	Solyc01g098320	Solyc02g077120	Solyc01g091090
Solyc02g014470	Solyc02g063255	Solyc02g010620	Solyc02g065630	Solyc03g063720	Solyc04g056600	Solyc01g090610	Solyc01g098600	Solyc02g077225	Solyc01g091290
Solyc02g014780	Solyc02g063330	Solyc02g011820	Solyc02g067830	Solyc03g063805	Solyc04g058160	Solyc01g091010	Solyc01g098710	Solyc02g077230	Solyc01g091480
Solyc02g014790	Solyc02g063340	Solyc02g011830	Solyc02g068140	Solyc03g065070	Solyc04g064600	Solyc01g091770	Solyc01g099220	Solyc02g079030	Solyc01g091540
Solyc02g014800	Solyc02g063548	Solyc02g011840	Solyc02g068190	Solyc03g065190	Solyc04g071807	Solyc01g092950	Solyc01g099385	Solyc02g079960	Solyc01g091580
Solyc02g020980	Solyc02g064550	Solyc02g011985	Solyc02g068680	Solyc03g013460	Solyc04g076280	Solyc01g094030	Solyc01g099620	Solyc02g080200	Solyc01g091620
Solyc02g021010	Solyc02g064910	Solyc02g014250	Solyc02g068820	Solyc03g013160	Solyc04g077640	Solyc01g094090	Solyc01g099790	Solyc02g080210	Solyc01g091710
Solyc02g021160	Solyc02g065540	Solyc02g014350	Solyc02g069320	Solyc03g078120	Solyc04g078020	Solyc01g094160	Solyc01g100095	Solyc02g080780	Solyc01g091890
Solyc02g021240	Solyc10g077150	Solyc02g014770	Solyc02g069610	Solyc03g083140	Solyc04g079080	Solyc01g094230	Solyc01g100190	Solyc02g080790	Solyc01g091900
Solyc02g021470	Solyc02g067590	Solyc02g021050	Solyc02g069670	Solyc03g091010	Solyc04g080980	Solyc01g094237	Solyc01g100240	Solyc02g081050	Solyc01g091910
Solyc02g021650	Solyc02g068180	Solyc02g021160	Solyc02g069680	Solyc03g095220	Solyc04g081950	Solyc01g094270	Solyc01g100455	Solyc02g081130	Solyc01g093990
Solyc02g022870	Solyc02g068670	Solyc02g021368	Solyc02g069800	Solyc03g095450	Solyc04g082230	Solyc01g094350	Solyc01g100470	Solyc02g081170	Solyc01g094050
Solyc02g023940	Solyc02g068830	Solyc02g021560	Solyc02g069950	Solyc03g095810	Solyc05g005540	Solyc01g094380	Solyc01g100570	Solyc02g081340	Solyc01g094220
Solyc02g030120	Solyc02g068970	Solyc02g021650	Solyc02g070180	Solyc03g096130	Solyc05g005680	Solyc01g094750	Solyc01g100690	Solyc02g081360	Solyc01g094230
Solyc02g030215	Solyc02g069160	Solyc02g021760	Solyc02g070850	Solyc03g096140	Solyc05g007420	Solyc01g094960	Solyc01g101035	Solyc02g081500	Solyc01g094240
Solyc02g030220	Solyc02g069220	Solyc02g022830	Solyc02g071100	Solyc03g096306	Solyc05g008840	Solyc01g095120	Solyc01g101080	Solyc02g081910	Solyc01g094237
Solyc02g032060	Solyc02g069230	Solyc02g023940	Solyc02g071240	Solyc03g097520	Solyc05g008920	Solyc01g096050	Solyc01g101220	Solyc02g081980	Solyc01g094300
Solyc02g032173	Solyc02g069320	Solyc02g030095	Solyc02g071320	Solyc03g097585	Solyc05g009300	Solyc01g096660	Solyc01g102480	Solyc02g082110	Solyc01g094310
Solyc02g032553	Solyc02g069670	Solyc02g030210	Solyc02g071920	Solyc03g110900	Solyc05g009540	Solyc01g096780	Solyc01g102510	Solyc02g082900	Solyc01g094360
Solyc02g036260	Solyc02g069920	Solyc02g030450	Solyc02g076730	Solyc03g110910	Solyc05g009630	Solyc01g096790	Solyc01g102720	Solyc02g082910	Solyc01g094460
Solyc00g007320	Solyc02g070215	Solyc02g032020	Solyc02g076740	Solyc03g111455	Solyc05g013780	Solyc01g097190	Solyc01g102940	Solyc02g083440	Solyc01g094500
Solyc00g007160	Solyc02g070330	Solyc02g032600	Solyc02g077380	Solyc03g111630	Solyc05g013820	Solyc01g097555	Solyc01g103250	Solyc02g083510	Solyc01g094510
Solyc02g062000	Solyc02g070520	Solyc02g032930	Solyc02g078210	Solyc03g112140	Solyc05g015630	Solyc01g097630	Solyc01g103290	Solyc02g084200	Solyc01g094660
Solyc02g062110	Solyc02g070830	Solyc02g033050	Solyc02g078910	Solyc03g113500	Solyc05g016000	Solyc01g097790	Solyc01g103295	Solyc02g084340	Solyc01g094700
Solyc02g062780	Solyc02g071040	Solyc02g033100	Solyc02g079250	Solyc03g114380	Solyc05g016330	Solyc01g097960	Solyc01g103510	Solyc02g084800	Solyc01g094780
Solyc02g062960	Solyc02g071340	Solyc02g036330	Solyc02g079400	Solyc03g114470	Solyc05g017720	Solyc01g098160	Solyc01g104040	Solyc02g084790	Solyc01g094890
Solyc02g063360	Solyc02g071610	Solyc02g036470	Solyc02g079410	Solyc03g115160	Solyc05g018230	Solyc01g098310	Solyc01g104060	Solyc02g084820	Solyc01g094990
Solyc02g063548	Solyc02g071690	Solyc02g037510	Solyc02g079710	Solyc03g115680	Solyc05g021480	Solyc01g098320	Solyc01g104270	Solyc02g084930	Solyc01g095010
Solyc02g064900	Solyc02g072090	Solyc02g038720	Solyc02g080220	Solyc03g117390	Solyc05g021485	Solyc01g098610	Solyc01g104434	Solyc02g084950	Solyc01g095030
Solyc02g065110	Solyc02g072230	Solyc00g007110	Solyc02g081190	Solyc03g117420	Solyc05g023640	Solyc01g098710	Solyc01g104670	Solyc02g085430	Solyc01g095060
Solyc02g065180	Solyc02g072470	Solyc00g007030	Solyc02g082670	Solyc03g117960	Solyc05g025550	Solyc01g098760	Solyc01g104840	Solyc02g085500	Solyc01g095130
Solyc02g065280	Solyc02g076730	Solyc02g061960	Solyc02g082690	Solyc03g119730	Solyc05g026150	Solyc01g099030	Solyc01g104890	Solyc02g085880	Solyc01g095510
Solyc02g065730	Solyc02g077410	Solyc02g062780	Solyc02g082900	Solyc03g119760	Solyc05g032665	Solyc01g099530	Solyc01g104970	Solyc02g085910	Solyc01g095680
Solyc02g067105	Solyc02g077470	Solyc02g062870	Solyc02g083810	Solyc03g120600	Solyc05g042077	Solyc01g099640	Solyc01g105740	Solyc02g086145	Solyc01g095720
Solyc02g067240	Solyc02g077680	Solyc02g062920	Solyc02g084270	Solyc03g121010	Solyc05g046350	Solyc01g099645	Solyc01g106105	Solyc02g086330	Solyc01g095770
Solyc02g067320	Solyc02g077830	Solyc02g063360	Solyc02g084280	Solyc04g005100	Solyc05g047390	Solyc01g099690	Solyc01g106943	Solyc02g086630	Solyc01g095780
Solyc02g067590	Solyc02g077910	Solyc02g064800	Solyc02g084870	Solyc04g005470	Solyc05g048830	Solyc01g099810	Solyc01g107660	Solyc02g086700	Solyc01g095900
Solyc02g068090	Solyc02g078440	Solyc02g065020	Solyc02g085833	Solyc04g007825	Solyc05g050000	Solyc01g100450	Solyc01g107990	Solyc02g086850	Solyc01g095950
Solyc02g068130	Solyc02g078740	Solyc02g065060	Solyc02g085837	Solyc04g008150	Solyc05g050100	Solyc01g100690	Solyc01g108160	Solyc02g086920	Solyc01g096030
Solyc02g068930	Solyc02g078750	Solyc02g065150	Solyc02g085870	Solyc04g008490	Solyc05g050110	Solyc01g100720	Solyc01g108530	Solyc02g087110	Solyc01g096080
Solyc02g069160	Solyc02g078810	Solyc02g065490	Solyc02g086260	Solyc04g009170	Solyc05g051060	Solyc01g101035	Solyc01g108720	Solyc02g087250	Solyc01g096190
Solyc02g069290	Solyc02g079025	Solyc02g065600	Solyc02g086710	Solyc04g009930	Solyc05g051620	Solyc01g101170	Solyc01g108780	Solyc02g087450	Solyc01g096370
Solyc02g070180	Solyc02g079250	Solyc02g065720	Solyc02g086770	Solyc04g010110	Solyc05g052040	Solyc01g102400	Solyc01g108870	Solyc02g087730	Solyc01g096400
Solyc02g070450	Solyc02g079300	Solyc02g066860	Solyc02g086940	Solyc04g010250	Solyc05g052270	Solyc01g102480	Solyc01g109170	Solyc02g088200	Solyc01g096470
Solyc02g070460	Solyc02g079310	Solyc02g067450	Solyc02g087240	Solyc04g012180	Solyc05g053670	Solyc01g102730	Solyc01g109290	Solyc02g088425	Solyc01g096790
Solyc02g070490	Solyc02g079390	Solyc02g068130	Solyc02g087360	Solyc04g015200	Solyc05g053770	Solyc01g103630	Solyc01g109500	Solyc02g088620	Solyc01g096800
Solyc02g070520	Solyc02g079570	Solyc02g068140	Solyc02g088080	Solyc04g015450	Solyc05g054210	Solyc01g103960	Solyc01g109660	Solyc02g088780	Solyc01g096990
Solyc02g071040	Solyc02g080130	Solyc02g069010	Solyc02g088180	Solyc04g015680	Solyc05g054730	Solyc01g104000	Solyc01g109655	Solyc02g088770	Solyc01g097110
Solyc02g071050	Solyc02g080410	Solyc02g069060	Solyc02g089520	Solyc04g017620	Solyc05g056545	Solyc01g104260	Solyc01g109670	Solyc02g089075	Solyc01g097210
Solyc02g071340	Solyc02g080500	Solyc02g069950	Solyc02g090160	Solyc04g019315	Solyc06g005230	Solyc01g104437	Solyc01g109940	Solyc02g089205	Solyc01g097320
Solyc02g071360	Solyc02g081400	Solyc02g070330	Solyc02g090490	Solyc04g040030	Solyc06g008290	Solyc01g104438	Solyc01g110060	Solyc02g089267	Solyc01g097390
Solyc02g071475	Solyc02g081410	Solyc02g070400	Solyc02g090540	Solyc04g039905	Solyc06g008500	Solyc01g104444	Solyc01g111130	Solyc02g089790	Solyc01g097430
Solyc02g071480	Solyc02g082215	Solyc02g070490	Solyc02g090630	Solyc04g039675	Solyc06g009400	Solyc01g104446	Solyc01g111140	Solyc02g089930	Solyc01g097640
Solyc02g072120	Solyc02g082220	Solyc02g070845	Solyc02g090900	Solyc04g026271	Solyc06g035490	Solyc01g104490	Solyc01g111380	Solyc02g090315	Solyc01g097790
Solyc02g072230	Solyc02g082620	Solyc02g071120	Solyc02g091070	Solyc04g025870	Solyc06g035900	Solyc01g104770	Solyc01g112010	Solyc02g090350	Solyc01g097840
Solyc02g072430	Solyc02g082840	Solyc02g071360	Solyc02g091250	Solyc04g025655	Solyc06g035910	Solyc01g104890	Solyc01g112090	Solyc02g090395	Solyc01g097950
Solyc02g072440	Solyc02g082850	Solyc02g071610	Solyc02g091350	Solyc04g025377	Solyc06g036470	Solyc01g105520	Solyc01g112245	Solyc02g090930	Solyc01g098180
Solyc02g072443	Solyc02g083630	Solyc02g071920	Solyc02g091460	Solyc04g025300	Solyc06g050630	Solyc01g105570	Solyc01g112330	Solyc02g091090	Solyc01g098370
Solyc02g076740	Solyc02g083730	Solyc02g076740	Solyc02g092150	Solyc04g024885	Solyc06g051440	Solyc01g105600	Solyc01g112340	Solyc02g091390	Solyc01g098430
Solyc02g076780	Solyc02g083740	Solyc02g076840	Solyc02g092510	Solyc04g024785	Solyc06g052110	Solyc01g105740	Solyc02g055465	Solyc02g091430	Solyc01g098550
Solyc02g077645	Solyc02g083950	Solyc02g077770	Solyc02g092950	Solyc04g024340	Solyc06g053650	Solyc01g105820	Solyc02g055370	Solyc02g091840	Solyc01g098600
Solyc02g077830	Solyc02g084037	Solyc02g078530	Solyc02g093060	Solyc04g045660	Solyc06g054240	Solyc01g106420	Solyc02g005115	Solyc02g092050	Solyc01g098680
Solyc02g077910	Solyc02g084940	Solyc02g078920	Solyc02g093220	Solyc04g049240	Solyc06g060440	Solyc01g106440	Solyc02g010620	Solyc02g092420	Solyc01g098710
Solyc02g078010	Solyc02g085190	Solyc02g079000	Solyc02g093610	Solyc04g049260	Solyc06g060790	Solyc01g106450	Solyc02g011820	Solyc02g092560	Solyc01g098760
Solyc02g078160	Solyc02g085690	Solyc02g079710	Solyc02g093690	Solyc04g049290	Solyc06g061030	Solyc01g106950	Solyc02g011830	Solyc02g092580	Solyc01g098840
Solyc02g078790	Solyc02g085730	Solyc02g080210	Solyc02g093935	Solyc04g049380	Solyc06g064660	Solyc01g106980	Solyc02g011940	Solyc02g092760	Solyc01g099230
Solyc02g078810	Solyc02g085800	Solyc02g080320	Solyc02g094280	Solyc04g050150	Solyc06g071140	Solyc01g107280	Solyc02g011950	Solyc02g092770	Solyc01g099385
Solyc02g079000	Solyc02g085850	Solyc02g080310	Solyc03g005860	Solyc04g050576	Solyc06g071500	Solyc01g108720	Solyc02g012010	Solyc02g092790	Solyc01g099400
Solyc02g079330	Solyc02g086050	Solyc02g080730	Solyc03g006385	Solyc04g050790	Solyc06g073110	Solyc01g108870	Solyc02g014470	Solyc02g092810	Solyc01g099600
Solyc02g080140	Solyc02g086170	Solyc02g080740	Solyc03g006390	Solyc04g051090	Solyc06g073137	Solyc01g109160	Solyc02g014780	Solyc02g093630	Solyc01g099660
Solyc02g080790	Solyc02g086870	Solyc02g081520	Solyc03g007710	Solyc04g051097	Solyc06g073190	Solyc01g109170	Solyc02g014790	Solyc02g094360	Solyc01g099740
Solyc02g081160	Solyc02g087570	Solyc02g082280	Solyc03g025210	Solyc04g051490	Solyc06g073330	Solyc01g109540	Solyc02g014800	Solyc03g005010	Solyc01g100010
Solyc02g081770	Solyc02g088513	Solyc02g082450	Solyc03g025300	Solyc04g053085	Solyc06g073585	Solyc01g109530	Solyc02g021160	Solyc03g005140	Solyc01g100045
Solyc02g082090	Solyc02g088630	Solyc02g085040	Solyc03g025360	Solyc04g055200	Solyc06g073790	Solyc01g109655	Solyc02g021366	Solyc03g005450	Solyc01g100050
Solyc02g082613	Solyc02g088830	Solyc02g087360	Solyc03g025455	Solyc04g056730	Solyc06g075780	Solyc01g111090	Solyc02g021368	Solyc03g005710	Solyc01g100190
Solyc02g082820	Solyc02g088890	Solyc02g087580	Solyc03g025720	Solyc04g056745	Solyc06g082030	Solyc01g111330	Solyc02g021400	Solyc03g005920	Solyc01g100350
Solyc02g083050	Solyc02g089200	Solyc02g089075	Solyc03g025795	Solyc04g064600	Solyc06g082080	Solyc01g111680	Solyc02g023970	Solyc03g005950	Solyc01g100360
Solyc02g083220	Solyc02g089270	Solyc02g089520	Solyc03g025800	Solyc04g070983	Solyc06g082430	Solyc01g111780	Solyc02g032020	Solyc03g006080	Solyc01g100370
Solyc02g083950	Solyc02g089650	Solyc02g089515	Solyc03g025900	Solyc04g070985	Solyc06g082480	Solyc01g111860	Solyc02g032650	Solyc03g006100	Solyc01g100400
Solyc02g084117	Solyc02g090330	Solyc02g090395	Solyc03g026000	Solyc04g071060	Solyc06g082860	Solyc01g112250	Solyc02g033050	Solyc03g006150	Solyc01g100410
Solyc02g084130	Solyc02g090360	Solyc02g090470	Solyc03g026310	Solyc04g071610	Solyc02g094770	Solyc01g112310	Solyc02g036210	Solyc03g006610	Solyc01g100530
Solyc02g084190	Solyc02g090800	Solyc02g090620	Solyc03g026330	Solyc04g072240	Solyc07g005600	Solyc02g055370	Solyc02g036360	Solyc03g006770	Solyc01g100700
Solyc02g084570	Solyc02g091300	Solyc02g090820	Solyc03g031490	Solyc04g072440	Solyc07g006310	Solyc02g005110	Solyc02g036470	Solyc03g006930	Solyc01g100760
Solyc02g085250	Solyc02g091420	Solyc02g090900	Solyc03g031810	Solyc04g076303	Solyc07g006650	Solyc02g005115	Solyc02g037530	Solyc03g007030	Solyc01g100790
Solyc02g086010	Solyc02g091525	Solyc02g091070	Solyc03g031890	Solyc04g077080	Solyc07g007340	Solyc02g005290	Solyc02g038720	Solyc03g007290	Solyc01g100870
Solyc02g086050	Solyc02g091730	Solyc02g091700	Solyc03g031910	Solyc04g077615	Solyc07g008095	Solyc02g005510	Solyc00g007270	Solyc03g007480	Solyc01g100890
Solyc02g086110	Solyc02g092180	Solyc02g092145	Solyc03g031950	Solyc04g078020	Solyc07g008350	Solyc02g005517	Solyc00g007110	Solyc03g007920	Solyc01g101010
Solyc02g086145	Solyc02g092330	Solyc02g092290	Solyc03g031990	Solyc04g078440	Solyc07g008500	Solyc02g010620	Solyc00g007100	Solyc03g025270	Solyc01g101020
Solyc02g086250	Solyc02g092380	Solyc02g093160	Solyc03g032000	Solyc04g078840	Solyc07g008570	Solyc02g011820	Solyc02g062610	Solyc03g025410	Solyc01g101035
Solyc02g086400	Solyc02g092390	Solyc02g093300	Solyc03g032230	Solyc04g078860	Solyc07g008780	Solyc02g011830	Solyc02g062640	Solyc03g025670	Solyc01g101040
Solyc02g086650	Solyc03g005150	Solyc02g093770	Solyc03g033330	Solyc04g081955	Solyc07g009560	Solyc02g011840	Solyc02g062680	Solyc03g025680	Solyc01g101050
Solyc02g086660	Solyc03g005260	Solyc02g094640	Solyc03g033390	Solyc05g005780	Solyc07g009575	Solyc02g011985	Solyc02g062917	Solyc03g025760	Solyc01g101090
Solyc02g086870	Solyc03g005670	Solyc02g094751	Solyc03g033500	Solyc05g006210	Solyc07g014750	Solyc02g012020	Solyc02g062920	Solyc03g025830	Solyc01g101220
Solyc02g086920	Solyc03g005770	Solyc03g005690	Solyc03g033540	Solyc05g007360	Solyc07g015820	Solyc02g014350	Solyc02g062975	Solyc03g025860	Solyc01g102280
Solyc02g087070	Solyc03g005860	Solyc03g005930	Solyc03g034050	Solyc05g008840	Solyc07g016095	Solyc02g014470	Solyc02g063330	Solyc03g026170	Solyc01g102285
Solyc02g088780	Solyc03g005890	Solyc03g005950	Solyc03g034057	Solyc05g009700	Solyc07g018250	Solyc02g014770	Solyc02g063340	Solyc03g026280	Solyc01g102480
Solyc02g088830	Solyc03g006000	Solyc03g006140	Solyc03g034170	Solyc05g009820	Solyc07g018380	Solyc02g014780	Solyc02g063548	Solyc03g031600	Solyc01g102510
Solyc02g088890	Solyc03g006040	Solyc03g006240	Solyc03g034300	Solyc05g009875	Solyc07g019550	Solyc02g014790	Solyc02g064550	Solyc03g031740	Solyc01g102700
Solyc02g088983	Solyc03g006110	Solyc03g006380	Solyc03g042524	Solyc05g010030	Solyc07g019650	Solyc02g014800	Solyc02g064760	Solyc03g031730	Solyc01g102760
Solyc02g089075	Solyc03g006530	Solyc03g006390	Solyc03g043600	Solyc05g010363	Solyc07g020730	Solyc02g021010	Solyc02g064800	Solyc03g031880	Solyc01g102940
Solyc02g089210	Solyc03g006540	Solyc03g006420	Solyc03g043715	Solyc05g012500	Solyc07g024020	Solyc02g021050	Solyc02g065010	Solyc03g031950	Solyc01g103250
Solyc02g089267	Solyc03g006560	Solyc03g006500	Solyc03g043720	Solyc05g012780	Solyc07g026710	Solyc02g021240	Solyc02g065540	Solyc03g032100	Solyc01g103350
Solyc02g090380	Solyc03g006930	Solyc03g006830	Solyc03g043790	Solyc05g013820	Solyc07g039580	Solyc02g021368	Solyc02g065630	Solyc03g033260	Solyc01g103380
Solyc02g090500	Solyc03g006940	Solyc03g007100	Solyc03g043930	Solyc05g014290	Solyc07g041490	Solyc02g021470	Solyc10g077150	Solyc03g033560	Solyc01g103400
Solyc02g090505	Solyc03g007110	Solyc03g007420	Solyc03g044028	Solyc05g015410	Solyc07g041515	Solyc02g021560	Solyc02g067590	Solyc03g033700	Solyc01g103430
Solyc02g091530	Solyc03g007200	Solyc03g007660	Solyc03g044160	Solyc05g016195	Solyc07g041623	Solyc02g022830	Solyc02g067830	Solyc03g033745	Solyc01g103440
Solyc02g091525	Solyc03g007470	Solyc03g025300	Solyc03g044270	Solyc05g016440	Solyc07g041680	Solyc02g022870	Solyc02g068140	Solyc03g033790	Solyc01g103695
Solyc02g091550	Solyc03g007810	Solyc03g025410	Solyc03g044880	Solyc05g017893	Solyc07g042710	Solyc02g023940	Solyc02g068180	Solyc03g034120	Solyc01g103700
Solyc02g091840	Solyc03g007840	Solyc03g025380	Solyc03g045035	Solyc05g018037	Solyc07g043030	Solyc02g030095	Solyc02g068190	Solyc03g034240	Solyc01g103850
Solyc02g092360	Solyc03g007870	Solyc03g025610	Solyc03g051790	Solyc05g018300	Solyc07g044930	Solyc02g030450	Solyc02g068670	Solyc03g044080	Solyc01g104060
Solyc02g092780	Solyc03g025670	Solyc03g025760	Solyc03g058310	Solyc05g018410	Solyc07g049470	Solyc02g032020	Solyc02g068680	Solyc03g044100	Solyc01g104055
Solyc02g092830	Solyc03g026020	Solyc03g025980	Solyc03g058320	Solyc05g018600	Solyc07g049510	Solyc02g033050	Solyc02g068820	Solyc03g044097	Solyc01g104070
Solyc02g094620	Solyc03g026300	Solyc03g026050	Solyc03g058365	Solyc05g018650	Solyc07g051920	Solyc02g033100	Solyc02g068970	Solyc03g044230	Solyc01g104140
Solyc02g094640	Solyc03g026350	Solyc03g026170	Solyc03g058420	Solyc05g021530	Solyc07g052830	Solyc02g036260	Solyc02g069160	Solyc03g044740	Solyc01g104150
Solyc03g005150	Solyc03g031440	Solyc03g026250	Solyc03g061540	Solyc05g023660	Solyc07g054040	Solyc02g036330	Solyc02g069320	Solyc03g044930	Solyc01g104190
Solyc03g005170	Solyc03g033280	Solyc03g031510	Solyc03g062900	Solyc05g024340	Solyc07g054070	Solyc02g036470	Solyc02g069610	Solyc03g045140	Solyc01g104240
Solyc03g005260	Solyc03g033720	Solyc03g031670	Solyc03g063220	Solyc05g024373	Solyc07g054590	Solyc02g038720	Solyc02g069670	Solyc03g058950	Solyc01g104270
Solyc03g005390	Solyc03g034260	Solyc03g031810	Solyc03g063490	Solyc05g032665	Solyc07g055790	Solyc00g007160	Solyc02g069680	Solyc03g063100	Solyc01g104300
Solyc03g005830	Solyc03g043630	Solyc03g031820	Solyc03g063493	Solyc05g040020	Solyc07g055850	Solyc00g007110	Solyc02g069800	Solyc03g063110	Solyc01g104380
Solyc03g005900	Solyc03g043700	Solyc03g031860	Solyc03g065190	Solyc05g040100	Solyc07g056320	Solyc00g007030	Solyc02g069950	Solyc03g078090	Solyc01g104410
Solyc03g005950	Solyc03g043860	Solyc03g031950	Solyc03g079900	Solyc05g041530	Solyc07g056370	Solyc02g061960	Solyc02g070180	Solyc03g078420	Solyc01g104600
Solyc03g006020	Solyc03g043855	Solyc03g032110	Solyc03g082460	Solyc05g041570	Solyc07g062530	Solyc02g062000	Solyc02g070215	Solyc03g078813	Solyc01g104630
Solyc03g006130	Solyc03g044880	Solyc03g032120	Solyc03g082470	Solyc05g041590	Solyc07g064380	Solyc02g062780	Solyc02g070520	Solyc03g079910	Solyc01g104640
Solyc03g006210	Solyc03g044990	Solyc03g033260	Solyc03g082560	Solyc05g042077	Solyc07g065050	Solyc02g062870	Solyc02g070830	Solyc03g081320	Solyc01g104660
Solyc03g006350	Solyc03g046547	Solyc03g033695	Solyc03g082600	Solyc05g047580	Solyc07g065720	Solyc02g062920	Solyc02g071040	Solyc03g082380	Solyc01g104775
Solyc03g006540	Solyc03g051970	Solyc03g033810	Solyc03g082840	Solyc05g047714	Solyc08g005725	Solyc02g062960	Solyc02g071100	Solyc03g082590	Solyc01g104970
Solyc03g006610	Solyc03g058855	Solyc03g034000	Solyc03g082920	Solyc05g050000	Solyc08g006030	Solyc02g063360	Solyc02g071240	Solyc03g082680	Solyc01g105070
Solyc03g006770	Solyc03g058857	Solyc03g034010	Solyc03g083000	Solyc05g050100	Solyc08g006210	Solyc02g063548	Solyc02g071320	Solyc03g082720	Solyc01g105100
Solyc03g006930	Solyc03g059270	Solyc03g034060	Solyc03g083005	Solyc05g050110	Solyc08g006420	Solyc02g064800	Solyc02g071340	Solyc03g083010	Solyc01g105150
Solyc03g007110	Solyc03g061540	Solyc03g034130	Solyc03g083060	Solyc05g051680	Solyc08g007270	Solyc02g065020	Solyc02g071610	Solyc03g083040	Solyc01g105180
Solyc03g007660	Solyc03g061550	Solyc03g034165	Solyc03g083120	Solyc05g053130	Solyc08g007370	Solyc02g065060	Solyc02g071690	Solyc03g083070	Solyc01g105300
Solyc03g007770	Solyc03g061580	Solyc03g034206	Solyc03g083160	Solyc05g053670	Solyc08g008180	Solyc02g065110	Solyc02g071920	Solyc03g083270	Solyc01g105360
Solyc03g025190	Solyc03g062905	Solyc03g034280	Solyc03g083170	Solyc05g053770	Solyc08g008400	Solyc02g065150	Solyc02g072230	Solyc03g083360	Solyc01g105790
Solyc03g025410	Solyc03g062910	Solyc03g034400	Solyc03g083500	Solyc05g053965	Solyc08g013980	Solyc02g065280	Solyc02g072470	Solyc03g083460	Solyc01g105800
Solyc03g025380	Solyc03g063053	Solyc03g043577	Solyc03g083615	Solyc05g054620	Solyc08g014350	Solyc02g065490	Solyc02g076730	Solyc03g093380	Solyc01g106010
Solyc03g025980	Solyc03g063060	Solyc03g043660	Solyc03g083670	Solyc05g054640	Solyc08g015630	Solyc02g065730	Solyc02g076740	Solyc03g093430	Solyc01g106070
Solyc03g031800	Solyc03g063460	Solyc03g043715	Solyc03g093060	Solyc05g055000	Solyc08g016586	Solyc02g066860	Solyc02g077380	Solyc03g093530	Solyc01g106310
Solyc03g031890	Solyc03g063470	Solyc03g043790	Solyc03g093250	Solyc05g055270	Solyc08g047880	Solyc02g067240	Solyc02g077470	Solyc03g093850	Solyc01g106360
Solyc03g032110	Solyc03g064047	Solyc03g043890	Solyc03g093550	Solyc05g056590	Solyc08g042143	Solyc02g067320	Solyc02g077680	Solyc03g095490	Solyc01g106390
Solyc03g032120	Solyc03g013620	Solyc03g043940	Solyc03g093830	Solyc05g056595	Solyc08g041664	Solyc02g067450	Solyc02g077830	Solyc03g095770	Solyc01g106400
Solyc03g033280	Solyc03g013610	Solyc03g044028	Solyc03g095710	Solyc06g005350	Solyc08g023500	Solyc02g067590	Solyc02g077910	Solyc03g095820	Solyc01g106430
Solyc03g033720	Solyc03g013460	Solyc03g044160	Solyc03g095985	Solyc06g005890	Solyc08g023380	Solyc02g068090	Solyc02g078440	Solyc03g095970	Solyc01g106440
Solyc03g034060	Solyc03g078120	Solyc03g044440	Solyc03g096070	Solyc06g008790	Solyc08g022240	Solyc02g068130	Solyc02g078740	Solyc03g096197	Solyc01g106480
Solyc03g036460	Solyc03g081335	Solyc03g045035	Solyc03g096135	Solyc06g017863	Solyc08g029053	Solyc02g068140	Solyc02g078750	Solyc03g096380	Solyc01g106690
Solyc03g043660	Solyc03g082510	Solyc03g045060	Solyc03g096190	Solyc06g033820	Solyc08g028770	Solyc02g068930	Solyc02g078810	Solyc03g096810	Solyc01g106880
Solyc03g043940	Solyc03g082640	Solyc03g046275	Solyc03g096820	Solyc06g036470	Solyc08g059770	Solyc02g069060	Solyc02g078910	Solyc03g096940	Solyc01g106900
Solyc03g044273	Solyc03g083100	Solyc03g046340	Solyc03g097270	Solyc06g036780	Solyc08g061748	Solyc02g069160	Solyc02g079025	Solyc03g097150	Solyc01g106970
Solyc03g044370	Solyc03g083270	Solyc03g071555	Solyc03g097460	Solyc06g043032	Solyc08g062800	Solyc02g069290	Solyc02g079250	Solyc03g097170	Solyc01g107010
Solyc03g044410	Solyc03g083390	Solyc03g051640	Solyc03g097500	Solyc06g042954	Solyc08g063127	Solyc02g069950	Solyc02g079300	Solyc03g097460	Solyc01g107100
Solyc03g044840	Solyc03g093720	Solyc03g051900	Solyc03g097810	Solyc06g050460	Solyc08g067770	Solyc02g070180	Solyc02g079310	Solyc03g097580	Solyc01g107130
Solyc03g044880	Solyc03g093730	Solyc03g053010	Solyc03g097820	Solyc06g050820	Solyc08g067970	Solyc02g070330	Solyc02g079390	Solyc03g097670	Solyc01g107150
Solyc03g046260	Solyc03g095270	Solyc03g053027	Solyc03g097900	Solyc06g051440	Solyc08g068390	Solyc02g070400	Solyc02g079400	Solyc03g097700	Solyc01g107160
Solyc03g046570	Solyc03g095510	Solyc03g058190	Solyc03g098000	Solyc06g051520	Solyc08g068860	Solyc02g070450	Solyc02g079410	Solyc03g097800	Solyc01g107290
Solyc03g046580	Solyc03g096140	Solyc03g058310	Solyc03g098260	Solyc06g052140	Solyc08g075050	Solyc02g070460	Solyc02g079570	Solyc03g097910	Solyc01g107330
Solyc03g051900	Solyc03g096360	Solyc03g058370	Solyc03g098280	Solyc06g053630	Solyc08g075700	Solyc02g070490	Solyc02g079710	Solyc03g097930	Solyc01g107470
Solyc03g051970	Solyc03g097010	Solyc03g058405	Solyc03g098770	Solyc06g053650	Solyc08g075705	Solyc02g070520	Solyc02g080130	Solyc03g097990	Solyc01g107550
Solyc03g053060	Solyc03g097110	Solyc03g058420	Solyc03g019970	Solyc06g054240	Solyc08g076420	Solyc02g071040	Solyc02g080220	Solyc03g098010	Solyc01g107530
Solyc03g058953	Solyc03g097460	Solyc03g058550	Solyc03g019873	Solyc06g060090	Solyc08g077540	Solyc02g071050	Solyc02g080410	Solyc03g111690	Solyc01g107570
Solyc03g059080	Solyc03g097670	Solyc03g059310	Solyc03g019850	Solyc06g060120	Solyc08g077800	Solyc02g071120	Solyc02g080500	Solyc03g111740	Solyc01g107620
Solyc03g059180	Solyc03g098770	Solyc03g059316	Solyc03g111475	Solyc06g060590	Solyc08g077820	Solyc02g071340	Solyc02g082620	Solyc03g111887	Solyc01g107890
Solyc03g059235	Solyc03g019960	Solyc03g059420	Solyc03g111830	Solyc06g060820	Solyc08g078560	Solyc02g071360	Solyc02g082670	Solyc03g112010	Solyc01g107920
Solyc03g059310	Solyc03g019720	Solyc03g062660	Solyc03g112030	Solyc06g062430	Solyc08g079180	Solyc02g071475	Solyc02g082840	Solyc03g112175	Solyc01g108030
Solyc03g061550	Solyc03g111170	Solyc03g062880	Solyc03g112060	Solyc06g062660	Solyc08g079860	Solyc02g071480	Solyc02g082850	Solyc03g113140	Solyc01g108035
Solyc03g062790	Solyc03g111830	Solyc03g063480	Solyc03g112090	Solyc06g064620	Solyc08g080370	Solyc02g071920	Solyc02g083630	Solyc03g113970	Solyc01g108140
Solyc03g062910	Solyc03g113030	Solyc03g063493	Solyc03g112740	Solyc06g067930	Solyc08g080850	Solyc02g072120	Solyc02g083730	Solyc03g114180	Solyc01g108390
Solyc03g063100	Solyc03g113220	Solyc03g063770	Solyc03g113030	Solyc06g068840	Solyc08g081530	Solyc02g072230	Solyc02g083740	Solyc03g114830	Solyc01g108530
Solyc03g063110	Solyc03g113290	Solyc03g065190	Solyc03g113280	Solyc06g071250	Solyc09g007060	Solyc02g072430	Solyc02g083810	Solyc03g115163	Solyc01g108550
Solyc03g063240	Solyc03g113620	Solyc03g078075	Solyc03g113310	Solyc06g071440	Solyc09g007170	Solyc02g072440	Solyc02g083950	Solyc03g115930	Solyc01g108560
Solyc03g063350	Solyc03g113940	Solyc03g078080	Solyc03g113640	Solyc06g073140	Solyc09g007180	Solyc02g072443	Solyc02g084037	Solyc03g116620	Solyc01g108600
Solyc03g063720	Solyc03g114150	Solyc03g078120	Solyc03g114120	Solyc06g073160	Solyc09g008330	Solyc02g076740	Solyc02g084270	Solyc03g116740	Solyc01g109110
Solyc03g063805	Solyc03g114235	Solyc03g078210	Solyc03g114420	Solyc06g073580	Solyc09g008340	Solyc02g076780	Solyc02g084280	Solyc03g116930	Solyc01g109120
Solyc03g065070	Solyc03g114270	Solyc03g078780	Solyc03g114580	Solyc06g073820	Solyc09g009670	Solyc02g076840	Solyc02g084870	Solyc03g117430	Solyc01g109170
Solyc03g065110	Solyc03g114370	Solyc03g079910	Solyc03g115160	Solyc06g073960	Solyc09g009690	Solyc02g077770	Solyc02g085190	Solyc03g117520	Solyc01g109260
Solyc03g065230	Solyc03g114890	Solyc03g080030	Solyc03g115163	Solyc06g074120	Solyc09g010350	Solyc02g077830	Solyc02g085690	Solyc03g117560	Solyc01g109290
Solyc03g013610	Solyc03g114940	Solyc03g082590	Solyc03g115380	Solyc06g074320	Solyc09g013110	Solyc02g077910	Solyc02g085730	Solyc03g117580	Solyc01g109300
Solyc03g013460	Solyc03g115850	Solyc03g083070	Solyc03g116230	Solyc06g074400	Solyc09g018365	Solyc02g078530	Solyc02g085833	Solyc03g117570	Solyc01g109360
Solyc03g013160	Solyc03g115910	Solyc03g083140	Solyc03g116900	Solyc06g075830	Solyc09g018510	Solyc02g078790	Solyc02g085837	Solyc03g117600	Solyc01g109505
Solyc03g013030	Solyc03g117430	Solyc03g083250	Solyc03g117730	Solyc06g082860	Solyc09g031910	Solyc02g078810	Solyc02g085850	Solyc03g117790	Solyc01g109630
Solyc03g078120	Solyc03g118390	Solyc03g083665	Solyc03g117970	Solyc06g084628	Solyc09g031580	Solyc02g078920	Solyc02g085870	Solyc03g117960	Solyc01g109640
Solyc03g083100	Solyc03g118750	Solyc03g083670	Solyc03g117980	Solyc07g004997	Solyc09g055140	Solyc02g079000	Solyc02g086050	Solyc03g118220	Solyc01g109790
Solyc03g083170	Solyc03g119050	Solyc03g091010	Solyc03g118770	Solyc07g005610	Solyc09g055150	Solyc02g079330	Solyc02g086170	Solyc03g119100	Solyc01g109800
Solyc03g095450	Solyc03g119060	Solyc03g093040	Solyc03g118890	Solyc07g005630	Solyc09g055550	Solyc02g079710	Solyc02g086260	Solyc03g119280	Solyc01g109940
Solyc03g095750	Solyc03g119720	Solyc03g093260	Solyc03g119120	Solyc07g006300	Solyc09g055750	Solyc02g080140	Solyc02g086710	Solyc03g119470	Solyc01g110290
Solyc03g095810	Solyc03g120020	Solyc03g093640	Solyc03g122180	Solyc07g006750	Solyc09g056060	Solyc02g080210	Solyc02g086770	Solyc03g119510	Solyc01g110320
Solyc03g096140	Solyc03g120030	Solyc03g093710	Solyc03g123610	Solyc07g006855	Solyc09g056130	Solyc02g080320	Solyc02g086870	Solyc03g119530	Solyc01g110550
Solyc03g096360	Solyc03g120510	Solyc03g093720	Solyc03g123950	Solyc07g007500	Solyc09g056220	Solyc02g080310	Solyc02g086940	Solyc03g119550	Solyc01g110570
Solyc03g096910	Solyc03g120760	Solyc03g093850	Solyc04g005120	Solyc07g008170	Solyc09g057585	Solyc02g080790	Solyc02g087240	Solyc03g119830	Solyc01g110580
Solyc03g097585	Solyc03g120900	Solyc03g095220	Solyc04g005430	Solyc07g008210	Solyc09g057710	Solyc02g081160	Solyc02g087360	Solyc03g120020	Solyc01g110600
Solyc03g098630	Solyc03g121440	Solyc03g095810	Solyc04g005900	Solyc07g008200	Solyc09g059430	Solyc02g081520	Solyc02g087570	Solyc03g120210	Solyc01g110620
Solyc03g020020	Solyc03g122260	Solyc03g096070	Solyc04g005930	Solyc07g009580	Solyc09g059960	Solyc02g081770	Solyc02g088080	Solyc03g120300	Solyc01g110760
Solyc03g110900	Solyc03g122280	Solyc03g096130	Solyc04g007470	Solyc07g009575	Solyc09g061520	Solyc02g082090	Solyc02g088513	Solyc03g120770	Solyc01g111060
Solyc03g110910	Solyc03g122340	Solyc03g096306	Solyc04g007480	Solyc07g015810	Solyc09g072780	Solyc02g082280	Solyc02g088630	Solyc03g120885	Solyc01g111400
Solyc03g111000	Solyc03g123660	Solyc03g096380	Solyc04g007520	Solyc07g016080	Solyc09g073000	Solyc02g082450	Solyc02g088830	Solyc03g121000	Solyc01g111710
Solyc03g111010	Solyc03g123880	Solyc03g097150	Solyc04g007660	Solyc07g016095	Solyc09g074400	Solyc02g082613	Solyc02g089200	Solyc03g121180	Solyc01g111730
Solyc03g111510	Solyc04g005500	Solyc03g097140	Solyc04g008180	Solyc07g017510	Solyc09g074430	Solyc02g082820	Solyc02g089270	Solyc03g122270	Solyc01g111840
Solyc03g111570	Solyc04g005560	Solyc03g097470	Solyc04g008310	Solyc07g017990	Solyc09g082910	Solyc02g083050	Solyc02g089650	Solyc03g124040	Solyc01g111870
Solyc03g111630	Solyc04g005750	Solyc03g097520	Solyc04g008320	Solyc07g018140	Solyc09g090310	Solyc02g083220	Solyc02g090160	Solyc04g005380	Solyc01g111900
Solyc03g111690	Solyc04g005790	Solyc03g097585	Solyc04g008530	Solyc07g018380	Solyc09g090330	Solyc02g083950	Solyc02g090330	Solyc04g005850	Solyc02g055565
Solyc03g111830	Solyc04g007360	Solyc03g098200	Solyc04g008910	Solyc07g019650	Solyc09g091310	Solyc02g084117	Solyc02g090360	Solyc04g006990	Solyc02g050283
Solyc03g111840	Solyc04g007780	Solyc03g019970	Solyc04g009040	Solyc07g024020	Solyc09g091720	Solyc02g084130	Solyc02g090490	Solyc04g007070	Solyc02g005510
Solyc03g112010	Solyc04g008150	Solyc03g019870	Solyc04g009230	Solyc07g025490	Solyc09g091770	Solyc02g084190	Solyc02g090540	Solyc04g007420	Solyc02g014030
Solyc03g113500	Solyc04g008200	Solyc03g111455	Solyc04g009260	Solyc07g026710	Solyc09g091920	Solyc02g084570	Solyc02g090630	Solyc04g007520	Solyc02g014090
Solyc03g113530	Solyc04g008720	Solyc03g111570	Solyc04g009440	Solyc07g026860	Solyc09g092470	Solyc02g085040	Solyc02g090900	Solyc04g007530	Solyc02g014380
Solyc03g114250	Solyc04g009820	Solyc03g112140	Solyc04g009475	Solyc07g032020	Solyc09g098440	Solyc02g085250	Solyc02g091250	Solyc04g007795	Solyc02g014430
Solyc03g114380	Solyc04g009950	Solyc03g113970	Solyc04g009550	Solyc07g032260	Solyc10g006440	Solyc02g086010	Solyc02g091300	Solyc04g007940	Solyc02g021240
Solyc03g114470	Solyc04g010000	Solyc03g115680	Solyc04g011500	Solyc07g039450	Solyc10g006620	Solyc02g086050	Solyc02g091350	Solyc04g008110	Solyc02g021590
Solyc03g114690	Solyc04g011530	Solyc03g116010	Solyc04g011570	Solyc07g039625	Solyc10g006630	Solyc02g086110	Solyc02g091420	Solyc04g008200	Solyc02g021640
Solyc03g115160	Solyc04g011790	Solyc03g116900	Solyc04g011680	Solyc07g039665	Solyc10g006730	Solyc02g086145	Solyc02g091525	Solyc04g008520	Solyc02g021650
Solyc03g115600	Solyc04g014300	Solyc03g116930	Solyc04g011767	Solyc07g041023	Solyc10g007190	Solyc02g086250	Solyc02g091730	Solyc04g009260	Solyc02g022860
Solyc03g116960	Solyc04g014730	Solyc03g117260	Solyc04g011800	Solyc07g041280	Solyc10g007200	Solyc02g086650	Solyc02g092150	Solyc04g009430	Solyc02g023980
Solyc03g118260	Solyc04g014760	Solyc03g117390	Solyc04g013200	Solyc07g041470	Solyc10g007450	Solyc02g086660	Solyc02g092180	Solyc04g009435	Solyc02g030100
Solyc03g118527	Solyc04g014997	Solyc03g117420	Solyc04g014280	Solyc07g041515	Solyc10g007590	Solyc02g087070	Solyc02g092330	Solyc04g009530	Solyc02g030130
Solyc03g118530	Solyc04g015160	Solyc03g117930	Solyc04g014930	Solyc07g041750	Solyc10g007630	Solyc02g087360	Solyc02g092380	Solyc04g009580	Solyc02g031790
Solyc03g119060	Solyc04g015380	Solyc03g117960	Solyc04g015130	Solyc07g042105	Solyc10g007770	Solyc02g087580	Solyc02g092390	Solyc04g010180	Solyc02g032200
Solyc03g119470	Solyc04g015510	Solyc03g118527	Solyc04g015200	Solyc07g042590	Solyc10g007780	Solyc02g088780	Solyc02g092510	Solyc04g010250	Solyc02g032820
Solyc03g119710	Solyc04g016210	Solyc03g119530	Solyc04g015210	Solyc07g042700	Solyc10g007800	Solyc02g088830	Solyc02g092950	Solyc04g011570	Solyc02g032840
Solyc03g119760	Solyc04g016380	Solyc03g119650	Solyc04g015260	Solyc07g042810	Solyc10g008720	Solyc02g088983	Solyc02g093060	Solyc04g014230	Solyc02g032850
Solyc03g120210	Solyc04g016390	Solyc03g119730	Solyc04g015280	Solyc07g042880	Solyc10g008780	Solyc02g089075	Solyc02g093220	Solyc04g014400	Solyc02g036310
Solyc03g120520	Solyc04g016470	Solyc03g120600	Solyc04g015290	Solyc07g042910	Solyc10g008930	Solyc02g089210	Solyc02g093610	Solyc04g014540	Solyc02g036380
Solyc03g120620	Solyc04g018110	Solyc03g121010	Solyc04g015350	Solyc07g045460	Solyc10g011985	Solyc02g089267	Solyc02g093690	Solyc04g014578	Solyc02g036450
Solyc03g121010	Solyc04g040120	Solyc03g121190	Solyc04g015610	Solyc07g049500	Solyc10g012040	Solyc02g090380	Solyc02g094280	Solyc04g014640	Solyc02g037530
Solyc03g121440	Solyc04g039780	Solyc03g121510	Solyc04g015710	Solyc07g052610	Solyc10g012090	Solyc02g090395	Solyc03g005260	Solyc04g014840	Solyc00g007190
Solyc03g122260	Solyc04g026271	Solyc03g121770	Solyc04g015850	Solyc07g053240	Solyc10g012257	Solyc02g090470	Solyc03g005670	Solyc04g015140	Solyc00g007060
Solyc03g122270	Solyc04g025997	Solyc03g121990	Solyc04g016330	Solyc07g055560	Solyc10g017790	Solyc02g090620	Solyc03g005770	Solyc04g015210	Solyc02g061780
Solyc03g123650	Solyc04g025715	Solyc03g123610	Solyc04g017690	Solyc07g055840	Solyc10g018380	Solyc02g090820	Solyc03g005860	Solyc04g016160	Solyc02g061840
Solyc04g005100	Solyc04g024980	Solyc03g124040	Solyc04g017750	Solyc07g056230	Solyc10g018470	Solyc02g090900	Solyc03g005890	Solyc04g016360	Solyc02g062240
Solyc04g005560	Solyc04g045315	Solyc04g005120	Solyc04g040140	Solyc07g056240	Solyc10g033560	Solyc02g091070	Solyc03g006000	Solyc04g016370	Solyc02g062330
Solyc04g005590	Solyc04g048950	Solyc04g005300	Solyc04g039990	Solyc07g056370	Solyc10g037870	Solyc02g091530	Solyc03g006040	Solyc04g017620	Solyc02g062460
Solyc04g007825	Solyc04g049170	Solyc04g005470	Solyc04g040000	Solyc07g056410	Solyc10g061990	Solyc02g091525	Solyc03g006390	Solyc04g017670	Solyc02g062540
Solyc04g007900	Solyc04g050365	Solyc04g005560	Solyc04g039890	Solyc07g062530	Solyc10g062080	Solyc02g091550	Solyc03g006530	Solyc04g040090	Solyc02g062560
Solyc04g007960	Solyc04g050800	Solyc04g005590	Solyc04g039790	Solyc07g063120	Solyc10g062120	Solyc02g091700	Solyc03g006540	Solyc04g040030	Solyc02g062570
Solyc04g008010	Solyc04g051210	Solyc04g007310	Solyc04g039770	Solyc07g064300	Solyc10g050460	Solyc02g091840	Solyc03g006560	Solyc04g026223	Solyc02g062680
Solyc04g008150	Solyc04g051480	Solyc04g007320	Solyc04g039760	Solyc07g064880	Solyc10g053890	Solyc02g092145	Solyc03g006930	Solyc04g045290	Solyc02g062740
Solyc04g008220	Solyc04g052890	Solyc04g007825	Solyc04g026040	Solyc07g065730	Solyc10g054135	Solyc02g092290	Solyc03g006940	Solyc04g045480	Solyc02g062780
Solyc04g008640	Solyc04g055207	Solyc04g007960	Solyc04g025340	Solyc08g005080	Solyc10g075150	Solyc02g092360	Solyc03g007110	Solyc04g045590	Solyc02g062890
Solyc04g009260	Solyc04g056520	Solyc04g008010	Solyc04g025100	Solyc08g005720	Solyc10g078750	Solyc02g092780	Solyc03g007200	Solyc04g049120	Solyc02g062900
Solyc04g009590	Solyc04g058160	Solyc04g008030	Solyc04g024840	Solyc08g005725	Solyc10g079990	Solyc02g093160	Solyc03g007470	Solyc04g050480	Solyc02g062980
Solyc04g009820	Solyc04g071807	Solyc04g008260	Solyc04g045310	Solyc08g006410	Solyc10g081610	Solyc02g094620	Solyc03g007710	Solyc04g050790	Solyc02g062975
Solyc04g010070	Solyc04g072707	Solyc04g008320	Solyc04g045540	Solyc08g008000	Solyc10g081910	Solyc02g094640	Solyc03g007810	Solyc04g051247	Solyc02g063150
Solyc04g010110	Solyc04g074240	Solyc04g008490	Solyc04g047680	Solyc08g014010	Solyc10g083563	Solyc03g005260	Solyc03g007840	Solyc04g051360	Solyc02g063180
Solyc04g011500	Solyc04g074740	Solyc04g008615	Solyc04g049330	Solyc08g014110	Solyc11g005190	Solyc03g005390	Solyc03g007870	Solyc04g053140	Solyc02g063290
Solyc04g011960	Solyc04g074760	Solyc04g008640	Solyc04g049610	Solyc08g014230	Solyc11g005260	Solyc03g005690	Solyc03g025210	Solyc04g054190	Solyc02g063330
Solyc04g012180	Solyc04g076280	Solyc04g009130	Solyc04g049807	Solyc08g014350	Solyc11g006420	Solyc03g005900	Solyc03g025300	Solyc04g054280	Solyc02g063360
Solyc04g014300	Solyc04g076660	Solyc04g009170	Solyc04g050340	Solyc08g014470	Solyc11g006470	Solyc03g005930	Solyc03g025360	Solyc04g056290	Solyc02g063370
Solyc04g014600	Solyc04g076820	Solyc04g009260	Solyc04g050622	Solyc08g015850	Solyc11g008660	Solyc03g005950	Solyc03g025455	Solyc04g056450	Solyc02g064680
Solyc04g015060	Solyc04g077640	Solyc04g009435	Solyc04g050840	Solyc08g016050	Solyc11g011800	Solyc03g006130	Solyc03g025670	Solyc04g056560	Solyc02g064720
Solyc04g015380	Solyc04g077880	Solyc04g009930	Solyc04g051190	Solyc08g016510	Solyc11g012100	Solyc03g006240	Solyc03g025720	Solyc04g056570	Solyc02g064730
Solyc04g016050	Solyc04g078020	Solyc04g010250	Solyc04g051230	Solyc08g044400	Solyc11g012570	Solyc03g006350	Solyc03g025795	Solyc04g056620	Solyc02g064740
Solyc04g016550	Solyc04g078120	Solyc04g011490	Solyc04g051690	Solyc08g042143	Solyc11g012580	Solyc03g006380	Solyc03g025800	Solyc04g057930	Solyc02g064940
Solyc04g017620	Solyc04g078180	Solyc04g011530	Solyc04g051710	Solyc08g042080	Solyc11g013600	Solyc03g006390	Solyc03g025900	Solyc04g057997	Solyc02g064970
Solyc04g019315	Solyc04g078490	Solyc04g011720	Solyc04g051870	Solyc08g041664	Solyc11g020000	Solyc03g006420	Solyc03g026000	Solyc04g058060	Solyc02g064990
Solyc04g039770	Solyc04g078520	Solyc04g011960	Solyc04g052960	Solyc08g029343	Solyc11g020130	Solyc03g006500	Solyc03g026020	Solyc04g063370	Solyc02g065060
Solyc04g039780	Solyc04g078620	Solyc04g011990	Solyc04g054220	Solyc08g029130	Solyc11g020494	Solyc03g006540	Solyc03g026300	Solyc04g063380	Solyc02g065080
Solyc04g026271	Solyc04g079080	Solyc04g013200	Solyc04g055260	Solyc08g059690	Solyc11g021050	Solyc03g006610	Solyc03g026310	Solyc04g064520	Solyc02g065090
Solyc04g025930	Solyc04g079830	Solyc04g014260	Solyc04g056290	Solyc08g059780	Solyc11g022427	Solyc03g006770	Solyc03g026330	Solyc04g064690	Solyc02g065280
Solyc04g025870	Solyc04g080230	Solyc04g014370	Solyc04g056360	Solyc08g061273	Solyc11g051090	Solyc03g006930	Solyc03g026350	Solyc04g064880	Solyc02g065340
Solyc04g025655	Solyc04g080540	Solyc04g014650	Solyc04g056500	Solyc08g061650	Solyc11g051160	Solyc03g007100	Solyc03g031440	Solyc04g071140	Solyc02g065350
Solyc04g025540	Solyc04g080980	Solyc04g014810	Solyc04g056503	Solyc08g061635	Solyc11g027910	Solyc03g007420	Solyc03g031490	Solyc04g071340	Solyc02g065360
Solyc04g025477	Solyc04g081000	Solyc04g014820	Solyc04g056600	Solyc08g062210	Solyc11g045480	Solyc03g007770	Solyc03g031810	Solyc04g071715	Solyc02g065400
Solyc04g025290	Solyc04g081180	Solyc04g014960	Solyc04g057850	Solyc08g062510	Solyc11g045470	Solyc03g025190	Solyc03g031890	Solyc04g071890	Solyc02g065490
Solyc04g024785	Solyc04g082230	Solyc04g015060	Solyc04g058065	Solyc08g062770	Solyc11g042523	Solyc03g025300	Solyc03g031910	Solyc04g072050	Solyc02g065555
Solyc04g024590	Solyc04g082530	Solyc04g015200	Solyc04g064510	Solyc08g065330	Solyc11g039810	Solyc03g025410	Solyc03g031950	Solyc04g072060	Solyc02g065590
Solyc04g024580	Solyc04g082990	Solyc04g015260	Solyc04g064600	Solyc08g065590	Solyc11g062195	Solyc03g025380	Solyc03g031990	Solyc04g072240	Solyc02g065630
Solyc04g024340	Solyc05g005140	Solyc04g015300	Solyc04g071300	Solyc08g065630	Solyc11g063693	Solyc03g025610	Solyc03g032230	Solyc04g072490	Solyc02g065640
Solyc04g045340	Solyc05g005450	Solyc04g015450	Solyc04g071310	Solyc08g065750	Solyc11g065750	Solyc03g025760	Solyc03g033390	Solyc04g072690	Solyc02g065690
Solyc04g045470	Solyc05g005535	Solyc04g015470	Solyc04g071500	Solyc08g065820	Solyc11g066270	Solyc03g026050	Solyc03g033540	Solyc04g072740	Solyc02g065685
Solyc04g045660	Solyc05g005540	Solyc04g015620	Solyc04g071520	Solyc08g066180	Solyc11g066810	Solyc03g026170	Solyc03g033720	Solyc04g072850	Solyc02g066910
Solyc04g047750	Solyc05g006040	Solyc04g015680	Solyc04g071660	Solyc08g066635	Solyc11g067000	Solyc03g031510	Solyc03g034050	Solyc04g074220	Solyc02g067120
Solyc04g049130	Solyc05g006603	Solyc04g015690	Solyc04g072235	Solyc08g066730	Solyc11g067355	Solyc03g031670	Solyc03g034057	Solyc04g074270	Solyc02g067130
Solyc04g049140	Solyc05g006837	Solyc04g015850	Solyc04g072265	Solyc08g066950	Solyc11g068745	Solyc03g031800	Solyc03g034260	Solyc04g074530	Solyc02g067160
Solyc04g049170	Solyc05g007085	Solyc04g015950	Solyc04g072290	Solyc08g067000	Solyc11g069570	Solyc03g031810	Solyc03g034300	Solyc04g074540	Solyc02g067200
Solyc04g049240	Solyc05g007260	Solyc04g016010	Solyc04g072530	Solyc08g074330	Solyc11g071225	Solyc03g031820	Solyc03g043600	Solyc04g074840	Solyc02g067285
Solyc04g049260	Solyc05g007420	Solyc04g016130	Solyc04g072620	Solyc08g075070	Solyc11g071440	Solyc03g031860	Solyc03g043630	Solyc04g077190	Solyc02g067290
Solyc04g049290	Solyc05g007490	Solyc04g016160	Solyc04g072630	Solyc08g076780	Solyc11g072080	Solyc03g031890	Solyc03g043700	Solyc04g077295	Solyc02g067300
Solyc04g049380	Solyc05g007550	Solyc04g016177	Solyc04g072815	Solyc08g076810	Solyc11g072200	Solyc03g031950	Solyc03g043860	Solyc04g077330	Solyc02g067490
Solyc04g049910	Solyc05g007720	Solyc04g016370	Solyc04g072860	Solyc08g077380	Solyc11g072540	Solyc03g033260	Solyc03g043855	Solyc04g077450	Solyc02g067650
Solyc04g050260	Solyc05g007880	Solyc04g017620	Solyc04g074250	Solyc08g077823	Solyc11g072710	Solyc03g033695	Solyc03g043930	Solyc04g077480	Solyc02g067920
Solyc04g050576	Solyc05g008060	Solyc04g016590	Solyc04g074780	Solyc08g077850	Solyc11g073230	Solyc03g033720	Solyc03g044270	Solyc04g077485	Solyc02g067925
Solyc04g050790	Solyc05g008320	Solyc04g017750	Solyc04g076080	Solyc08g079500	Solyc12g005180	Solyc03g034060	Solyc03g044880	Solyc04g077555	Solyc02g067930
Solyc04g050800	Solyc05g008840	Solyc04g040165	Solyc04g076150	Solyc08g079855	Solyc12g005190	Solyc03g034130	Solyc03g044990	Solyc04g077615	Solyc02g068010
Solyc04g050840	Solyc05g009480	Solyc04g040140	Solyc04g076710	Solyc08g080370	Solyc12g006220	Solyc03g034206	Solyc03g051790	Solyc04g077850	Solyc02g068050
Solyc04g051090	Solyc05g009520	Solyc04g040030	Solyc04g076880	Solyc08g081290	Solyc12g006710	Solyc03g034280	Solyc03g051970	Solyc04g078280	Solyc02g068170
Solyc04g051097	Solyc05g009630	Solyc04g039905	Solyc04g077210	Solyc08g082680	Solyc12g007130	Solyc03g034400	Solyc03g058855	Solyc04g078290	Solyc02g068190
Solyc04g051360	Solyc05g009650	Solyc04g039790	Solyc04g077640	Solyc08g082780	Solyc12g009920	Solyc03g036460	Solyc03g058857	Solyc04g078270	Solyc02g068200
Solyc04g051400	Solyc05g009700	Solyc04g039760	Solyc04g077710	Solyc09g005950	Solyc12g013480	Solyc03g043660	Solyc03g059270	Solyc04g078410	Solyc02g068270
Solyc04g051410	Solyc05g009720	Solyc04g039675	Solyc04g078550	Solyc09g007060	Solyc12g017260	Solyc03g043890	Solyc03g061540	Solyc04g078820	Solyc02g068310
Solyc04g051490	Solyc05g009750	Solyc04g026350	Solyc04g079025	Solyc09g008360	Solyc12g017790	Solyc03g043940	Solyc03g061550	Solyc04g079050	Solyc02g068610
Solyc04g051680	Solyc05g009970	Solyc04g026040	Solyc04g079370	Solyc09g008670	Solyc12g019080	Solyc03g044273	Solyc03g062900	Solyc04g079060	Solyc02g068640
Solyc04g054990	Solyc05g012120	Solyc04g025650	Solyc04g079420	Solyc09g009030	Solyc12g019705	Solyc03g044880	Solyc03g063220	Solyc04g079047	Solyc02g068670
Solyc04g056450	Solyc05g012150	Solyc04g025320	Solyc04g079800	Solyc09g009430	Solyc12g019810	Solyc03g045060	Solyc03g063460	Solyc04g079210	Solyc02g068730
Solyc04g056580	Solyc05g012280	Solyc04g025377	Solyc04g079880	Solyc09g009670	Solyc12g077470	Solyc03g046275	Solyc03g063470	Solyc04g079643	Solyc02g068990
Solyc04g056745	Solyc05g012620	Solyc04g025300	Solyc04g080120	Solyc09g009820	Solyc12g027730	Solyc03g046570	Solyc03g063490	Solyc04g079780	Solyc02g068995
Solyc04g056748	Solyc05g012820	Solyc04g025260	Solyc04g080220	Solyc09g011790	Solyc12g062790	Solyc03g046580	Solyc03g063493	Solyc04g080100	Solyc02g069320
Solyc04g057960	Solyc05g013430	Solyc04g024885	Solyc04g080320	Solyc09g011800	Solyc12g035520	Solyc03g071555	Solyc03g013620	Solyc04g080270	Solyc02g069400
Solyc04g057997	Solyc05g013480	Solyc04g024590	Solyc04g080550	Solyc09g012075	Solyc12g036400	Solyc03g051640	Solyc03g013610	Solyc04g080480	Solyc02g069410
Solyc04g063370	Solyc05g013580	Solyc04g024540	Solyc04g081640	Solyc09g014637	Solyc12g036505	Solyc03g051900	Solyc03g078120	Solyc04g080955	Solyc02g069500
Solyc04g064480	Solyc05g014050	Solyc04g024530	Solyc04g081950	Solyc09g014837	Solyc12g036820	Solyc03g051970	Solyc03g079900	Solyc04g081020	Solyc02g069820
Solyc04g064700	Solyc05g014120	Solyc04g045650	Solyc05g005680	Solyc09g015505	Solyc12g039100	Solyc03g053027	Solyc03g081335	Solyc04g081650	Solyc02g069840
Solyc04g071610	Solyc05g014620	Solyc04g045660	Solyc05g006215	Solyc09g015670	Solyc12g040860	Solyc03g053060	Solyc03g082460	Solyc04g081755	Solyc02g069940
Solyc04g072050	Solyc05g015630	Solyc04g047690	Solyc05g006230	Solyc09g017980	Solyc12g042200	Solyc03g058370	Solyc03g082470	Solyc04g081910	Solyc02g070040
Solyc04g072060	Solyc05g018230	Solyc04g047750	Solyc05g006460	Solyc09g018365	Solyc12g044390	Solyc03g058550	Solyc03g082510	Solyc04g082070	Solyc02g070070
Solyc04g072130	Solyc05g023640	Solyc04g049010	Solyc05g006670	Solyc09g018510	Solyc12g044420	Solyc03g058953	Solyc03g082560	Solyc04g082430	Solyc02g070080
Solyc04g072265	Solyc05g023950	Solyc04g049260	Solyc05g007380	Solyc09g042305	Solyc12g049290	Solyc03g059080	Solyc03g082600	Solyc05g005040	Solyc02g070100
Solyc04g072490	Solyc05g024180	Solyc04g049290	Solyc05g007770	Solyc09g042660	Solyc12g049400	Solyc03g059180	Solyc03g082640	Solyc05g005490	Solyc02g070180
Solyc04g072707	Solyc05g024173	Solyc04g049610	Solyc05g007900	Solyc09g031975	Solyc12g056080	Solyc03g059235	Solyc03g082840	Solyc05g005620	Solyc02g070270
Solyc04g072850	Solyc05g024177	Solyc04g050150	Solyc05g007910	Solyc09g031870	Solyc12g056610	Solyc03g059316	Solyc03g082920	Solyc05g005830	Solyc02g070390
Solyc04g072910	Solyc05g024360	Solyc04g050490	Solyc05g008070	Solyc09g050020	Solyc12g088830	Solyc03g059420	Solyc03g083060	Solyc05g005900	Solyc02g070530
Solyc04g074190	Solyc05g025550	Solyc04g050576	Solyc05g008210	Solyc09g055345	Solyc12g088870	Solyc03g061550	Solyc03g083100	Solyc05g006010	Solyc02g070540
Solyc04g074550	Solyc05g026007	Solyc04g050621	Solyc05g008260	Solyc09g055550	Solyc12g094630	Solyc03g062880	Solyc03g083120	Solyc05g006030	Solyc02g071100
Solyc04g076550	Solyc05g026150	Solyc04g050840	Solyc05g008485	Solyc09g056135	Solyc12g096770	Solyc03g063100	Solyc03g083270	Solyc05g006210	Solyc02g071180
Solyc04g076580	Solyc05g026490	Solyc04g050850	Solyc05g008560	Solyc09g057583	Solyc12g096790	Solyc03g063110	Solyc03g083390	Solyc05g006360	Solyc02g071190
Solyc04g077410	Solyc05g041990	Solyc04g051120	Solyc05g008600	Solyc09g057590	Solyc12g096890	Solyc03g063350	Solyc03g083615	Solyc05g006400	Solyc02g071220
Solyc04g077615	Solyc05g043270	Solyc04g051190	Solyc05g008610	Solyc09g059070	Solyc12g098650	Solyc03g063480	Solyc03g083670	Solyc05g006810	Solyc02g071260
Solyc04g078020	Solyc05g043234	Solyc04g051400	Solyc05g008660	Solyc09g061395	Solyc12g098660	Solyc03g063493	Solyc03g093060	Solyc05g007140	Solyc02g071280
Solyc04g078050	Solyc05g045850	Solyc04g051410	Solyc05g008690	Solyc09g065160		Solyc03g063770	Solyc03g093250	Solyc05g007770	Solyc02g071300
Solyc04g078180	Solyc05g046350	Solyc04g051570	Solyc05g008920	Solyc09g072890		Solyc03g063805	Solyc03g093550	Solyc05g007970	Solyc02g071330
Solyc04g078195	Solyc05g047550	Solyc04g051700	Solyc05g009300	Solyc09g074800		Solyc03g065110	Solyc03g093830	Solyc05g008020	Solyc02g071360
Solyc04g078210	Solyc05g047615	Solyc04g051830	Solyc05g009440	Solyc09g075200		Solyc03g065230	Solyc03g095270	Solyc05g008310	Solyc02g071380
Solyc04g078480	Solyc05g047680	Solyc04g053085	Solyc05g009540	Solyc09g090340		Solyc03g013610	Solyc03g095510	Solyc05g008520	Solyc02g071420
Solyc04g078840	Solyc05g050250	Solyc04g053140	Solyc05g009820	Solyc09g090870		Solyc03g013030	Solyc03g095710	Solyc05g008815	Solyc02g071540
Solyc04g078860	Solyc05g050740	Solyc04g053145	Solyc05g010160	Solyc09g090970		Solyc03g078075	Solyc03g095985	Solyc05g009820	Solyc02g071630
Solyc04g079050	Solyc05g050735	Solyc04g054700	Solyc05g010300	Solyc09g091725		Solyc03g078080	Solyc03g096070	Solyc05g010030	Solyc02g071860
Solyc04g079060	Solyc05g051060	Solyc04g054780	Solyc05g010620	Solyc09g091770		Solyc03g078120	Solyc03g096190	Solyc05g010340	Solyc02g071920
Solyc04g079260	Solyc05g051305	Solyc04g054820	Solyc05g010645	Solyc09g091920		Solyc03g078210	Solyc03g096360	Solyc05g010420	Solyc02g071990
Solyc04g079760	Solyc05g051660	Solyc04g055200	Solyc05g010790	Solyc09g092250		Solyc03g078780	Solyc03g096820	Solyc05g010790	Solyc02g072090
Solyc04g079770	Solyc05g051860	Solyc04g056290	Solyc05g010800	Solyc09g092470		Solyc03g079910	Solyc03g097110	Solyc05g012040	Solyc02g072350
Solyc04g079830	Solyc05g052270	Solyc04g056600	Solyc05g011900	Solyc10g005180		Solyc03g080030	Solyc03g097270	Solyc05g012210	Solyc02g072440
Solyc04g080140	Solyc05g052920	Solyc04g056730	Solyc05g013780	Solyc10g005340		Solyc03g082590	Solyc03g097460	Solyc05g012330	Solyc02g072500
Solyc04g080620	Solyc05g053860	Solyc04g056745	Solyc05g013820	Solyc10g005470		Solyc03g083070	Solyc03g097500	Solyc05g012350	Solyc02g072520
Solyc04g080650	Solyc05g053890	Solyc04g057997	Solyc05g014140	Solyc10g005760		Solyc03g083100	Solyc03g097670	Solyc05g012500	Solyc02g075620
Solyc04g080750	Solyc05g054040	Solyc04g058060	Solyc05g014440	Solyc10g007190		Solyc03g083170	Solyc03g097810	Solyc05g012780	Solyc02g076660
Solyc04g081170	Solyc05g054730	Solyc04g064540	Solyc05g014550	Solyc10g007640		Solyc03g083250	Solyc03g098000	Solyc05g012805	Solyc02g076780
Solyc04g081850	Solyc05g054750	Solyc04g064560	Solyc05g014637	Solyc10g007630		Solyc03g083665	Solyc03g098260	Solyc05g012950	Solyc02g076855
Solyc04g081910	Solyc05g054795	Solyc04g064600	Solyc05g015290	Solyc10g008680		Solyc03g083670	Solyc03g098770	Solyc05g013500	Solyc02g077120
Solyc04g082190	Solyc05g054840	Solyc04g064610	Solyc05g015490	Solyc10g008720		Solyc03g093040	Solyc03g019970	Solyc05g013690	Solyc02g077250
Solyc04g082500	Solyc05g055110	Solyc04g064630	Solyc05g016000	Solyc10g008750		Solyc03g093260	Solyc03g019960	Solyc05g013710	Solyc02g077300
Solyc04g082550	Solyc05g055580	Solyc04g064820	Solyc05g016330	Solyc10g008930		Solyc03g093640	Solyc03g019873	Solyc05g013790	Solyc02g077410
Solyc05g005080	Solyc05g055585	Solyc04g070960	Solyc05g017720	Solyc10g009610		Solyc03g093710	Solyc03g019720	Solyc05g015350	Solyc02g077575
Solyc05g005490	Solyc05g055830	Solyc04g070983	Solyc05g018320	Solyc10g011980		Solyc03g093720	Solyc03g111170	Solyc05g015490	Solyc02g077645
Solyc05g005865	Solyc06g005100	Solyc04g070985	Solyc05g018325	Solyc10g018817		Solyc03g093850	Solyc03g111830	Solyc05g015658	Solyc02g077680
Solyc05g006030	Solyc06g005470	Solyc04g071060	Solyc05g018520	Solyc10g033560		Solyc03g095750	Solyc03g112060	Solyc05g015843	Solyc02g078010
Solyc05g006040	Solyc06g005720	Solyc04g071300	Solyc05g018710	Solyc10g039380		Solyc03g095810	Solyc03g112090	Solyc05g015980	Solyc02g078015
Solyc05g006160	Solyc06g005760	Solyc04g071340	Solyc05g018800	Solyc10g062120		Solyc03g096070	Solyc03g113030	Solyc05g017860	Solyc02g078190
Solyc05g006470	Solyc06g005840	Solyc04g071540	Solyc05g018793	Solyc10g044640		Solyc03g096360	Solyc03g113220	Solyc05g050350	Solyc02g078200
Solyc05g006620	Solyc06g005850	Solyc04g071690	Solyc05g021480	Solyc10g044967		Solyc03g096380	Solyc03g113280	Solyc05g051290	Solyc02g078250
Solyc05g006780	Solyc06g006080	Solyc04g072050	Solyc05g021485	Solyc10g045390		Solyc03g096910	Solyc03g113290	Solyc05g051350	Solyc02g078370
Solyc05g007085	Solyc06g007165	Solyc04g072060	Solyc05g023720	Solyc10g046933		Solyc03g097150	Solyc03g113310	Solyc05g051425	Solyc02g078520
Solyc05g007270	Solyc06g007320	Solyc04g072240	Solyc05g023833	Solyc10g047530		Solyc03g097140	Solyc03g113620	Solyc05g051430	Solyc02g078540
Solyc05g008840	Solyc06g007550	Solyc04g072440	Solyc05g023857	Solyc10g049255		Solyc03g097470	Solyc03g113640	Solyc05g051590	Solyc02g078740
Solyc05g009640	Solyc06g007610	Solyc04g072850	Solyc05g024040	Solyc10g050460		Solyc03g097585	Solyc03g113940	Solyc05g051580	Solyc02g079000
Solyc05g009650	Solyc06g007770	Solyc04g074220	Solyc05g024340	Solyc10g050772		Solyc03g098200	Solyc03g114120	Solyc05g051660	Solyc02g079030
Solyc05g009660	Solyc06g007960	Solyc04g074250	Solyc05g024420	Solyc10g052745		Solyc03g098630	Solyc03g114150	Solyc05g051710	Solyc02g079290
Solyc05g009700	Solyc06g008200	Solyc04g074310	Solyc05g025550	Solyc10g053890		Solyc03g020020	Solyc03g114235	Solyc05g051800	Solyc02g079400
Solyc05g009820	Solyc06g008210	Solyc04g074330	Solyc05g025740	Solyc10g053910		Solyc03g019970	Solyc03g114270	Solyc05g051880	Solyc02g079410
Solyc05g009875	Solyc06g008220	Solyc04g074530	Solyc05g026570	Solyc10g054135		Solyc03g019870	Solyc03g114370	Solyc05g051920	Solyc02g079895
Solyc05g009980	Solyc06g008290	Solyc04g074590	Solyc05g032665	Solyc10g054210		Solyc03g111000	Solyc03g114580	Solyc05g052110	Solyc02g079960
Solyc05g009960	Solyc06g008500	Solyc04g074780	Solyc05g041500	Solyc10g055460		Solyc03g111010	Solyc03g114890	Solyc05g052160	Solyc02g080200
Solyc05g010030	Solyc06g008860	Solyc04g076080	Solyc05g041670	Solyc10g055580		Solyc03g111510	Solyc03g114940	Solyc05g052190	Solyc02g080220
Solyc05g010310	Solyc06g008960	Solyc04g076150	Solyc05g041920	Solyc10g055620		Solyc03g111570	Solyc03g115163	Solyc05g052460	Solyc02g080260
Solyc05g010363	Solyc06g009190	Solyc04g076303	Solyc05g042077	Solyc10g055670		Solyc03g111690	Solyc03g115850	Solyc05g052500	Solyc02g080370
Solyc05g010450	Solyc06g009510	Solyc04g076910	Solyc05g045730	Solyc10g074560		Solyc03g111830	Solyc03g115910	Solyc05g052530	Solyc02g080410
Solyc05g011880	Solyc06g009610	Solyc04g076940	Solyc05g045740	Solyc10g075150		Solyc03g111840	Solyc03g116230	Solyc05g052610	Solyc02g080530
Solyc05g012780	Solyc06g025425	Solyc04g077080	Solyc05g045850	Solyc10g078380		Solyc03g112010	Solyc03g116900	Solyc05g053070	Solyc02g080540
Solyc05g013280	Solyc06g033990	Solyc04g077615	Solyc05g045900	Solyc10g079470		Solyc03g113530	Solyc03g117430	Solyc05g053240	Solyc02g080780
Solyc05g013440	Solyc06g035490	Solyc04g077710	Solyc05g045930	Solyc10g081910		Solyc03g113970	Solyc03g117730	Solyc05g053340	Solyc02g080930
Solyc05g013820	Solyc06g035620	Solyc04g077940	Solyc05g045923	Solyc10g083890		Solyc03g114250	Solyc03g117970	Solyc05g053450	Solyc02g080970
Solyc05g014290	Solyc06g043036	Solyc04g078195	Solyc05g045980	Solyc10g084140		Solyc03g114690	Solyc03g118750	Solyc05g053700	Solyc02g081000
Solyc05g015410	Solyc06g050610	Solyc04g078210	Solyc05g046120	Solyc11g005130		Solyc03g115600	Solyc03g118770	Solyc05g053950	Solyc02g080995
Solyc05g015750	Solyc06g050630	Solyc04g078440	Solyc05g046270	Solyc11g006320		Solyc03g116010	Solyc03g119050	Solyc05g053965	Solyc02g081060
Solyc05g015820	Solyc06g050690	Solyc04g079030	Solyc05g047390	Solyc11g006590		Solyc03g116900	Solyc03g119060	Solyc05g054030	Solyc02g081080
Solyc05g016005	Solyc06g053640	Solyc04g079025	Solyc05g048830	Solyc11g008090		Solyc03g116930	Solyc03g119120	Solyc05g054760	Solyc02g081140
Solyc05g016440	Solyc06g053650	Solyc04g079210	Solyc05g049890	Solyc11g008660		Solyc03g116960	Solyc03g119720	Solyc06g005980	Solyc02g081200
Solyc05g018037	Solyc06g054180	Solyc04g079320	Solyc05g049900	Solyc11g010120		Solyc03g117260	Solyc03g120020	Solyc06g007500	Solyc02g081310
Solyc05g018300	Solyc06g060140	Solyc04g079370	Solyc05g050000	Solyc11g010130		Solyc03g117930	Solyc03g120030	Solyc06g007710	Solyc02g081340
Solyc05g018650	Solyc06g060190	Solyc04g079600	Solyc05g050100	Solyc11g010990		Solyc03g118260	Solyc03g120510	Solyc06g007850	Solyc02g081390
Solyc05g023660	Solyc06g060720	Solyc04g079800	Solyc05g050110	Solyc11g011300		Solyc03g118527	Solyc03g120760	Solyc06g007960	Solyc02g081430
Solyc05g023720	Solyc06g060790	Solyc04g079950	Solyc05g050160	Solyc11g011780		Solyc03g118530	Solyc03g120900	Solyc06g008300	Solyc02g081440
Solyc05g024373	Solyc06g061030	Solyc04g080140	Solyc05g050250	Solyc11g011800		Solyc03g119060	Solyc03g121440	Solyc06g008360	Solyc02g081600
Solyc05g025740	Solyc06g062300	Solyc04g080480	Solyc05g050790	Solyc11g012090		Solyc03g119470	Solyc03g122180	Solyc06g008790	Solyc02g081620
Solyc05g026080	Solyc06g062660	Solyc04g080710	Solyc05g050860	Solyc11g012330		Solyc03g119530	Solyc03g122260	Solyc06g009040	Solyc02g081680
Solyc05g026480	Solyc06g064580	Solyc04g080990	Solyc05g051060	Solyc11g012530		Solyc03g119650	Solyc03g122280	Solyc06g009200	Solyc02g081690
Solyc05g026490	Solyc06g064660	Solyc04g081650	Solyc05g051440	Solyc11g012560		Solyc03g119710	Solyc03g122340	Solyc06g009650	Solyc02g081860
Solyc05g032665	Solyc06g064750	Solyc04g081755	Solyc05g051490	Solyc11g013480		Solyc03g119760	Solyc03g123610	Solyc06g010033	Solyc02g081910
Solyc05g040100	Solyc06g064800	Solyc04g081770	Solyc05g051620	Solyc11g017430		Solyc03g120210	Solyc03g123660	Solyc06g010160	Solyc02g082110
Solyc05g041860	Solyc06g064830	Solyc04g081955	Solyc05g051660	Solyc11g018490		Solyc03g120520	Solyc03g123880	Solyc06g016770	Solyc02g082140
Solyc05g045750	Solyc06g065690	Solyc04g082230	Solyc05g052040	Solyc11g020345		Solyc03g120620	Solyc03g123950	Solyc06g018003	Solyc02g082430
Solyc05g047540	Solyc06g065750	Solyc05g005780	Solyc05g052240	Solyc11g021050		Solyc03g121010	Solyc04g005120	Solyc06g030570	Solyc02g082440
Solyc05g048810	Solyc06g065820	Solyc05g006210	Solyc05g052340	Solyc11g021365		Solyc03g121190	Solyc04g005430	Solyc06g033850	Solyc02g082720
Solyc05g051220	Solyc06g067920	Solyc05g006220	Solyc05g052490	Solyc11g027910		Solyc03g121440	Solyc04g005500	Solyc06g035580	Solyc02g082800
Solyc05g051490	Solyc06g067930	Solyc05g006870	Solyc05g052710	Solyc11g028310		Solyc03g121510	Solyc04g005560	Solyc06g035960	Solyc02g082840
Solyc05g051680	Solyc06g068990	Solyc05g007360	Solyc05g053160	Solyc11g028315		Solyc03g121770	Solyc04g005790	Solyc06g035970	Solyc02g083110
Solyc05g051820	Solyc06g069470	Solyc05g007380	Solyc05g053670	Solyc11g032133		Solyc03g121990	Solyc04g005900	Solyc06g036290	Solyc02g083440
Solyc05g051830	Solyc06g069565	Solyc05g007770	Solyc05g053770	Solyc11g033270		Solyc03g122260	Solyc04g005930	Solyc06g048600	Solyc02g083520
Solyc05g051870	Solyc06g071000	Solyc05g007890	Solyc05g053965	Solyc11g045527		Solyc03g122270	Solyc04g007360	Solyc06g048750	Solyc02g083590
Solyc05g053200	Solyc06g071140	Solyc05g008210	Solyc05g054010	Solyc11g044593		Solyc03g123610	Solyc04g007470	Solyc06g048870	Solyc02g083600
Solyc05g053500	Solyc06g071290	Solyc05g008260	Solyc05g054020	Solyc11g044270		Solyc03g123650	Solyc04g007480	Solyc06g050220	Solyc02g083620
Solyc05g053770	Solyc06g071500	Solyc05g008480	Solyc05g054120	Solyc11g043210		Solyc03g124040	Solyc04g007660	Solyc06g050315	Solyc02g083630
Solyc05g053920	Solyc06g072570	Solyc05g008770	Solyc05g054210	Solyc11g043120		Solyc04g005120	Solyc04g007780	Solyc06g050440	Solyc02g083730
Solyc05g054795	Solyc06g072640	Solyc05g008805	Solyc05g054390	Solyc11g042740		Solyc04g005300	Solyc04g008180	Solyc06g050570	Solyc02g083740
Solyc05g054840	Solyc06g072940	Solyc05g010207	Solyc05g054430	Solyc11g040221		Solyc04g005560	Solyc04g008310	Solyc06g051350	Solyc02g083860
Solyc05g055150	Solyc06g073190	Solyc05g010645	Solyc05g054610	Solyc11g040180		Solyc04g005590	Solyc04g008320	Solyc06g051460	Solyc02g083910
Solyc05g055270	Solyc06g073330	Solyc05g010650	Solyc05g054795	Solyc11g039810		Solyc04g007310	Solyc04g008530	Solyc06g051720	Solyc02g084005
Solyc05g055290	Solyc06g073585	Solyc05g011825	Solyc05g054860	Solyc11g039815		Solyc04g007320	Solyc04g008720	Solyc06g084760	Solyc02g084010
Solyc05g055567	Solyc06g073790	Solyc05g012030	Solyc05g054960	Solyc11g062020		Solyc04g007825	Solyc04g008910	Solyc06g084770	Solyc02g084030
Solyc05g055580	Solyc06g074030	Solyc05g012330	Solyc05g055400	Solyc11g062290		Solyc04g007900	Solyc04g009040	Solyc06g051980	Solyc02g084200
Solyc05g055585	Solyc06g074280	Solyc05g012500	Solyc05g055510	Solyc11g065160		Solyc04g007960	Solyc04g009230	Solyc06g052010	Solyc02g084210
Solyc05g055830	Solyc06g074320	Solyc05g013020	Solyc05g055980	Solyc11g065240		Solyc04g008010	Solyc04g009260	Solyc06g053360	Solyc02g084240
Solyc05g055910	Solyc06g074560	Solyc05g014140	Solyc05g056400	Solyc11g066580		Solyc04g008030	Solyc04g009440	Solyc06g053610	Solyc02g084270
Solyc05g055930	Solyc06g074600	Solyc05g014590	Solyc05g056545	Solyc11g067000		Solyc04g008220	Solyc04g009550	Solyc06g053650	Solyc02g084340
Solyc05g056290	Solyc06g075080	Solyc05g014637	Solyc05g056550	Solyc11g067355		Solyc04g008260	Solyc04g009820	Solyc06g054370	Solyc02g084640
Solyc05g056590	Solyc06g075090	Solyc05g015030	Solyc06g005230	Solyc11g068750		Solyc04g008320	Solyc04g009950	Solyc06g054625	Solyc02g084780
Solyc05g056595	Solyc06g075780	Solyc05g015260	Solyc06g005500	Solyc11g068760		Solyc04g008615	Solyc04g010000	Solyc06g054630	Solyc02g084790
Solyc06g005080	Solyc06g075970	Solyc05g015290	Solyc06g007190	Solyc11g069050		Solyc04g008640	Solyc04g011530	Solyc06g059760	Solyc02g084810
Solyc06g005350	Solyc06g076050	Solyc05g015535	Solyc06g007200	Solyc11g069290		Solyc04g009130	Solyc04g011570	Solyc06g059810	Solyc02g084820
Solyc06g005890	Solyc06g082030	Solyc05g015658	Solyc06g007700	Solyc11g069870		Solyc04g009260	Solyc04g011680	Solyc06g060580	Solyc02g084850
Solyc06g005950	Solyc06g082190	Solyc05g015795	Solyc06g008040	Solyc11g071290		Solyc04g009435	Solyc04g011790	Solyc06g060730	Solyc02g084940
Solyc06g007440	Solyc06g082430	Solyc05g015945	Solyc06g008320	Solyc11g071350		Solyc04g009590	Solyc04g011800	Solyc06g060820	Solyc02g084970
Solyc06g007650	Solyc06g082480	Solyc05g016030	Solyc06g008480	Solyc11g071450		Solyc04g009820	Solyc04g013200	Solyc06g060890	Solyc02g085330
Solyc06g007770	Solyc06g082500	Solyc05g016037	Solyc06g008490	Solyc11g072550		Solyc04g010070	Solyc04g014280	Solyc06g060990	Solyc02g085340
Solyc06g007960	Solyc06g082510	Solyc05g016195	Solyc06g008890	Solyc12g005200		Solyc04g011490	Solyc04g014300	Solyc06g061100	Solyc02g085420
Solyc06g007980	Solyc06g082630	Solyc05g016440	Solyc06g009380	Solyc12g005465		Solyc04g011500	Solyc04g014730	Solyc06g061250	Solyc02g085510
Solyc06g007990	Solyc06g082830	Solyc05g017745	Solyc06g009400	Solyc12g006160		Solyc04g011530	Solyc04g014760	Solyc06g062430	Solyc02g085700
Solyc06g008110	Solyc06g083270	Solyc05g017893	Solyc06g009610	Solyc12g007070		Solyc04g011720	Solyc04g014930	Solyc06g062690	Solyc02g085740
Solyc06g008200	Solyc06g083890	Solyc05g018300	Solyc06g009950	Solyc12g007150		Solyc04g011960	Solyc04g014997	Solyc06g063050	Solyc02g085910
Solyc06g008265	Solyc06g084090	Solyc05g018320	Solyc06g011350	Solyc12g007170		Solyc04g011990	Solyc04g015130	Solyc06g063345	Solyc02g086100
Solyc06g008330	Solyc06g084260	Solyc05g018325	Solyc06g018000	Solyc12g008640		Solyc04g013200	Solyc04g015160	Solyc06g064470	Solyc02g086150
Solyc06g008450	Solyc02g094770	Solyc05g018350	Solyc06g033830	Solyc12g009190		Solyc04g014260	Solyc04g015210	Solyc06g064525	Solyc02g086170
Solyc06g008560	Solyc07g005600	Solyc05g018410	Solyc06g035690	Solyc12g009920		Solyc04g014300	Solyc04g015260	Solyc06g064560	Solyc02g086230
Solyc06g009900	Solyc07g006110	Solyc05g018490	Solyc06g035790	Solyc12g013480		Solyc04g014370	Solyc04g015280	Solyc06g065180	Solyc02g086240
Solyc06g011370	Solyc07g006310	Solyc05g018500	Solyc06g035860	Solyc12g014130		Solyc04g014600	Solyc04g015350	Solyc06g065530	Solyc02g086290
Solyc06g011663	Solyc07g007110	Solyc05g018600	Solyc06g035900	Solyc12g014420		Solyc04g014650	Solyc04g015380	Solyc06g066690	Solyc02g086330
Solyc06g024375	Solyc07g007125	Solyc05g018650	Solyc06g035910	Solyc12g014450		Solyc04g014810	Solyc04g015510	Solyc06g068120	Solyc02g086360
Solyc06g017863	Solyc07g007300	Solyc05g021530	Solyc06g036040	Solyc12g017835		Solyc04g014820	Solyc04g015610	Solyc06g068430	Solyc02g086560
Solyc06g018004	Solyc07g007340	Solyc05g023720	Solyc06g036050	Solyc12g019080		Solyc04g014960	Solyc04g015710	Solyc06g068435	Solyc02g086630
Solyc06g019150	Solyc07g007430	Solyc05g023833	Solyc06g036290	Solyc12g019144		Solyc04g015060	Solyc04g015850	Solyc06g068470	Solyc02g086683
Solyc06g030650	Solyc07g007550	Solyc05g024340	Solyc06g036470	Solyc12g021170		Solyc04g015260	Solyc04g016210	Solyc06g068540	Solyc02g086690
Solyc06g034150	Solyc07g007760	Solyc05g024420	Solyc06g036680	Solyc12g021340		Solyc04g015300	Solyc04g016330	Solyc06g068640	Solyc02g086710
Solyc06g034160	Solyc07g007980	Solyc05g025740	Solyc06g036890	Solyc12g077660		Solyc04g015380	Solyc04g016380	Solyc06g069430	Solyc02g086795
Solyc06g035520	Solyc07g008095	Solyc05g032665	Solyc06g043150	Solyc12g027580		Solyc04g015470	Solyc04g016390	Solyc06g069440	Solyc02g086830
Solyc06g035620	Solyc07g008250	Solyc05g040020	Solyc06g048470	Solyc12g027730		Solyc04g015620	Solyc04g016470	Solyc06g070960	Solyc02g086970
Solyc06g035860	Solyc07g008500	Solyc05g041400	Solyc06g048950	Solyc12g070100		Solyc04g015690	Solyc04g017690	Solyc06g071100	Solyc02g087050
Solyc06g035920	Solyc07g008570	Solyc05g041530	Solyc06g048960	Solyc12g070152		Solyc04g015850	Solyc04g017750	Solyc06g071080	Solyc02g087060
Solyc06g036463	Solyc07g008780	Solyc05g041540	Solyc06g049060	Solyc12g062790		Solyc04g015950	Solyc04g040140	Solyc06g071780	Solyc02g087330
Solyc06g043020	Solyc07g009235	Solyc05g041570	Solyc06g050360	Solyc12g062737		Solyc04g016010	Solyc04g039990	Solyc06g071830	Solyc02g087870
Solyc06g042954	Solyc07g009560	Solyc05g041590	Solyc06g050370	Solyc12g035500		Solyc04g016050	Solyc04g040000	Solyc06g071925	Solyc02g088020
Solyc06g048750	Solyc07g015820	Solyc05g041660	Solyc06g050510	Solyc12g035522		Solyc04g016130	Solyc04g039790	Solyc06g071970	Solyc02g088030
Solyc06g051350	Solyc07g017780	Solyc05g042077	Solyc06g050700	Solyc12g036390		Solyc04g016160	Solyc04g039770	Solyc06g072130	Solyc02g088140
Solyc06g051520	Solyc07g018405	Solyc05g043445	Solyc06g050730	Solyc12g036520		Solyc04g016177	Solyc04g039780	Solyc06g072360	Solyc02g088570
Solyc06g051820	Solyc07g019505	Solyc05g044465	Solyc06g051045	Solyc12g038510		Solyc04g016370	Solyc04g039760	Solyc06g072440	Solyc02g088780
Solyc06g053650	Solyc07g019520	Solyc05g045710	Solyc06g051130	Solyc12g040860		Solyc04g016550	Solyc04g026040	Solyc06g072550	Solyc02g089200
Solyc06g053750	Solyc07g019550	Solyc05g045730	Solyc06g051440	Solyc12g042980		Solyc04g017620	Solyc04g025340	Solyc06g073380	Solyc02g089270
Solyc06g053810	Solyc07g019650	Solyc05g045740	Solyc06g051460	Solyc12g043050		Solyc04g016590	Solyc04g045540	Solyc06g073780	Solyc02g089310
Solyc06g054370	Solyc07g021405	Solyc05g045750	Solyc06g052110	Solyc12g043150		Solyc04g017750	Solyc04g047680	Solyc06g074180	Solyc02g089490
Solyc06g060010	Solyc07g024020	Solyc05g045900	Solyc06g053140	Solyc12g044200		Solyc04g040165	Solyc04g049170	Solyc06g074310	Solyc02g089650
Solyc06g060120	Solyc07g024070	Solyc05g045920	Solyc06g053190	Solyc12g044520		Solyc04g040140	Solyc04g049330	Solyc06g074390	Solyc02g089680
Solyc06g060180	Solyc07g025290	Solyc05g046013	Solyc06g053980	Solyc12g044653		Solyc04g039790	Solyc04g049610	Solyc06g074700	Solyc02g089860
Solyc06g060270	Solyc07g032420	Solyc05g046030	Solyc06g053990	Solyc12g049190		Solyc04g039770	Solyc04g050340	Solyc06g075345	Solyc02g089930
Solyc06g060370	Solyc07g041170	Solyc05g046133	Solyc06g054240	Solyc12g049390		Solyc04g039780	Solyc04g050365	Solyc06g075470	Solyc02g090020
Solyc06g060820	Solyc07g041623	Solyc05g046270	Solyc06g054270	Solyc12g049613		Solyc04g039760	Solyc04g050622	Solyc06g075830	Solyc02g090100
Solyc06g060940	Solyc07g041680	Solyc05g046290	Solyc06g054410	Solyc12g056440		Solyc04g039675	Solyc04g050800	Solyc06g076660	Solyc02g090135
Solyc06g060960		Solyc05g047580	Solyc06g054625	Solyc12g088060		Solyc04g026350	Solyc04g050840	Solyc06g076910	Solyc02g090290
Solyc06g061030		Solyc05g047670	Solyc06g060210	Solyc12g088070		Solyc04g026040	Solyc04g051190	Solyc06g082170	Solyc02g090360
Solyc06g061250		Solyc05g047714	Solyc06g060290	Solyc12g088220		Solyc04g025930	Solyc04g051210	Solyc06g082260	Solyc02g090370
Solyc06g062430		Solyc05g048850	Solyc06g060440	Solyc12g089240		Solyc04g025650	Solyc04g051230	Solyc06g082270	Solyc02g090430
Solyc06g062660		Solyc05g050000	Solyc06g062300	Solyc12g094440		Solyc04g025540	Solyc04g051480	Solyc06g083580	Solyc02g090630
Solyc06g062970		Solyc05g050100	Solyc06g062360	Solyc12g094630		Solyc04g025477	Solyc04g051710	Solyc07g005110	Solyc02g090720
Solyc06g063430		Solyc05g050110	Solyc06g062420	Solyc12g096580		Solyc04g025320	Solyc04g052890	Solyc07g005390	Solyc02g090760
Solyc06g064450		Solyc05g050160	Solyc06g062580	Solyc12g096640		Solyc04g025290	Solyc04g052960	Solyc07g005650	Solyc02g090790
Solyc06g064620		Solyc05g050770	Solyc06g062690	Solyc12g096880		Solyc04g025260	Solyc04g054220	Solyc07g006160	Solyc02g090850
Solyc06g065730		Solyc05g050790	Solyc06g062700	Solyc12g098620		Solyc04g024885	Solyc04g056290	Solyc07g006280	Solyc02g090960
Solyc06g068840		Solyc05g050850	Solyc06g062800	Solyc12g098650		Solyc04g024590	Solyc04g056500	Solyc07g006610	Solyc02g091100
Solyc06g069850		Solyc05g050860	Solyc06g062805	Solyc12g098660		Solyc04g024580	Solyc04g056503	Solyc07g006780	Solyc02g091120
Solyc06g071140		Solyc05g051590	Solyc06g063200	Solyc12g098910		Solyc04g024540	Solyc04g056520	Solyc07g006850	Solyc02g091130
Solyc06g071250		Solyc05g051640	Solyc06g064670	Solyc12g099120		Solyc04g024530	Solyc04g056600	Solyc07g006855	Solyc02g091250
Solyc06g071440		Solyc05g051790	Solyc06g065830	Solyc12g099430		Solyc04g024340	Solyc04g057850	Solyc07g006900	Solyc02g091345
Solyc06g072320		Solyc05g052100	Solyc06g065840			Solyc04g045340	Solyc04g058065	Solyc07g007140	Solyc02g091350
Solyc06g072620		Solyc05g052110	Solyc06g066060			Solyc04g045470	Solyc04g058160	Solyc07g007250	Solyc02g091410
Solyc06g072940		Solyc05g052830	Solyc06g066580			Solyc04g045650	Solyc04g064510	Solyc07g007280	Solyc02g091430
Solyc06g073140		Solyc05g053130	Solyc06g067890			Solyc04g045660	Solyc04g071300	Solyc07g008210	Solyc02g091510
Solyc06g073160		Solyc05g053340	Solyc06g068090			Solyc04g047690	Solyc04g071310	Solyc07g008390	Solyc02g091520
Solyc06g073580		Solyc05g053620	Solyc06g068350			Solyc04g047750	Solyc04g071500	Solyc07g008550	Solyc02g091550
Solyc06g073780		Solyc05g053670	Solyc06g068420			Solyc04g049010	Solyc04g071520	Solyc07g008560	Solyc02g091650
Solyc06g073840		Solyc05g053770	Solyc06g069000			Solyc04g049130	Solyc04g071660	Solyc07g008570	Solyc02g091670
Solyc06g073960		Solyc05g053800	Solyc06g069100			Solyc04g049140	Solyc04g072235	Solyc07g008825	Solyc02g091690
Solyc06g074120		Solyc05g053870	Solyc06g069190			Solyc04g049170	Solyc04g072265	Solyc07g009320	Solyc02g091730
Solyc06g074650		Solyc05g053965	Solyc06g071390			Solyc04g049260	Solyc04g072290	Solyc07g014640	Solyc02g091820
Solyc06g075090		Solyc05g054030	Solyc06g071610			Solyc04g049290	Solyc04g072530	Solyc07g014690	Solyc02g092010
Solyc06g075140		Solyc05g054110	Solyc06g071780			Solyc04g049610	Solyc04g072620	Solyc07g015910	Solyc02g092050
Solyc06g075520		Solyc05g054230	Solyc06g071880			Solyc04g049910	Solyc04g072630	Solyc07g015985	Solyc02g092120
Solyc06g075513		Solyc05g054430	Solyc06g071890			Solyc04g050260	Solyc04g072707	Solyc07g017410	Solyc02g092380
Solyc06g075830		Solyc05g054620	Solyc06g071930			Solyc04g050490	Solyc04g072815	Solyc07g017950	Solyc02g092390
Solyc06g076130		Solyc05g054640	Solyc06g072370			Solyc04g050576	Solyc04g072860	Solyc07g019650	Solyc02g092430
Solyc06g076980		Solyc05g055000	Solyc06g072420			Solyc04g050621	Solyc04g074240	Solyc07g025390	Solyc02g092480
Solyc06g082420		Solyc05g055290	Solyc06g072440			Solyc04g050800	Solyc04g074250	Solyc07g025520	Solyc02g092560
Solyc06g083415		Solyc05g055400	Solyc06g072465			Solyc04g050840	Solyc04g074740	Solyc07g026675	Solyc02g092580
Solyc06g083500		Solyc05g055420	Solyc06g072550			Solyc04g050850	Solyc04g074760	Solyc07g032380	Solyc02g092700
Solyc06g083890		Solyc05g055490	Solyc06g073110			Solyc04g051097	Solyc04g074780	Solyc07g038100	Solyc02g092760
Solyc06g084530		Solyc05g055620	Solyc06g073137			Solyc04g051120	Solyc04g076080	Solyc07g039195	Solyc02g092770
Solyc06g084590		Solyc05g056385	Solyc06g074390			Solyc04g051190	Solyc04g076150	Solyc07g040685	Solyc02g092810
Solyc07g004997		Solyc06g005080	Solyc06g075760			Solyc04g051360	Solyc04g076660	Solyc07g040980	Solyc02g092910
Solyc07g005420		Solyc06g005180	Solyc06g075960			Solyc04g051400	Solyc04g076710	Solyc07g041180	Solyc02g093110
Solyc07g005610		Solyc06g005580	Solyc06g076330			Solyc04g051410	Solyc04g076820	Solyc07g041200	Solyc02g093180
Solyc07g005630		Solyc06g007170	Solyc06g076400			Solyc04g051490	Solyc04g076880	Solyc04g048940	Solyc02g093330
Solyc07g006690		Solyc06g007590	Solyc06g076540			Solyc04g051570	Solyc04g077210	Solyc07g041930	Solyc02g093770
Solyc07g006750		Solyc06g007990	Solyc06g076690			Solyc04g051680	Solyc04g077640	Solyc07g042100	Solyc02g093880
Solyc07g007040		Solyc06g008300	Solyc06g076760			Solyc04g051700	Solyc04g077710	Solyc07g042313	Solyc02g093935
Solyc07g007140		Solyc06g008530	Solyc06g076840			Solyc04g051830	Solyc04g077880	Solyc07g042380	Solyc02g094110
Solyc07g007300		Solyc06g008560	Solyc06g082080			Solyc04g053140	Solyc04g078120	Solyc07g042880	Solyc02g094130
Solyc07g007980		Solyc06g008790	Solyc06g082860			Solyc04g053145	Solyc04g078180	Solyc07g043000	Solyc02g094170
Solyc07g008095		Solyc06g008880	Solyc06g083140			Solyc04g054700	Solyc04g078490	Solyc07g043133	Solyc02g094270
Solyc07g008160		Solyc06g009140	Solyc06g083570			Solyc04g054780	Solyc04g078520	Solyc07g043230	Solyc02g094435
Solyc07g008170		Solyc06g009680	Solyc06g083580			Solyc04g054820	Solyc04g078550	Solyc07g043710	Solyc02g094510
Solyc07g008210		Solyc06g018000	Solyc06g083640			Solyc04g054990	Solyc04g078620	Solyc07g045000	Solyc02g094635
Solyc07g008200		Solyc06g018003	Solyc06g083770			Solyc04g056290	Solyc04g079025	Solyc07g045040	Solyc03g005010
Solyc07g008520		Solyc06g030490	Solyc06g083780			Solyc04g056450	Solyc04g079370	Solyc07g045340	Solyc03g005140
Solyc07g008940		Solyc06g030540	Solyc06g084260			Solyc04g056580	Solyc04g079420	Solyc07g047910	Solyc03g005430
Solyc07g009235		Solyc06g030590	Solyc06g084570			Solyc04g056600	Solyc04g079800	Solyc07g047920	Solyc03g005550
Solyc07g009520		Solyc06g033820	Solyc07g006310			Solyc04g056730	Solyc04g079830	Solyc07g048020	Solyc03g005570
Solyc07g009560		Solyc06g033920	Solyc07g006650			Solyc04g056748	Solyc04g079880	Solyc07g049160	Solyc03g005630
Solyc07g014740		Solyc06g035860	Solyc07g007110			Solyc04g057960	Solyc04g080120	Solyc07g049210	Solyc03g005640
Solyc07g015840		Solyc06g035920	Solyc07g007125			Solyc04g057997	Solyc04g080220	Solyc07g049470	Solyc03g005740
Solyc07g015940		Solyc06g035943	Solyc07g007590			Solyc04g058060	Solyc04g080230	Solyc07g049670	Solyc03g005870
Solyc07g017330		Solyc06g035960	Solyc07g007630			Solyc04g063370	Solyc04g080320	Solyc07g049690	Solyc03g005920
Solyc07g017500		Solyc06g036290	Solyc07g008320			Solyc04g064480	Solyc04g080540	Solyc07g052110	Solyc03g006070
Solyc07g017870		Solyc06g036470	Solyc07g008350			Solyc04g064540	Solyc04g080550	Solyc07g052230	Solyc03g006080
Solyc07g017950		Solyc06g036600	Solyc07g008990			Solyc04g064560	Solyc04g081000	Solyc07g052340	Solyc03g006090
Solyc07g019510		Solyc06g036680	Solyc07g009000			Solyc04g064610	Solyc04g081180	Solyc07g052410	Solyc03g006260
Solyc07g019650		Solyc06g036780	Solyc07g009030			Solyc04g064630	Solyc04g081640	Solyc07g052453	Solyc03g006500
Solyc07g021020		Solyc06g043150	Solyc07g009290			Solyc04g064700	Solyc04g082530	Solyc07g052470	Solyc03g006600
Solyc07g021405		Solyc06g043032	Solyc07g009330			Solyc04g064820	Solyc04g082990	Solyc07g052630	Solyc03g006610
Solyc07g021510		Solyc06g048450	Solyc07g009337			Solyc04g070960	Solyc05g005140	Solyc07g052640	Solyc03g006770
Solyc07g022860		Solyc06g050180	Solyc07g009520			Solyc04g071300	Solyc05g005450	Solyc07g052690	Solyc03g006830
Solyc07g024020		Solyc06g050220	Solyc07g009575			Solyc04g071340	Solyc05g005535	Solyc07g053100	Solyc03g006840
Solyc07g024070		Solyc06g050315	Solyc07g014580			Solyc04g071540	Solyc05g006040	Solyc07g053200	Solyc03g006910
Solyc07g025490		Solyc06g050340	Solyc07g014640			Solyc04g071690	Solyc05g006215	Solyc07g053450	Solyc03g006930
Solyc07g032260		Solyc06g050460	Solyc07g014750			Solyc04g072050	Solyc05g006230	Solyc07g053460	Solyc03g006960
Solyc07g032615		Solyc06g050820	Solyc07g016095			Solyc04g072060	Solyc05g006460	Solyc07g053495	Solyc03g006980
Solyc07g032620		Solyc06g051440	Solyc07g018250			Solyc04g072130	Solyc05g006603	Solyc07g053700	Solyc03g007100
Solyc07g039295		Solyc06g051520	Solyc07g018300			Solyc04g072265	Solyc05g006670	Solyc07g054140	Solyc03g007140
Solyc07g039570		Solyc06g084760	Solyc07g018380			Solyc04g072440	Solyc05g006837	Solyc07g054145	Solyc03g007260
Solyc07g039625		Solyc06g084770	Solyc07g019550			Solyc04g072490	Solyc05g007085	Solyc07g054900	Solyc03g007430
Solyc07g040745		Solyc06g052000	Solyc07g020730			Solyc04g072707	Solyc05g007260	Solyc07g055730	Solyc03g007480
Solyc07g040780		Solyc06g052010	Solyc07g024020			Solyc04g072850	Solyc05g007380	Solyc07g055780	Solyc03g007510
Solyc07g040980		Solyc06g052140	Solyc07g026710			Solyc04g072910	Solyc05g007490	Solyc07g055840	Solyc03g007580
Solyc07g041010		Solyc06g053630	Solyc07g032420			Solyc04g074190	Solyc05g007550	Solyc07g056230	Solyc03g007810
Solyc07g041020		Solyc06g053930	Solyc07g032430			Solyc04g074220	Solyc05g007720	Solyc07g056703	Solyc03g007870
Solyc07g041300		Solyc06g053970	Solyc07g032794			Solyc04g074250	Solyc05g007770	Solyc07g061750	Solyc03g007920
Solyc07g042105		Solyc06g054240	Solyc07g039580			Solyc04g074310	Solyc05g007880	Solyc07g061760	Solyc03g025150
Solyc07g042160		Solyc06g059930	Solyc07g040950			Solyc04g074330	Solyc05g007900	Solyc07g061980	Solyc03g025210
Solyc07g042313		Solyc06g059970	Solyc07g041180			Solyc04g074530	Solyc05g007910	Solyc07g062230	Solyc03g025455
		Solyc06g060090	Solyc07g041245			Solyc04g074550	Solyc05g008060	Solyc07g062320	Solyc03g025500
		Solyc06g060120	Solyc07g041430			Solyc04g074590	Solyc05g008070	Solyc07g062340	Solyc03g025680
		Solyc06g060590	Solyc07g041490			Solyc04g074780	Solyc05g008210	Solyc07g062350	Solyc03g025830
		Solyc06g060890	Solyc07g041515			Solyc04g076080	Solyc05g008260	Solyc07g062550	Solyc03g025920
		Solyc06g060960	Solyc07g041820			Solyc04g076150	Solyc05g008320	Solyc07g062570	Solyc03g026170
		Solyc06g061270	Solyc07g041830			Solyc04g076550	Solyc05g008485	Solyc07g062685	Solyc03g026350
		Solyc06g062280	Solyc07g041890			Solyc04g076580	Solyc05g008560	Solyc07g063000	Solyc03g031600
		Solyc06g062420	Solyc07g041930			Solyc04g076910	Solyc05g008600	Solyc07g063165	Solyc03g031820
		Solyc06g063085	Solyc07g042300			Solyc04g076940	Solyc05g008610	Solyc07g063180	Solyc03g031880
		Solyc06g064590				Solyc04g077410	Solyc05g008660	Solyc07g063490	Solyc03g031910
		Solyc06g065360				Solyc04g077615	Solyc05g008690	Solyc07g063650	Solyc03g031950
		Solyc06g065600				Solyc04g077710	Solyc05g009440	Solyc07g063735	Solyc03g031970
		Solyc06g066360				Solyc04g077940	Solyc05g009480	Solyc07g064120	Solyc03g032100
		Solyc06g066580				Solyc04g078050	Solyc05g009520	Solyc07g064300	Solyc03g032140
		Solyc06g066690				Solyc04g078180	Solyc05g009650	Solyc07g064730	Solyc03g032160
		Solyc06g066790				Solyc04g078195	Solyc05g009700	Solyc07g065470	Solyc03g033330
		Solyc06g066820				Solyc04g078210	Solyc05g009720	Solyc07g066000	Solyc03g033510
		Solyc06g066830				Solyc04g078480	Solyc05g009750	Solyc07g066130	Solyc03g033520
		Solyc06g067870				Solyc04g079030	Solyc05g009820	Solyc07g066480	Solyc03g033560
		Solyc06g067930				Solyc04g079025	Solyc05g009970	Solyc07g066610	Solyc03g033695
		Solyc06g068420				Solyc04g079050	Solyc05g010160	Solyc08g005312	Solyc03g034140
		Solyc06g068470				Solyc04g079060	Solyc05g010300	Solyc08g005680	Solyc03g034170
		Solyc06g068500				Solyc04g079210	Solyc05g010620	Solyc08g005720	Solyc03g034270
		Solyc06g068680				Solyc04g079260	Solyc05g010645	Solyc08g006000	Solyc03g034320
		Solyc06g068840				Solyc04g079320	Solyc05g010790	Solyc08g006320	Solyc03g034330
		Solyc06g069100				Solyc04g079370	Solyc05g010800	Solyc08g006500	Solyc03g043700
		Solyc06g069110				Solyc04g079600	Solyc05g011900	Solyc08g007080	Solyc03g043850
		Solyc06g069120				Solyc04g079760	Solyc05g012120	Solyc08g007420	Solyc03g043950
		Solyc06g071250				Solyc04g079770	Solyc05g012150	Solyc08g007460	Solyc03g044060
		Solyc06g071780				Solyc04g079800	Solyc05g012280	Solyc08g007800	Solyc03g044190
		Solyc06g072440				Solyc04g079830	Solyc05g012620	Solyc08g008010	Solyc03g044600
		Solyc06g072720				Solyc04g079950	Solyc05g012820	Solyc08g008330	Solyc03g044660
		Solyc06g073140				Solyc04g080140	Solyc05g013430	Solyc08g008340	Solyc03g044720
		Solyc06g073160				Solyc04g080480	Solyc05g013480	Solyc08g008390	Solyc03g044790
		Solyc06g073780				Solyc04g080620	Solyc05g013580	Solyc08g008420	Solyc03g045060
		Solyc06g073820				Solyc04g080650	Solyc05g014050	Solyc08g008630	Solyc03g045090
		Solyc06g073840				Solyc04g080710	Solyc05g014120	Solyc08g013730	Solyc03g046440
		Solyc06g073920				Solyc04g080750	Solyc05g014140	Solyc08g013970	Solyc03g070380
		Solyc06g074320				Solyc04g080990	Solyc05g014440	Solyc08g013990	Solyc03g070390
		Solyc06g074400				Solyc04g081170	Solyc05g014550	Solyc08g014230	Solyc03g071570
		Solyc06g075070				Solyc04g081650	Solyc05g014620	Solyc08g014240	Solyc03g071590
		Solyc06g075100				Solyc04g081755	Solyc05g014637	Solyc08g014247	Solyc03g051790
		Solyc06g075650				Solyc04g081770	Solyc05g015290	Solyc08g014300	Solyc03g053110
		Solyc06g076330				Solyc04g081850	Solyc05g015490	Solyc08g014330	Solyc03g058160
		Solyc06g082420				Solyc04g081910	Solyc05g018320	Solyc08g048520	Solyc03g059490
		Solyc06g082860				Solyc04g082190	Solyc05g018325	Solyc08g043180	Solyc03g063030
		Solyc06g083490				Solyc04g082230	Solyc05g018520	Solyc08g042143	Solyc03g063053
		Solyc06g083500				Solyc04g082500	Solyc05g018710	Solyc08g023465	Solyc03g063060
		Solyc06g083580				Solyc04g082550	Solyc05g018800	Solyc08g029000	Solyc03g063110
		Solyc06g084530				Solyc05g005080	Solyc05g018793	Solyc08g060970	Solyc03g063200
		Solyc06g084570				Solyc05g005490	Solyc05g023720	Solyc08g061240	Solyc03g063560
		Solyc06g084628				Solyc05g005865	Solyc05g023833	Solyc08g061323	Solyc03g063720
		Solyc07g005350				Solyc05g006030	Solyc05g023857	Solyc08g062920	Solyc03g063730
		Solyc07g005650				Solyc05g006040	Solyc05g023950	Solyc08g065420	Solyc03g063760
		Solyc07g006035				Solyc05g006160	Solyc05g024040	Solyc08g065830	Solyc03g064010
		Solyc07g006300				Solyc05g006220	Solyc05g024180	Solyc08g066100	Solyc03g065250
		Solyc07g006520				Solyc05g006470	Solyc05g024173	Solyc08g066350	Solyc03g065340
		Solyc07g006690				Solyc05g006620	Solyc05g024177	Solyc08g066690	Solyc03g078100
		Solyc07g006855				Solyc05g006780	Solyc05g024340	Solyc08g066680	Solyc03g078290
		Solyc07g006900				Solyc05g006870	Solyc05g024360	Solyc08g067060	Solyc03g078300
		Solyc07g007140				Solyc05g007085	Solyc05g024420	Solyc08g067605	Solyc03g078360
		Solyc07g007500				Solyc05g007270	Solyc05g025740	Solyc08g067770	Solyc03g078500
		Solyc07g007550				Solyc05g007380	Solyc05g026007	Solyc08g067930	Solyc03g078600
		Solyc07g008095				Solyc05g007770	Solyc05g026490	Solyc08g068150	Solyc03g078650
		Solyc07g008360				Solyc05g007890	Solyc05g026570	Solyc08g068250	Solyc03g079910
		Solyc07g008410				Solyc05g008210	Solyc05g041500	Solyc08g068370	Solyc03g080100
		Solyc07g008560				Solyc05g008260	Solyc05g041670	Solyc08g068385	Solyc03g080190
		Solyc07g008710				Solyc05g008480	Solyc05g041920	Solyc08g068850	Solyc03g081320
		Solyc07g008990				Solyc05g008770	Solyc05g041990	Solyc08g069180	Solyc03g082510
		Solyc07g009130				Solyc05g008805	Solyc05g043270	Solyc08g074390	Solyc03g082670
		Solyc07g009330				Solyc05g009640	Solyc05g043234	Solyc08g074410	Solyc03g082685
		Solyc07g009580				Solyc05g009650	Solyc05g045730	Solyc08g074830	Solyc03g082700
		Solyc07g009575				Solyc05g009660	Solyc05g045740	Solyc08g074960	Solyc03g082710
		Solyc07g014680				Solyc05g009820	Solyc05g045850	Solyc08g075240	Solyc03g082840
		Solyc07g015810				Solyc05g009980	Solyc05g045900	Solyc08g075470	Solyc03g083010
		Solyc07g015910				Solyc05g009960	Solyc05g045930	Solyc08g075550	Solyc03g083120
		Solyc07g016080				Solyc05g010207	Solyc05g045923	Solyc08g075710	Solyc03g083270
		Solyc07g016095				Solyc05g010310	Solyc05g045980	Solyc08g075930	Solyc03g083280
		Solyc07g017510				Solyc05g010450	Solyc05g046120	Solyc08g076500	Solyc03g083470
		Solyc07g017733				Solyc05g010645	Solyc05g046270	Solyc08g076645	Solyc03g083480
		Solyc07g017990				Solyc05g010650	Solyc05g047550	Solyc08g076720	Solyc03g083560
		Solyc07g018140				Solyc05g011825	Solyc05g047615	Solyc08g076810	Solyc03g083720
		Solyc07g018144				Solyc05g011880	Solyc05g047680	Solyc08g076790	Solyc03g093450
		Solyc07g018350				Solyc05g012030	Solyc05g049890	Solyc08g077070	Solyc03g093470
		Solyc07g018380				Solyc05g012330	Solyc05g049900	Solyc08g077300	Solyc03g093550
		Solyc07g018387				Solyc05g012780	Solyc05g050160	Solyc08g077310	Solyc03g093820
		Solyc07g020920				Solyc05g013020	Solyc05g050250	Solyc08g078087	Solyc03g093830
		Solyc07g021467				Solyc05g013280	Solyc05g050740	Solyc08g078890	Solyc03g093880
		Solyc07g021490				Solyc05g013440	Solyc05g050735	Solyc08g079480	Solyc03g093940
		Solyc07g022790				Solyc05g014140	Solyc05g050790	Solyc08g080100	Solyc03g094020
		Solyc07g024020				Solyc05g014590	Solyc05g050860	Solyc08g080140	Solyc03g094120
		Solyc07g026710				Solyc05g014637	Solyc05g051060	Solyc08g080520	Solyc03g094160
		Solyc07g026860				Solyc05g015030	Solyc05g051305	Solyc08g080990	Solyc03g095490
		Solyc07g032020				Solyc05g015260	Solyc05g051440	Solyc08g081010	Solyc03g095510
		Solyc07g032220				Solyc05g015290	Solyc05g051490	Solyc08g081820	Solyc03g095620
		Solyc07g032420				Solyc05g015535	Solyc05g051660	Solyc08g082200	Solyc03g095650
		Solyc07g032794				Solyc05g015658	Solyc05g051860	Solyc08g082310	Solyc03g095710
		Solyc07g039450				Solyc05g015750	Solyc05g052240	Solyc08g082780	Solyc03g095770
		Solyc07g039665				Solyc05g015795	Solyc05g052340	Solyc09g007170	Solyc03g095980
		Solyc07g040780				Solyc05g015820	Solyc05g052490	Solyc09g007920	Solyc03g096000
		Solyc07g041023				Solyc05g015945	Solyc05g052710	Solyc09g007930	Solyc03g096197
		Solyc07g041180				Solyc05g016005	Solyc05g052920	Solyc09g008050	Solyc03g096380
		Solyc04g048940				Solyc05g016030	Solyc05g053160	Solyc09g008295	Solyc03g096650
		Solyc07g041280				Solyc05g016037	Solyc05g053860	Solyc09g008360	Solyc03g096740
		Solyc07g041430				Solyc05g016440	Solyc05g053890	Solyc09g008380	Solyc03g096790
		Solyc07g041470				Solyc05g017745	Solyc05g053965	Solyc09g008490	Solyc03g096810
		Solyc07g041510				Solyc05g018037	Solyc05g054010	Solyc09g008790	Solyc03g096820
		Solyc07g041515				Solyc05g018320	Solyc05g054020	Solyc09g009200	Solyc03g096935
		Solyc07g041750				Solyc05g018325	Solyc05g054040	Solyc09g009290	Solyc03g096940
		Solyc07g042160				Solyc05g018350	Solyc05g054120	Solyc09g009490	Solyc03g096960
		Solyc07g042190				Solyc05g018490	Solyc05g054390	Solyc09g009520	Solyc03g096965
						Solyc05g018500	Solyc05g054430	Solyc09g009560	Solyc03g096980
						Solyc05g023720	Solyc05g054610	Solyc09g009610	Solyc03g097010
						Solyc05g023833	Solyc05g054750	Solyc09g009700	Solyc03g097130
						Solyc05g024420	Solyc05g054795	Solyc09g009830	Solyc03g097270
						Solyc05g025740	Solyc05g054840	Solyc09g009985	Solyc03g097310
						Solyc05g026080	Solyc05g054860	Solyc09g010350	Solyc03g097360
						Solyc05g026480	Solyc05g054960	Solyc09g011010	Solyc03g097370
						Solyc05g026490	Solyc05g055110	Solyc09g011020	Solyc03g097420
						Solyc05g032665	Solyc05g055400	Solyc09g011260	Solyc03g097460
						Solyc05g041400	Solyc05g055510	Solyc09g011560	Solyc03g097470
						Solyc05g041540	Solyc05g055580	Solyc09g011570	Solyc03g097490
						Solyc05g041660	Solyc05g055585	Solyc09g011580	Solyc03g097630
						Solyc05g041860	Solyc05g055830	Solyc09g011660	Solyc03g097675
						Solyc05g043445	Solyc05g055980	Solyc09g011740	Solyc03g097710
						Solyc05g044465	Solyc05g056400	Solyc09g011890	Solyc03g097715
						Solyc05g045710	Solyc05g056550	Solyc09g014620	Solyc03g097730
						Solyc05g045730	Solyc06g005100	Solyc09g014837	Solyc03g097910
						Solyc05g045740	Solyc06g005470	Solyc09g014860	Solyc03g097980
						Solyc05g045750	Solyc06g005500	Solyc09g015080	Solyc03g097990
						Solyc05g045900	Solyc06g005720	Solyc09g015120	Solyc03g098030
						Solyc05g045920	Solyc06g005760	Solyc09g018170	Solyc03g098090
						Solyc05g046013	Solyc06g005840	Solyc09g018180	Solyc03g098260
						Solyc05g046030	Solyc06g005850	Solyc09g018430	Solyc03g098460
						Solyc05g046133	Solyc06g006080	Solyc09g018500	Solyc03g098620
						Solyc05g046270	Solyc06g007165	Solyc09g031610	Solyc03g098630
						Solyc05g046290	Solyc06g007190	Solyc09g030385	Solyc03g098710
						Solyc05g047540	Solyc06g007200	Solyc09g055180	Solyc03g098770
						Solyc05g047580	Solyc06g007320	Solyc09g059345	Solyc03g098790
						Solyc05g047670	Solyc06g007550	Solyc09g059390	Solyc03g019960
						Solyc05g048810	Solyc06g007610	Solyc09g059460	Solyc03g019850
						Solyc05g048850	Solyc06g007700	Solyc09g060100	Solyc03g110950
						Solyc05g050160	Solyc06g007770	Solyc09g061330	Solyc03g111040
						Solyc05g050770	Solyc06g007960	Solyc09g061420	Solyc03g111110
						Solyc05g050790	Solyc06g008040	Solyc09g061840	Solyc03g111150
						Solyc05g050850	Solyc06g008200	Solyc09g063060	Solyc03g111230
						Solyc05g050860	Solyc06g008210	Solyc09g063090	Solyc03g111550
						Solyc05g051220	Solyc06g008220	Solyc09g064310	Solyc03g111700
						Solyc05g051490	Solyc06g008320	Solyc09g064450	Solyc03g111740
						Solyc05g051590	Solyc06g008480	Solyc09g064810	Solyc03g112030
						Solyc05g051640	Solyc06g008490	Solyc09g065280	Solyc03g112050
						Solyc05g051790	Solyc06g008860	Solyc09g065490	Solyc03g112060
						Solyc05g051820	Solyc06g008890	Solyc09g065550	Solyc03g112090
						Solyc05g051830	Solyc06g008960	Solyc09g065600	Solyc03g112230
						Solyc05g051870	Solyc06g009190	Solyc09g072880	Solyc03g112240
						Solyc05g052100	Solyc06g009380	Solyc09g074850	Solyc03g112250
						Solyc05g052110	Solyc06g009510	Solyc09g075120	Solyc03g112290
						Solyc05g052830	Solyc06g009610	Solyc09g075140	Solyc03g112600
						Solyc05g053200	Solyc06g009950	Solyc09g075350	Solyc03g112680
						Solyc05g053340	Solyc06g011350	Solyc09g075810	Solyc03g112700
						Solyc05g053500	Solyc06g025425	Solyc09g082250	Solyc03g112780
						Solyc05g053620	Solyc06g018000	Solyc09g082630	Solyc03g112860
						Solyc05g053770	Solyc06g033830	Solyc09g082650	Solyc03g113020
						Solyc05g053800	Solyc06g033990	Solyc09g083030	Solyc03g113030
						Solyc05g053870	Solyc06g035620	Solyc09g084450	Solyc03g113070
						Solyc05g053920	Solyc06g035690	Solyc09g089570	Solyc03g113140
						Solyc05g053965	Solyc06g035790	Solyc09g089850	Solyc03g113150
						Solyc05g054030	Solyc06g035860	Solyc09g090150	Solyc03g113190
						Solyc05g054110	Solyc06g036040	Solyc09g090420	Solyc03g113220
						Solyc05g054230	Solyc06g036050	Solyc09g090970	Solyc03g113340
						Solyc05g054430	Solyc06g036290	Solyc09g090980	Solyc03g113370
						Solyc05g054795	Solyc06g036470	Solyc09g091210	Solyc03g113400
						Solyc05g054840	Solyc06g036680	Solyc09g091220	Solyc03g113420
						Solyc05g055000	Solyc06g036890	Solyc09g091610	Solyc03g114090
						Solyc05g055150	Solyc06g043150	Solyc09g091855	Solyc03g114100
						Solyc05g055290	Solyc06g043036	Solyc09g091920	Solyc03g114140
						Solyc05g055400	Solyc06g048470	Solyc09g092020	Solyc03g114150
						Solyc05g055420	Solyc06g048950	Solyc09g092050	Solyc03g114200
						Solyc05g055490	Solyc06g048960	Solyc09g092260	Solyc03g114300
						Solyc05g055567	Solyc06g049060	Solyc09g092270	Solyc03g114310
						Solyc05g055580	Solyc06g050360	Solyc09g092400	Solyc03g114330
						Solyc05g055585	Solyc06g050370	Solyc09g092470	Solyc03g114450
						Solyc05g055620	Solyc06g050510	Solyc09g092605	Solyc03g114520
						Solyc05g055830	Solyc06g050610	Solyc09g098370	Solyc03g114780
						Solyc05g055910	Solyc06g050690	Solyc10g005500	Solyc03g114870
						Solyc05g055930	Solyc06g050700	Solyc10g005650	Solyc03g114910
						Solyc05g056290	Solyc06g050730	Solyc10g005900	Solyc03g115060
						Solyc05g056385	Solyc06g051045	Solyc10g006080	Solyc03g115410
						Solyc06g005080	Solyc06g051130	Solyc10g006157	Solyc03g115610
						Solyc06g005180	Solyc06g051460	Solyc10g006590	Solyc03g115660
						Solyc06g005580	Solyc06g053140	Solyc10g006920	Solyc03g115720
						Solyc06g005950	Solyc06g053190	Solyc10g007065	Solyc03g115760
						Solyc06g007170	Solyc06g053640	Solyc10g007080	Solyc03g115850
						Solyc06g007440	Solyc06g053980	Solyc10g007110	Solyc03g116470
						Solyc06g007590	Solyc06g053990	Solyc10g007360	Solyc03g116620
						Solyc06g007650	Solyc06g054180	Solyc10g008280	Solyc03g116740
						Solyc06g007770	Solyc06g054270	Solyc10g008470	Solyc03g116830
						Solyc06g007960	Solyc06g054410	Solyc10g008490	Solyc03g117180
						Solyc06g007980	Solyc06g054625	Solyc10g008540	Solyc03g117210
						Solyc06g007990	Solyc06g060140	Solyc10g008750	Solyc03g117430
						Solyc06g008110	Solyc06g060190	Solyc10g008830	Solyc03g117480
						Solyc06g008200	Solyc06g060210	Solyc10g009170	Solyc03g117500
						Solyc06g008265	Solyc06g060290	Solyc10g009520	Solyc03g117510
						Solyc06g008300	Solyc06g060720	Solyc10g009505	Solyc03g117520
						Solyc06g008330	Solyc06g062300	Solyc10g012370	Solyc03g117580
						Solyc06g008450	Solyc06g062360	Solyc10g017990	Solyc03g117710
						Solyc06g008530	Solyc06g062420	Solyc10g018120	Solyc03g117730
						Solyc06g008560	Solyc06g062580	Solyc10g024360	Solyc03g117770
						Solyc06g008880	Solyc06g062660	Solyc10g038120	Solyc03g117790
						Solyc06g009140	Solyc06g062690	Solyc10g039210	Solyc03g117960
						Solyc06g009680	Solyc06g062700	Solyc10g061960	Solyc03g117970
						Solyc06g009900	Solyc06g062800	Solyc10g061970	Solyc03g118140
						Solyc06g011370	Solyc06g062805	Solyc10g062180	Solyc03g118220
						Solyc06g011663	Solyc06g063200	Solyc10g044840	Solyc03g118250
						Solyc06g024375	Solyc06g064580	Solyc10g045433	Solyc03g118260
						Solyc06g018000	Solyc06g064670	Solyc10g046930	Solyc03g118410
						Solyc06g018003	Solyc06g064750	Solyc10g047060	Solyc03g118420
						Solyc06g018004	Solyc06g064800	Solyc10g049477	Solyc03g118425
						Solyc06g019150	Solyc06g064830	Solyc10g049600	Solyc03g118510
						Solyc06g030490	Solyc06g065690	Solyc10g049660	Solyc03g118810
						Solyc06g030540	Solyc06g065750	Solyc10g050690	Solyc03g119010
						Solyc06g030590	Solyc06g065820	Solyc10g050757	Solyc03g119020
						Solyc06g030650	Solyc06g065830	Solyc10g051010	Solyc03g119050
						Solyc06g033920	Solyc06g065840	Solyc10g051120	Solyc03g119080
						Solyc06g034150	Solyc06g066060	Solyc10g052745	Solyc03g119100
						Solyc06g034160	Solyc06g066580	Solyc10g054420	Solyc03g119230
						Solyc06g035520	Solyc06g067890	Solyc10g054590	Solyc03g119280
						Solyc06g035620	Solyc06g067920	Solyc10g055260	Solyc03g119330
						Solyc06g035860	Solyc06g067930	Solyc10g055420	Solyc03g119480
						Solyc06g035920	Solyc06g068090	Solyc10g055610	Solyc03g119550
						Solyc06g035943	Solyc06g068350	Solyc10g074920	Solyc03g119560
						Solyc06g035960	Solyc06g068420	Solyc10g076220	Solyc03g119930
						Solyc06g036290	Solyc06g068990	Solyc10g076390	Solyc03g119940
						Solyc06g036463	Solyc06g069000	Solyc10g076670	Solyc03g120020
						Solyc06g036600	Solyc06g069100	Solyc10g076720	Solyc03g120030
						Solyc06g036680	Solyc06g069190	Solyc10g076820	Solyc03g120160
						Solyc06g043150	Solyc06g069470	Solyc10g076880	Solyc03g120260
						Solyc06g043020	Solyc06g069565	Solyc10g076890	Solyc03g120310
						Solyc06g048450	Solyc06g071000	Solyc10g078510	Solyc03g120470
						Solyc06g048750	Solyc06g071290	Solyc10g078740	Solyc03g120475
						Solyc06g050180	Solyc06g071390	Solyc10g079280	Solyc03g120500
						Solyc06g050220	Solyc06g071610	Solyc10g079610	Solyc03g120760
						Solyc06g050315	Solyc06g071780	Solyc10g080030	Solyc03g120770
						Solyc06g050340	Solyc06g071880	Solyc10g080870	Solyc03g120780
						Solyc06g051350	Solyc06g071890	Solyc10g080890	Solyc03g120880
						Solyc06g051520	Solyc06g071930	Solyc10g081220	Solyc03g121290
						Solyc06g051820	Solyc06g072370	Solyc10g081300	Solyc03g121420
						Solyc06g084760	Solyc06g072420	Solyc10g081620	Solyc03g121520
						Solyc06g084770	Solyc06g072440	Solyc10g081950	Solyc03g121530
						Solyc06g052000	Solyc06g072465	Solyc10g083250	Solyc03g121550
						Solyc06g052010	Solyc06g072550	Solyc10g083290	Solyc03g121800
						Solyc06g053750	Solyc06g072570	Solyc10g083300	Solyc03g122100
						Solyc06g053810	Solyc06g072640	Solyc10g083350	Solyc03g122110
						Solyc06g053930	Solyc06g072940	Solyc10g083580	Solyc03g122270
						Solyc06g053970	Solyc06g073330	Solyc10g083860	Solyc03g123450
						Solyc06g054370	Solyc06g074030	Solyc10g084080	Solyc03g123560
						Solyc06g059930	Solyc06g074280	Solyc10g084110	Solyc03g124040
						Solyc06g059970	Solyc06g074320	Solyc10g084940	Solyc03g124050
						Solyc06g060010	Solyc06g074390	Solyc10g084980	Solyc03g124060
						Solyc06g060120	Solyc06g074560	Solyc10g085050	Solyc04g005040
						Solyc06g060180	Solyc06g074600	Solyc10g085090	Solyc04g005670
						Solyc06g060270	Solyc06g075080	Solyc10g085610	Solyc04g005700
						Solyc06g060370	Solyc06g075090	Solyc10g085690	Solyc04g005790
						Solyc06g060890	Solyc06g075760	Solyc10g085950	Solyc04g007120
						Solyc06g060940	Solyc06g075960	Solyc10g086060	Solyc04g007200
						Solyc06g060960	Solyc06g075970	Solyc10g086180	Solyc04g007230
						Solyc06g061030	Solyc06g076050	Solyc10g086710	Solyc04g007400
						Solyc06g061250	Solyc06g076330	Solyc11g005090	Solyc04g007490
						Solyc06g061270	Solyc06g076400	Solyc11g005340	Solyc04g007570
						Solyc06g062280	Solyc06g076540	Solyc11g005760	Solyc04g007600
						Solyc06g062420	Solyc06g076690	Solyc11g006200	Solyc04g007700
						Solyc06g062970	Solyc06g076760	Solyc11g007030	Solyc04g007910
						Solyc06g063085	Solyc06g076840	Solyc11g007370	Solyc04g008180
						Solyc06g063430	Solyc06g082190	Solyc11g007730	Solyc04g008220
						Solyc06g064450	Solyc06g082500	Solyc11g007850	Solyc04g008330
						Solyc06g064590	Solyc06g082510	Solyc11g007900	Solyc04g008520
						Solyc06g065360	Solyc06g082630	Solyc11g007890	Solyc04g008620
						Solyc06g065600	Solyc06g082830	Solyc11g008260	Solyc04g008690
						Solyc06g065730	Solyc06g083140	Solyc11g010110	Solyc04g008750
						Solyc06g066360	Solyc06g083270	Solyc11g010120	Solyc04g008760
						Solyc06g066580	Solyc06g083570	Solyc11g010310	Solyc04g008840
						Solyc06g066690	Solyc06g083580	Solyc11g010420	Solyc04g008880
						Solyc06g066790	Solyc06g083640	Solyc11g011548	Solyc04g009040
						Solyc06g066820	Solyc06g083770	Solyc11g011940	Solyc04g009180
						Solyc06g066830	Solyc06g083780	Solyc11g012230	Solyc04g009240
						Solyc06g067870	Solyc06g083890	Solyc11g012290	Solyc04g009310
						Solyc06g068420	Solyc06g084090	Solyc11g012590	Solyc04g009320
						Solyc06g068470	Solyc06g084260	Solyc11g012705	Solyc04g009400
						Solyc06g068500	Solyc06g084570	Solyc11g012710	Solyc04g009420
						Solyc06g068680	Solyc02g094770	Solyc11g012860	Solyc04g009430
						Solyc06g068840	Solyc07g006110	Solyc11g013120	Solyc04g009440
						Solyc06g069100	Solyc07g007110	Solyc11g013155	Solyc04g009450
						Solyc06g069110	Solyc07g007125	Solyc11g013270	Solyc04g009500
						Solyc06g069120	Solyc07g007300	Solyc11g013310	Solyc04g009530
						Solyc06g069850	Solyc07g007430	Solyc11g013450	Solyc04g009580
						Solyc06g071140	Solyc07g007550	Solyc11g018550	Solyc04g009655
						Solyc06g071250	Solyc07g007590	Solyc11g021365	Solyc04g010000
						Solyc06g071780	Solyc07g007630	Solyc11g051120	Solyc04g010180
						Solyc06g072320	Solyc07g007760	Solyc11g027880	Solyc04g010190
						Solyc06g072440	Solyc07g007980	Solyc11g032050	Solyc04g010230
						Solyc06g072620	Solyc07g008250	Solyc11g045330	Solyc04g011440
						Solyc06g072720	Solyc07g008320	Solyc11g044910	Solyc04g011570
						Solyc06g072940	Solyc07g008990	Solyc11g044840	Solyc04g011680
						Solyc06g073140	Solyc07g009000	Solyc11g044740	Solyc04g011990
						Solyc06g073160	Solyc07g009030	Solyc11g044530	Solyc04g012070
						Solyc06g073780	Solyc07g009235	Solyc11g042880	Solyc04g014320
						Solyc06g073840	Solyc07g009290	Solyc11g042820	Solyc04g014420
						Solyc06g073920	Solyc07g009330	Solyc11g040340	Solyc04g014510
						Solyc06g074650	Solyc07g009337	Solyc11g040330	Solyc04g014578
						Solyc06g075070	Solyc07g009520	Solyc11g039640	Solyc04g014640
						Solyc06g075090	Solyc07g009575	Solyc11g061960	Solyc04g014760
						Solyc06g075100	Solyc07g014580	Solyc11g062400	Solyc04g014790
						Solyc06g075140	Solyc07g014640	Solyc11g062420	Solyc04g015100
						Solyc06g075520	Solyc07g017780	Solyc11g062440	Solyc04g015140
						Solyc06g075513	Solyc07g018300	Solyc11g064750	Solyc04g015280
						Solyc06g075650	Solyc07g018405	Solyc11g064785	Solyc04g015290
						Solyc06g076130	Solyc07g019505	Solyc11g065360	Solyc04g015475
						Solyc06g076330	Solyc07g019520	Solyc11g065630	Solyc04g015480
						Solyc06g076980	Solyc07g019550	Solyc11g066203	Solyc04g015520
						Solyc06g082420	Solyc07g021405	Solyc11g066500	Solyc04g015590
						Solyc06g083415	Solyc07g024070	Solyc11g066800	Solyc04g015940
						Solyc06g083490	Solyc07g025290	Solyc11g066830	Solyc04g016040
						Solyc06g083500	Solyc07g032420	Solyc11g066910	Solyc04g016170
						Solyc06g083580	Solyc07g032430	Solyc11g067020	Solyc04g016210
						Solyc06g083890	Solyc07g032794	Solyc11g068350	Solyc04g016360
						Solyc06g084530	Solyc07g040950	Solyc11g068650	Solyc04g016370
						Solyc06g084570	Solyc07g041170	Solyc11g069240	Solyc04g016400
						Solyc06g084590	Solyc07g041180	Solyc11g069620	Solyc04g016510
						Solyc07g005350	Solyc07g041245	Solyc11g070120	Solyc04g040120
						Solyc07g005420	Solyc07g041430	Solyc11g071290	Solyc04g040110
						Solyc07g005650	Solyc07g041820	Solyc11g071400	Solyc04g039880
						Solyc07g006035	Solyc07g041830	Solyc11g072100	Solyc04g026360
						Solyc07g006300	Solyc07g041890	Solyc12g005080	Solyc04g026223
						Solyc07g006520	Solyc07g041930	Solyc12g005110	Solyc04g026227
						Solyc07g006690	Solyc07g042300	Solyc12g005320	Solyc04g025880
						Solyc07g006900	Solyc07g043260	Solyc12g005350	Solyc04g025530
						Solyc07g007040	Solyc07g043510	Solyc12g005420	Solyc04g025377
						Solyc07g007140	Solyc07g043550	Solyc12g005580	Solyc04g025300
						Solyc07g007300	Solyc07g043640	Solyc12g005630	Solyc04g025260
						Solyc07g007550	Solyc07g044740	Solyc12g005680	Solyc04g024530
						Solyc07g007980	Solyc07g044930	Solyc12g005710	Solyc04g045480
						Solyc07g008095	Solyc07g045090	Solyc12g006450	Solyc04g049070
						Solyc07g008160	Solyc07g045440	Solyc12g006530	Solyc04g049090
						Solyc07g008360	Solyc07g045550	Solyc12g007070	Solyc04g049160
						Solyc07g008410	Solyc07g047850	Solyc12g008460	Solyc04g049330
						Solyc07g008520	Solyc07g048010	Solyc12g008530	Solyc04g049340
						Solyc07g008560	Solyc07g048080	Solyc12g008665	Solyc04g049410
						Solyc07g008710	Solyc07g049140	Solyc12g008890	Solyc04g049790
						Solyc07g008940	Solyc07g049325	Solyc12g008900	Solyc04g049840
						Solyc07g008990	Solyc07g049630	Solyc12g009040	Solyc04g049910
						Solyc07g009130	Solyc07g051845	Solyc12g009180	Solyc04g050305
						Solyc07g009235	Solyc07g052260	Solyc12g009200	Solyc04g050310
						Solyc07g009330	Solyc07g052310	Solyc12g009660	Solyc04g050480
						Solyc07g009520	Solyc07g052420	Solyc12g009690	Solyc04g050790
						Solyc07g009560	Solyc07g052490	Solyc12g010115	Solyc04g050970
						Solyc07g009580	Solyc07g052640	Solyc12g010170	Solyc04g051190
						Solyc07g014680	Solyc07g052780	Solyc12g010210	Solyc04g051247
						Solyc07g014740	Solyc07g053010	Solyc12g010680	Solyc04g051360
						Solyc07g015810	Solyc07g053150	Solyc12g011040	Solyc04g051400
						Solyc07g015840	Solyc07g053280	Solyc12g011090	Solyc04g051410
						Solyc07g015910	Solyc07g053450	Solyc12g011140	Solyc04g051480
						Solyc07g015940	Solyc07g053700	Solyc12g011310	Solyc04g051660
						Solyc07g017330	Solyc07g053870	Solyc12g013530	Solyc04g051670
						Solyc07g017500	Solyc07g053990	Solyc12g013650	Solyc04g051760
						Solyc07g017733	Solyc07g054170	Solyc12g013670	Solyc04g054170
						Solyc07g017870	Solyc07g054315	Solyc12g014020	Solyc04g054180
						Solyc07g017950	Solyc07g054830	Solyc12g014185	Solyc04g054190
						Solyc07g017990	Solyc07g054820	Solyc12g014310	Solyc04g054510
						Solyc07g018144	Solyc07g054897	Solyc12g014320	Solyc04g054520
						Solyc07g018350	Solyc07g055300	Solyc12g014360	Solyc04g054720
						Solyc07g018387	Solyc07g055550	Solyc12g014500	Solyc04g055250
						Solyc07g019510	Solyc07g055750	Solyc12g014590	Solyc04g056290
						Solyc07g020920	Solyc07g055760	Solyc12g015770	Solyc04g056390
						Solyc07g021020	Solyc07g055790	Solyc12g017510	Solyc04g056450
						Solyc07g021405	Solyc07g055810	Solyc12g019860	Solyc04g056570
						Solyc07g021467	Solyc07g056040	Solyc12g062820	Solyc04g056580
						Solyc07g021490	Solyc07g056260	Solyc12g035190	Solyc04g056630
						Solyc07g021510	Solyc07g056360	Solyc12g035520	Solyc04g056640
						Solyc07g022790	Solyc07g056460	Solyc12g036160	Solyc04g057930
						Solyc07g022860	Solyc07g056615	Solyc12g036165	Solyc04g057940
						Solyc07g024020	Solyc07g061850	Solyc12g040450	Solyc04g058060
						Solyc07g024070	Solyc07g061905	Solyc12g040870	Solyc04g058150
						Solyc07g032220	Solyc07g062350	Solyc12g042300	Solyc04g063240
						Solyc07g032420	Solyc07g062360	Solyc12g042470	Solyc04g063380
						Solyc07g032615	Solyc07g062480	Solyc12g042580	Solyc04g064520
						Solyc07g032620	Solyc07g062520	Solyc12g042590	Solyc04g064560
						Solyc07g032794	Solyc07g062550	Solyc12g042760	Solyc04g064620
						Solyc07g039295	Solyc07g062560	Solyc12g042770	Solyc04g064630
						Solyc07g039570	Solyc07g062610	Solyc12g042780	Solyc04g064710
						Solyc07g040745	Solyc07g063110	Solyc12g043150	Solyc04g064870
						Solyc07g040780	Solyc07g063210	Solyc12g044600	Solyc04g064880
						Solyc07g040980	Solyc07g063330	Solyc12g044860	Solyc04g071140
						Solyc07g041010	Solyc07g063370	Solyc12g044900	Solyc04g071180
						Solyc07g041020	Solyc07g063610	Solyc12g049460	Solyc04g071270
						Solyc07g041180	Solyc07g063620	Solyc12g049443	Solyc04g071340
						Solyc04g048940	Solyc07g063680	Solyc12g049550	Solyc04g071420
						Solyc07g041280	Solyc07g063840	Solyc12g055750	Solyc04g071620
						Solyc07g041300	Solyc07g064210	Solyc12g055970	Solyc04g071730
						Solyc07g041430	Solyc07g064600	Solyc12g056760	Solyc04g071760
						Solyc07g041510	Solyc07g064650	Solyc12g056860	Solyc04g071920
						Solyc07g041750	Solyc07g064960	Solyc12g087980	Solyc04g072150
						Solyc07g042160	Solyc07g064970	Solyc12g088040	Solyc04g072190
						Solyc07g042190	Solyc07g065410	Solyc12g088110	Solyc04g072210
						Solyc07g042313	Solyc07g065490	Solyc12g088130	Solyc04g072250
						Solyc07g042810	Solyc07g065530	Solyc12g088190	Solyc04g072490
						Solyc07g042830	Solyc07g065710	Solyc12g088310	Solyc04g072540
						Solyc07g042843	Solyc07g065740	Solyc12g088750	Solyc04g072630
						Solyc07g043000	Solyc07g066010	Solyc12g089010	Solyc04g072690
						Solyc07g043310	Solyc07g066130	Solyc12g089220	Solyc04g072740
						Solyc07g044730	Solyc08g005130	Solyc12g089230	Solyc04g072770
						Solyc07g044880	Solyc08g005750	Solyc12g094400	Solyc04g072775
						Solyc07g045030	Solyc08g005930	Solyc12g094550	Solyc04g072790
						Solyc07g045050	Solyc08g005940	Solyc12g096850	Solyc04g072940
						Solyc07g047850	Solyc08g006010	Solyc12g098230	Solyc04g074070
						Solyc07g049130	Solyc08g006040	Solyc12g098660	Solyc04g074270
						Solyc07g049300	Solyc08g006050	Solyc12g098670	Solyc04g074300
						Solyc07g049440	Solyc08g006110	Solyc12g099180	Solyc04g074320
						Solyc07g049670	Solyc08g006254	Solyc12g099360	Solyc04g074480
						Solyc07g049690	Solyc08g006256	Solyc12g099700	Solyc04g074545
						Solyc07g049740	Solyc08g006290		Solyc04g074760
						Solyc07g049750	Solyc08g006380		Solyc04g076090
						Solyc07g049783	Solyc08g006730		Solyc04g076190
						Solyc07g049790	Solyc08g006920		Solyc04g076200
						Solyc07g051820	Solyc08g006990		Solyc04g076350
						Solyc07g051845	Solyc08g007030		Solyc04g076470
						Solyc07g052110	Solyc08g007040		Solyc04g076760
						Solyc07g052420	Solyc08g007050		Solyc04g076800
						Solyc07g052453	Solyc08g007130		Solyc04g076840
						Solyc07g052470	Solyc08g007610		Solyc04g076880
						Solyc07g052480	Solyc08g007990		Solyc04g077060
						Solyc07g052640	Solyc08g008600		Solyc04g077190
						Solyc07g053010	Solyc08g008610		Solyc04g077290
						Solyc07g053225	Solyc08g008630		Solyc04g077510
						Solyc07g053250	Solyc08g013710		Solyc04g077550
						Solyc07g053380	Solyc08g014310		Solyc04g077570
						Solyc07g053450	Solyc08g016270		Solyc04g077630
						Solyc07g053800	Solyc08g016500		Solyc04g077870
						Solyc07g053870	Solyc08g048160		Solyc04g078255
						Solyc07g054440	Solyc08g041980		Solyc04g078280
						Solyc07g054500	Solyc08g022170		Solyc04g078270
						Solyc07g054920	Solyc08g022160		Solyc04g078460
						Solyc07g054910	Solyc08g022150		Solyc04g078730
						Solyc07g055000	Solyc08g029410		Solyc04g078820
						Solyc07g055540	Solyc08g029400		Solyc04g078830
						Solyc07g055550	Solyc08g028940		Solyc04g078860
						Solyc07g055695	Solyc08g028920		Solyc04g078980
						Solyc07g055760	Solyc08g028910		Solyc04g078990
						Solyc07g056170	Solyc08g028820		Solyc04g079060
						Solyc07g056190	Solyc08g028700		Solyc04g079070
						Solyc07g056220	Solyc08g060970		Solyc04g079100
						Solyc07g056230	Solyc08g061160		Solyc04g079350
						Solyc07g056320	Solyc08g061180		Solyc04g079360
						Solyc07g056410	Solyc08g061480		Solyc04g079380
						Solyc07g056450	Solyc08g061610		Solyc04g079505
						Solyc07g056630	Solyc08g061690		Solyc04g083160
						Solyc07g056690	Solyc08g061890		Solyc04g079590
						Solyc07g056703	Solyc08g062170		Solyc04g079640
						Solyc07g056707	Solyc08g062630		Solyc04g079643
						Solyc07g061770	Solyc08g062970		Solyc04g079660
						Solyc07g061905	Solyc08g063050		Solyc04g079680
						Solyc07g061990	Solyc08g065190		Solyc04g079860
						Solyc07g062230	Solyc08g065260		Solyc04g079880
						Solyc07g062290	Solyc08g065470		Solyc04g080000
						Solyc07g062510	Solyc08g065590		Solyc04g080100
						Solyc07g062550	Solyc08g065910		Solyc04g080110
						Solyc07g062610	Solyc08g066400		Solyc04g080230
						Solyc07g062685	Solyc08g066610		Solyc04g080270
						Solyc07g062700	Solyc08g066680		Solyc04g080390
						Solyc07g062860	Solyc08g066780		Solyc04g080430
						Solyc07g062900	Solyc08g066900		Solyc04g080610
						Solyc07g063320	Solyc08g066990		Solyc04g080950
						Solyc07g063370	Solyc08g067060		Solyc04g080955
						Solyc07g063400	Solyc08g067070		Solyc04g080990
						Solyc07g063650	Solyc08g067620		Solyc04g081020
						Solyc07g064260	Solyc08g067940		Solyc04g081030
						Solyc07g064720	Solyc08g068120		Solyc04g081350
						Solyc07g064790	Solyc08g068410		Solyc04g081410
						Solyc07g064970	Solyc08g069010		Solyc04g081450
						Solyc07g065020	Solyc08g069020		Solyc04g081640
						Solyc07g065240	Solyc08g069170		Solyc04g081790
						Solyc07g065720	Solyc08g074240		Solyc04g081970
						Solyc07g065740	Solyc08g074360		Solyc04g082000
						Solyc07g065810	Solyc08g074420		Solyc04g082070
						Solyc07g065880	Solyc08g074715		Solyc04g082370
						Solyc07g065900	Solyc08g074770		Solyc04g082430
						Solyc07g066000	Solyc08g074830		Solyc04g082440
						Solyc07g066130	Solyc08g074835		Solyc04g082650
						Solyc07g066230	Solyc08g074940		Solyc04g082710
						Solyc07g066250	Solyc08g075017		Solyc04g082750
						Solyc08g005316	Solyc08g075310		Solyc04g082790
						Solyc08g005720	Solyc08g075390		Solyc04g082840
						Solyc08g005725	Solyc08g075710		Solyc04g082890
						Solyc08g005880	Solyc08g075720		Solyc05g005535
						Solyc08g005960	Solyc08g075840		Solyc05g005620
						Solyc08g006030	Solyc08g075860		Solyc05g005630
						Solyc08g006110	Solyc08g075890		Solyc05g005780
						Solyc08g006130	Solyc08g075900		Solyc05g005840
						Solyc08g006200	Solyc08g075930		Solyc05g005900
						Solyc08g006254	Solyc08g076300		Solyc05g005970
						Solyc08g006380	Solyc08g076440		Solyc05g006240
						Solyc08g006480	Solyc08g076640		Solyc05g006460
						Solyc08g006850	Solyc08g076660		Solyc05g006550
						Solyc08g006860	Solyc08g076700		Solyc05g006560
						Solyc08g006920	Solyc08g077020		Solyc05g006810
						Solyc08g006990	Solyc08g077160		Solyc05g007140
						Solyc08g007050	Solyc08g077300		Solyc05g007160
						Solyc08g007080	Solyc08g077310		Solyc05g007350
						Solyc08g007180	Solyc08g077520		Solyc05g007420
						Solyc08g007360	Solyc08g077600		Solyc05g007560
						Solyc08g007430	Solyc08g077610		Solyc05g007770
						Solyc08g007740	Solyc08g077750		Solyc05g007780
						Solyc08g007760	Solyc08g078240		Solyc05g007880
						Solyc08g007900	Solyc08g078360		Solyc05g008020
						Solyc08g008130	Solyc08g078610		Solyc05g008260
						Solyc08g008620	Solyc08g078620		Solyc05g008280
						Solyc08g008630	Solyc08g078660		Solyc05g008380
						Solyc08g013710	Solyc08g078880		Solyc05g008460
						Solyc08g013730	Solyc08g079090		Solyc05g008480
						Solyc08g013750	Solyc08g079330		Solyc05g008510
						Solyc08g013860	Solyc08g083410		Solyc05g008520
						Solyc08g013990	Solyc08g083520		Solyc05g008580
						Solyc08g014010	Solyc08g079420		Solyc05g008600
						Solyc08g014060	Solyc08g079480		Solyc05g008610
						Solyc08g014130	Solyc08g079800		Solyc05g008910
						Solyc08g014610	Solyc08g079810		Solyc05g008950
						Solyc08g015960	Solyc08g079860		Solyc05g008970
						Solyc08g016050	Solyc08g079890		Solyc05g009050
						Solyc08g016500	Solyc08g079990		Solyc05g009100
						Solyc08g016565	Solyc08g080120		Solyc05g009170
						Solyc08g042143	Solyc08g080370		Solyc05g009350
						Solyc08g041980	Solyc08g080480		Solyc05g009430
						Solyc08g023510	Solyc08g081410		Solyc05g009440
						Solyc08g023470	Solyc08g081457		Solyc05g009520
						Solyc08g022170	Solyc08g081460		Solyc05g009540
						Solyc08g022135	Solyc08g081640		Solyc05g009660
						Solyc08g021830	Solyc08g081750		Solyc05g009730
						Solyc08g029410	Solyc08g081780		Solyc05g009750
						Solyc08g029400	Solyc08g082135		Solyc05g009875
						Solyc08g029220	Solyc08g082150		Solyc05g010140
						Solyc08g029000	Solyc08g082270		Solyc05g010340
						Solyc08g028950	Solyc08g082390		Solyc05g010350
						Solyc08g028930	Solyc08g082410		Solyc05g010460
						Solyc08g028920	Solyc08g082630		Solyc05g010470
						Solyc08g028700	Solyc08g082810		Solyc05g010560
						Solyc08g060970	Solyc08g082890		Solyc05g010620
						Solyc08g061323	Solyc08g083155		Solyc05g010780
						Solyc08g061497	Solyc09g005830		Solyc05g010790
						Solyc08g061560	Solyc09g007130		Solyc05g012040
						Solyc08g061610	Solyc09g007980		Solyc05g012215
						Solyc08g062100	Solyc09g008080		Solyc05g012220
						Solyc08g062110	Solyc09g008090		Solyc05g012350
						Solyc08g062190	Solyc09g008360		Solyc05g012580
						Solyc08g062250	Solyc09g008440		Solyc05g012700
						Solyc08g062275	Solyc09g008530		Solyc05g012710
						Solyc08g063070	Solyc09g008540		Solyc05g012910
						Solyc08g065250	Solyc09g008670		Solyc05g012970
						Solyc08g065245	Solyc09g098620		Solyc05g013170
						Solyc08g065380	Solyc09g009100		Solyc05g013180
						Solyc08g065420	Solyc09g009580		Solyc05g013207
						Solyc08g065780	Solyc09g009590		Solyc05g013230
						Solyc08g066490	Solyc09g009690		Solyc05g013240
						Solyc08g066690	Solyc09g009750		Solyc05g013400
						Solyc08g066720	Solyc09g009830		Solyc05g013410
						Solyc08g066760	Solyc09g009940		Solyc05g013440
						Solyc08g066770	Solyc09g009950		Solyc05g013500
						Solyc08g066780	Solyc09g009990		Solyc05g013720
						Solyc08g067030	Solyc09g010040		Solyc05g013750
						Solyc08g067200	Solyc09g010120		Solyc05g013790
						Solyc08g067340	Solyc09g010260		Solyc05g013810
						Solyc08g067740	Solyc09g010330		Solyc05g014200
						Solyc08g067760	Solyc09g010550		Solyc05g014240
						Solyc08g068120	Solyc09g010568		Solyc05g014290
						Solyc08g068250	Solyc09g010610		Solyc05g014550
						Solyc08g068470	Solyc09g011130		Solyc05g014560
						Solyc08g068630	Solyc09g011210		Solyc05g014580
						Solyc08g068990	Solyc09g011220		Solyc05g014700
						Solyc08g069010	Solyc09g011260		Solyc05g015160
						Solyc08g069125	Solyc09g011490		Solyc05g015860
						Solyc08g074360	Solyc09g014740		Solyc05g015955
						Solyc08g074370	Solyc09g014780		Solyc05g015980
						Solyc08g074450	Solyc09g014890		Solyc05g016230
						Solyc08g074715	Solyc09g015040		Solyc05g016330
						Solyc08g074830	Solyc09g015080		Solyc05g016410
						Solyc08g074940	Solyc09g015280		Solyc05g017760
						Solyc08g074980	Solyc09g015340		Solyc05g017860
						Solyc08g074990	Solyc09g015420		Solyc05g018050
						Solyc08g075013	Solyc09g015520		Solyc05g048770
						Solyc08g075017	Solyc09g015530		Solyc05g049940
						Solyc08g075100	Solyc09g015690		Solyc05g049990
						Solyc08g075320	Solyc09g015890		Solyc05g050280
						Solyc08g075480	Solyc09g015910		Solyc05g050350
						Solyc08g075710	Solyc09g018010		Solyc05g050360
						Solyc08g075750	Solyc09g018150		Solyc05g050430
						Solyc08g075830	Solyc09g018230		Solyc05g050500
						Solyc08g075930	Solyc09g037083		Solyc05g051200
						Solyc08g076700	Solyc09g037170		Solyc05g051210
						Solyc08g076810	Solyc09g031850		Solyc05g051290
						Solyc08g076790	Solyc09g031840		Solyc05g051310
						Solyc08g077310	Solyc09g031830		Solyc05g051330
						Solyc08g077410	Solyc09g031820		Solyc05g051510
						Solyc08g077430	Solyc09g031810		Solyc05g051660
						Solyc08g078203	Solyc09g031800		Solyc05g051680
						Solyc08g078340	Solyc09g031528		Solyc05g051750
						Solyc08g078450	Solyc09g047900		Solyc05g051800
						Solyc08g078753	Solyc09g050030		Solyc05g051850
						Solyc08g078890	Solyc09g050040		Solyc05g051890
						Solyc08g079060	Solyc09g055650		Solyc05g051900
						Solyc08g079090	Solyc09g057528		Solyc05g051910
						Solyc08g079285	Solyc09g057567		Solyc05g051920
						Solyc08g079510	Solyc09g057875		Solyc05g052150
						Solyc08g079855	Solyc09g058970		Solyc05g052230
						Solyc08g079970	Solyc09g059240		Solyc05g052240
						Solyc08g080100	Solyc09g059477		Solyc05g052280
						Solyc08g080320	Solyc09g059550		Solyc05g052340
						Solyc08g080490	Solyc09g059630		Solyc05g052420
						Solyc08g080710	Solyc09g060100		Solyc05g052430
						Solyc08g080745	Solyc09g061340		Solyc05g052460
						Solyc08g081495	Solyc09g061450		Solyc05g052470
						Solyc08g081680	Solyc09g061460		Solyc05g052500
						Solyc08g081810	Solyc09g061685		Solyc05g052710
						Solyc08g081950	Solyc09g061820		Solyc05g052760
						Solyc08g082040	Solyc09g061850		Solyc05g052800
						Solyc08g082080	Solyc09g064340		Solyc05g052820
						Solyc08g082130	Solyc09g064550		Solyc05g052920
						Solyc08g082135	Solyc09g064730		Solyc05g052990
						Solyc08g082150	Solyc09g064740		Solyc05g053080
						Solyc08g082340	Solyc09g064790		Solyc05g053100
						Solyc08g082530	Solyc09g064920		Solyc05g053180
						Solyc08g082545	Solyc09g065330		Solyc05g053240
						Solyc08g082670	Solyc09g065590		Solyc05g053255
						Solyc08g083400	Solyc09g065670		Solyc05g053260
						Solyc09g005030	Solyc09g065820		Solyc05g053290
						Solyc09g007130	Solyc09g065883		Solyc05g053310
						Solyc09g007160	Solyc09g066300		Solyc05g053680
						Solyc09g007480	Solyc09g066380		Solyc05g053720
						Solyc09g008090	Solyc09g066440		Solyc05g053730
						Solyc09g008190	Solyc09g074050		Solyc05g053740
						Solyc09g008490	Solyc09g074120		Solyc05g053760
						Solyc09g008560	Solyc09g074210		Solyc05g053790
						Solyc09g098620	Solyc09g074250		Solyc05g053830
						Solyc09g009190	Solyc09g074410		Solyc05g053870
						Solyc09g009430	Solyc09g074510		Solyc05g053940
						Solyc09g009580	Solyc09g074550		Solyc05g054000
						Solyc09g009590	Solyc09g074620		Solyc05g054600
						Solyc09g009610	Solyc09g074667		Solyc05g054870
						Solyc09g009747	Solyc09g074960		Solyc05g054940
						Solyc09g009830	Solyc09g075070		Solyc05g054960
						Solyc09g009985	Solyc09g075300		Solyc05g055010
						Solyc09g010120	Solyc09g075550		Solyc05g055180
						Solyc09g010180	Solyc09g075700		Solyc05g055185
						Solyc09g010190	Solyc09g075740		Solyc05g055190
						Solyc09g010230	Solyc09g075795		Solyc05g056470
						Solyc09g010320	Solyc09g075830		Solyc05g056590
						Solyc09g010390	Solyc09g082130		Solyc05g056595
						Solyc09g010540	Solyc09g082150		Solyc06g005130
						Solyc09g010580	Solyc09g082410		Solyc06g005250
						Solyc09g010960	Solyc09g082510		Solyc06g005290
						Solyc09g011200	Solyc09g082560		Solyc06g005410
						Solyc09g011210	Solyc09g082770		Solyc06g005550
						Solyc09g011370	Solyc09g082820		Solyc06g005590
						Solyc09g011490	Solyc09g082960		Solyc06g005720
						Solyc09g011590	Solyc09g083360		Solyc06g005890
						Solyc09g011880	Solyc09g083400		Solyc06g005910
						Solyc09g011960	Solyc09g083445		Solyc06g005970
						Solyc09g013140	Solyc09g089550		Solyc06g006000
						Solyc09g014240	Solyc09g089580		Solyc06g006010
						Solyc09g014440	Solyc09g089770		Solyc06g007120
						Solyc09g014480	Solyc09g089840		Solyc06g007150
						Solyc09g014710	Solyc09g089950		Solyc06g007170
						Solyc09g014720	Solyc09g090080		Solyc06g007230
						Solyc09g014740	Solyc09g090090		Solyc06g007280
						Solyc09g014800	Solyc09g090280		Solyc06g007450
						Solyc09g014820	Solyc09g090310		Solyc06g007480
						Solyc09g014890	Solyc09g090420		Solyc06g007620
						Solyc09g015070	Solyc09g090510		Solyc06g007710
						Solyc09g015110	Solyc09g090640		Solyc06g007820
						Solyc09g015280	Solyc09g090720		Solyc06g007850
						Solyc09g015600	Solyc09g090980		Solyc06g007910
						Solyc09g015870	Solyc09g091320		Solyc06g007940
						Solyc09g015880	Solyc09g091410		Solyc06g007970
						Solyc09g015890	Solyc09g091420		Solyc06g008450
						Solyc09g015910	Solyc09g091610		Solyc06g008520
						Solyc09g016935	Solyc09g091650		Solyc06g008530
						Solyc09g016957	Solyc09g091860		Solyc06g008590
						Solyc09g018370	Solyc09g091900		Solyc06g008600
						Solyc09g018690	Solyc09g092050		Solyc06g008820
						Solyc09g019970	Solyc09g092120		Solyc06g008890
						Solyc09g037080	Solyc09g092150		Solyc06g008940
						Solyc09g037083	Solyc09g092520		Solyc06g008960
						Solyc09g031975	Solyc09g097820		Solyc06g009090
						Solyc09g031830	Solyc09g098290		Solyc06g009110
						Solyc09g031810	Solyc10g005020		Solyc06g009160
						Solyc09g031800	Solyc10g005210		Solyc06g009210
						Solyc09g031780	Solyc10g005750		Solyc06g009370
						Solyc09g047840	Solyc10g006270		Solyc06g009375
						Solyc09g050020	Solyc10g006427		Solyc06g009390
						Solyc09g050050	Solyc10g006470		Solyc06g009640
						Solyc09g055250	Solyc10g006650		Solyc06g009650
						Solyc09g055260	Solyc10g006755		Solyc06g010250
						Solyc09g055343	Solyc10g006810		Solyc06g016770
						Solyc09g055350	Solyc10g006930		Solyc06g030470
						Solyc09g057526	Solyc10g006940		Solyc06g030570
						Solyc09g057903	Solyc10g006990		Solyc06g033850
						Solyc09g059500	Solyc10g007100		Solyc06g034020
						Solyc09g059560	Solyc10g007160		Solyc06g034230
						Solyc09g059830	Solyc10g007158		Solyc06g034290
						Solyc09g059996	Solyc10g007220		Solyc06g034340
						Solyc09g060100	Solyc10g007260		Solyc06g034370
						Solyc09g061340	Solyc10g007270		Solyc06g035450
						Solyc09g061450	Solyc10g007450		Solyc06g035600
						Solyc09g061460	Solyc10g007510		Solyc06g035760
						Solyc09g061530	Solyc10g007580		Solyc06g035960
						Solyc09g061685	Solyc10g007650		Solyc06g035990
						Solyc09g061700	Solyc10g008150		Solyc06g036000
						Solyc09g063090	Solyc10g008440		Solyc06g036040
						Solyc09g063150	Solyc10g008490		Solyc06g036290
						Solyc09g064340	Solyc10g008640		Solyc06g036640
						Solyc09g064440	Solyc10g008680		Solyc06g043150
						Solyc09g064450	Solyc10g008780		Solyc06g043080
						Solyc09g064590	Solyc10g009050		Solyc06g043117
						Solyc09g064660	Solyc10g009270		Solyc06g048410
						Solyc09g064730	Solyc10g009400		Solyc06g048590
						Solyc09g064740	Solyc10g009570		Solyc06g048610
						Solyc09g064850	Solyc10g011680		Solyc06g048730
						Solyc09g064860	Solyc10g017890		Solyc06g048780
						Solyc09g064910	Solyc10g017930		Solyc06g048870
						Solyc09g064920	Solyc10g018030		Solyc06g048920
						Solyc09g065015	Solyc10g018540		Solyc06g048930
						Solyc09g065030	Solyc10g018640		Solyc06g048960
						Solyc09g065110	Solyc10g018920		Solyc06g048970
						Solyc09g065120	Solyc10g018990		Solyc06g050220
						Solyc09g065250	Solyc10g019000		Solyc06g050230
						Solyc09g065400	Solyc10g019010		Solyc06g050510
						Solyc09g065445	Solyc10g019150		Solyc06g050610
						Solyc09g065450	Solyc10g037877		Solyc06g050720
						Solyc09g065453	Solyc10g039270		Solyc06g050760
						Solyc09g065490	Solyc10g061960		Solyc06g050790
						Solyc09g065520	Solyc10g061980		Solyc06g050820
						Solyc09g065560	Solyc10g061995		Solyc06g050880
						Solyc09g065600	Solyc10g044543		Solyc06g051000
						Solyc09g065750	Solyc10g044840		Solyc06g051270
						Solyc09g065755	Solyc10g045290		Solyc06g051310
						Solyc09g065890	Solyc10g045457		Solyc06g051440
						Solyc09g065955	Solyc10g045530		Solyc06g051460
						Solyc09g066290	Solyc10g045555		Solyc06g051520
						Solyc09g066380	Solyc10g045750		Solyc06g051720
						Solyc09g066500	Solyc10g047240		Solyc06g051980
						Solyc09g072570	Solyc10g047390		Solyc06g051990
						Solyc09g072725	Solyc10g047400		Solyc06g052000
						Solyc09g074270	Solyc10g047430		Solyc06g052010
						Solyc09g074505	Solyc10g047450		Solyc06g053160
						Solyc09g074510	Solyc10g047772		Solyc06g053180
						Solyc09g074550	Solyc10g047890		Solyc06g053170
						Solyc09g074620	Solyc10g048010		Solyc06g053220
						Solyc09g074780	Solyc10g048155		Solyc06g053230
						Solyc09g075130	Solyc10g049230		Solyc06g053290
						Solyc09g075140	Solyc10g049280		Solyc06g053300
						Solyc09g075620	Solyc10g049340		Solyc06g053320
						Solyc09g075795	Solyc10g049720		Solyc06g053360
						Solyc09g075800	Solyc10g049920		Solyc06g053460
						Solyc09g075810	Solyc10g049930		Solyc06g053610
						Solyc09g082350	Solyc10g049970		Solyc06g053940
						Solyc09g082550	Solyc10g050040		Solyc06g054240
						Solyc09g082600	Solyc10g050110		Solyc06g054260
						Solyc09g082760	Solyc10g050580		Solyc06g054540
						Solyc09g082810	Solyc10g050700		Solyc06g054570
						Solyc09g083070	Solyc10g050760		Solyc06g054625
						Solyc09g083130	Solyc10g050990		Solyc06g059760
						Solyc09g089530	Solyc10g051370		Solyc06g059790
						Solyc09g089580	Solyc10g052490		Solyc06g059800
						Solyc09g090080	Solyc10g052680		Solyc06g059860
						Solyc09g090310	Solyc10g052795		Solyc06g059980
						Solyc09g090360	Solyc10g052840		Solyc06g059995
						Solyc09g090510	Solyc10g052862		Solyc06g060017
						Solyc09g090640	Solyc10g054080		Solyc06g060120
						Solyc09g090720	Solyc10g054090		Solyc06g060210
						Solyc09g090870	Solyc10g054290		Solyc06g060300
						Solyc09g090970	Solyc10g054480		Solyc06g060550
						Solyc09g091140	Solyc10g054760		Solyc06g060580
						Solyc09g091230	Solyc10g054790		Solyc06g060590
						Solyc09g091490	Solyc10g055070		Solyc06g060730
						Solyc09g091520	Solyc10g055080		Solyc06g060840
						Solyc09g091530	Solyc10g055300		Solyc06g060860
						Solyc09g091540	Solyc10g055330		Solyc06g060890
						Solyc09g091550	Solyc10g055545		Solyc06g060920
						Solyc09g091650	Solyc10g074360		Solyc06g060990
						Solyc09g091720	Solyc10g074530		Solyc06g061110
						Solyc09g091790	Solyc10g074570		Solyc06g061250
						Solyc09g091870	Solyc10g074630		Solyc06g062790
						Solyc09g092050	Solyc10g074790		Solyc06g062805
						Solyc09g092060	Solyc10g074830		Solyc06g062850
						Solyc09g092260	Solyc10g075140		Solyc06g062870
						Solyc09g092270	Solyc10g076200		Solyc06g062930
						Solyc09g092400	Solyc10g076300		Solyc06g063020
						Solyc09g092470	Solyc10g076400		Solyc06g063060
						Solyc09g092490	Solyc10g076425		Solyc06g063180
						Solyc09g092560	Solyc10g076430		Solyc06g063190
						Solyc09g092565	Solyc10g076440		Solyc06g063230
						Solyc09g092580	Solyc10g076570		Solyc06g063280
						Solyc09g092585	Solyc10g076610		Solyc06g063345
						Solyc09g092605	Solyc10g076760		Solyc06g063370
						Solyc09g097980	Solyc10g078220		Solyc06g064460
						Solyc09g098030	Solyc10g078520		Solyc06g064560
						Solyc09g098010	Solyc10g078570		Solyc06g064550
						Solyc09g098080	Solyc10g078880		Solyc06g064570
						Solyc09g098095	Solyc10g079140		Solyc06g064680
						Solyc09g098100	Solyc10g079220		Solyc06g064770
						Solyc09g098260	Solyc10g079275		Solyc06g064940
						Solyc09g098290	Solyc10g079310		Solyc06g065260
						Solyc09g098320	Solyc10g079450		Solyc06g065370
						Solyc09g098510	Solyc10g079940		Solyc06g065390
						Solyc09g098550	Solyc10g080020		Solyc06g065690
						Solyc10g005320	Solyc10g080395		Solyc06g066080
						Solyc10g005460	Solyc10g080580		Solyc06g066090
						Solyc10g005490	Solyc10g080660		Solyc06g066340
						Solyc10g005640	Solyc10g080670		Solyc06g066410
						Solyc10g005690	Solyc10g080890		Solyc06g066730
						Solyc10g005820	Solyc10g081360		Solyc06g066760
						Solyc10g006090	Solyc10g081370		Solyc06g066860
						Solyc10g006470	Solyc10g081430		Solyc06g067920
						Solyc10g006650	Solyc10g081540		Solyc06g067930
						Solyc10g006750	Solyc10g081580		Solyc06g068080
						Solyc10g006800	Solyc10g081830		Solyc06g068350
						Solyc10g006820	Solyc10g081970		Solyc06g068410
						Solyc10g006900	Solyc10g083080		Solyc06g068435
						Solyc10g006940	Solyc10g083150		Solyc06g068540
						Solyc10g007065	Solyc10g083220		Solyc06g068570
						Solyc10g007080	Solyc10g083240		Solyc06g068630
						Solyc10g007250	Solyc10g083530		Solyc06g068810
						Solyc10g007270	Solyc10g083670		Solyc06g068860
						Solyc10g007480	Solyc10g083800		Solyc06g068870
						Solyc10g007510	Solyc10g083830		Solyc06g068880
						Solyc10g008200	Solyc10g083850		Solyc06g068960
						Solyc10g008490	Solyc10g083900		Solyc06g069030
						Solyc10g008630	Solyc10g084090		Solyc06g069070
						Solyc10g008680	Solyc10g084110		Solyc06g069090
						Solyc10g008710	Solyc10g084280		Solyc06g069100
						Solyc10g008960	Solyc10g084340		Solyc06g069370
						Solyc10g009210	Solyc10g084430		Solyc06g069420
						Solyc10g009320	Solyc10g084440		Solyc06g069440
						Solyc10g009400	Solyc10g084610		Solyc06g069530
						Solyc10g009600	Solyc10g084830		Solyc06g069580
						Solyc10g011770	Solyc10g085010		Solyc06g069590
						Solyc10g011900	Solyc10g085030		Solyc06g069697
						Solyc10g012060	Solyc10g085285		Solyc06g069700
						Solyc10g012370	Solyc10g085250		Solyc06g069770
						Solyc10g017570	Solyc10g085540		Solyc06g069870
						Solyc10g017630	Solyc10g085640		Solyc06g070970
						Solyc10g017750	Solyc10g085670		Solyc06g071000
						Solyc10g017890	Solyc10g085700		Solyc06g071090
						Solyc10g017990	Solyc10g085740		Solyc06g071130
						Solyc10g018030	Solyc10g086110		Solyc06g071160
						Solyc10g018817	Solyc10g086137		Solyc06g071297
						Solyc10g018980	Solyc10g086170		Solyc06g071590
						Solyc10g018990	Solyc10g086450		Solyc06g071780
						Solyc10g019000	Solyc10g086510		Solyc06g071910
						Solyc10g019010	Solyc10g086580		Solyc06g071930
						Solyc10g019150	Solyc11g005170		Solyc06g071960
						Solyc10g019200	Solyc11g006390		Solyc06g071980
						Solyc10g019207	Solyc11g006570		Solyc06g071990
						Solyc10g024340	Solyc11g006730		Solyc06g072010
						Solyc10g037877	Solyc11g006840		Solyc06g072018
						Solyc10g037890	Solyc11g007010		Solyc06g072050
						Solyc10g038030	Solyc11g007110		Solyc06g072060
						Solyc10g039197	Solyc11g007140		Solyc06g072230
						Solyc10g039367	Solyc11g007350		Solyc06g072310
						Solyc10g039390	Solyc11g007700		Solyc06g072360
						Solyc10g061960	Solyc11g007710		Solyc06g072440
						Solyc10g061995	Solyc11g007720		Solyc06g072490
						Solyc10g062030	Solyc11g007870		Solyc06g072530
						Solyc10g062160	Solyc11g008020		Solyc06g072540
						Solyc10g062180	Solyc11g008030		Solyc06g072720
						Solyc10g062330	Solyc11g008150		Solyc06g072810
						Solyc10g044740	Solyc11g008240		Solyc06g072820
						Solyc10g045100	Solyc11g008430		Solyc06g072920
						Solyc10g045390	Solyc11g008550		Solyc06g072970
						Solyc10g045530	Solyc11g008610		Solyc06g072980
						Solyc10g046800	Solyc11g008780		Solyc06g073090
						Solyc10g046933	Solyc11g008900		Solyc06g073160
						Solyc10g047000	Solyc11g009000		Solyc06g073245
						Solyc10g047050	Solyc11g010410		Solyc06g073250
						Solyc10g047140	Solyc11g010440		Solyc06g073330
						Solyc10g047390	Solyc11g010450		Solyc06g073380
						Solyc10g047410	Solyc11g010600		Solyc06g073470
						Solyc10g047440	Solyc11g010610		Solyc06g073500
						Solyc10g047640	Solyc11g010750		Solyc06g073650
						Solyc10g047772	Solyc11g010950		Solyc06g073680
						Solyc10g049230	Solyc11g011260		Solyc06g073810
						Solyc10g049720	Solyc11g011370		Solyc06g074130
						Solyc10g049850	Solyc11g011502		Solyc06g074310
						Solyc10g050030	Solyc11g011570		Solyc06g074390
						Solyc10g050095	Solyc11g011615		Solyc06g074520
						Solyc10g050370	Solyc11g011740		Solyc06g074530
						Solyc10g050450	Solyc11g011840		Solyc06g074550
						Solyc10g050540	Solyc11g011860		Solyc06g074620
						Solyc10g050630	Solyc11g011930		Solyc06g074700
						Solyc10g050990	Solyc11g012455		Solyc06g074800
						Solyc10g051150	Solyc11g012530		Solyc06g074980
						Solyc10g051340	Solyc11g012640		Solyc06g075080
						Solyc10g052490	Solyc11g012710		Solyc06g075260
						Solyc10g052745	Solyc11g012780		Solyc06g075340
						Solyc10g052862	Solyc11g012890		Solyc06g075690
						Solyc10g054080	Solyc11g012970		Solyc06g075880
						Solyc10g054100	Solyc11g012980		Solyc06g076010
						Solyc10g054270	Solyc11g013020		Solyc06g076060
						Solyc10g054280	Solyc11g013050		Solyc06g076540
						Solyc10g054272	Solyc11g013220		Solyc06g076610
						Solyc10g054274	Solyc11g013310		Solyc06g076640
						Solyc10g054850	Solyc11g013490		Solyc06g076660
						Solyc10g054880	Solyc11g013690		Solyc06g076670
						Solyc10g055120	Solyc11g017280		Solyc06g076860
						Solyc10g055477	Solyc11g017400		Solyc06g082020
						Solyc10g055540	Solyc11g018620		Solyc06g082510
						Solyc10g055750	Solyc11g020860		Solyc06g082580
						Solyc10g074500	Solyc11g020950		Solyc06g082630
						Solyc10g074590	Solyc11g021010		Solyc06g082660
						Solyc10g074870	Solyc11g021070		Solyc06g082910
						Solyc10g074900	Solyc11g021080		Solyc06g082930
						Solyc10g074940	Solyc11g021085		Solyc06g083070
						Solyc10g075100	Solyc11g021090		Solyc06g083110
						Solyc10g076220	Solyc11g021100		Solyc06g083390
						Solyc10g076425	Solyc11g021130		Solyc06g083410
						Solyc10g076450	Solyc11g021140		Solyc06g083750
						Solyc10g076790	Solyc11g021220		Solyc06g083790
						Solyc10g078220	Solyc11g021240		Solyc06g084080
						Solyc10g078265	Solyc11g021250		Solyc06g084250
						Solyc10g078510	Solyc11g021260		Solyc06g084260
						Solyc10g078670	Solyc11g021270		Solyc06g084350
						Solyc10g078890	Solyc11g021280		Solyc06g084430
						Solyc10g079060	Solyc11g021290		Solyc06g084483
						Solyc10g079220	Solyc11g021300		Solyc06g084500
						Solyc10g079275	Solyc11g021310		Solyc06g084620
						Solyc10g079310	Solyc11g022610		Solyc07g005000
						Solyc10g079405	Solyc11g050770		Solyc07g005110
						Solyc10g079470	Solyc11g027690		Solyc07g005360
						Solyc10g079510	Solyc11g027760		Solyc07g005720
						Solyc10g079750	Solyc11g027770		Solyc07g005730
						Solyc10g080210	Solyc11g028150		Solyc07g005820
						Solyc10g080350	Solyc11g030810		Solyc07g005830
						Solyc10g080395	Solyc11g030890		Solyc07g005860
						Solyc10g080397	Solyc11g032040		Solyc07g005890
						Solyc10g080590	Solyc11g032120		Solyc07g005900
						Solyc10g081250	Solyc11g032133		Solyc07g005960
						Solyc10g081310	Solyc11g032140		Solyc07g006160
						Solyc10g081350	Solyc11g045680		Solyc07g006410
						Solyc10g081430	Solyc11g045160		Solyc07g006610
						Solyc10g081450	Solyc11g044690		Solyc07g006630
						Solyc10g081490	Solyc11g044680		Solyc07g006780
						Solyc10g081530	Solyc11g044620		Solyc07g006920
						Solyc10g081550	Solyc11g044632		Solyc07g006930
						Solyc10g081560	Solyc11g044610		Solyc07g006980
						Solyc10g081830	Solyc11g044636		Solyc07g007120
						Solyc10g081970	Solyc11g044595		Solyc07g007170
						Solyc10g083120	Solyc11g042620		Solyc07g007280
						Solyc10g083250	Solyc11g042420		Solyc07g007450
						Solyc10g083350	Solyc11g040150		Solyc07g007520
						Solyc10g083580	Solyc11g039970		Solyc07g007660
						Solyc10g083890	Solyc11g039580		Solyc07g007820
						Solyc10g083900	Solyc11g039360		Solyc07g007960
						Solyc10g083910	Solyc11g056280		Solyc07g007980
						Solyc10g084110	Solyc11g056330		Solyc07g007990
						Solyc10g084120	Solyc11g056350		Solyc07g008100
						Solyc10g084420	Solyc11g056430		Solyc07g008107
						Solyc10g084540	Solyc11g056510		Solyc07g008205
						Solyc10g087010	Solyc11g056520		Solyc07g008240
						Solyc10g084830	Solyc11g056530		Solyc07g008320
						Solyc10g084950	Solyc11g061700		Solyc07g008420
						Solyc10g084980	Solyc11g063510		Solyc07g008570
						Solyc10g085050	Solyc11g063520		Solyc07g008670
						Solyc10g085190	Solyc11g063540		Solyc07g008770
						Solyc10g085240	Solyc11g063580		Solyc07g008800
						Solyc10g085255	Solyc11g063720		Solyc07g008850
						Solyc10g085400	Solyc11g064830		Solyc07g008860
						Solyc10g085570	Solyc11g064920		Solyc07g008910
						Solyc10g085580	Solyc11g064990		Solyc07g009080
						Solyc10g085610	Solyc11g065190		Solyc07g009150
						Solyc10g085640	Solyc11g065600		Solyc07g009310
						Solyc10g085715	Solyc11g066010		Solyc07g009435
						Solyc10g085740	Solyc11g066065		Solyc07g009490
						Solyc10g085800	Solyc11g066100		Solyc07g017220
						Solyc10g086180	Solyc11g066560		Solyc07g017410
						Solyc10g086450	Solyc11g066670		Solyc07g017510
						Solyc10g086620	Solyc11g066760		Solyc07g017780
						Solyc11g005130	Solyc11g066830		Solyc07g017960
						Solyc11g005520	Solyc11g067320		Solyc07g018090
						Solyc11g005910	Solyc11g067340		Solyc07g018180
						Solyc11g006030	Solyc11g068390		Solyc07g019440
						Solyc11g006680	Solyc11g068480		Solyc07g019650
						Solyc11g007010	Solyc11g068500		Solyc07g019670
						Solyc11g007140	Solyc11g068510		Solyc07g020800
						Solyc11g007250	Solyc11g068520		Solyc07g021120
						Solyc11g007340	Solyc11g068610		Solyc07g022900
						Solyc11g007345	Solyc11g068730		Solyc07g022920
						Solyc11g007370	Solyc11g068870		Solyc07g025250
						Solyc11g007850	Solyc11g068900		Solyc07g025390
						Solyc11g008020	Solyc11g068930		Solyc07g026670
						Solyc11g008030	Solyc11g069010		Solyc07g026675
						Solyc11g008140	Solyc11g069240		Solyc07g027020
						Solyc11g008150	Solyc11g069250		Solyc07g037960
						Solyc11g008230	Solyc11g069350		Solyc07g038100
						Solyc11g008250	Solyc11g069480		Solyc07g038170
						Solyc11g008330	Solyc11g069800		Solyc07g038190
						Solyc11g008550	Solyc11g070110		Solyc07g039210
						Solyc11g008840	Solyc11g071220		Solyc07g039450
						Solyc11g008960	Solyc11g071370		Solyc07g039500
						Solyc11g009100	Solyc11g071535		Solyc07g039550
						Solyc11g010110	Solyc11g071580		Solyc07g040980
						Solyc11g010120	Solyc11g071650		Solyc07g041180
						Solyc11g010300	Solyc11g071810		Solyc07g041200
						Solyc11g010400	Solyc11g071890		Solyc07g041230
						Solyc11g010430	Solyc11g071900		Solyc07g041245
						Solyc11g010780	Solyc11g072650		Solyc07g041730
						Solyc11g010940	Solyc11g072990		Solyc07g041820
						Solyc11g011000	Solyc12g005180		Solyc07g042015
						Solyc11g011070	Solyc12g005460		Solyc07g042080
						Solyc11g011270	Solyc12g006140		Solyc07g042100
						Solyc11g011542	Solyc12g006160		Solyc07g042275
						Solyc11g011570	Solyc12g006670		Solyc07g042297
						Solyc11g011630	Solyc12g006840		Solyc07g042330
						Solyc11g011620	Solyc12g006930		Solyc07g042380
						Solyc11g011740	Solyc12g007040		Solyc07g042480
						Solyc11g011850	Solyc12g008570		Solyc07g042500
						Solyc11g011940	Solyc12g008630		Solyc07g042630
						Solyc11g012090	Solyc12g008710		Solyc07g042760
						Solyc11g012660	Solyc12g008790		Solyc07g042770
						Solyc11g012710	Solyc12g008960		Solyc07g042780
						Solyc11g012790	Solyc12g008970		Solyc07g042810
						Solyc11g012920	Solyc12g008990		Solyc07g042847
						Solyc11g012940	Solyc12g009050		Solyc07g042890
						Solyc11g013155	Solyc12g009250		Solyc07g043000
						Solyc11g013220	Solyc12g009370		Solyc07g043010
						Solyc11g013290	Solyc12g009810		Solyc07g043180
						Solyc11g013293	Solyc12g009870		Solyc07g043590
						Solyc11g013300	Solyc12g010110		Solyc07g043710
						Solyc11g013410	Solyc12g010330		Solyc07g044730
						Solyc11g013530	Solyc12g010450		Solyc07g044930
						Solyc11g013620	Solyc12g010510		Solyc07g044990
						Solyc11g013660	Solyc12g010520		Solyc07g045150
						Solyc11g016940	Solyc12g010680		Solyc07g045190
						Solyc11g017090	Solyc12g010730		Solyc07g045340
						Solyc11g017077	Solyc12g010800		Solyc07g045350
						Solyc11g017190	Solyc12g010910		Solyc07g045353
						Solyc11g018530	Solyc12g010940		Solyc07g045440
						Solyc11g018535	Solyc12g011000		Solyc07g045510
						Solyc11g018580	Solyc12g011350		Solyc07g045540
						Solyc11g018690	Solyc12g011440		Solyc07g047620
						Solyc11g018770	Solyc12g013490		Solyc07g047860
						Solyc11g018777	Solyc12g013770		Solyc07g048060
						Solyc11g018810	Solyc12g013780		Solyc07g048070
						Solyc11g018820	Solyc12g014000		Solyc07g048080
						Solyc11g019890	Solyc12g014080		Solyc07g048110
						Solyc11g020850	Solyc12g014220		Solyc07g049165
						Solyc11g020950	Solyc12g014320		Solyc07g049210
						Solyc11g020990	Solyc12g014330		Solyc07g049450
						Solyc11g021070	Solyc12g014430		Solyc07g049470
						Solyc11g021080	Solyc12g014560		Solyc07g049630
						Solyc11g021090	Solyc12g014570		Solyc07g049720
						Solyc11g021100	Solyc12g015810		Solyc07g051920
						Solyc11g021130	Solyc12g015865		Solyc07g052050
						Solyc11g021230	Solyc12g015980		Solyc07g052255
						Solyc11g021240	Solyc12g016190		Solyc07g052290
						Solyc11g021270	Solyc12g017260		Solyc07g052330
						Solyc11g021290	Solyc12g017360		Solyc07g052620
						Solyc11g021310	Solyc12g017460		Solyc07g052690
						Solyc11g022380	Solyc12g017500		Solyc07g052950
						Solyc11g022390	Solyc12g017860		Solyc07g052990
						Solyc11g022540	Solyc12g017885		Solyc07g053010
						Solyc11g022600	Solyc12g019370		Solyc07g053100
						Solyc11g050770	Solyc12g019550		Solyc07g053150
						Solyc11g027690	Solyc12g019590		Solyc07g053310
						Solyc11g027770	Solyc12g020000		Solyc07g053320
						Solyc11g027773	Solyc12g077548		Solyc07g053360
						Solyc11g028310	Solyc12g027753		Solyc07g053410
						Solyc11g028315	Solyc12g070110		Solyc07g053490
						Solyc11g030720	Solyc12g070130		Solyc07g053600
						Solyc11g030810	Solyc12g070280		Solyc07g053700
						Solyc11g030850	Solyc12g062170		Solyc07g053720
						Solyc11g030870	Solyc12g062600		Solyc07g054060
						Solyc11g031960	Solyc12g062610		Solyc07g054090
						Solyc11g032050	Solyc12g062595		Solyc07g054140
						Solyc11g032133	Solyc12g062640		Solyc07g054160
						Solyc11g032200	Solyc12g062650		Solyc07g054190
						Solyc11g045440	Solyc12g033050		Solyc07g054290
						Solyc11g045390	Solyc12g033060		Solyc07g054630
						Solyc11g045330	Solyc12g035800		Solyc07g054650
						Solyc11g045270	Solyc12g035990		Solyc07g054730
						Solyc11g045185	Solyc12g036640		Solyc07g054750
						Solyc11g045160	Solyc12g037980		Solyc07g054800
						Solyc11g044960	Solyc12g038430		Solyc07g054820
						Solyc11g044840	Solyc12g038680		Solyc07g054850
						Solyc11g044740	Solyc12g038800		Solyc07g054900
						Solyc11g044690	Solyc12g042700		Solyc07g054893
						Solyc11g044680	Solyc12g042750		Solyc07g055020
						Solyc11g044610	Solyc12g042800		Solyc07g055060
						Solyc11g044634	Solyc12g043020		Solyc07g055190
						Solyc11g044638	Solyc12g043050		Solyc07g055790
						Solyc11g044600	Solyc12g044240		Solyc07g055810
						Solyc11g044593	Solyc12g044260		Solyc07g055910
						Solyc11g044455	Solyc12g044330		Solyc07g055940
						Solyc11g043025	Solyc12g044890		Solyc07g055970
						Solyc11g042880	Solyc12g044920		Solyc07g055980
						Solyc11g042850	Solyc12g044980		Solyc07g056130
						Solyc11g042500	Solyc12g049030		Solyc07g056350
						Solyc11g040020	Solyc12g049050		Solyc07g056590
						Solyc11g039970	Solyc12g049070		Solyc07g061790
						Solyc11g039650	Solyc12g049180		Solyc07g061800
						Solyc11g039590	Solyc12g049310		Solyc07g061840
						Solyc11g056400	Solyc12g049320		Solyc07g062000
						Solyc11g056410	Solyc12g049350		Solyc07g062100
						Solyc11g056520	Solyc12g056060		Solyc07g062130
						Solyc11g061960	Solyc12g056090		Solyc07g062300
						Solyc11g061965	Solyc12g056200		Solyc07g062340
						Solyc11g062020	Solyc12g056250		Solyc07g062350
						Solyc11g062300	Solyc12g056340		Solyc07g062430
						Solyc11g062310	Solyc12g056380		Solyc07g062550
						Solyc11g063530	Solyc12g056410		Solyc07g062560
						Solyc11g063540	Solyc12g056500		Solyc07g062610
						Solyc11g063580	Solyc12g056527		Solyc07g062730
						Solyc11g063610	Solyc12g056610		Solyc07g062825
						Solyc11g063720	Solyc12g087870		Solyc07g062830
						Solyc11g064930	Solyc12g088090		Solyc07g062950
						Solyc11g065610	Solyc12g088080		Solyc07g063010
						Solyc11g065630	Solyc12g088170		Solyc07g063130
						Solyc11g065840	Solyc12g088310		Solyc07g063180
						Solyc11g066050	Solyc12g088360		Solyc07g063190
						Solyc11g066065	Solyc12g088400		Solyc07g063210
						Solyc11g066140	Solyc12g088470		Solyc07g063430
						Solyc11g066150	Solyc12g088570		Solyc07g063490
						Solyc11g066170	Solyc12g088670		Solyc07g063500
						Solyc11g066205	Solyc12g088680		Solyc07g063800
						Solyc11g066310	Solyc12g089010		Solyc07g063810
						Solyc11g066390	Solyc12g089220		Solyc07g063880
						Solyc11g066500	Solyc12g089300		Solyc07g063905
						Solyc11g066560	Solyc12g089310		Solyc07g064010
						Solyc11g066600	Solyc12g089320		Solyc07g064110
						Solyc11g066660	Solyc12g089340		Solyc07g064120
						Solyc11g066760	Solyc12g094390		Solyc07g064250
						Solyc11g066820	Solyc12g095750		Solyc07g064270
						Solyc11g067170	Solyc12g096820		Solyc07g064400
						Solyc11g067180	Solyc12g096850		Solyc07g064600
						Solyc11g067320	Solyc12g098150		Solyc07g064800
						Solyc11g067340	Solyc12g098195		Solyc07g064900
						Solyc11g068370	Solyc12g098230		Solyc07g064970
						Solyc11g068610	Solyc12g098250		Solyc07g065000
						Solyc11g068760	Solyc12g098260		Solyc07g065050
						Solyc11g068920	Solyc12g098270		Solyc07g065080
						Solyc11g069020	Solyc12g098600		Solyc07g065120
						Solyc11g069040	Solyc12g098750		Solyc07g065165
						Solyc11g069140	Solyc12g099600		Solyc07g065400
						Solyc11g069220	Solyc12g099670		Solyc07g065470
						Solyc11g069530	Solyc12g099730		Solyc07g065650
						Solyc11g069560	Solyc12g099800		Solyc07g065740
						Solyc11g069580			Solyc07g065735
						Solyc11g069800			Solyc07g066140
						Solyc11g069930			Solyc07g066260
						Solyc11g069925			Solyc07g066310
						Solyc11g070120			Solyc07g066480
						Solyc11g070160			Solyc07g066600
						Solyc11g071540			Solyc07g066660
						Solyc11g071650			Solyc08g005320
						Solyc11g071810			Solyc08g005590
						Solyc11g072020			Solyc08g005640
						Solyc11g072030			Solyc08g005990
						Solyc11g072200			Solyc08g006000
						Solyc11g072300			Solyc08g006060
						Solyc11g072560			Solyc08g006070
						Solyc11g072580			Solyc08g006150
						Solyc12g005180			Solyc08g006160
						Solyc12g005890			Solyc08g006220
						Solyc12g006450			Solyc08g006380
						Solyc12g006510			Solyc08g006390
						Solyc12g006530			Solyc08g006560
						Solyc12g006670			Solyc08g006650
						Solyc12g006690			Solyc08g006660
						Solyc12g006930			Solyc08g006670
						Solyc12g006960			Solyc08g006680
						Solyc12g006990			Solyc08g006730
						Solyc12g007030			Solyc08g006780
						Solyc12g007040			Solyc08g006990
						Solyc12g007070			Solyc08g007230
						Solyc12g007130			Solyc08g007440
						Solyc12g007150			Solyc08g007470
						Solyc12g007140			Solyc08g007500
						Solyc12g008340			Solyc08g007510
						Solyc12g008460			Solyc08g007580
						Solyc12g008490			Solyc08g007690
						Solyc12g008520			Solyc08g008140
						Solyc12g008690			Solyc08g008305
						Solyc12g008890			Solyc08g008320
						Solyc12g008900			Solyc08g008330
						Solyc12g008920			Solyc08g008340
						Solyc12g008980			Solyc08g008360
						Solyc12g009040			Solyc08g008425
						Solyc12g009170			Solyc08g008430
						Solyc12g009180			Solyc08g008440
						Solyc12g009530			Solyc08g008480
						Solyc12g009570			Solyc08g008485
						Solyc12g010070			Solyc08g008590
						Solyc12g010237			Solyc08g008600
						Solyc12g010500			Solyc08g008610
						Solyc12g010990			Solyc08g008630
						Solyc12g011040			Solyc08g013756
						Solyc12g011140			Solyc08g013820
						Solyc12g011330			Solyc08g013940
						Solyc12g013470			Solyc08g013970
						Solyc12g013490			Solyc08g013990
						Solyc12g013630			Solyc08g014040
						Solyc12g013665			Solyc08g014190
						Solyc12g013680			Solyc08g014350
						Solyc12g013780			Solyc08g014450
						Solyc12g013860			Solyc08g014470
						Solyc12g013970			Solyc08g015780
						Solyc12g014210			Solyc08g015940
						Solyc12g014200			Solyc08g016010
						Solyc12g014420			Solyc08g016270
						Solyc12g014430			Solyc08g016500
						Solyc12g014450			Solyc08g016670
						Solyc12g014560			Solyc08g048545
						Solyc12g014590			Solyc08g048500
						Solyc12g015895			Solyc08g044390
						Solyc12g016150			Solyc08g044260
						Solyc12g016165			Solyc08g043170
						Solyc12g017260			Solyc08g042130
						Solyc12g017360			Solyc08g041860
						Solyc12g017470			Solyc08g041850
						Solyc12g017510			Solyc08g023470
						Solyc12g017885			Solyc08g023280
						Solyc12g017920			Solyc08g023270
						Solyc12g018990			Solyc08g022030
						Solyc12g019110			Solyc08g021920
						Solyc12g019130			Solyc08g021890
						Solyc12g019180			Solyc08g029230
						Solyc12g019230			Solyc08g060860
						Solyc12g019320			Solyc08g061130
						Solyc12g019490			Solyc08g061220
						Solyc12g019623			Solyc08g061240
						Solyc12g019627			Solyc08g061273
						Solyc12g020050			Solyc08g061327
						Solyc12g020120			Solyc08g061850
						Solyc12g021170			Solyc08g061970
						Solyc12g082750			Solyc08g061980
						Solyc12g077590			Solyc08g062220
						Solyc12g076340			Solyc08g062330
						Solyc12g026430			Solyc08g062620
						Solyc12g027740			Solyc08g062630
						Solyc12g027770			Solyc08g062915
						Solyc12g027850			Solyc08g065220
						Solyc12g070080			Solyc08g065310
						Solyc12g070130			Solyc08g065330
						Solyc12g070280			Solyc08g065420
						Solyc12g062223			Solyc08g065470
						Solyc12g062450			Solyc08g065480
						Solyc12g062590			Solyc08g065760
						Solyc12g062650			Solyc08g065830
						Solyc12g062820			Solyc08g065990
						Solyc12g033050			Solyc08g066100
						Solyc12g033070			Solyc08g066160
						Solyc12g033130			Solyc08g066200
						Solyc12g035130			Solyc08g066230
						Solyc12g035720			Solyc08g066330
						Solyc12g035750			Solyc08g066420
						Solyc12g035790			Solyc08g066530
						Solyc12g036000			Solyc08g066680
[truncated: 868 more rows]

## Sheet: Table S3A
Table S3A. Output from Bayesian estimation of temporal regulation (BETR) algorithm to identify tomato genes differentially regulated following Botrytis cinerea infection of control plants. Raw P-values were subsequently adjusted for multiple hypothesis testing using using the Benjamini and Hochberg correction. Data following P-values are the log2-transformed Affymetrix signals for each treatment …
Affy Probe ID	Transcript ID	BETR P-value	B&H correction	Control 0h Mock Rep1	Control 0h Mock Rep2	Control 0h Mock Rep3	Control 0h Botrytis Rep1	Control 0h Botrytis Rep2	Control 0h Botrytis Rep3	BABA 0h Mock Rep1	BABA 0h Mock Rep2	BABA 0h Mock Rep3	BABA 0h Botrytis Rep1	BABA 0h Botrytis Rep2	BABA 0h Botrytis Rep3	Control 6h Mock Rep1	Control 6h Mock Rep2	Control 6h Mock Rep3	Control 6h Botrytis Rep1	Control 6h Botrytis Rep2	Control 6h Botrytis Rep3	BABA 6h Mock Rep1	BABA 6h Mock Rep3	BABA 6h Botrytis Rep1	BABA 6h Botrytis Rep2	BABA 6h Botrytis Rep3	Control 9h Mock Rep1	Control 9h Mock Rep2	Control 9h Mock Rep3	Control 9h Botrytis Rep1	Control 9h Botrytis Rep2	Control 9h Botrytis Rep3	BABA 9h Mock Rep1	BABA 9h Mock Rep2	BABA 9h Mock Rep3	BABA 9h Botrytis Rep1	BABA 9h Botrytis Rep2	BABA 9h Botrytis Rep3	Control 12h Mock Rep1	Control 12h Mock Rep2	Control 12h Mock Rep3	Control 12h Botrytis Rep1	Control 12h Botrytis Rep2	Control 12h Botrytis Rep3	BABA 12h Mock Rep1	BABA 12h Mock Rep2	BABA 12h Mock Rep3	BABA 12h Botrytis Rep1	BABA 12h Botrytis Rep2
Les.1101.1.A1_at	Les.1101.1	2.89679e-05	0.0010227	7.13556	7.55803	7.82106	8.36596	8.73808	8.8233	9.17761	8.81198	9.04	8.45398	8.51312	8.09239	7.77875	7.73007	7.52901	7.52313	8.03594	8.18181	7.62709	7.86292	7.76379	7.68632	7.74324	7.60476	8.00921	8.10707	7.21265	7.77422	7.50251	8.02159	7.63063	7.95416	7.44738	7.78302	7.75901	8.06898	7.57729	8.12731	7.65287	7.79465	8.20826	7.81787	7.44452	7.51764	7.88438	7.87006
Les.113.1.S1_at	Les.113.1	0	0	5.94448	6.23553	5.75001	6.60418	5.88324	6.07138	5.50414	5.3903	5.67671	6.16545	6.05831	6.263	7.98722	8.2683	7.72709	8.8815	8.88874	9.09094	7.90195	7.60483	7.285	9.45287	7.38627	7.21087	7.45082	6.2659	8.07912	7.64293	7.04135	7.02561	6.31667	7.38857	8.48859	8.53472	7.60603	6.8506	6.81924	7.75689	9.1262	9.22607	9.3	7.20526	6.0921	6.59192	8.68386	9.07961
Les.1175.1.S1_at	Les.1175.1	0.00122958	0.0250005	4.22753	3.99942	3.99664	4.09208	4.1133	4.25368	4.14894	4.1195	4.05516	4.20385	4.18547	4.0048	4.293	4.24637	4.00928	4.17517	4.41713	4.17929	4.02886	4.07149	4.25638	4.43176	3.96401	4.6593	4.36997	4.51886	5.18844	5.32355	5.21692	4.54529	4.19889	4.13805	3.94905	4.18432	4.42571	4.15761	4.18287	4.22426	5.01877	4.29158	4.12472	4.23825	4.10469	4.5041	4.14905	4.0475
Les.1192.1.A1_at	Les.1192.1	5.91278e-05	0.00184436	12.59	12.5516	12.6353	12.5687	12.5031	12.4885	12.5714	12.6172	12.5711	12.4754	12.4724	12.523	11.3937	11.2715	11.4161	11.1366	11.3769	10.9773	11.5138	11.5485	11.6463	11.575	11.5159	11.8399	11.7261	11.6949	11.8063	12.0205	11.9079	11.513	11.7353	11.8069	11.6302	11.9263	11.9797	11.693	11.5701	11.6638	11.2051	11.1552	11.2194	11.5808	11.8436	11.5094	11.8576	11.7085
Les.1197.2.A1_at	Les.1197.2	2.08616e-06	0.000104537	7.6457	7.70954	7.99558	9.34146	9.26401	9.19813	8.67313	8.59301	9.5804	9.23602	8.65706	8.90778	8.91188	8.4695	8.82491	9.12267	9.71269	8.94657	8.76323	8.81491	10.1745	9.21042	9.22952	8.57598	8.24776	9.09311	9.20418	9.40135	9.56426	9.08054	9.43814	8.43667	8.18823	8.198	8.85002	8.6863	9.55929	8.02743	8.79459	8.16391	8.06502	8.7224	9.3356	9.69762	7.62707	7.57049
Les.1205.3.S1_at	Les.1205.3	0.000165284	0.00445749	11.9607	11.7238	11.9305	11.6832	11.3047	11.3618	11.4445	11.6151	11.3945	11.3614	11.2613	11.2832	9.28197	8.83538	9.18129	8.29885	8.81451	8.72723	9.34726	8.87084	8.93069	8.98742	9.78588	7.4261	7.51885	7.26066	8.22812	7.96132	7.88234	7.07278	8.15936	7.6986	7.82375	7.64115	7.16497	7.56252	7.76682	7.88226	7.90876	7.40783	7.91874	8.22027	8.2504	8.50952	8.04107	7.84058
Les.1212.1.S1_at	Les.1212.1	0	0	12.5938	12.6185	12.691	12.6511	12.6421	12.7557	12.6671	12.681	12.6377	12.7034	12.6869	12.7504	12.2942	12.3353	12.3428	12.3661	12.4353	12.2656	12.1846	12.4049	12.632	12.4555	12.6256	11.7149	11.7657	11.9637	11.3621	11.5372	11.644	11.7162	11.7761	11.745	11.5525	11.5014	11.7255	11.7236	11.8688	11.6793	10.888	11.1087	11.3379	11.3516	11.8152	11.6905	11.5219	11.6026
Les.124.1.S1_at	Les.124.1	5.36442e-07	3.13274e-05	9.75112	10.4374	8.85517	7.56016	7.90434	7.86561	7.15043	6.36353	7.33291	6.72305	7.29616	6.75547	6.51007	7.22612	6.67324	6.73541	6.33542	6.40328	6.68487	6.58657	5.5949	6.26014	5.83412	6.63193	6.79422	5.97463	6.57708	6.35172	5.71309	6.39811	5.76227	6.68581	6.6934	6.73169	6.29507	6.20874	5.84419	6.7756	6.74521	6.93992	7.09062	6.65148	5.94913	6.27441	6.33502	6.8146
Les.129.1.S1_at	Les.129.1	0	0	4.85362	4.56742	4.493	4.82776	4.58744	4.395	4.52071	4.38031	4.40802	4.8174	4.21407	4.38921	8.48801	9.16714	7.75145	9.51183	8.92608	10.4056	8.1981	8.46973	7.09817	9.6283	7.67453	9.46233	9.18877	7.06202	10.9731	10.3081	9.57137	8.97351	7.19655	9.46316	11.1777	11.2413	10.0889	8.31714	7.76605	9.967	12.2029	12.6132	11.842	10.1446	6.32331	7.64927	11.6276	11.6133
Les.1296.1.A1_at	Les.1296.1	0.000428855	0.0102175	8.37527	8.22027	8.0578	8.49063	7.74443	8.29408	7.78685	7.74669	7.46553	8.00509	7.94723	8.30816	8.30642	8.15485	7.84424	8.32077	8.12699	8.23723	7.82145	7.89191	7.89533	8.2302	7.80485	8.58541	8.42413	8.31774	8.82705	9.04196	8.57405	8.2322	8.24491	8.48592	8.82587	8.79703	8.71837	8.41917	8.05219	8.6519	9.40849	9.06284	9.15851	8.87532	8.25441	8.34278	9.03759	9.01188
Les.13.1.S1_at	Les.13.1	0	0	6.2756	6.24154	6.04997	7.59671	7.45801	7.56272	5.76764	6.21463	6.83729	6.69889	6.52908	6.92188	6.02032	6.02622	6.36982	8.1542	7.26411	7.19542	7.29128	6.44757	8.08739	7.33361	7.59818	6.1554	6.07688	5.43232	7.07528	7.15668	6.25998	6.61468	6.92711	5.95748	6.61968	6.32275	6.85898	5.75013	6.07382	6.21229	7.06004	7.63527	6.47118	6.86378	5.96094	5.74091	6.70657	6.57365
Les.1310.1.S1_at	Les.1310.1	0.00198287	0.0372003	12.2389	12.2044	12.3368	12.3473	12.2582	12.2237	12.478	12.4718	12.3575	12.347	12.386	12.2437	12.4335	12.3892	12.6794	12.564	12.0274	11.8515	12.4814	12.3514	12.3555	11.9344	12.338	11.9682	11.9021	11.7374	12.6556	12.6996	12.4655	11.6546	12.4338	11.9684	12.1524	11.4795	12.3971	11.9912	12.6229	12.0158	12.2191	11.481	11.503	12.566	12.8328	12.4364	11.9921	11.825
Les.132.1.S1_at	Les.132.1	0.000867546	0.0186139	5.41035	5.98478	6.25888	5.01745	5.36764	5.44336	4.6181	4.79322	5.86266	4.62531	4.88571	5.6115	8.2083	8.63558	8.18363	9.11743	7.42895	8.77911	9.22215	8.58458	7.20449	9.17481	8.36549	9.89766	9.51825	8.58899	10.2888	10.3971	9.97057	10.1169	9.05212	8.97595	10.5696	10.4982	9.95772	9.12387	9.0474	10.2795	10.8716	11.1726	10.9391	10.5278	8.624	8.2914	10.3462	10.2676
Les.140.1.S1_at	Les.140.1	1.3113e-06	6.97595e-05	9.3064	9.10709	9.34039	9.41555	9.51403	9.36454	9.44212	9.2896	9.32551	9.14731	9.22503	9.16889	9.37778	9.26656	9.47288	10.1028	8.8491	9.21722	10.0374	9.5058	9.03838	8.9669	9.23203	9.03945	8.87193	8.16215	9.9619	9.71852	9.21444	8.55842	9.51364	8.9246	9.85519	9.36249	9.95362	8.10624	8.49799	8.98855	10.3849	10.5697	9.49118	10.0025	8.71735	8.55099	9.89684	9.9207
Les.145.1.S1_at	Les.145.1	0.000849903	0.0183366	9.8796	9.82868	9.64428	9.78628	9.77402	9.91108	9.5596	9.45792	9.39311	9.64873	9.65807	9.66956	10.3684	10.4511	10.4287	10.7193	10.3653	10.5307	10.3957	10.3827	10.1016	10.5935	10.2279	10.4829	10.528	10.4859	10.6663	10.5433	10.4056	10.7009	10.457	10.4253	10.496	10.4181	10.5922	10.4464	10.3974	10.4692	10.8279	11.0609	10.8629	10.4849	9.96541	10.3121	10.4574	10.6266
Les.1492.2.A1_at	Les.1492.2	0.00152606	0.0300073	12.7431	12.682	12.7781	12.7892	12.6155	12.6496	12.8275	12.7431	12.7321	12.7461	12.7286	12.7078	12.2906	11.8742	12.0322	12.0181	12.1552	11.9251	12.2193	11.9845	12.4731	12.3066	12.1806	11.545	11.3683	11.49	11.1088	11.6425	11.734	11.3029	11.319	11.3004	11.7301	11.623	11.5991	11.4932	11.4306	11.2487	10.8256	10.6208	10.7364	11.0055	11.5763	11.3208	11.5748	11.3152
Les.1501.1.A1_at	Les.1501.1	0.00265908	0.0471532	10.0248	9.66493	10.283	9.58109	9.08523	9.27935	9.00469	9.08515	9.48452	8.75726	8.33517	8.73332	10.8767	10.709	11.0452	11.1607	10.0668	10.0195	10.9154	10.7711	10.5457	9.38512	10.5327	11.9989	12.2185	11.6808	12.681	12.6657	12.5503	11.7853	12.412	12.2865	12.223	11.8903	12.2201	12.2464	12.6129	12.4196	12.292	11.8473	12.0227	12.6595	13.0772	12.7311	12.2853	12.2265
Les.1501.2.S1_at	Les.1501.2	0.00111109	0.0229517	8.37035	7.93045	8.47462	7.81163	7.4451	7.63331	7.64886	7.36383	7.71255	7.56551	6.79153	6.89659	9.40756	9.19047	9.69994	9.74685	8.50745	8.41729	9.61008	9.31926	9.25164	7.97549	9.0285	10.6663	10.8489	10.2174	11.5171	11.2746	11.5046	10.4909	11.0921	10.9622	11.1017	10.6005	10.9818	10.7366	11.1794	10.8064	10.6524	10.2607	10.3391	11.1498	11.6813	11.2463	10.7093	10.5079
Les.1510.1.S1_at	Les.1510.1	1.96695e-06	9.92034e-05	6.55168	6.55898	6.5894	6.29615	6.43984	6.44681	6.58763	6.26851	6.40844	6.61577	6.5524	6.52804	6.76034	6.98739	6.75703	6.88882	6.74163	6.7341	6.93327	6.72473	6.96665	6.68054	6.96278	7.00924	7.0869	6.92201	7.2427	7.30746	6.92702	7.18909	7.17169	6.9755	7.14182	7.04144	7.11263	6.82328	6.95685	7.07468	7.79841	7.5149	7.46899	7.67376	7.12726	7.01641	7.26854	7.18322
Les.1558.1.S1_at	Les.1558.1	4.83394e-05	0.00157753	8.91558	8.93927	8.7083	9.37023	9.17844	9.40944	9.11468	9.05189	9.18656	9.03228	9.45573	9.38814	9.19671	9.17018	9.1585	9.46896	9.0839	9.26737	9.35822	9.17685	8.69146	9.08606	8.67139	9.00496	8.96827	8.74338	8.96715	8.82094	8.62571	9.13669	8.6883	8.88315	9.29441	9.04035	8.64687	8.89733	8.72133	8.85692	9.18924	9.36712	9.18932	9.06761	8.44369	8.66367	9.2192	9.43913
Les.1606.1.S1_at	Les.1606.1	2.563e-06	0.000125993	9.95191	10.0689	10.091	11.3654	10.6357	10.9005	10.3323	10.3003	10.9567	11.3206	11.2745	11.2676	10.6311	11.1123	10.8173	10.6151	10.9358	11.0606	10.884	11.0769	9.95525	10.9899	10.3488	11.5382	12.0127	11.9915	11.3462	11.6144	11.1448	12.1325	11.0818	11.4408	11.6594	11.8347	11.4053	11.5684	11.105	11.6621	11.8512	12.1979	11.9765	11.3779	10.5875	11.0978	11.501	11.9691
Les.1609.1.S1_at	Les.1609.1	0.0012756	0.025801	7.52122	7.13685	7.10884	7.74534	8.82387	7.90759	9.02885	8.47841	8.23905	8.06503	8.05635	7.58903	6.72011	7.39388	7.29067	7.11841	6.84356	7.45048	7.20394	7.28713	5.56809	6.81657	6.30205	6.38907	6.98636	6.05186	6.49954	6.29831	6.13263	6.4128	6.00774	6.88625	7.16474	6.9882	6.04725	6.10181	5.8676	6.39177	6.8349	7.34472	6.96793	5.97797	5.72436	6.01389	6.79236	7.18294
Les.1610.1.S1_at	Les.1610.1	0.00164741	0.0319089	10.4188	10.7074	10.3051	11.3188	11.7213	11.1691	10.9857	11.2425	11.4813	11.3297	11.5012	10.7194	13.0014	13.0379	13.2158	13.2038	12.1539	12.7584	13.0679	12.9206	10.7167	12.1406	11.7637	13.2298	13.268	12.5605	13.3135	13.2068	13.0143	13.2931	13.1759	13.2418	13.3926	13.2451	12.6581	12.7426	12.825	12.8706	13.0357	12.9313	13.1176	13.3029	12.7806	12.8851	13.0105	13.1218
Les.1624.1.A1_at	Les.1624.1	7.7486e-07	4.36112e-05	9.19169	9.1988	9.17618	9.29085	9.06523	9.20042	9.10625	9.19548	9.22039	9.29684	9.31771	9.30545	9.50425	9.43958	9.45449	9.63169	9.61577	9.55542	9.53085	9.39261	9.74265	9.54739	9.59814	9.5376	9.36014	9.47272	9.88814	9.99736	9.83736	9.67793	9.72116	9.36634	9.70645	9.65576	9.61057	9.58381	9.74734	9.57739	10.0208	9.89816	9.77851	9.66822	9.76191	9.81789	9.6189	9.64511
Les.1664.1.S1_at	Les.1664.1	0.00228906	0.0416372	8.33202	8.26844	8.64776	8.74439	8.38703	8.43721	8.71631	8.44069	8.53209	8.7088	8.55689	8.54886	8.74062	8.60493	8.98135	9.08871	8.48689	8.43976	8.95865	8.7338	8.55054	8.73574	8.53254	8.6046	8.55598	8.01814	9.21452	9.2365	8.59467	8.56668	8.80838	8.54247	9.10711	8.71024	8.50639	7.92497	8.55364	8.38478	9.53591	9.3252	8.71672	9.1383	8.20907	8.58765	8.91193	8.69875
Les.1699.1.A1_at	Les.1699.1	1.42455e-05	0.000570334	10.095	9.90621	10.4146	12.0904	11.8591	11.3408	10.0516	9.75573	11.3226	9.8948	9.70083	9.61376	9.84874	9.38933	9.57	10.6515	9.44	9.94089	9.47026	9.66634	9.8523	9.39766	9.35438	9.97457	9.63226	9.98822	10.1823	9.83108	9.65436	9.99441	9.66597	10.0503	9.95655	10.2005	9.89206	9.6118	9.06474	9.77448	9.20431	10.3419	10.226	9.46369	9.27681	9.14961	9.9345	9.88851
Les.1699.2.S1_at	Les.1699.2	3.33786e-06	0.000162032	9.30611	9.1291	9.59789	11.2344	11.3872	10.6093	9.41728	9.00301	10.6367	9.32144	9.04373	8.88681	9.18222	8.90179	8.87292	9.93568	8.73383	9.14276	8.93282	9.05858	9.02476	8.96241	8.63678	8.92256	8.99682	9.22963	9.39102	8.65526	8.73	8.92218	8.99034	9.51093	9.05745	9.15497	9.04309	8.90718	8.22953	8.95329	8.56745	9.68756	9.29953	8.64869	8.5197	8.58558	9.01703	8.90363
Les.1719.1.A1_at	Les.1719.1	0.00110954	0.0229808	9.10654	9.6434	9.80236	9.13122	8.66425	8.82898	8.28484	8.93247	8.75196	7.94903	7.99586	8.27677	12.6885	12.4429	12.6103	12.6305	12.3407	12.3364	12.7879	12.4811	12.7706	12.6508	12.5835	12.7368	12.5281	12.6899	12.7948	12.9231	12.9776	12.9551	12.8052	12.4481	12.9325	12.6946	12.765	12.9272	12.9734	12.6441	12.5818	12.4226	12.5823	12.9085	12.7989	12.765	12.7474	12.4759
Les.1724.2.S1_at	Les.1724.2	9.53078e-05	0.00278292	8.83795	8.67801	8.93009	9.11894	8.83004	8.57846	8.97788	8.58321	8.89157	8.84329	8.97523	8.90344	9.15732	8.97085	9.31029	8.94589	8.71321	8.88297	9.37192	9.11886	9.12541	8.79813	8.70626	8.76244	8.59549	8.17852	9.82326	9.6049	9.37931	8.85236	9.19657	8.75966	9.72521	9.48244	9.84427	8.11696	8.96693	9.07315	10.23	9.8609	8.86276	9.8579	8.67119	8.77186	9.44686	9.43137
Les.176.1.S1_at	Les.176.1	0.000315249	0.00782281	11.1318	10.6517	10.3925	10.645	10.4681	10.7068	10.4397	10.1059	10.2901	10.3503	10.4472	10.491	11.0073	10.9318	10.9183	11.3767	10.781	10.9375	11.003	10.7714	10.8858	10.996	10.8619	10.8294	10.8447	10.5804	11.6447	11.2714	11.0614	10.9503	11.2443	10.8042	11.3028	11.0237	11.2053	10.5622	10.9624	10.8775	11.6963	11.6794	11.292	11.4047	10.9997	11.2362	11.2032	11.2627
Les.178.1.S1_at	Les.178.1	1.19209e-07	7.78066e-06	9.21871	9.18483	9.31745	9.10435	9.18941	9.05437	9.08515	9.56658	9.4392	9.03228	9.69083	9.19735	9.09848	8.79209	9.01241	9.28586	8.71665	8.91423	9.34805	9.18028	9.02044	8.76295	8.83568	8.41803	8.1937	7.51696	8.6447	8.51146	8.00752	8.02406	8.18195	8.2952	8.86488	8.85708	8.06158	7.58973	7.24258	8.44971	9.57217	9.67648	9.03133	8.50962	7.76202	7.68419	9.2966	9.1832
Les.1789.1.A1_at	Les.1789.1	0.00188202	0.0356527	6.79743	6.45685	6.93971	6.94688	6.81144	6.72416	6.91941	6.67995	6.86957	6.94398	6.90832	6.93581	7.08411	6.84565	6.91413	7.17807	6.83463	6.74402	7.16886	6.88236	6.58602	7.09842	6.78775	7.17396	6.99812	6.616	7.44776	7.3736	7.03472	6.90702	7.11386	7.13424	7.5039	7.14287	7.0651	6.66105	6.65458	7.05427	7.69055	7.72595	7.21918	7.30079	6.89474	6.87865	7.56839	7.44616
Les.1841.1.S1_at	Les.1841.1	1.19209e-07	7.8466e-06	9.06517	8.09926	7.13033	7.30349	7.67842	8.1535	7.48569	7.45936	7.16508	6.87627	7.53327	7.69816	7.18128	7.07754	6.91482	7.45372	7.68128	7.18432	7.86032	7.32252	8.29967	7.64305	7.88137	7.03624	6.99343	6.93075	8.18924	8.15571	8.01118	7.39664	7.84287	6.9822	7.90063	8.20725	7.9566	6.96317	7.32995	7.00579	8.92042	8.71287	8.43556	7.32898	7.19211	7.06093	8.64321	8.2993
Les.2021.1.A1_at	Les.2021.1	0	0	8.04206	8.08501	8.16447	8.18731	8.16364	7.94517	8.84156	8.15278	8.2792	8.82148	8.83672	8.56522	7.17465	6.78931	6.75417	6.9119	6.90977	6.80719	7.34752	7.05911	6.89417	7.69759	7.18694	6.33079	5.94679	5.88565	7.27895	7.38467	6.20641	6.6525	6.14701	6.23182	7.22511	7.04349	7.01987	5.79026	6.22344	6.99652	8.92273	8.34436	7.58937	7.73643	5.96348	6.0048	8.25803	8.00562
Les.2033.3.S1_at	Les.2033.3	0.000147462	0.00404713	10.4655	10.3949	10.4097	9.99332	10.2153	9.95873	9.37285	10.3298	9.89727	9.82971	9.78959	9.94398	10.8163	10.7709	10.4976	10.3651	10.8801	10.4505	10.5381	10.7264	10.4958	10.6342	10.5819	10.4445	10.5628	10.7008	9.88603	9.94385	10.1185	10.4889	9.982	10.3452	10.1871	10.4723	10.2158	10.3913	10.1346	10.2666	9.98157	10.0197	10.3062	9.73305	9.95508	10.1321	9.89451	10.2467
Les.2055.1.S1_at	Les.2055.1	0.00127733	0.0257688	10.1562	9.85452	9.39062	9.22234	9.52625	9.47766	9.38447	8.98235	9.12096	9.14406	9.37577	9.23325	8.61408	8.48827	8.5721	8.85872	8.91751	8.79863	8.62045	8.50701	8.91536	8.95009	8.86628	8.53354	8.48496	8.55485	8.8501	8.96991	8.64301	8.75839	8.79539	8.36689	8.76832	8.71126	8.69495	8.54582	8.78294	8.47037	9.05173	9.05843	8.92343	8.73008	8.48171	8.56897	8.77881	8.74864
Les.2073.3.A1_at	Les.2073.3	0.000520945	0.0120422	10.4184	10.3599	10.5391	10.36	10.179	10.1898	10.3311	10.2773	10.3813	10.1517	10.1949	10.2485	10.7187	10.5977	10.569	10.843	10.5424	10.4848	10.6954	10.6183	10.7063	10.7819	10.6326	10.5954	10.6123	10.3404	11.3532	11.2791	11.0222	10.6572	11.1008	10.3893	10.7446	10.5841	10.9218	10.4598	10.9319	10.5949	11.1156	10.8372	10.5465	11.1075	10.781	10.7741	10.6789	10.4846
Les.209.1.S1_at	Les.209.1	1.30534e-05	0.000542171	11.5443	11.5199	11.587	11.699	11.6792	11.6793	11.6411	11.6343	11.7279	11.7945	11.8097	11.8402	12.5495	12.661	12.5918	12.7419	12.4962	12.6888	12.5704	12.5604	12.0323	12.6024	12.1192	12.6324	12.6972	12.1602	12.8924	12.6741	12.3254	12.3078	12.2444	12.5956	12.8874	12.7586	12.5041	12.3029	12.1078	12.6644	13.2634	13.3648	13.0514	12.81	12.0471	12.2935	13.0129	13.1409
Les.214.1.S1_at	Les.214.1	7.99894e-05	0.00239876	6.65057	6.81852	6.76719	6.78919	7.06437	6.81598	6.84825	6.87825	6.84528	7.25	6.97759	6.99398	6.37028	6.80185	6.50148	5.99271	6.19249	5.96964	6.11362	6.17793	5.80255	5.92129	5.70925	6.34388	6.3545	5.65243	6.6068	6.2386	5.51722	6.5461	5.7224	6.69058	7.36908	6.2706	5.32082	6.25426	5.9002	6.27932	7.85733	7.27693	6.94654	6.80769	5.63774	5.8365	7.43646	7.4145
Les.2140.1.A1_at	Les.2140.1	0.00176436	0.0336702	9.05476	9.16024	9.23589	8.93105	9.11388	9.05399	8.90753	9.07543	9.08587	9.00911	9.10852	9.19208	9.42334	9.35	9.38713	9.37619	9.65775	9.55416	9.38923	9.58063	9.93597	9.31271	9.71078	9.55162	9.69419	10.0568	9.01172	9.49386	10.0595	9.68056	9.78832	9.42862	9.34694	9.60087	9.8939	10.0992	10.1301	9.75686	8.90657	9.10978	9.38549	9.19699	10.3142	9.88918	9.54546	9.54495
Les.2182.1.A1_at	Les.2182.1	5.96046e-08	4.0969e-06	10.2012	10.0782	10.2267	10.1815	10.0871	10.0358	10.0302	9.97806	10.185	10.2204	9.95109	10.1618	11.113	11.1147	11.1221	11.3244	10.8859	11.1787	11.1496	11.1803	10.8082	10.9135	10.7685	10.9358	11.0659	10.5307	11.5054	11.1954	10.9339	10.6495	10.83	10.9609	11.3806	11.1744	11.1061	10.5909	10.7834	11.0866	12.0102	12.1199	11.5729	11.2924	10.8101	10.8819	11.5899	11.6887
Les.2182.2.S1_at	Les.2182.2	3.39746e-05	0.0011728	7.41511	7.29499	7.42979	7.20374	7.30343	7.34104	7.33049	7.32861	7.51754	7.33744	7.34164	7.5285	8.12627	8.7478	8.61293	8.41476	8.11336	8.67313	8.41974	8.63228	7.79648	8.10125	8.41082	8.21954	8.53926	8.17858	8.94394	7.97367	8.49077	7.86121	8.40639	8.67161	8.52819	8.3613	8.56695	8.03907	8.15627	8.33617	9.51845	9.65664	8.93483	8.51138	8.02972	8.09277	8.91908	9.00314
Les.2182.3.S1_at	Les.2182.3	8.9407e-07	4.89031e-05	7.42409	7.47294	7.62516	7.20152	7.51284	7.46122	7.40747	7.47602	7.61464	7.5036	7.42685	7.68239	8.4458	8.70417	8.87938	8.76672	8.25888	8.88289	8.58043	8.69524	8.2409	8.28524	8.40767	8.33829	8.60714	8.25434	8.99561	8.28491	8.48117	8.1386	8.55464	8.82697	8.83662	8.64943	8.72494	8.12888	8.40664	8.59996	9.6488	9.79654	9.25501	8.87568	8.34315	8.4385	9.18173	9.39367
Les.220.1.S1_at	Les.220.1	1.84774e-06	9.50426e-05	8.78473	8.8827	8.85962	9.79938	9.72118	9.53814	8.97999	9.00807	9.52687	9.38491	9.00913	9.34667	10.1579	10.2743	10.2578	10.2375	10.0177	10.6704	10.2664	10.5236	10.3763	10.4554	10.5022	10.3406	10.7291	11.125	10.0921	10.3682	10.1383	11.1095	10.4476	10.3895	10.1597	10.403	11.1307	10.5406	10.405	10.3428	10.5662	11.0797	10.7915	10.2932	9.85926	10.2493	10.1119	10.4614
Les.2278.1.S1_at	Les.2278.1	0	0	6.01412	5.75737	6.65012	6.48953	6.1115	6.60993	6.15882	7.08628	6.84605	6.08646	5.97974	5.66275	7.16067	6.95932	7.00062	7.83935	6.68572	7.26114	7.6325	6.62161	7.37896	7.28082	6.97491	7.50939	7.08165	6.24781	9.53077	9.56179	8.7391	7.62569	8.92063	7.65383	9.08327	8.41752	8.89058	7.48426	8.25551	8.18859	9.84789	9.71236	8.61375	9.08344	8.53948	7.78807	9.21971	8.81605
Les.2286.1.S1_at	Les.2286.1	1.39475e-05	0.000564219	12.6757	12.6767	12.5938	12.5805	12.6955	12.6676	12.6054	12.6827	12.6555	12.6069	12.694	12.6275	12.1179	12.0376	12.1189	11.9707	12.373	12.0904	11.9757	12.073	12.2058	12.2863	12.4013	11.8563	11.8905	12.0529	11.4701	11.6082	11.7551	11.7333	11.8588	11.9615	11.7825	11.8317	11.7917	11.8899	11.6676	11.6658	11.1079	11.3133	11.2526	11.0826	11.8061	11.7863	11.7355	11.5849
Les.2294.2.A1_a_at	Les.2294.2	4.76837e-07	2.82717e-05	9.87344	10.2472	9.48187	10.8461	10.685	10.9318	10.564	10.4876	11.1983	10.9729	10.8695	10.8129	10.2379	10.3856	10.3881	10.1777	10.2713	10.4787	10.2592	9.64258	10.1171	10.7335	10.2076	10.3166	10.4208	10.2593	10.4596	10.5911	10.4436	10.5877	10.1864	10.2145	10.2296	10.3059	9.14479	10.0801	10.0683	10.2467	10.2227	10.7176	10.1959	10.2177	9.69319	9.94315	10.0732	10.0119
Les.2341.1.A1_at	Les.2341.1	1.96695e-06	9.98518e-05	5.14637	5.4031	5.19175	4.11716	3.88359	4.33619	4.39783	3.94352	4.22878	4.71533	4.3911	4.48852	7.3002	7.42621	7.59988	7.46789	8.06609	7.37512	7.68817	7.80692	8.80176	8.08313	8.26794	9.4273	9.01778	9.37489	8.54593	9.39332	9.6106	9.67175	9.10737	8.51208	8.67046	8.69048	8.99919	8.9643	9.41418	8.45443	7.83809	7.87663	8.14571	7.80708	8.43837	8.33449	7.83092	7.82835
Les.2355.1.S1_at	Les.2355.1	0.000743687	0.0165035	8.73835	8.70215	8.69335	8.4143	8.78198	8.63068	8.48085	8.45872	8.42154	8.52644	8.44279	8.72091	8.94442	9.01889	8.86432	8.97905	8.9593	8.8884	8.90758	8.99135	9.01101	8.95934	8.98535	9.34127	9.45737	9.62591	8.84555	9.2048	9.31384	9.53106	9.15975	9.2153	9.15922	9.23588	9.2059	9.50693	9.59709	9.41989	8.93547	8.98818	9.19782	8.94244	9.275	9.35055	8.99616	9.05067
Les.2377.1.S1_at	Les.2377.1	0.00102705	0.0216768	13.9617	13.962	13.9687	13.9396	13.9681	13.9551	13.9958	13.9808	14.0439	13.9564	14.0036	14.004	13.7188	13.5081	13.6576	13.3684	13.8628	13.6523	13.6735	13.5636	14.0256	13.8364	13.9818	13.5111	13.3787	13.6308	13.2274	13.3277	13.5047	13.3066	13.429	13.4511	13.3713	13.4079	13.4259	13.5065	13.3926	13.1343	12.8585	12.7097	12.7635	12.7856	13.5987	13.4411	13.4041	13.2443
Les.246.1.S1_at	Les.246.1	8.88109e-06	0.000389714	9.66654	9.58843	9.78208	9.48963	9.46006	9.46366	9.33162	9.88347	10.0001	9.62928	9.46423	9.69859	9.76334	9.81393	9.89422	9.96048	9.39305	9.62676	9.80334	9.78164	9.89135	9.69289	9.61701	9.4203	9.45176	8.95915	10.2109	9.97676	9.48164	9.5213	9.38414	9.62551	9.91352	9.83584	9.96659	8.86784	9.53702	9.68322	10.4753	10.7358	10.0389	10.1026	9.49006	9.52895	9.98234	10.1196
Les.2478.1.S1_a_at	Les.2478.1	0.000330865	0.00810672	14.7851	14.8424	14.8502	14.7915	14.8033	14.8284	14.7792	14.7905	14.8282	14.7626	14.8002	14.8054	14.7542	14.7395	14.7774	14.7572	14.7782	14.7444	14.7199	14.6857	14.7385	14.7505	14.7399	11.7349	10.6427	10.7488	10.8797	11.1808	11.3889	10.7325	11.6341	11.9613	11.9085	11.3448	10.1721	10.9308	10.8277	11.027	10.2051	9.85101	9.0299	9.82734	11.9044	11.1574	11.5892	11.126
Les.2478.1.S1_at	Les.2478.1	4.20213e-05	0.0014129	13.9662	14.0089	13.9672	13.9296	13.9295	13.9287	13.9258	13.9659	13.9222	13.9176	13.9369	13.9163	13.8889	13.8806	13.8153	13.8344	13.8655	13.9804	13.7526	13.7449	13.916	13.9777	13.888	11.0385	9.9108	10.7562	10.0242	10.6171	11.0518	10.3248	11.1131	11.5129	11.1073	10.957	10.0161	10.8505	10.6689	10.5333	9.85894	9.01253	8.99202	9.4917	11.4784	10.7629	11.3737	10.9155
Les.2526.1.S1_at	Les.2526.1	0	0	5.56283	5.21166	5.58266	5.54975	5.54445	5.37071	5.26514	5.62549	5.46421	5.44492	5.75853	5.54607	5.8267	5.7074	5.664	6.00373	6.20328	6.16336	6.04336	5.67145	5.9109	6.55164	5.83934	5.73298	6.02196	5.77624	6.68014	6.84642	6.25892	5.86635	5.34705	5.89881	7.43875	6.94351	6.30591	5.28063	6.12307	5.6954	7.7054	7.59848	7.27112	5.6611	5.30626	5.57392	7.31005	7.38179
Les.2539.1.A1_at	Les.2539.1	0.0004704	0.0110381	8.85124	8.68491	8.90433	8.76581	8.57259	9.03933	9.04526	9.11614	8.79195	9.15269	9.12751	9.17179	8.26103	8.03802	7.9932	7.88885	7.98741	7.75243	8.00942	7.87864	8.08186	8.35937	8.32318	8.51953	8.48694	8.59594	8.58337	8.67214	8.59213	8.6017	8.34877	8.2712	8.32387	8.38764	8.36279	8.70181	8.55867	8.43928	8.03319	7.37073	8.07753	8.26278	8.62601	8.81677	8.22995	8.06772
Les.254.1.S1_at	Les.254.1	0	0	8.07109	7.6404	7.08184	7.89263	7.51474	8.22394	7.92852	6.89409	7.39838	8.13427	8.84334	9.12987	8.25366	7.62639	7.15064	9.7096	9.58807	10.0518	8.07166	7.46673	8.96048	9.70982	8.62511	7.49532	7.05716	6.80038	8.79705	7.91254	8.70531	6.96654	6.53575	5.91191	9.00524	9.28963	8.68564	7.00126	7.31333	6.74346	10.7179	10.6316	10.151	7.63982	6.5944	7.43396	10.0028	10.5587
Les.2541.2.S1_at	Les.2541.2	0.00224876	0.0410004	9.14052	8.98198	8.96017	9.12654	9.02472	8.77075	8.99804	8.81902	8.97891	9.03888	9.04651	8.8397	9.78089	9.93168	9.97542	9.97672	9.57974	9.83358	9.91357	9.86841	9.51432	9.63249	9.61995	9.94484	10.1388	9.73186	10.2209	10.2051	9.9869	10.0815	10.1448	10.1364	10.1314	10.0062	10.2423	9.75608	9.68397	9.8011	10.4354	10.3523	10.1414	10.2551	9.68737	9.67778	10.0957	10.0079
Les.2560.1.S1_at	Les.2560.1	0.000512063	0.0119078	9.66012	9.89234	9.32769	10.8104	9.00276	10.0923	9.81549	8.06602	9.01438	9.61224	9.65019	10.9059	12.4357	12.3699	11.933	12.9617	12.2132	12.2433	12.7467	12.5352	12.622	12.6232	12.7441	12.7366	12.5165	12.4816	13.8896	13.4321	13.3564	13.0998	13.4479	12.5004	13.3569	13.181	13.6306	12.2915	12.7204	12.9078	13.9521	13.8492	13.569	13.8194	12.6444	12.5816	13.5184	13.4614
Les.2579.1.A1_at	Les.2579.1	1.19209e-07	7.98188e-06	11.1207	11.1919	11.0564	11.2879	10.9	11.1657	11.0484	11.0165	11.2177	11.2825	11.2056	11.1514	12.0845	11.9773	11.972	12.2436	11.5014	12.0927	12.2205	11.9988	11.5047	11.6026	11.6689	11.9153	11.9136	11.4117	12.5091	12.5356	11.9119	11.9973	12.0808	12.0225	12.615	12.3544	12.1691	11.762	11.569	12.2146	13.2458	13.1321	12.842	12.7441	11.6078	11.8097	12.9032	12.8284
Les.2620.1.S1_at	Les.2620.1	8.97646e-05	0.00267127	13.8948	13.8362	13.8634	13.9049	13.7805	13.8357	13.9138	13.9077	13.8696	13.8528	13.9052	13.8433	13.8017	13.5272	13.6084	13.4996	13.8221	13.5735	13.7469	13.6348	13.9243	13.8047	13.8509	13.4682	13.1268	13.5421	13.0693	13.3489	13.6362	13.2199	13.3164	13.3002	13.5915	13.5143	13.3739	13.3698	13.2189	13.0677	12.6054	12.423	12.404	12.6266	13.4793	13.2724	13.3273	12.9873
Les.2620.2.S1_at	Les.2620.2	0.000450134	0.0106591	13.3953	13.4058	13.43	13.2863	13.4443	13.4211	13.4271	13.5395	13.4787	13.4163	13.4691	13.5335	13.112	12.8033	12.9612	12.7339	13.256	12.7096	13.0129	12.9163	13.2759	13.3177	13.3531	12.3779	12.0493	12.6028	12.0588	12.1245	12.573	12.1386	12.3644	12.2467	12.4396	12.3576	12.3028	12.0826	12.0902	11.8445	11.1779	11.3825	10.9428	11.201	12.5443	12.2677	12.0579	11.8534
Les.2667.2.S1_at	Les.2667.2	0	0	11.4752	11.3776	10.7192	9.9729	10.3841	10.2008	9.77486	9.26264	9.71259	9.76451	10.0126	9.82239	10.0345	10.2517	9.95029	10.3402	10.2642	10.5876	10.0718	9.95205	9.94481	10.4192	10.0024	9.7226	10.0669	9.88909	9.89345	9.81814	9.82742	10.1657	9.80937	9.78835	9.8351	10.0206	9.94765	9.90368	9.5328	9.68442	10.1695	10.5649	10.1654	9.54756	9.03521	9.40723	9.75039	9.98571
Les.2667.3.S1_at	Les.2667.3	0	0	6.92364	6.99817	6.55169	5.56732	6.0346	6.0213	5.61709	5.48043	5.64922	5.3897	5.90662	5.66663	6.98604	6.60075	6.54777	7.05324	7.0574	6.97159	6.89801	6.43928	6.77122	7.39199	6.42551	6.87286	6.76767	6.44213	6.80297	6.74385	6.78653	7.05399	6.50825	6.31646	6.78785	6.98732	6.46805	5.83016	5.78836	5.99182	6.1056	6.56974	6.15371	5.54632	5.06117	5.3992	5.66965	6.22184
Les.2668.2.A1_at	Les.2668.2	0	0	4.933	5.27596	4.67722	6.04646	5.60757	5.82995	4.69237	4.5505	4.8069	4.82883	4.88945	4.88762	4.73039	4.90671	4.76738	6.3456	5.9976	6.68248	4.63656	5.21658	7.47579	6.52363	6.21211	5.6079	5.04922	6.90773	7.07467	6.96197	7.36618	6.6364	7.12178	5.56328	6.58904	6.45697	7.84756	6.05072	7.16789	5.2295	8.12039	8.9344	7.39369	5.87701	6.99752	5.60981	7.43915	7.49755
Les.2708.1.S1_at	Les.2708.1	0	0	10.2838	10.2291	10.5607	10.2637	10.3903	10.4191	10.6395	10.5282	10.6409	10.5098	10.5261	10.6038	11.78	11.9258	11.7314	12.067	11.4042	11.8789	12.0044	11.8645	11.0388	11.6378	11.4637	12.1326	11.9834	11.6146	12.8368	12.7897	12.275	12.285	12.3247	11.9282	12.8625	12.7502	12.6356	11.3817	11.7666	12.3867	13.569	13.5018	12.8987	12.6829	11.1094	11.2943	12.8807	12.8208
Les.2708.2.S1_at	Les.2708.2	3.57628e-07	2.18716e-05	10.8082	10.5004	10.842	10.856	10.6953	10.6355	11.0932	11.0406	10.9974	10.8984	10.8809	10.9847	12.1679	12.1464	11.9453	12.265	11.4564	12.1773	12.3063	12.1056	11.3768	11.9185	11.7594	12.5441	12.1977	11.8228	12.9343	13.0175	12.6612	12.577	12.5083	11.9852	13.1807	13.1569	13.0179	11.8128	12.0472	12.5549	13.5118	13.2622	13.13	13.0119	11.4288	11.4945	13.1262	13.2063
Les.2717.1.S1_at	Les.2717.1	0.00146699	0.0291409	9.43407	9.16877	9.49056	9.6128	9.65387	9.30484	9.72235	9.69573	9.69075	9.7124	9.70091	9.72186	10.2099	9.92314	9.96667	10.2526	9.55923	9.87519	10.3399	9.80401	9.3812	9.76707	9.4584	9.69344	9.62374	9.08317	9.9739	9.78359	9.40175	9.46946	9.54021	9.65199	10.301	10.1192	9.75647	9.17472	9.11996	9.84792	10.4595	10.4636	10.1213	10.06	9.2186	9.48224	10.1603	10.2142
Les.2738.1.S1_at	Les.2738.1	0.0017702	0.0336988	9.6796	9.2855	9.16512	9.90719	10.0216	10.0156	9.77972	9.38483	9.5198	9.78592	10.0262	9.91563	8.81368	8.78721	9.0939	9.01525	8.80239	8.49211	8.96004	8.8823	8.59702	8.41274	8.62541	9.52258	9.59854	9.56291	9.48854	9.61207	9.62812	9.46627	9.73819	9.53388	9.66264	9.42478	9.26526	9.47742	9.88313	9.68446	9.374	9.44175	9.36846	9.73518	9.68035	9.4965	9.40965	9.29364
Les.2747.1.S1_at	Les.2747.1	2.98023e-07	1.8518e-05	8.211	7.98777	8.12505	9.01352	8.3412	8.74481	8.55039	7.8731	8.54812	8.62092	8.45503	8.71062	8.70969	8.31678	8.50913	9.21562	8.62168	8.28123	9.14198	8.61652	9.14655	8.80547	8.84246	7.82092	7.41372	7.47463	8.47929	8.53208	8.19486	7.72255	8.23074	7.36975	7.80497	7.72424	8.37307	7.02304	7.52232	7.50015	8.89338	8.34471	8.01573	8.86754	8.38673	8.38005	8.1791	8.24975
Les.2747.2.S1_at	Les.2747.2	5.36442e-07	3.15647e-05	8.33929	8.3639	8.33406	9.19559	8.67724	9.09246	8.78071	8.38722	8.85761	8.80545	8.81805	8.98007	8.9953	8.80195	8.98549	9.50916	8.99513	8.74369	9.56987	9.05674	9.27318	8.82939	9.4553	7.99803	8.06324	8.03519	8.93127	8.74364	8.46709	8.06095	8.75206	7.98076	8.42142	7.92887	8.94379	7.6909	7.93911	7.93753	9.28402	8.74023	8.25491	9.21768	8.63684	8.78697	8.60428	8.60056
Les.275.1.S1_at	Les.275.1	5.48363e-06	0.000250537	8.71844	8.98089	9.42688	9.34003	8.82967	8.93172	9.29441	8.63917	9.38617	9.33228	9.04004	9.65496	12.0717	12.1	12.0068	12.4379	11.925	12.6276	12.2913	12.1943	11.674	11.8921	11.9559	12.4399	12.1911	11.7971	13.0161	12.337	12.0375	12.3332	12.3914	12.3985	12.9362	12.7917	12.2479	11.8232	12.1036	12.7169	13.7962	13.8551	13.43	13.1507	11.6065	12.4645	13.3342	13.1746
Les.281.1.S1_at	Les.281.1	5.96046e-07	3.45485e-05	10.3996	10.175	10.4161	10.6472	10.454	10.5738	10.6779	10.3888	10.6425	10.4169	11.0367	11.2733	11.3997	11.5132	11.3356	11.7674	11.6367	11.8843	11.4655	11.8253	11.569	11.8089	11.4302	11.536	11.7788	11.6339	11.5579	11.531	11.5406	11.548	11.3261	11.425	11.823	11.8374	11.9044	11.6135	11.2874	11.626	11.9473	12.2027	12.0181	11.3812	11.2312	11.2847	11.8976	12.0706
Les.2817.1.S1_at	Les.2817.1	0	0	7.83733	7.6828	8.03218	7.70215	7.99943	7.89338	7.6927	8.08474	7.83732	7.79767	7.71901	7.99069	8.27832	8.44431	8.66023	8.97547	8.25541	8.56086	8.56694	8.21479	8.45527	8.64729	8.49969	8.03325	8.0106	7.78771	9.80069	8.7509	8.73622	7.74324	9.0396	8.55118	9.20997	9.09511	9.26074	7.5653	8.17355	8.46077	10.6103	10.6993	9.90111	8.4689	8.37714	7.95008	9.80818	10.0693
Les.2817.2.S1_at	Les.2817.2	0	0	6.12283	6.12825	6.03723	6.09797	5.97625	5.9243	6.13658	5.98848	5.99232	5.66106	5.88978	5.93294	6.03694	6.2959	6.50286	6.73325	6.21249	6.56562	6.35129	6.15321	6.4268	6.15938	6.50206	5.73131	5.84135	5.85162	7.37643	6.21781	6.68133	5.55316	6.63104	6.48355	6.63337	6.7818	6.83302	5.59616	6.31252	6.6197	8.53331	8.32325	7.98621	6.53937	6.3044	5.9855	7.76566	8.2276
Les.2839.1.S1_at	Les.2839.1	6.55651e-07	3.74444e-05	5.12519	5.00482	5.13272	5.20044	4.92402	4.81195	5.18438	5.03583	4.99542	5.27756	5.05806	5.04204	5.25503	4.99997	5.96874	6.58024	5.90012	5.5063	5.93554	5.40683	5.42559	5.6038	6.39583	7.05801	5.34919	5.67052	6.1848	6.97628	6.4495	5.89143	5.55329	5.78618	6.76713	6.20952	5.69749	5.15076	6.02227	5.68416	8.98556	8.45277	7.12086	6.11928	5.86154	5.36529	7.37629	7.21959
Les.2842.2.A1_at	Les.2842.2	0.000161111	0.00439071	5.36555	5.31596	4.70154	5.60407	4.85267	4.88049	4.94806	4.72426	4.84609	5.34531	4.78216	5.05202	5.64919	5.42287	5.77956	6.03776	5.78315	5.45127	6.5779	6.09262	5.7612	5.44906	5.8978	5.8543	5.81464	5.53677	6.59171	7.03919	6.1097	6.20083	6.78783	5.72021	6.33487	5.74551	6.94209	5.71514	6.05451	6.3812	7.21194	7.16488	6.73567	7.25784	5.9691	5.88873	6.97444	6.54006
Les.2844.2.A1_at	Les.2844.2	0.000796497	0.0175252	8.03194	7.91933	7.91094	7.87237	7.21889	7.52783	7.70478	7.6155	7.28612	7.62809	7.50705	7.68064	7.55616	6.98338	7.37966	7.89002	7.69137	6.68997	7.71626	7.2334	8.76996	6.87604	7.97037	8.84944	8.1041	8.58352	9.96531	9.7485	10.3074	8.33846	9.22094	8.01735	8.64578	8.23289	9.29254	9.16734	10.0676	8.35517	8.96775	7.4425	7.73662	9.02579	10.2337	10.2104	8.33064	8.0258
Les.2845.2.S1_at	Les.2845.2	0	0	7.39506	7.4847	7.23914	7.998	8.05232	8.08888	8.41139	8.36888	8.21357	8.12823	8.60199	8.31797	7.20146	7.51304	7.55374	7.54334	7.34907	7.64591	7.29517	7.31842	7.00525	7.21409	7.08557	7.04387	7.247	7.47886	7.14353	7.02589	6.75637	7.16962	7.1942	7.34627	7.46048	7.40459	6.98495	7.07732	7.10399	7.29313	7.57905	7.78312	7.62183	7.49397	7.06943	7.05789	7.50928	7.536
Les.2845.3.S1_at	Les.2845.3	3.74317e-05	0.00126405	8.27638	8.38054	8.11402	8.50311	9.02804	8.99067	9.09385	8.75338	9.00603	8.89282	9.19723	8.96492	8.26647	8.49122	8.30806	8.33627	8.29995	8.33273	8.3006	8.14805	8.13203	8.11167	8.01972	8.25969	8.23537	8.28623	7.92408	8.04467	7.94063	8.194	8.07773	8.08429	8.33891	8.26397	8.08883	8.20481	7.97265	8.20654	8.25232	8.50526	8.29238	8.2416	7.88346	8.18652	8.28753	8.38882
Les.2855.1.S1_at	Les.2855.1	0.00182146	0.0345899	10.2209	9.91381	9.86354	10.1963	10.1449	10.2716	10.2169	9.64314	9.99293	10.0125	10.2134	10.27	9.77681	10.0489	10.0073	9.98612	9.79817	9.76574	9.83332	10.0691	9.57521	9.79371	9.81984	9.99457	10.1362	9.79352	10.4284	10.2348	10.0118	9.93365	10.2306	10.0183	10.1351	9.93157	10.1113	9.87406	9.74981	10.0152	10.6322	10.406	10.2526	10.5829	9.99645	10.0175	10.1111	10.2531
Les.2915.2.S1_at	Les.2915.2	0.00233394	0.0422557	9.62795	10.2659	9.81909	9.58114	9.84533	9.60508	9.62605	9.28293	9.40428	9.58442	8.85274	9.10108	9.64153	9.81228	9.34782	9.39228	10.0597	10.3843	9.09058	9.5606	9.26989	10.1513	9.25942	9.10071	9.48557	9.53938	8.32504	8.33751	8.43097	9.24198	8.93398	9.04641	8.56276	9.13314	8.83526	9.42234	9.03744	9.1868	8.78543	9.28603	9.62342	8.45105	8.43454	9.06449	8.71467	9.25226
Les.292.1.S1_at	Les.292.1	0.000255048	0.00653782	11.7718	11.6108	11.3454	11.8099	11.5785	11.799	11.666	11.1333	11.2148	11.5234	11.5426	11.6278	11.5516	11.6144	11.5586	11.8604	11.2279	11.4123	11.616	11.4948	11.3378	11.5201	11.3542	11.4687	11.3429	11.2967	12.1387	11.7899	11.5743	11.4644	11.8293	11.1979	11.6506	11.49	11.7449	11.2016	11.5119	11.2597	12.2408	12.1793	11.7296	11.981	11.4488	11.5395	11.5931	11.7439
Les.2921.1.S1_at	Les.2921.1	0.000112414	0.00323379	12.9475	13.0965	12.9115	12.9706	13.0257	13.046	12.9657	12.6734	12.7176	12.8417	12.8761	13.0105	11.8799	12.0354	11.7016	11.9237	12.4974	12.2589	11.6781	11.6962	12.5571	12.4903	12.3808	11.2615	11.2569	12.066	10.5249	10.5944	10.5677	11.7356	11.2725	10.5268	10.1564	10.5354	10.8484	11.5774	11.4936	10.7657	10.3367	10.7175	11.0283	10.2475	10.6354	11.1713	10.2182	10.719
Les.293.1.S1_at	Les.293.1	0.000529587	0.0122057	6.79435	6.8489	7.20034	7.20853	6.62126	7.04057	7.73418	6.5451	6.81801	6.70724	6.41278	6.68028	6.82074	6.41278	6.48494	6.83805	7.24943	5.88034	6.70509	6.08439	8.05731	7.36591	7.72134	6.66278	6.35743	7.0744	9.2872	8.56249	8.56486	7.41618	8.70903	6.01048	7.36973	7.65459	8.60077	8.03283	8.71887	6.22421	10.5442	9.02743	8.13384	8.33403	10.0496	10.7106	8.28114	8.6261
Les.2934.2.S1_at	Les.2934.2	6.56247e-05	0.00199885	6.55443	6.64127	6.93134	6.18003	6.5737	6.56673	6.41037	6.62933	6.70721	6.05357	6.05149	6.06583	5.28876	5.49244	5.1939	5.38538	5.47299	5.24885	5.26338	5.25643	6.63711	5.61596	6.27938	5.22787	5.36443	5.36742	6.03894	5.60611	5.8592	5.0266	6.10241	5.38148	5.55457	5.13207	6.09314	5.45008	5.82325	5.48362	5.20793	5.01464	4.82172	6.09723	6.4644	5.62456	5.24709	4.96826
Les.2954.2.A1_at	Les.2954.2	0.00144327	0.0288171	9.65622	9.66902	9.80725	9.76698	9.78123	9.73204	9.67849	9.79652	9.81299	9.68058	9.73459	9.58153	9.89207	9.78076	9.81981	9.86598	9.5588	9.84681	10.0037	9.8223	10.2119	9.5537	9.86398	9.73525	9.81659	9.57644	10.1134	10.3529	10.0437	9.82822	9.97281	9.70566	9.96061	9.81311	10.024	9.67742	9.89499	9.89939	10.2727	10.0636	9.96705	10.2904	10.0439	9.92815	9.88482	9.9034
Les.2973.1.S1_at	Les.2973.1	0.000716925	0.0159552	11.8572	11.5091	11.8811	11.9356	11.411	11.5524	11.7548	11.5256	11.622	11.5358	11.3798	11.4673	11.6196	11.4612	11.9058	11.9869	10.6096	10.657	11.4729	11.7173	11.4042	10.685	11.4054	11.3033	11.3466	10.8577	12.2179	12.2163	11.9227	10.9207	11.7478	11.5469	11.8424	11.5231	12.0283	10.9611	11.2463	11.5538	12.4488	12.2482	11.6496	12.119	11.7558	11.6835	11.8722	11.9784
Les.2988.1.S1_at	Les.2988.1	0	0	9.67261	9.49814	9.98447	10.0371	10.0496	10.2265	10.5577	10.3617	10.5521	10.0194	10.7471	10.7358	10.1562	9.84231	9.97598	11.0213	10.5259	10.7388	10.1556	9.80332	10.3107	10.8217	10.1263	10.0869	9.82484	9.53933	11.2444	10.411	10.4356	9.55192	10.2475	10.0404	10.8542	10.6283	10.7985	9.40225	9.75072	9.91297	11.8785	11.8878	11.3206	10.448	9.77387	9.93434	11.3499	11.591
Les.3018.1.S1_at	Les.3018.1	0	0	8.65498	8.90601	8.83869	8.80554	8.59213	8.79705	8.63429	8.41413	8.535	8.38467	8.65283	8.71635	10.7168	10.5544	10.3754	10.8399	10.3859	10.912	10.6621	10.7555	10.3774	10.6019	10.5423	11.1028	11.0532	10.7532	12.0024	11.9011	11.5106	11.2374	11.5249	11.3714	11.6968	11.7986	12.0415	10.569	10.5963	11.3513	12.4804	12.5113	11.8317	11.683	10.6402	10.4075	12.0187	11.8387
Les.3038.1.S1_at	Les.3038.1	0.00209951	0.0389187	13.6273	13.6877	13.6608	13.589	13.774	13.702	13.7545	13.7837	13.761	13.7438	13.8185	13.7632	13.5025	13.3557	13.4286	13.3103	13.664	13.3361	13.3982	13.3582	13.4895	13.6114	13.6128	13.2239	13.1205	13.3684	12.8943	12.9778	13.0832	12.999	13.2106	13.1864	13.2354	13.2122	13.1803	13.01	13.0395	12.8222	12.5304	12.621	12.446	12.5082	13.1128	13.1983	12.9473	12.8074
Les.3039.1.S1_at	Les.3039.1	0	0	10.1742	10.1308	10.2189	10.1686	10.5163	10.249	10.4061	10.4029	10.5263	10.3866	10.598	10.7553	12.0827	12.2347	12.001	12.5704	12.0194	12.1942	12.2097	11.9845	11.5881	12.4294	11.977	11.9429	11.8897	11.3658	12.4795	12.181	11.6716	11.3092	11.4704	11.6187	12.5499	12.2844	12.0314	11.2441	11.2261	12.0502	13.2154	13.2534	12.6703	12.2723	11.157	11.3591	12.6437	12.8317
Les.3059.1.S1_at	Les.3059.1	6.02007e-06	0.000271848	8.73129	8.58301	8.63651	8.60385	8.73687	8.66371	8.62305	8.79921	8.70202	8.56922	8.69391	8.68635	9.22422	9.2516	9.14229	9.30108	9.26535	9.16887	9.5216	9.32272	9.37487	9.0654	9.13097	9.5425	9.64221	9.769	9.56869	9.73564	9.83453	9.70525	9.74088	9.62212	9.6232	9.43021	9.69823	9.61464	9.76511	9.49313	9.1613	8.94263	9.07386	9.49584	9.86725	9.4457	9.32052	9.12702
Les.3084.1.S1_at	Les.3084.1	0.000450015	0.0106889	9.9266	10.0715	10.0491	10.2607	10.5877	10.4793	10.3315	10.3739	10.2784	10.0361	10.1364	10.013	9.58913	9.70373	9.72196	9.5103	9.89713	9.90916	9.34636	9.70639	9.64634	9.95113	9.64773	8.4787	8.80584	8.79963	8.03078	8.11607	8.08355	8.74365	8.61636	8.56668	8.1905	8.18928	8.09212	8.61465	8.46834	8.28971	7.82435	8.16153	8.58784	7.96635	8.11256	8.15893	8.01037	8.37923
Les.3101.3.A1_at	Les.3101.3	0.000554502	0.0126671	11.2893	11.0774	11.1771	11.1013	11.1305	11.2097	11.3324	11.0742	11.1165	11.3109	11.1286	11.2181	11.4778	11.3415	11.3207	11.8258	10.9394	11.5273	11.7731	11.3003	11.0131	11.2026	11.0787	11.4341	11.0417	10.7338	11.7749	11.4711	11.4118	10.8224	11.5296	11.2814	11.4832	11.5618	11.6504	10.7681	10.97	11.3228	12.1022	12.0744	11.5657	12.0059	11.0697	11.0448	11.5784	11.91
Les.3119.3.S1_at	Les.3119.3	0.00203055	0.0378208	12.9199	12.8444	12.9855	12.9037	12.8418	12.8518	13.0556	13.1898	12.9816	13.0088	13.0141	13.0116	12.6034	12.4059	12.6214	12.3056	12.4943	12.344	12.4604	12.516	12.7025	12.3821	12.7119	11.1194	11.0651	11.2549	10.9298	10.9987	11.4534	10.3764	11.2977	11.6113	11.2169	11.1866	11.2233	10.9217	10.7951	10.7617	10.4841	9.96888	10.2101	10.6412	11.3323	10.8833	11.3585	10.9791
Les.3123.1.S1_at	Les.3123.1	2.43783e-05	0.000893143	14.1551	14.0721	14.0017	14.0973	14.0539	14.0312	14.1352	14.0426	14.025	13.8629	14.0495	14.0064	13.5155	13.1996	13.3989	13.3212	13.7613	13.2734	13.3814	13.1291	13.8785	13.6016	13.8359	12.33	11.8998	12.3458	12.3165	12.6233	12.7411	11.6645	12.355	12.1699	12.5265	12.1386	12.2214	12.5111	12.4167	12.281	11.9453	10.95	11.2002	12.1431	13.2012	12.5141	12.7806	12.1337
Les.3134.1.S1_at	Les.3134.1	0.00158846	0.030844	4.5265	4.24575	4.41419	4.73702	4.30809	4.59048	4.48149	4.38792	4.48497	4.90231	4.40359	4.7517	4.37228	4.34875	4.42195	4.65688	4.61009	4.60162	4.62852	4.49724	4.69331	4.81734	4.39345	4.36454	4.53721	4.28713	5.36574	4.75285	4.89073	4.34826	4.94305	4.49566	4.49926	4.50674	4.16324	4.11219	4.25451	4.40473	4.39909	4.46437	4.25793	4.1844	4.42584	4.56311	4.37815	4.46037
Les.314.1.A1_at	Les.314.1	3.48687e-05	0.00119834	11.0331	11.2105	11.4005	11.2102	11.6895	11.3439	11.3246	11.9529	11.5682	11.5266	11.615	11.3195	9.93219	9.33798	10.0254	9.68471	9.81747	9.8853	9.68327	9.82695	9.62962	9.49047	9.7018	9.81674	9.63561	9.86412	9.93732	10.2161	10.2378	9.38198	10.3038	9.84602	10.019	9.76475	10.1925	10.0322	9.99574	9.85916	9.00101	9.17206	9.30326	9.66359	10.2582	9.72975	9.786	9.72004
Les.3140.2.S1_at	Les.3140.2	2.72989e-05	0.0009771	7.02926	7.0112	6.93339	7.75379	7.26891	7.6059	7.55077	7.12918	7.46825	7.62034	7.4725	7.54867	7.48147	7.43754	7.54931	7.86212	7.30306	7.07913	7.92319	7.77176	7.48355	7.4549	8.13119	6.49767	6.83891	6.65447	7.58488	6.90049	7.11059	6.78143	7.4358	6.56453	6.72217	6.56281	7.2977	5.89401	6.34311	6.45093	7.82212	7.09943	6.85994	7.69695	7.12344	7.30077	7.13831	7.07899
Les.3140.3.S1_at	Les.3140.3	7.15256e-07	4.05503e-05	7.65047	7.68703	7.63694	8.24997	7.79503	8.24555	8.10357	7.75258	8.11932	8.16286	8.09557	8.20644	8.01638	8.22239	8.29464	8.58893	7.87107	7.96468	8.72201	8.29258	8.38459	7.90055	8.68551	7.12473	7.48158	7.31163	8.12188	7.80869	7.78513	7.56157	8.03155	7.39916	7.55817	7.20754	8.16142	6.92761	7.30345	7.26971	8.47898	8.00471	7.80158	8.44685	7.94939	8.07321	7.94133	7.98061
Les.3160.2.S1_at	Les.3160.2	4.58956e-06	0.000212185	11.3259	11.3054	11.1646	10.9211	10.8011	10.6084	10.9585	10.4817	10.6148	10.1887	10.348	10.2357	10.2427	10.3541	10.4647	11.0732	9.8175	9.99867	10.7339	10.0673	9.89701	10.2249	10.258	10.3799	10.243	9.82459	11.6194	11.4518	10.9809	10.3508	11.5411	10.2001	10.8753	10.5783	11.3247	9.98075	10.5255	10.365	11.3646	11.1337	10.6849	11.1125	10.5178	10.2558	10.7851	10.9023
Les.3160.3.S1_at	Les.3160.3	1.20997e-05	0.000510754	10.6522	10.7014	10.3761	10.0597	9.99307	9.83484	10.2685	9.7932	9.77868	9.5478	9.62993	9.47284	9.26677	9.70849	9.87149	10.0033	8.81191	9.45559	9.8566	9.28692	8.99593	9.10027	9.70777	9.3354	9.438	9.38332	10.8367	10.3349	10.1468	9.4607	10.9027	9.72135	9.97752	9.68221	10.5165	9.35144	9.79857	9.59019	10.7763	10.2892	9.9124	10.3647	9.85264	9.4257	10.1839	10.2815
Les.3180.2.S1_at	Les.3180.2	2.31862e-05	0.000861662	10.5927	10.4381	10.7167	10.5274	10.6429	10.4462	10.8139	11.09	10.7866	10.4295	10.6263	10.4598	8.94616	8.73737	9.19306	8.89678	8.41355	8.32958	9.10263	8.73849	8.96776	8.43589	8.76991	8.59688	8.58803	8.31507	9.28906	9.10648	9.0951	8.12756	8.88121	8.93852	8.71659	8.35959	8.99814	8.56445	8.55016	8.74227	8.50126	8.11184	8.25572	9.05242	9.32461	8.66175	8.93827	8.71926
Les.3180.3.A1_at	Les.3180.3	0.0026238	0.0466339	12.885	12.717	12.9405	12.9849	12.735	12.7561	12.9804	12.9214	12.8551	12.7402	12.7867	12.6145	11.6137	11.1863	11.7549	11.4975	11.1411	10.9749	11.7075	11.3157	11.4406	11.2273	11.3343	11.3451	11.2729	11.0293	11.8691	12.2045	11.8209	10.7983	11.4757	11.4773	11.7545	11.2524	11.6088	11.2436	11.3602	11.6128	11.474	10.7598	11.0429	11.9523	11.9855	11.4821	11.8195	11.4045
Les.321.1.S1_at	Les.321.1	0.000149667	0.00409319	11.1284	10.9912	11.2825	10.9287	11.0375	10.8178	11.2649	11.0596	11.2009	10.8653	10.8465	10.7163	10.6178	10.5673	10.8162	11.0725	10.5639	10.6378	10.9859	10.5562	10.8421	10.5591	10.7644	11.076	10.992	11.0273	12.0152	12.0148	11.9168	11.2983	12.0404	11.109	11.2841	11.0025	12.0146	11.1136	11.5936	11.037	11.7553	11.3168	10.8388	11.6379	11.7801	11.3215	11.1858	10.9393
Les.3233.1.S1_at	Les.3233.1	1.34706e-05	0.000550666	8.68285	8.89885	9.40055	10.0862	10.2519	10.0645	9.97108	9.79805	10.3245	10.1261	9.89105	9.9268	9.80757	9.9638	9.46486	9.41767	9.8289	10.4108	9.35105	9.81952	8.79331	9.83241	8.67922	9.69506	9.83684	9.75761	9.36348	9.26035	9.34169	9.7479	9.37547	9.5125	9.35724	9.69961	8.98627	10.0034	9.69977	9.68573	9.33857	9.70704	10.0008	9.01761	9.49663	10.0886	9.29265	9.76379
Les.3237.1.S1_at	Les.3237.1	0.000624299	0.0140957	10.7913	10.7461	10.9083	10.9125	10.8436	10.7934	10.9279	11.0815	10.8958	10.7986	11.0146	10.903	10.8656	10.5419	10.6959	10.4727	10.8897	10.5353	10.7195	10.6473	10.7472	10.7757	10.7712	10.1658	10.1245	10.1951	9.93156	10.2433	10.398	9.90162	10.1181	10.3706	10.5868	10.3976	10.3327	10.1416	9.98512	10.0837	9.43067	9.51102	9.46551	9.6568	10.38	10.1358	10.2625	10.0638
Les.3242.1.A1_at	Les.3242.1	0.000192583	0.00508772	13.6406	13.6125	13.7646	13.742	13.6546	13.7	13.7325	13.8385	13.8279	13.6425	13.7881	13.7419	13.2327	12.7317	13.0158	12.8892	12.8781	12.5244	13.2183	12.9288	13.0496	13.3034	13.0926	11.9869	11.553	11.7928	11.2824	11.6009	11.8134	11.4446	11.7522	11.8368	11.8115	11.9202	11.6862	11.4753	10.9157	11.1552	10.5255	9.90531	10.4384	10.7541	11.5382	11.2486	11.5488	11.2569
Les.3242.2.S1_at	Les.3242.2	1.56164e-05	0.000612589	12.6385	12.8315	12.7075	12.5939	12.8411	12.7533	12.829	13.1246	12.8445	12.5856	12.8937	12.7343	11.8102	11.7404	12.0627	11.5231	11.6482	11.6126	12.0145	11.7909	11.7894	11.8858	12.3724	10.3847	10.4132	10.732	9.77994	9.82233	10.4228	10.0982	10.6822	10.7954	10.5302	10.2884	10.4258	10.1961	9.71424	9.69525	9.31122	8.91576	9.13207	9.41863	10.3754	10.1421	10.1413	9.96391
Les.3242.3.S1_at	Les.3242.3	1.19209e-07	8.05129e-06	12.8075	12.9692	12.918	12.8737	13.1431	12.9935	12.9785	13.2961	13.0036	12.8534	13.0428	12.9165	11.9357	11.7603	12.0532	11.6646	11.8368	11.5442	12.1369	11.7984	11.9912	12.2862	12.3777	10.5001	10.5224	10.687	9.83324	10.1879	10.2923	10.1235	10.7301	10.8279	10.7496	10.4059	10.4207	10.3925	9.90496	9.92439	9.5044	9.14374	9.30061	9.72353	10.5	10.2405	10.3755	10.0698
Les.3280.1.A1_at	Les.3280.1	0.000129223	0.00362337	13.1324	13.0224	13.1034	13.2029	12.8833	12.9354	13.0934	12.7362	12.688	12.7441	12.737	12.7391	11.128	11.1044	11.2821	11.133	11.0352	11.159	11.2127	11.1939	11.662	11.2805	11.5564	11.6238	11.8016	11.8063	12.3091	12.5445	12.1687	11.6292	11.7742	11.7786	12.101	11.9128	12.4587	11.9862	11.8817	12.1361	12.2028	11.9485	12.0198	12.4519	12.4431	11.9656	12.1769	12.1287
Les.3286.1.S1_at	Les.3286.1	5.31673e-05	0.00169242	7.31928	7.31535	9.30429	11.9606	10.2036	11.0749	8.6342	9.08898	11.0692	10.3966	8.74655	12.5615	12.9802	12.2546	12.8764	13.3237	13.7722	12.6742	13.1698	13.2117	13.5832	13.5777	13.5818	12.2874	11.7601	13.0363	13.0563	11.3127	12.3404	12.9257	13.1665	13.1648	11.6932	12.0105	12.2458	12.1831	12.8531	11.4945	10.3366	12.4175	11.1356	11.4582	11.6692	11.5894	12.1727	10.1396
Les.3289.1.S1_at	Les.3289.1	2.38419e-07	1.49338e-05	9.0692	9.00016	9.01742	9.05702	8.80406	8.9583	8.8092	8.5719	8.89375	9.0744	9.007	9.00704	10.6998	10.6339	10.6006	11.026	10.2386	10.6526	10.5046	10.3705	9.93487	10.3916	10.0847	10.3736	10.6403	10.2914	11.147	11.0122	10.7045	10.5425	10.7351	10.5408	10.8305	10.7708	10.7316	10.2536	10.314	10.6595	11.5006	11.3784	11.1107	11.0445	10.4886	11.075	10.8397	10.9478
Les.3299.1.S1_at	Les.3299.1	0	0	4.33797	4.53929	4.27884	7.04596	6.07078	6.44373	4.81556	4.80808	5.77719	4.81138	4.58618	4.77575	4.87375	4.84225	4.94335	5.12722	5.20427	5.22876	4.81372	5.05405	4.96747	5.67245	4.98875	4.45825	4.80173	5.07084	4.92554	4.49547	5.01024	4.81669	4.78229	5.73668	4.75131	4.62816	4.47336	4.86001	4.59361	4.81276	4.63763	5.08215	4.91954	4.94732	4.69466	4.65566	5.13756	4.69409
Les.3299.2.A1_s_at	Les.3299.2	5.51939e-05	0.00174976	5.65287	6.45487	7.10549	10.6617	9.29651	9.69321	6.89322	7.22782	9.46494	8.99639	7.39422	9.62257	10.7392	10.6236	11.0495	11.4276	11.1761	10.8676	10.5562	10.9168	9.67052	10.5904	9.41753	7.90185	8.26609	8.68585	10.1283	7.39947	7.60804	8.97451	9.27257	10.3443	8.59226	9.14158	8.17415	7.82564	8.80439	8.52772	7.22976	10.2125	8.46472	8.39651	7.26576	8.09473	9.13472	7.81519
Les.3311.1.S1_at	Les.3311.1	0.00010252	0.00297117	13.2939	13.4166	13.2919	13.3132	13.2871	13.2912	13.4114	13.4475	13.3523	13.4026	13.3796	13.3836	13.2991	13.217	13.2084	13.3879	13.1583	13.2587	13.4099	13.2823	13.3344	13.2348	13.2119	13.1605	12.7405	12.5064	13.1976	13.1539	13.0623	12.8946	12.8988	12.7796	13.4828	13.2937	13.2036	12.6766	12.7291	13.049	13.5549	13.513	13.2625	13.3763	12.6861	12.8079	13.3992	13.4076
Les.3311.2.S1_at	Les.3311.2	2.48551e-05	0.000906337	12.3608	12.4322	12.4485	12.2165	12.4881	12.3517	12.6191	12.4921	12.5292	12.5383	12.5943	12.6462	12.1755	12.2056	12.2343	12.3278	12.1376	12.163	12.3486	12.2678	12.2018	12.1202	12.3112	11.7561	11.5943	11.2835	12.0768	11.8327	11.6258	11.5144	11.7053	11.7085	12.009	11.9868	11.8573	11.2268	11.474	11.8398	12.4882	12.5068	12.0359	12.095	11.4012	11.5864	12.1622	12.1816
Les.3311.3.S1_at	Les.3311.3	1.96695e-06	0.000100509	11.4615	11.6157	11.5885	11.3093	11.5968	11.61	11.7526	11.7608	11.8045	11.722	11.818	11.8667	11.1412	11.3961	11.3888	11.3134	11.1405	11.3383	11.4519	11.4491	11.2256	11.1638	11.5487	10.7077	10.5708	10.4042	11.0975	10.5638	10.6791	10.4115	10.6457	10.6362	11.1269	10.9137	10.7716	10.1101	10.3213	10.6045	11.5781	11.4468	10.9438	10.9753	10.4042	10.4925	11.1131	11.2435
Les.3319.1.S1_at	Les.3319.1	3.59416e-05	0.00122977	9.53067	9.36011	9.69015	10.1911	8.84467	9.36351	8.93127	8.7938	9.14985	9.11961	8.76568	8.90085	11.4877	10.9657	11.2856	11.3496	9.74036	10.4515	10.8859	11.0379	9.17649	9.8604	10.2001	10.3062	10.4096	8.92779	12.2263	11.874	10.6532	9.78302	10.5001	10.6196	11.2015	10.8011	11.1773	9.89955	9.24493	10.9657	12.2396	12.0699	11.5937	12.0821	10.54	11.0163	11.4714	11.4014
Les.3319.2.S1_at	Les.3319.2	1.46031e-05	0.000578687	6.68841	6.76295	6.75561	7.21735	6.51868	6.49317	6.31939	6.76333	6.52682	6.41964	6.52412	6.38633	8.13831	8.11255	8.17351	7.87432	6.13429	7.5779	7.65965	7.82006	6.03689	6.91645	7.44136	7.00069	7.58538	6.51375	8.87559	7.88375	7.64721	6.37099	7.61007	7.7604	7.7599	7.50058	8.02389	7.04237	6.39112	7.43273	9.05982	8.7505	8.17318	8.67631	7.29121	7.59058	8.17106	8.0835
Les.3319.3.S1_at	Les.3319.3	9.71556e-06	0.000421568	7.71005	7.7562	8.05604	8.44013	7.20642	7.63221	7.2414	7.03016	7.28076	7.46932	7.11027	7.16109	9.85128	9.48175	9.80588	9.68584	7.92441	8.88576	9.24944	9.3324	7.37887	8.01433	8.65675	8.61271	8.84637	7.42236	10.6409	10.0526	8.94687	7.93052	8.91311	9.12561	9.49056	9.2492	9.60009	8.11406	7.61373	9.22888	10.7889	10.4666	10.0247	10.5766	8.85049	9.29951	9.84213	9.90609
Les.3338.1.S1_a_at	Les.3338.1	8.16584e-06	0.000360364	12.3924	12.0287	11.9232	12.1237	12.1516	12.0747	12.1282	11.9484	12.0615	11.9159	12.2063	11.8918	11.7756	11.5088	11.6678	12.2374	11.2725	11.5962	11.8392	11.6064	11.4121	11.6204	11.3132	11.3572	10.8588	10.8104	11.9623	11.6974	11.6012	11.0932	11.3592	11.194	11.9994	11.771	11.6553	11.134	10.9899	11.3066	12.0461	12.0799	11.8247	11.9288	11.2615	11.0803	11.9768	11.9162
Les.3338.1.S1_at	Les.3338.1	5.91278e-05	0.0018518	12.0742	11.9478	11.8823	11.9504	12.0209	12.0069	12.0166	11.8438	11.9367	11.8935	12.0256	11.8309	11.5124	11.4354	11.6588	12.0687	11.2522	11.2821	11.7142	11.4129	11.2657	11.4735	11.3064	11.1229	11.1329	10.6275	11.7936	11.4815	11.3145	10.7982	11.3627	11.3495	11.7168	11.3451	11.4046	10.8599	10.8263	11.128	11.9292	11.9085	11.5225	11.661	11.1994	10.9279	11.7752	11.731
Les.3346.1.S1_at	Les.3346.1	0.00201368	0.0376874	11.5499	11.6011	11.6473	11.0459	11.2826	11.2359	11.1176	11.1712	11.1699	11.5174	11.1954	11.3343	11.4455	11.3767	11.3576	11.54	11.4391	11.1776	11.6129	11.2356	11.8051	11.4387	11.8605	12.0702	11.8115	11.7872	12.6468	12.4183	12.2871	11.9298	12.3433	11.7164	12.142	11.8215	12.3712	11.7889	12.4138	12.122	12.5313	12.2806	12.0633	12.6279	12.4506	12.4296	12.1591	12.0875
Les.335.1.S1_at	Les.335.1	0.00278139	0.0486556	12.2695	12.0593	11.4386	12.1729	11.7313	11.9827	11.4186	10.8994	11.1826	11.5052	11.813	11.6008	11.548	11.7169	11.5254	11.9831	11.7021	11.8534	11.611	11.7773	11.2934	12.0987	11.3472	11.5724	11.6259	11.1146	11.3567	11.3014	10.9129	11.7142	10.4018	11.2778	11.7063	11.8241	11.2616	11.086	10.5819	11.273	11.7185	11.9416	11.9396	11.1058	9.67418	10.4646	11.5457	11.6875
Les.3358.1.S1_a_at	Les.3358.1	0	0	11.7763	11.7219	11.2901	11.6642	11.4337	11.6598	11.1834	11.132	11.6516	11.0103	11.4845	11.2574	10.2312	10.4656	10.4838	11.2072	10.9788	11.5638	10.5986	10.6021	10.6748	10.7536	10.9091	10.8877	10.8833	10.9976	11.5119	11.4648	11.3352	10.9785	11.5669	11.2816	11.393	11.2414	11.6323	11.2309	11.3334	11.2135	12.4439	12.6747	12.142	11.6483	11.3156	11.3026	12.0203	11.936
Les.3358.1.S1_at	Les.3358.1	0	0	10.8422	10.8243	10.2976	10.6722	10.5628	10.661	10.2491	10.1532	10.6957	10.0927	10.6439	10.3269	9.21017	9.57764	9.64538	10.2259	9.89563	10.5354	9.69015	9.60551	9.79184	9.75307	9.88041	9.80933	9.82652	9.98503	10.5297	10.1322	10.5789	9.88084	10.5766	10.2808	10.121	10.0949	10.5593	10.3554	10.3034	10.1772	11.5053	11.7216	11.1865	10.667	10.4143	10.3662	11.0423	10.9175
Les.3358.2.S1_at	Les.3358.2	0	0	12.4578	12.3462	12.0997	12.2765	12.2454	12.2999	11.7943	11.7285	12.3804	11.7794	12.2032	11.9926	11.315	11.2458	11.3134	12.2438	11.9635	12.2086	11.611	11.4966	11.7732	11.8666	11.4791	11.8023	11.5509	11.5837	12.3684	12.2936	12.2375	11.9156	12.1303	11.8366	12.0506	12.0321	12.1791	11.8284	11.9579	11.8683	12.9536	13.2559	12.7424	12.2105	11.9122	11.9824	12.5823	12.5711
Les.3383.1.S1_at	Les.3383.1	1.29938e-05	0.000542596	8.53867	8.94762	8.73861	8.54934	8.71795	8.73109	8.48256	8.36934	8.90519	8.03381	9.26191	8.79669	9.09978	8.81771	8.8046	9.08212	9.04496	10.0955	8.99135	9.02247	8.28128	9.47796	8.56341	8.33378	8.81209	9.22669	9.45119	9.23	8.77896	8.85507	8.9171	8.56195	9.07934	8.90294	9.39905	8.66568	8.26311	9.35434	10.1069	10.3843	10.1653	9.46095	8.35722	9.08979	9.58624	9.72676
Les.34.1.S1_at	Les.34.1	0.000814378	0.0177676	9.2302	8.99488	9.22122	9.04139	9.2104	9.0229	9.17737	9.25444	9.19917	9.09366	9.09973	8.65782	7.876	7.70212	7.9738	8.10379	8.41676	8.06151	8.00168	8.21682	8.71178	7.93537	8.39754	8.23418	8.16032	8.08126	8.36646	8.77376	8.88958	8.25224	8.73755	8.18652	8.20495	7.89621	8.68678	8.48066	9.06154	8.31905	8.26532	7.93649	7.93314	8.62478	9.23027	8.40321	8.38636	7.95891
Les.3418.1.S1_at	Les.3418.1	2.0206e-05	0.000769313	11.8781	11.7632	11.3977	11.7047	11.6705	11.9488	11.6323	11.148	11.5233	11.6135	11.8283	11.9821	12.3123	12.4856	12.2215	12.4803	12.2308	12.4345	12.359	12.3057	12.008	12.2352	12.1875	12.3104	12.3112	12.2458	12.6001	12.5578	12.2306	12.3528	12.4079	12.1235	12.5478	12.4199	12.4499	12.075	12.0382	12.4096	13.014	12.9763	12.7901	12.6129	11.827	11.9738	12.5884	12.7633
Les.3418.2.S1_a_at	Les.3418.2	1.06692e-05	0.00045283	10.376	10.358	9.99137	10.2396	10.1824	10.5501	10.3691	9.74527	10.0895	10.2422	10.3527	10.6874	10.8577	11.1174	10.7824	11.0804	10.7182	11.2287	10.9723	10.899	10.5749	10.765	10.9405	10.7697	10.8144	10.723	11.167	10.7687	10.7522	10.7915	10.8479	10.6478	11.0612	10.9962	11.0598	10.4238	10.3472	10.9052	11.6319	11.4221	11.4536	11.2298	10.3644	10.3957	11.1994	11.3713
Les.3460.1.S1_at	Les.3460.1	9.89437e-06	0.000426942	8.56654	8.71815	7.72038	8.85497	8.80495	8.99817	8.65895	8.23482	8.86528	9.07321	9.31221	9.63874	9.92827	10.2594	9.66196	9.87981	9.99189	10.4417	9.76153	10.0728	8.92208	10.0372	9.43726	9.65783	9.74078	9.16779	9.92329	9.82887	9.32182	9.58213	9.30411	9.82827	10.2658	10.1206	9.94164	9.72554	8.93924	10.0128	10.9116	11.074	10.961	9.99211	8.37728	8.82801	10.4817	10.9286
Les.3467.1.S1_at	Les.3467.1	0.00012368	0.00351875	10.7639	10.7297	10.7789	10.8863	10.8494	10.8153	10.9599	10.9913	10.9305	10.9397	11.0147	10.9772	11.023	10.9866	11.0907	11.2806	10.9535	10.9212	11.1243	10.9399	10.8744	11.1157	11.0349	11.2536	11.0923	10.9904	11.5896	11.3408	11.2176	11.1714	11.1569	11.2161	11.491	11.2566	11.2308	10.9778	11.1902	11.2036	11.7318	11.8378	11.4823	11.364	11.1393	11.103	11.4565	11.5497
Les.3493.1.S1_at	Les.3493.1	3.57628e-07	2.15325e-05	8.73511	8.64595	8.39583	8.95983	8.72595	8.99577	8.45895	8.16333	8.44286	8.77276	9.16388	9.0373	9.9159	10.1936	9.72911	10.3028	10.3107	10.4766	9.74578	9.67939	9.36592	10.5532	9.66756	9.70596	9.90296	9.04929	10.2798	10.0542	9.34067	9.70833	9.11169	9.63626	10.2662	10.3317	9.74964	9.3541	8.72943	9.67199	10.6342	10.8145	10.5412	9.76442	8.10972	8.89213	10.191	10.3606
Les.3502.1.S1_at	Les.3502.1	0	0	6.10307	5.05935	4.66599	4.72403	4.79612	5.07274	4.4081	4.59972	4.709	4.88335	5.66934	5.33719	5.45997	5.48926	5.021	6.53758	5.8872	5.59012	5.99456	5.06766	5.4386	6.15574	5.64285	4.95347	5.00028	4.4066	5.97577	5.52231	5.15974	4.74073	4.97157	4.28076	6.36898	6.04539	5.32606	4.67365	4.46591	4.73892	6.43739	6.6717	6.07573	5.22183	4.48823	4.08413	5.90757	6.44624
Les.3526.1.S1_a_at	Les.3526.1	0.00223637	0.0408703	7.53537	6.9714	6.95443	7.48156	7.12364	7.27704	7.16909	6.70773	7.32111	7.02103	7.31335	7.19635	6.95336	7.29524	7.18035	7.55646	6.97046	6.98041	7.13509	6.86756	6.55717	6.82569	6.695	7.16716	7.23724	6.58929	7.46414	7.43629	7.00716	7.2103	7.14223	6.83733	7.30955	6.93623	7.36744	6.50577	6.80434	6.92819	7.91444	7.64737	7.42913	7.44936	6.65329	7.01699	7.05105	7.28554
Les.3537.1.S1_at	Les.3537.1	0.000325322	0.00802151	11.9395	12.1772	12.238	12.4149	12.8712	12.5046	12.9835	12.7022	12.5853	12.8995	12.9374	12.6301	12.2979	12.3515	12.2763	12.438	11.7454	12.2409	12.1747	12.0234	10.5079	11.9043	10.7255	11.6406	11.9334	11.6304	11.0017	10.9575	11.125	11.5929	11.3067	11.452	11.6009	11.6403	11.1617	11.507	11.3742	11.5456	11.258	11.5938	11.8779	11.5098	11.1106	11.6776	11.3706	11.748
Les.3539.1.S1_at	Les.3539.1	0.000802755	0.017613	7.17459	6.35729	8.10065	8.42769	7.04999	7.74083	7.77379	6.89044	6.91288	8.36765	7.58915	7.70455	5.92848	6.26582	5.93142	6.4821	5.7969	5.62532	6.22781	5.84632	6.67198	5.90295	6.14598	6.82865	6.95739	5.63115	8.63763	8.40036	8.2371	6.93488	8.40575	6.90115	7.71075	7.36265	8.16765	6.48276	7.36147	7.2179	8.80662	7.41848	7.38484	7.9643	8.30731	8.39791	7.25786	7.29423
Les.3550.1.S1_at	Les.3550.1	0	0	6.41936	6.35072	6.32525	6.26235	6.00472	5.95142	6.03583	5.81885	5.87722	5.98234	5.78895	5.74844	5.92622	5.49227	5.54929	6.22533	5.80531	5.73882	6.21249	5.02654	5.85792	5.8319	6.09209	5.53695	5.40041	5.36333	8.40991	8.06611	7.89295	5.84493	7.64461	4.96079	7.00462	6.32611	6.79955	6.28542	7.59497	5.67031	8.0527	6.49813	6.56718	6.78557	7.24062	7.89505	6.17427	6.73056
Les.3551.1.S1_at	Les.3551.1	0.00266618	0.0471713	7.31415	6.97004	7.4941	7.28496	6.89435	7.27783	7.59095	6.10018	6.8308	6.52326	6.51988	7.06204	8.46556	8.50128	8.13032	8.61857	9.6648	9.00197	9.03561	8.31085	9.80532	9.44328	9.49821	10.1618	10.4725	10.8311	9.95339	10.344	10.9714	10.5557	11.0588	9.91145	9.66251	9.50722	10.1597	10.8865	11.1039	9.50542	9.19729	9.34659	8.7361	9.06239	10.5929	9.56259	9.35359	8.79795
Les.3569.1.S1_at	Les.3569.1	8.34465e-07	4.6628e-05	9.85447	9.97089	9.83577	9.56859	9.67406	9.64991	9.58172	9.61734	9.61342	9.57998	9.50093	9.66373	10.0335	9.97186	9.97293	9.87123	10.0625	9.97895	10.0466	10.068	10.3289	9.8693	10.3371	10.4801	10.532	10.7113	10.1574	10.3529	10.3501	10.544	10.562	10.3676	10.3262	10.3777	10.5319	10.5864	10.5993	10.3518	9.68016	9.96244	10.1684	9.9486	10.4725	10.3394	10.1784	10.0805
Les.3575.1.S1_at	Les.3575.1	0	0	6.83175	7.42564	6.03829	6.93061	7.28658	7.107	6.30925	5.68155	6.06817	6.49809	6.75383	6.81689	5.50491	5.73668	5.22985	6.72413	7.43496	7.38658	5.90099	5.43994	7.69502	7.80758	7.50686	5.96832	6.25011	6.69279	8.64666	7.71952	7.61258	7.09854	7.24356	6.03712	7.69198	7.3762	8.04276	6.58013	6.42005	6.38382	8.54163	8.25435	8.10712	8.05761	6.53508	6.8958	7.79023	7.9071
Les.3578.1.S1_at	Les.3578.1	4.35114e-06	0.000202367	4.84706	4.80192	4.90177	4.95647	4.98116	4.70703	5.00217	4.98169	4.8904	5.16228	5.01952	4.83443	5.03487	4.4998	4.84742	5.59829	5.16118	5.16422	5.47398	4.44488	5.28102	5.71433	5.27734	5.03943	4.69294	4.84225	5.93159	6.69541	5.92028	5.04725	5.86949	4.9492	5.84816	5.46889	5.68184	4.75649	5.55308	5.04673	5.78364	5.13291	4.85232	5.60627	4.86163	4.98605	5.11336	5.12768
Les.3581.1.S1_at	Les.3581.1	1.19209e-07	7.65205e-06	4.48325	4.53572	4.75682	5.15553	4.64659	4.62102	4.6246	4.60475	4.51795	4.69888	4.47027	4.7726	4.552	4.65642	4.55511	4.54239	4.52162	4.64984	4.74147	4.46903	4.60262	4.40553	4.69515	4.68452	4.74906	4.78098	5.7561	6.56197	5.78035	4.68933	5.55428	4.66966	5.06513	4.89133	5.05034	5.01794	5.20788	5.18541	7.00489	6.00207	5.55368	5.5929	4.74337	5.1625	5.9228	5.16168
Les.3583.1.A1_at	Les.3583.1	6.13928e-06	0.000275629	5.06282	5.07333	4.66629	6.1853	4.4196	4.53786	5.2257	4.45701	4.65765	5.03159	5.15842	5.45956	6.5413	5.96596	5.7124	7.667	5.64228	7.32479	7.42004	6.63518	5.25574	6.40087	6.98045	9.27091	6.21054	5.54136	8.60523	9.39955	8.21944	5.89786	5.72238	7.12362	9.05717	9.12761	7.48845	5.62008	5.9653	8.60619	11.1652	11.7307	10.3692	9.50714	5.79527	6.53513	10.3667	10.2413
Les.36.1.S1_at	Les.36.1	0.00016284	0.00440689	6.39707	6.86202	6.56855	6.06485	5.78694	6.32248	5.13578	5.52088	6.63947	5.29052	5.06892	5.80756	9.65869	9.62599	9.84108	9.69387	9.56606	9.88098	9.30282	9.83434	10.2602	9.70907	9.59294	9.92238	10.205	10.0261	10.2074	10.24	10.2479	10.1428	10.2238	10.1011	10.1825	10.0786	10.3121	10.1899	10.0638	10.1009	10.509	10.6107	10.4483	9.96568	10.0341	9.98502	10.1934	10.2698
Les.3640.1.S1_at	Les.3640.1	0.000462413	0.0109166	9.45855	9.29113	9.44479	9.77574	9.44393	9.41953	9.48217	9.14863	9.36259	9.47779	9.51232	9.4338	7.08753	6.86011	6.86482	7.21407	6.76503	7.6686	7.25612	6.83069	5.72531	7.53848	6.00104	7.02993	5.85001	5.1906	6.55971	6.57298	5.92028	5.71758	4.87349	6.04752	7.15945	7.2624	5.84051	6.24395	5.08815	6.8126	7.84112	8.2108	7.67467	6.60599	4.98531	5.59364	7.52886	7.80462
Les.3645.1.S1_at	Les.3645.1	1.19209e-06	6.38551e-05	7.98052	8.14277	7.93208	6.49433	6.92409	5.74906	6.49656	6.30343	5.90434	6.7453	6.39854	6.13215	7.37998	6.77342	6.86206	7.34002	6.15156	7.37153	6.87455	7.05022	5.61779	6.32732	5.90571	6.60294	6.67438	6.52692	7.21456	7.03441	6.87632	6.6442	6.83922	6.35144	6.92501	6.5997	6.80722	6.60537	6.87496	6.32054	7.06874	7.20654	6.79866	6.89492	6.47678	6.88282	6.34399	6.08786
Les.3657.1.S1_at	Les.3657.1	1.00136e-05	0.000429699	8.73824	8.84256	9.01924	8.6528	8.56144	8.38345	8.61612	8.44251	8.45944	8.5853	8.41576	8.27459	9.25282	9.44811	9.05606	9.77508	9.03207	9.5168	9.28123	9.14751	9.3847	9.56447	9.39968	8.9955	9.22629	9.22986	10.5184	10.1571	9.74392	9.6353	10.2307	8.77307	9.37203	9.35666	10.0399	9.29746	9.59346	9.20247	10.1176	9.89479	9.49725	9.49701	9.24458	9.29414	9.39987	9.79113
Les.3662.1.S1_at	Les.3662.1	0	0	5.21475	5.35644	5.02279	5.32067	5.08523	5.11184	5.32713	5.07881	5.19027	5.18044	4.89344	5.19829	4.60109	4.75002	4.92597	4.9539	4.60228	4.83915	4.92149	4.66312	5.13154	5.12193	4.92418	4.69663	4.69649	4.42234	5.48581	4.81905	5.47305	4.80486	4.78646	4.61898	5.3888	5.36367	6.05818	5.00105	4.98078	4.75824	7.55085	7.34016	6.33211	5.07403	4.86127	5.12759	6.15844	6.59946
Les.3672.1.S1_at	Les.3672.1	2.32458e-06	0.000115	9.73519	9.83349	10.0491	9.79912	10.0876	9.89856	9.93255	10.1114	10.3097	9.84322	10.1655	10.0128	10.6666	10.6652	10.6936	11.0926	10.6035	10.7577	10.9195	10.758	10.274	10.8907	10.3146	11.2006	11.1583	10.2857	11.8767	11.5159	11.0744	10.8334	10.8371	11.3472	11.7959	11.6395	11.4181	10.5878	10.572	11.2879	12.2812	12.3603	11.7633	11.4621	10.7772	10.7324	12.0002	11.8827
Les.3675.1.S1_at	Les.3675.1	0.000540197	0.0123767	10.3649	10.4164	10.4161	10.4443	10.3469	10.5718	10.4639	10.2813	10.4324	10.4282	10.4618	10.5168	10.7836	10.8711	10.8861	10.9434	10.5499	10.6656	10.8644	10.7702	10.812	10.6065	10.8142	10.275	10.2197	10.0588	10.8086	10.6268	10.26	10.2778	10.6246	10.3605	10.6544	10.3887	10.5911	10.014	10.2525	10.3303	10.9554	10.8988	10.5079	10.7531	10.3966	10.3991	10.5556	10.5833
Les.3681.1.S1_at	Les.3681.1	0.00110596	0.022968	9.80178	9.81958	9.82764	9.74029	10.1792	10.0003	10.1319	10.2027	10.0098	10.1856	10.1771	10.0483	9.548	9.68052	9.43057	9.48994	9.91498	9.68013	9.44114	9.56004	9.65764	9.91297	9.84502	9.86098	10.2015	10.2945	9.25096	9.59568	9.76747	10.1946	9.91231	9.99676	9.71241	10.0102	9.58808	10.1437	10.0334	10.0114	9.07319	9.40126	9.8886	9.15881	9.83374	9.88255	9.57739	9.79902
Les.3686.1.S1_at	Les.3686.1	0	0	8.66854	8.96762	8.09308	8.57166	8.60203	8.74823	8.79332	7.94329	8.00547	8.62536	8.63707	8.65992	7.60154	7.49556	7.16148	7.76811	7.72089	8.03735	7.45011	6.93167	6.67459	7.66574	7.01837	6.63056	6.91278	6.84772	6.72076	6.78193	6.85744	6.46597	6.57096	6.4518	7.34279	7.33236	6.91557	6.99131	6.85549	6.76126	7.98423	7.94556	7.95027	7.24021	6.52233	6.77288	7.65449	8.02036
Les.3687.1.S1_at	Les.3687.1	2.38419e-07	1.50553e-05	12.3229	12.3786	12.1659	12.2615	12.1591	12.3458	12.2354	12.0939	12.1592	12.0082	12.2143	12.2532	11.6497	11.6557	11.4781	11.4815	11.7436	12.0019	11.4341	11.401	11.1034	11.7602	11.2965	10.6706	10.7957	10.4314	10.6185	10.5276	10.5457	10.5247	10.0519	10.6588	11.3341	11.379	10.7334	10.5984	9.94003	10.5599	11.1671	11.4136	11.485	10.5343	10.1312	10.538	11.0996	11.6033
Les.37.1.S1_at	Les.37.1	0.000274539	0.00696845	6.26316	6.59164	5.51722	6.41517	6.08592	6.06781	6.3456	5.55288	5.67134	6.32306	6.37797	6.02646	7.12893	6.73084	6.35656	6.93635	6.81908	6.49894	7.41888	6.91501	6.67036	6.84973	6.66857	6.92954	6.34911	6.50787	8.07587	7.56171	7.01881	6.80301	6.82996	6.82124	7.59163	6.54794	7.59652	6.45383	5.82067	6.91618	9.12205	8.20237	7.12086	7.88641	6.95292	7.14836	7.51482	7.58606
Les.3710.1.S1_at	Les.3710.1	0	0	8.42019	7.98286	7.41038	8.10681	8.10426	8.25283	7.73577	7.27427	7.48294	8.45477	8.34717	8.14794	8.03788	8.05362	7.77691	8.85873	8.62135	8.96813	7.95796	7.57564	8.23907	8.96835	8.17008	7.58115	7.79042	6.99795	8.50619	8.16853	7.60651	7.6093	7.68484	7.55937	8.61474	8.49809	8.07444	7.33479	7.18312	7.88163	9.0017	9.13413	8.76385	8.01006	6.92514	7.48018	8.69419	8.72351
Les.3712.1.S1_at	Les.3712.1	0	0	6.41836	6.26023	6.61486	5.99267	5.97105	5.91187	5.78469	5.98004	6.45531	5.79847	5.46286	5.78091	6.84901	6.63802	6.54334	7.1192	6.64839	6.91695	6.85879	6.41027	7.00643	6.88458	6.78135	6.41794	6.66794	6.32467	8.2728	8.08811	7.78272	6.80091	7.53449	6.89291	7.95779	7.57264	7.80399	6.66845	7.05579	7.07024	9.301	9.05018	8.39383	7.42075	7.01315	6.75213	8.52901	8.36562
Les.3735.1.S1_at	Les.3735.1	0.00113338	0.0233501	5.38771	5.25264	5.319	5.44829	5.54339	5.43355	5.55522	5.27987	5.40832	5.38463	5.75938	5.71714	7.65137	7.57197	7.20625	7.92296	6.46871	7.01711	7.88626	6.87705	5.33769	7.31359	6.73399	7.40485	7.19647	6.0794	7.96981	7.52187	6.72626	7.22028	7.09263	7.02868	8.22853	7.92061	7.17323	6.36594	7.06319	7.51171	8.65197	8.95191	8.29121	8.11379	6.871	7.42306	8.25283	8.39955
Les.3769.1.S1_at	Les.3769.1	3.57628e-07	2.17007e-05	11.9017	11.892	10.964	10.6604	10.8136	10.752	10.5009	9.77838	10.1543	10.479	10.4146	10.1498	9.11261	9.09924	8.95847	9.35954	9.43927	9.44186	9.23117	8.98387	9.57909	9.52852	9.24559	8.98373	9.26318	9.01461	9.4259	9.56788	8.97812	9.19439	9.20657	8.83813	9.41107	9.45304	9.63729	8.85638	8.56791	9.08638	9.57145	10.1254	9.64156	9.53554	8.24046	8.28495	9.51629	9.3644
Les.3774.1.S1_at	Les.3774.1	0	0	9.17642	8.62457	9.1102	9.79295	9.18955	9.56149	9.6063	9.01406	9.86554	10.0315	10.2482	10.5155	9.37587	9.21847	9.06278	10.7366	10.0936	10.222	9.65617	9.20676	10.0372	10.567	10.1025	9.15222	8.74189	8.26001	10.6568	10.201	10.0472	8.72279	9.18365	8.56595	10.4576	10.258	10.4589	8.27924	8.29841	9.65451	11.8684	11.5951	11.145	10.2122	8.23222	8.85591	11.099	11.3067
Les.3775.1.S1_at	Les.3775.1	0.000531971	0.0122243	14.311	14.427	14.3708	14.3493	14.3585	14.3701	14.3627	14.4284	14.2953	14.3627	14.4023	14.3958	14.1301	14.0493	14.094	14.0271	14.251	14.1678	14.0882	14.0473	14.2204	14.152	14.2314	12.9293	12.3688	12.9631	12.5901	12.8565	13.0961	12.5887	13.0425	12.6846	12.8744	12.615	12.2506	12.4245	12.6835	12.1134	11.873	11.5174	11.1207	11.7997	13.0713	12.7363	12.5489	12.2508
Les.3828.1.S1_at	Les.3828.1	7.55787e-05	0.00228412	5.9425	5.90193	5.56086	6.08126	6.08734	5.94838	6.21547	5.90612	5.74174	6.28878	6.19742	6.26025	5.62316	5.76875	5.72553	5.19675	5.33575	5.36096	5.53484	5.45597	5.23477	5.80028	4.93449	5.51429	5.63837	5.39437	5.62062	5.27029	5.18875	5.16037	4.97674	5.23512	5.70984	5.3568	5.38101	5.46525	5.22037	5.47775	6.14906	5.88583	5.7329	5.48098	5.36065	5.57936	5.74964	5.95712
Les.3869.1.S1_at	Les.3869.1	0.000136971	0.00381311	8.23073	7.43926	7.35414	6.95273	7.32522	7.09086	6.76785	6.90798	6.92986	6.99322	7.02311	7.08058	6.731	6.86113	6.68863	7.05828	7.18915	6.9034	6.92297	6.62364	7.1558	6.94363	6.96925	6.43773	6.79074	6.65213	6.83858	7.37382	6.90952	6.76416	6.86664	6.61611	6.80944	6.85879	6.9784	6.615	6.37708	6.57886	7.33339	7.28775	6.97596	6.69892	6.16082	6.17072	7.04701	7.07406
Les.3963.1.S1_at	Les.3963.1	8.34465e-07	4.62949e-05	8.00965	7.99896	8.62515	9.51721	9.35024	9.0573	8.56994	8.0632	8.85176	8.15471	7.95983	8.11632	8.38444	8.26908	8.17508	8.59809	8.76647	8.54252	8.05909	8.45646	8.79151	8.75389	8.38101	8.02581	8.08654	8.17096	8.08565	7.78949	7.63713	8.29955	7.70565	8.2124	8.11999	8.23985	7.67483	7.94141	7.63211	8.21721	7.57596	8.12614	8.182	7.65774	7.52799	7.80076	7.79806	7.84196
Les.3969.1.S1_at	Les.3969.1	1.72853e-06	8.95035e-05	12.1198	11.7708	11.5028	11.0232	10.9061	11.226	10.6476	10.1363	10.6311	10.839	11.0236	11.1204	10.0668	10.2542	10.1341	10.3843	10.434	10.2707	10.3177	10.154	10.496	10.3624	10.343	10.1484	10.2843	10.2459	10.3335	10.6192	10.311	10.4451	10.3241	10.0028	10.0947	10.1651	10.4785	10.2066	10.3662	10.0321	10.6056	10.5042	10.3382	10.3655	10.1251	10.1521	10.1837	10.3777
Les.4026.1.S1_at	Les.4026.1	0	0	7.33259	7.04895	6.31939	6.91365	6.54641	7.1544	7.01245	7.07657	7.05201	6.65422	6.89192	7.18783	6.18077	6.09907	6.28907	6.65923	7.47877	7.24374	6.60217	6.21785	7.25556	7.63401	7.37823	5.84995	6.0701	5.628	8.4131	7.98677	7.60524	6.205	7.32917	6.30745	8.61529	8.96149	7.56691	6.07402	7.02538	6.86927	10.1736	10.7593	9.43341	7.06925	6.90328	6.44738	9.42765	9.82005
Les.4038.1.S1_at	Les.4038.1	0	0	11.4733	11.3611	10.4369	10.3366	10.8044	10.7392	10.1824	9.41324	9.91172	10.0925	10.465	10.255	8.78899	8.74218	8.32024	9.3827	9.21496	9.34555	8.74605	9.02303	8.46585	9.38485	8.79659	7.9371	7.90883	7.04604	8.23795	7.90713	7.49534	7.3128	6.74414	7.18641	8.56791	8.7832	9.10362	7.0626	6.56248	7.24631	9.0125	9.15465	8.98569	8.03271	6.03183	6.62687	8.95569	9.12741
Les.4150.1.S1_at	Les.4150.1	0	0	4.47446	4.89067	5.50844	4.96589	4.96342	4.73711	5.30805	5.14765	5.18168	5.14823	5.38512	5.24487	5.52261	4.76097	4.90173	6.47632	5.78294	6.21469	6.33858	4.6974	6.50508	6.25591	6.06072	6.10316	5.47185	5.74667	7.80971	8.33051	8.07455	6.63435	8.38472	5.72261	7.27079	6.80689	7.82862	5.9264	7.06995	6.34548	8.4596	8.2125	6.56353	7.11975	6.18348	5.40637	7.51788	7.00417
Les.4222.1.S1_at	Les.4222.1	0	0	7.46461	7.29499	7.46756	7.96718	6.91533	7.21529	7.37336	7.53737	6.79211	7.66317	7.16148	7.31382	8.46081	8.25499	8.11339	9.48768	8.53296	8.53802	8.86423	7.99411	9.26471	9.35905	9.04939	7.90418	8.21568	8.10772	9.81607	9.57162	9.33163	8.40764	9.48514	8.06047	8.60769	8.77242	9.35721	8.46743	8.50763	8.0981	10.4767	9.89095	8.9734	9.15737	8.5924	8.66515	9.11234	9.22747
Les.4259.1.S1_at	Les.4259.1	0.000495851	0.0115654	14.2324	14.139	14.1465	14.1784	14.0965	14.0503	14.1926	14.0897	14.0599	14.1092	14.0941	14.0715	13.9085	13.8786	13.8244	13.7394	13.9603	13.8364	13.8497	13.8372	14.0919	13.9938	14.027	12.7919	12.5836	12.911	12.1666	12.5222	12.9176	12.5059	12.5871	12.4939	12.4945	12.6564	12.5214	12.898	12.9729	12.6096	12.3805	11.9715	11.8981	12.2947	13.1125	12.9776	12.8861	12.5891
Les.4268.1.S1_at	Les.4268.1	0.00217736	0.0401699	8.90291	9.01527	8.68231	8.86381	8.82299	8.97063	8.68701	8.73755	8.81728	8.71541	8.70471	8.92345	10.075	10.1238	9.84069	10.0947	9.68445	10.0824	10.1059	10.0182	9.55869	9.61262	9.62263	10.046	10.0172	9.50456	10.2936	10.0655	9.65979	9.9516	9.84058	10.0521	10.337	10.3083	9.85925	9.74458	9.50329	10.1703	10.7033	10.7372	10.5273	10.4187	9.45676	9.5262	10.4635	10.4201
Les.429.1.S1_at	Les.429.1	0.00237405	0.0427825	11.1875	11.5111	9.63495	9.91137	11.191	10.0502	10.6196	9.72847	9.57813	9.1115	9.90819	8.75514	7.92379	7.61732	7.27873	8.33134	7.72616	7.8045	7.29688	6.19686	6.0778	7.86986	5.93969	6.24703	5.73558	4.81233	6.2877	5.84825	5.48613	4.9533	4.54988	4.88945	6.50444	6.4226	5.84606	4.91095	4.93156	4.83247	7.24418	7.29521	6.05707	5.14726	4.70441	5.04048	6.44812	6.89669
Les.4326.1.S1_at	Les.4326.1	4.22001e-05	0.00140673	6.90131	6.74686	6.66915	6.85461	6.70021	6.57267	6.80408	6.56724	6.53599	6.35366	6.53931	6.67045	6.6835	6.67016	6.82936	7.2476	6.63737	6.57291	7.07468	6.78547	6.41184	5.9019	6.52714	6.55567	6.70795	6.48546	6.89093	6.91716	6.52083	6.71197	6.62299	6.51286	6.79549	6.79509	6.466	6.37504	6.3673	6.25032	7.2655	7.41039	6.88784	6.89574	6.51414	6.33773	7.19292	7.06758
Les.441.1.S1_s_at	Les.441.1	0.00060153	0.0136212	6.61098	6.20148	6.10837	6.71964	6.15972	6.01083	5.70209	5.60724	6.74977	6.83479	6.0684	6.2175	6.67157	7.24389	6.79043	7.22842	7.16798	7.99573	7.02532	6.97587	6.61541	6.50171	6.96605	7.36216	7.215	6.48877	7.31722	7.3659	7.18331	6.39073	6.05939	6.89468	7.82504	7.5431	7.28175	6.79242	6.5345	7.64914	8.20006	8.3839	8.11923	7.39002	6.12285	6.25074	7.96318	8.40792
Les.4428.1.S1_a_at	Les.4428.1	3.93391e-06	0.000186309	13.2731	13.3455	13.624	13.094	13.2368	13.3805	13.4628	13.5891	13.6504	13.3783	13.4085	13.4921	13.407	13.2533	13.4901	13.3782	13.5282	13.2949	13.3697	13.6089	13.6519	13.5314	13.6554	12.9059	13.0202	13.2963	12.3488	12.4485	13.1098	13.0033	13.3114	13.2355	13.3295	12.9277	13.3225	13.1906	12.8822	12.861	12.3237	11.9485	11.949	12.3859	13.195	13.2907	13.0132	13.0512
Les.4428.1.S1_at	Les.4428.1	0.000339389	0.00826343	12.9855	13.0463	13.4438	12.8116	12.9081	13.1065	13.2436	13.2423	13.4198	13.0871	13.1646	13.2605	13.0387	12.8613	13.2101	13.0235	13.1533	13.0169	13.0293	13.2322	13.268	13.3631	13.3959	12.5897	12.6332	12.9078	12.073	12.0864	12.8279	12.5869	12.8829	12.8964	12.8865	12.7091	12.9337	12.8769	12.4131	12.5445	12.0418	11.6182	11.6477	12.1327	12.7407	13.0096	12.6721	12.7455
Les.4428.3.S1_at	Les.4428.3	3.57628e-07	2.13669e-05	5.38249	5.39872	5.67518	4.79794	4.91004	5.31319	4.99429	5.52004	5.48005	5.05619	5.12562	4.84195	4.77472	4.81474	5.0905	5.19675	5.10207	5.35143	4.51244	4.62421	5.30885	4.80285	4.96608	4.26367	4.69294	4.44482	5.17281	4.77303	4.4036	5.26606	4.29511	5.12136	4.43542	5.38336	4.19401	4.46559	4.51128	4.44888	5.18835	5.31154	5.64106	4.4218	4.33294	4.3304	4.44197	4.28574
Les.4443.1.A1_s_at	Les.4443.1	2.14577e-06	0.000106834	9.27134	9.36167	9.29363	7.98617	8.1808	7.1906	7.70853	7.69197	7.0453	8.25236	7.69387	7.488	8.85229	8.03101	8.15493	8.82954	7.79281	8.94384	8.40793	8.43216	7.28331	7.90634	7.2384	8.18106	7.91956	8.04187	8.5997	8.67089	8.43761	8.24205	8.29974	7.65367	8.33135	8.05316	8.16909	7.91857	8.40746	7.86656	8.31587	8.51477	8.24442	8.17218	8.05003	8.31294	7.73336	7.79423
Les.4462.1.S1_at	Les.4462.1	0	0	9.77345	9.40074	9.33671	9.80583	9.64811	9.66123	9.77462	9.19111	9.63708	9.36403	9.20556	9.32725	8.68325	8.46062	8.36294	9.1571	8.74339	8.64276	8.4582	8.48508	8.66306	8.54554	8.37212	8.92871	8.38612	8.6571	9.61533	9.37847	9.1693	8.84335	8.913	8.2919	9.07029	8.91061	8.86657	8.61002	8.95121	8.67944	9.81038	9.59839	9.34792	9.06042	9.01276	9.05508	9.04344	9.24665
Les.4482.1.S1_at	Les.4482.1	0	0	9.06976	8.93749	8.79609	9.01588	8.6914	8.78472	8.95194	8.55673	8.6115	8.86069	8.85579	8.99103	9.89575	10.0932	9.75996	9.97783	9.704	10.0853	9.89856	10.0016	9.19599	9.83473	9.58255	10.0352	10.1289	9.89226	10.7075	10.4574	10.1275	10.2409	9.92783	10.0401	10.7416	10.4518	10.3069	9.86914	9.77387	10.103	11.2032	11.0116	10.8285	10.6102	9.8375	10.0023	10.6573	10.7659
Les.4483.1.S1_at	Les.4483.1	0	0	9.35845	9.36754	9.53496	10.6758	11.0358	10.3049	8.91465	8.0695	9.71545	8.95346	9.14043	9.16022	9.73813	9.87197	9.71178	10.7694	10.3886	10.4215	10.2772	9.98348	10.5698	10.7116	10.3487	10.6205	10.9791	11.0384	11.0475	10.9501	11.0444	11.2636	11.0654	10.8222	10.9433	11.0228	11.3279	10.6842	10.2045	10.5399	11.1466	11.4066	10.9887	10.5206	10.1144	9.87356	10.8068	10.8559
Les.4496.1.S1_at	Les.4496.1	0	0	9.80954	9.41691	9.24617	9.85447	9.52083	9.05651	9.44952	8.90678	9.16463	9.86475	9.87237	10.1468	10.4978	10.7213	10.1799	10.9667	10.5712	11.2668	10.7199	10.7071	9.74423	10.7901	10.3406	11.2564	10.1266	9.44995	11.6351	11.623	11.265	9.94373	9.59298	10.2812	11.9998	11.811	11.3544	9.86633	10.381	11.2261	13.0561	13.1597	12.5827	11.5888	10.8097	11.2618	12.6822	12.846
Les.4501.1.S1_at	Les.4501.1	0	0	9.11228	9.10701	9.06476	9.11773	8.82392	8.78982	9.16641	8.55189	8.74337	9.13231	9.51501	9.16534	8.43777	8.82514	7.95567	10.0491	8.67331	8.9775	8.66005	8.19779	8.68243	9.8268	8.57653	8.84742	8.26398	7.68487	10.0785	10.0859	9.35384	8.37529	9.06994	7.79874	9.7323	9.78942	9.52685	7.48716	8.11832	8.84653	11.0352	10.3031	10.3863	9.92013	8.13768	9.07418	10.1749	10.3915
Les.4508.1.S1_s_at	Les.4508.1	0.000378311	0.00912528	14.3226	14.3205	14.234	14.2605	14.2794	14.3083	14.2555	14.2871	14.2615	14.2839	14.3016	14.2737	14.2793	14.1984	14.1951	14.1498	14.3138	14.3111	14.2121	14.2066	14.3251	14.2578	14.2975	13.8378	13.6448	13.8804	13.5346	13.8323	13.8785	13.6992	13.8751	13.712	13.9424	13.795	13.6515	13.6401	13.7769	13.5459	13.2999	13.0726	12.8266	13.327	13.8934	13.8248	13.6974	13.4643
Les.4508.2.S1_s_at	Les.4508.2	7.62939e-06	0.000338614	14.2665	14.2167	14.2071	14.2133	14.248	14.2271	14.1928	14.1765	14.1977	14.1621	14.2112	14.1889	14.2557	14.173	14.1974	14.1633	14.281	14.247	14.1909	14.166	14.2869	14.3327	14.2596	13.7572	13.5941	13.8073	13.5018	13.5962	13.778	13.5871	13.8004	13.6971	13.449	13.7032	13.5582	13.4488	13.6104	13.3212	13.0606	12.8271	12.5357	13.0255	13.5853	13.6038	13.5268	13.244
Les.4519.1.A1_at	Les.4519.1	3.29018e-05	0.00114084	12.6945	12.6019	12.5399	12.9589	12.7685	12.9041	12.6968	12.5007	12.7749	12.5684	12.6413	12.7683	12.4486	12.4706	12.4088	12.5711	12.4586	12.522	12.4034	12.4983	12.587	12.3712	12.4539	12.3349	12.3004	12.3904	12.3443	12.5422	12.3399	12.3956	12.213	12.2917	12.5271	12.476	12.4457	12.4538	12.2857	12.4181	12.7263	12.8452	12.7192	12.6311	12.1856	12.2269	12.6708	12.7136
Les.4519.2.S1_at	Les.4519.2	0.000314891	0.00783898	11.3476	11.3855	11.2867	11.6309	11.5919	11.6584	11.4821	11.2603	11.6772	11.3374	11.5388	11.5486	11.1768	11.6069	11.5083	11.4377	11.326	11.499	11.3111	11.4146	11.3854	11.2072	11.6018	11.2011	11.4824	11.4791	11.4058	10.9553	11.15	11.2328	11.34	11.4071	11.2399	11.1527	11.3328	11.2051	11.092	11.1488	11.6673	11.8484	11.5446	11.3899	10.9801	11.0468	11.3991	11.4347
Les.4527.1.S1_at	Les.4527.1	3.39746e-06	0.000163901	4.81783	4.7584	4.80964	5.08129	4.56946	4.67305	4.95636	4.87572	4.50837	4.92096	4.62423	4.78004	4.76091	5.14534	5.14713	4.96375	4.98064	5.0223	4.88004	5.12021	4.86297	5.33003	5.0764	4.99528	4.9267	4.55966	5.09595	4.91725	4.7634	4.80033	4.70803	4.90063	5.18876	5.32746	5.17403	4.80081	4.76068	4.96799	5.93947	6.04814	5.43331	5.14726	4.69091	4.62825	5.64792	5.36252
Les.4563.1.S1_at	Les.4563.1	0.00220197	0.040432	9.93191	9.8547	10.0287	9.94958	10.3009	9.97137	9.98615	10.3744	10.3269	10.1452	10.3167	10.0218	8.95958	8.73349	9.03095	8.93685	8.9914	8.67979	9.00005	8.82397	8.93135	8.8901	9.02161	8.4784	8.83708	8.43271	8.46301	8.53751	8.49436	8.44805	8.21127	8.82828	8.66564	8.55334	8.24395	8.51109	8.49028	8.49034	7.78664	7.83009	8.11453	8.13753	8.64769	8.35599	8.45818	8.40954
Les.4635.1.S1_at	Les.4635.1	1.2815e-05	0.000538022	10.6701	10.6782	10.742	10.8236	10.5679	10.7017	10.6847	10.3389	10.5363	10.6863	10.7253	10.7947	11.4778	11.661	11.4869	11.7459	11.3847	11.6421	11.5315	11.3229	11.1826	11.6621	11.3144	11.8146	11.8003	11.5545	12.0901	11.8755	11.6692	11.7716	11.6416	11.5918	12.022	11.8828	11.7033	11.6601	11.6994	11.9726	12.5885	12.6831	12.2903	12.0328	11.5086	11.6725	12.1255	12.2624
Les.4651.1.S1_at	Les.4651.1	2.83122e-05	0.00100411	12.085	12.0749	12.01	12.1062	12.2173	12.2257	12.1923	11.9791	12.0133	11.9687	12.0962	12.069	11.9008	12.103	12.0499	12.6055	11.825	12.0957	12.3575	12.1122	11.7304	11.9714	11.9953	11.9857	12.0571	11.8032	12.5679	12.4598	12.1338	12.0044	12.3733	12.0406	12.4577	12.1778	12.5825	11.7833	11.9129	12.1361	12.9065	13.0481	12.4065	12.5208	11.8513	11.7675	12.4909	12.6362
Les.4703.1.S1_at	Les.4703.1	6.10948e-05	0.00189809	12.004	12.0248	11.9684	12.0171	12.1162	12.0399	12.0766	11.9519	12.0329	11.9666	11.9117	11.912	11.0977	11.1508	11.2509	11.4053	11.1251	11.0745	11.103	11.0046	11.2596	11.184	11.2817	10.874	10.7741	11.0868	10.4385	10.5061	10.6407	10.7221	10.9435	10.8064	10.5816	10.6817	10.9442	11.1294	10.8292	10.6653	9.77822	10.2611	10.4765	10.193	10.6202	10.464	10.3751	10.7208
Les.4735.1.S1_at	Les.4735.1	1.19209e-07	7.91366e-06	9.80471	9.70367	9.79265	9.90073	9.73171	9.80664	10.054	9.77021	9.6023	10.0017	9.96015	9.96443	10.0932	10.2163	9.92202	10.3297	10.0792	10.0378	10.1703	10.0363	10.3275	10.4052	10.3381	10.1578	9.93022	9.678	10.1602	10.1289	9.38759	10.0881	9.49081	9.78841	10.3013	10.3546	9.65511	9.51798	9.51444	10.1679	11.0213	10.9917	10.8543	10.0544	9.23019	9.30557	10.5333	10.6419
Les.4766.1.S1_at	Les.4766.1	0	0	5.48595	5.58407	5.58542	6.16304	6.97416	6.2418	6.77085	6.37642	7.27034	7.16758	6.55729	6.11698	7.23916	6.74705	6.59402	7.8726	6.54296	6.79188	6.54388	6.31025	5.35048	6.54923	5.7455	5.96256	5.32871	5.1758	5.91886	5.50694	5.27005	5.22778	5.05517	5.71756	6.62615	6.56414	6.05023	5.39661	4.87842	5.40834	7.25784	7.95131	7.56888	5.65375	5.12413	5.26317	7.42585	7.34652
Les.4819.1.S1_at	Les.4819.1	0	0	11.0664	9.98465	8.86397	9.22653	8.7595	8.98149	9.04536	7.94764	8.31895	8.82903	8.72732	8.46256	8.7518	8.08695	8.27476	10.1845	9.1666	9.58441	9.35224	7.37615	9.66604	9.73466	9.21298	8.25891	8.03075	7.85886	10.8861	10.0497	9.58897	8.63372	10.8194	7.86862	9.43115	9.05964	9.89406	7.97737	8.46203	8.01406	10.3331	9.99302	8.99163	9.18267	8.38659	8.88691	9.16378	9.50626
Les.4822.1.S1_at	Les.4822.1	0.000137627	0.00381768	9.59984	9.74201	9.68997	9.78048	9.98625	9.87812	9.82817	9.92508	10.1384	10.1762	10.2999	10.2527	10.0722	10.2436	10.0925	10.2592	10.1987	10.4736	10.0953	9.88096	9.14265	10.0606	9.53392	9.63516	9.79712	9.31271	9.89232	9.97629	9.21893	9.68096	9.46091	9.77191	9.83267	9.86296	9.60186	9.51745	9.48903	9.89696	10.365	10.4805	10.5168	10.1659	9.10965	9.55147	10.1025	10.287
Les.4828.1.S1_at	Les.4828.1	0.000132084	0.00369027	8.92703	8.9077	8.77283	9.28768	9.20886	9.35923	9.18393	9.04743	9.32669	9.05112	9.1906	9.32483	9.13008	9.10088	9.11161	9.15963	8.85706	9.26063	9.07723	9.19074	8.60343	8.91018	8.89693	9.43036	9.37001	9.15084	9.47818	9.68686	9.18375	9.34771	9.27908	9.43094	9.70039	9.64165	9.39176	9.24072	9.10633	9.55275	9.92998	9.85582	9.79881	9.74241	9.12814	9.12878	9.82596	9.79196
Les.4862.1.S1_at	Les.4862.1	0.000272989	0.00695183	6.76412	6.68423	6.36723	6.53047	6.94286	6.69584	6.36303	6.70851	6.68137	6.85364	6.49318	6.67747	5.84161	6.06573	5.85269	5.86855	6.55254	6.07876	6.03398	5.82008	6.88476	6.17245	6.60394	6.24078	6.2014	6.73482	5.32342	5.94237	5.89364	6.42078	6.13551	5.87094	5.86291	5.71323	6.02479	6.54986	6.45317	6.12153	5.75831	5.39987	5.76805	5.5565	6.09223	6.21603	5.76493	5.97486
Les.4864.1.S1_at	Les.4864.1	3.15905e-05	0.00110524	7.3693	7.46261	7.75637	8.09813	7.76372	7.90472	8.04637	7.84162	8.22682	7.89606	8.20468	8.42363	8.5264	8.68838	8.27339	8.50044	8.37072	8.5082	8.50781	8.51427	8.16601	8.61107	8.1236	8.65691	8.4959	8.37524	8.81955	8.98703	8.79789	8.84953	8.61467	8.42185	8.74516	8.58961	8.84937	8.67138	8.71652	8.6963	9.09938	9.15471	9.06873	8.94663	8.39659	8.35634	8.70103	8.87657
Les.4870.1.S1_at	Les.4870.1	0.000213563	0.00556627	12.1207	11.8159	11.5561	11.6137	11.2098	11.6343	11.2965	10.9527	11.1858	11.0389	11.5257	11.3517	10.5484	10.5962	10.4875	10.9008	10.5321	10.6684	10.6882	10.4595	10.574	10.715	10.6927	10.2764	10.2291	10.0521	10.4682	10.4213	10.0781	10.357	10.1216	9.86921	10.5828	10.5926	10.3266	9.91795	10.0656	10.2168	10.7807	10.8493	10.604	10.438	9.83522	10.0985	10.534	10.6214
Les.4880.1.S1_at	Les.4880.1	0.000138342	0.00382386	8.17732	7.86961	7.7261	8.23129	7.8281	7.6596	8.43553	7.75952	7.99241	8.67883	8.3605	8.38889	8.16396	8.02041	8.20356	8.10241	7.48211	6.885	8.5771	8.93996	8.32417	7.62162	8.84287	8.60732	8.20314	7.83365	10.066	10.1557	9.207	8.14776	9.80689	7.91725	9.37795	8.13576	10.4777	8.05295	8.78255	8.79367	10.4869	9.06473	8.79502	10.419	10.2179	9.49221	8.63181	9.11756
Les.4885.1.S1_at	Les.4885.1	1.13249e-06	6.10836e-05	5.18355	6.64471	6.1617	4.96159	4.49153	4.88926	4.90404	4.23715	7.55942	4.45074	4.07034	5.49629	10.4377	10.5612	10.3395	10.6906	10.1677	10.8411	10.3969	10.1568	10.7349	10.6934	10.4239	10.3454	10.4475	10.1212	10.7755	10.7882	10.3361	10.6453	10.2818	10.3329	10.8084	10.7107	10.6758	10.1956	10.2335	10.5929	11.326	11.661	11.1369	10.6194	9.9566	9.98235	10.7336	10.8647
Les.4912.1.S1_at	Les.4912.1	0	0	8.84179	8.08846	7.87724	8.88094	8.14314	8.60892	7.61213	7.2467	8.19333	7.32007	7.28847	7.54924	7.84175	7.45936	7.42872	8.24656	7.62474	7.95875	7.41402	7.42679	8.02902	7.76291	7.50473	7.12451	7.44375	6.79086	8.98252	8.46575	8.02739	7.23051	7.96982	7.78481	8.33641	8.32992	8.41914	7.15482	7.12924	7.74295	9.25726	9.44832	8.76439	8.53174	7.32815	7.44358	8.81924	8.65323
Les.4924.1.S1_at	Les.4924.1	0	0	7.06575	7.35121	7.60803	8.23723	7.46621	7.90702	7.50173	7.51018	7.97813	8.2027	8.28219	8.21893	7.38362	7.68264	7.51999	7.99962	7.75859	7.54443	8.19824	8.14862	7.42474	8.15485	7.79599	7.58641	7.56967	7.14675	8.04669	8.26155	7.66024	7.8995	7.50084	7.61992	8.32983	8.118	8.21792	6.83066	6.69917	7.93816	9.33976	9.14585	8.71126	8.10945	6.39908	6.66442	8.7062	8.76326
Les.4968.1.S1_s_at	Les.4968.1	0.000866055	0.0186334	10.8581	11.1731	11.2749	11.4546	11.856	11.5203	12.1919	11.7815	11.7547	12.0355	11.9351	11.8167	11.2641	11.4075	11.4469	11.4707	10.8114	11.3444	11.2646	10.9775	9.45079	11.022	9.65379	10.5534	10.9398	10.5992	9.95933	9.77278	10.0714	10.6115	10.2062	10.4168	10.4097	10.6386	9.95134	10.4847	10.2995	10.552	10.0713	10.493	10.8188	10.4388	10.0222	10.6353	10.4063	10.6217
Les.4993.1.S1_at	Les.4993.1	0.000683248	0.0153375	7.54438	7.0426	7.14479	7.48272	6.90522	7.05891	7.17718	6.8438	6.95848	7.30982	7.10501	7.2098	7.81428	7.63634	7.84414	8.12685	7.24156	7.11064	8.02431	7.39397	7.55826	7.16709	7.54999	7.7481	7.83542	7.45273	8.67303	8.66149	8.27358	8.19162	8.572	7.96958	8.20892	7.85949	8.02179	7.64812	8.08653	7.85761	8.95053	8.51549	8.2746	8.72546	8.04643	8.22523	8.17539	8.02309
Les.5.1.S1_a_at	Les.5.1	0.00115126	0.0235312	9.96133	9.87727	10.02	10.4504	9.89188	10.1613	10.093	9.7318	9.8533	10.2543	10.0465	10.207	11.2233	10.8717	11.1796	11.1747	10.8143	10.8773	11.2513	11.3276	10.5505	10.9543	10.9106	10.2034	10.14	10.0502	10.7561	10.5242	10.1026	10.3861	10.8694	10.8002	10.5777	10.3776	10.3863	9.72222	9.53702	10.1336	10.7417	10.706	10.2924	10.5552	9.75651	9.72754	10.3179	10.3711
Les.5005.1.S1_at	Les.5005.1	0.00023824	0.00614754	7.69605	7.71634	7.7172	7.92439	7.95214	7.97473	7.70298	7.77663	8.0087	8.2519	7.95285	8.16712	8.4349	8.33618	8.13424	8.41747	8.43793	8.46265	8.31217	8.33392	8.25625	8.39878	8.44539	8.47039	8.38588	8.39673	8.42115	8.54489	8.11707	8.4121	8.23628	8.23794	8.45727	8.46332	8.38105	8.19664	8.02736	8.41169	8.97157	8.7481	8.58902	8.37167	7.93345	8.00092	8.66338	8.41033
Les.5009.1.S1_at	Les.5009.1	0.00239849	0.0431229	9.06884	9.22211	9.15572	9.10135	9.36009	9.3034	9.26077	9.56014	9.50801	9.15278	9.5305	9.20053	9.1716	9.05108	9.02614	8.96203	9.09457	9.07449	9.05458	9.01324	9.11204	9.07171	8.87739	9.23964	9.36997	9.32209	8.85667	9.23108	9.23621	9.33279	8.89457	9.205	9.33829	9.35096	9.09168	9.61126	9.4414	9.40722	8.86174	8.98649	9.18164	8.85926	9.29428	9.34187	9.23243	9.22869
Les.5013.1.S1_at	Les.5013.1	0.000313222	0.0078225	8.88615	8.77912	8.71025	8.81287	8.62265	8.69338	8.96023	8.43548	8.58564	8.67111	8.46381	8.70556	9.37454	9.37279	9.25838	9.37239	9.12709	9.15937	9.33825	9.33258	9.29591	9.04807	9.40656	9.19593	9.4089	9.37601	9.62488	9.60247	9.32577	9.3873	9.53888	9.22928	9.3486	9.36091	9.67004	9.3353	9.34661	9.274	10.184	9.7961	9.68646	9.80511	9.46967	9.46745	9.66935	9.54182
Les.502.2.S1_at	Les.502.2	0.000176132	0.00470108	9.14499	9.34544	9.1953	9.37532	9.21245	9.32199	9.39917	9.05257	9.01196	9.52804	9.15205	9.47098	9.61898	9.80366	9.78708	9.84489	9.55696	9.65942	9.91686	9.64749	9.76619	9.17762	9.77071	9.34573	9.37094	9.35498	9.8631	9.65004	9.54872	9.38286	9.69559	9.45109	9.4345	9.34879	9.50939	9.09541	9.37995	9.3917	10.0438	9.82338	9.59691	10.0263	9.6815	9.74198	9.62039	9.72056
Les.502.3.A1_at	Les.502.3	0.000816762	0.0177697	10.2755	10.2716	10.3207	10.51	10.0876	10.3138	10.3647	10.0177	9.95054	10.3326	10.223	10.3214	10.7855	10.6192	10.6684	10.8204	10.5053	10.5223	10.9094	10.5802	10.9331	10.3544	10.6365	10.4396	10.2807	10.1624	10.7967	10.8211	10.6035	10.4513	10.5566	10.1276	10.7289	10.4454	10.4438	10.2076	10.4056	10.3261	11.0003	10.7319	10.5444	10.9331	10.4731	10.6279	10.5151	10.6181
Les.5044.1.S1_at	Les.5044.1	0.000420809	0.0100567	11.9273	11.7253	10.5836	10.5557	11.0747	11.1264	10.8743	9.79706	10.514	10.1506	11.185	10.7157	9.08384	8.37254	8.33449	9.27762	8.85131	8.72896	8.79006	8.22947	8.72674	8.82779	8.76872	8.89424	8.21945	8.79187	9.79174	8.93197	9.4284	8.50576	8.63072	7.89481	9.51009	9.38944	9.28359	8.41998	8.82016	7.61879	10.4132	10.0474	9.17316	8.49593	8.91585	9.42371	9.24596	9.77792
Les.5051.1.S1_at	Les.5051.1	0	0	5.98135	5.83141	5.76009	5.80907	5.59733	5.48579	5.59489	5.3048	5.89213	6.0426	5.71536	5.75207	5.86266	6.15057	5.34859	6.70418	6.66561	7.3981	5.72069	5.61572	6.10167	6.87438	5.96077	5.89106	5.93121	5.95637	8.10068	6.84559	7.51777	5.87182	5.6364	5.78597	7.57846	8.19342	7.43613	6.28971	5.46317	6.25784	9.74043	9.84268	9.02217	5.89508	5.4009	5.71189	8.84301	9.13216
Les.5057.1.S1_at	Les.5057.1	0.00102949	0.0216695	7.63122	7.66396	8.30486	8.36759	7.92611	7.61934	8.24077	7.71859	8.63843	7.87802	8.01303	7.79559	6.55545	7.11566	7.04062	6.35582	4.97557	6.20707	6.57206	7.69679	5.08518	5.74814	5.43699	4.83808	5.54186	4.64061	5.74736	5.9078	4.87216	4.55852	5.12116	5.02052	5.58894	5.04088	5.01791	5.08975	4.72358	5.78965	6.46645	7.05823	6.17758	7.17255	4.67629	5.17398	6.33871	6.10073
Les.5075.1.S1_at	Les.5075.1	8.32081e-05	0.00248568	13.0617	13.1199	12.9426	13.0784	13.0189	13.1688	13.1495	12.9891	13.0307	13.1095	13.1339	13.1828	11.5976	11.4194	11.5267	11.066	12.0697	11.8217	11.2887	11.4504	12.1469	11.7028	12.1851	9.66129	9.90305	10.4118	8.40157	9.12645	9.17827	9.82261	9.66473	9.74707	9.38145	9.52378	9.54456	9.92115	9.43682	9.46351	8.37298	8.74402	9.24844	8.51338	9.38051	9.50495	9.41015	9.70613
Les.5076.1.S1_at	Les.5076.1	0.00142956	0.0286169	10.1547	10.0474	10.2336	10.3227	9.9573	10.0083	10.4378	10.0976	10.1355	10.3267	10.416	10.3377	10.437	10.5625	10.5392	10.6288	10.4118	10.4139	10.6928	10.6148	10.1909	10.5197	10.3564	10.674	10.7337	10.3862	10.9408	11.0333	10.612	10.6572	10.6509	10.7742	10.996	10.9051	10.7554	10.4443	10.4632	10.844	11.3582	11.2802	11.0028	11.0631	10.4712	10.5475	10.9846	10.9976
Les.5077.1.S1_at	Les.5077.1	0.000335455	0.00819333	7.43557	6.95037	7.071	7.75332	7.55673	7.5211	7.82954	7.30991	7.69532	7.91726	8.04031	8.04676	8.23763	8.35154	8.27828	8.7109	7.96914	7.85467	8.55296	8.10409	7.3427	8.29216	7.83179	8.36219	8.15388	7.72797	8.65785	8.68625	7.92991	8.07302	8.37207	7.99871	8.41377	8.29746	8.29321	7.70673	7.98861	8.09214	9.03762	9.0337	8.6585	8.90271	7.92158	7.94317	8.58202	8.54674
Les.5091.1.S1_at	Les.5091.1	5.19753e-05	0.00166128	8.49865	8.51252	7.97662	7.80604	8.9227	8.11199	7.57788	7.29991	7.62654	8.10358	8.63104	7.94215	8.25691	8.46382	8.12211	8.75202	8.19078	8.3859	8.16222	8.00829	6.24539	8.24599	6.86038	8.09714	8.32162	6.26452	8.24737	7.73305	7.02484	7.39076	6.11899	7.89693	8.5322	8.81564	7.68937	6.57368	5.86789	7.51576	8.88034	9.40653	8.99431	7.72052	5.38118	6.51276	8.41495	8.73498
Les.5092.1.S1_at	Les.5092.1	6.43134e-05	0.00198223	5.95748	6.23992	6.34478	6.29386	6.52123	6.14086	6.44958	6.68203	6.58069	6.60921	6.72657	6.31736	6.84699	6.60223	6.88101	7.3632	6.95093	7.36945	7.22188	6.71059	6.18454	7.13763	6.30365	7.49503	7.35382	6.08221	7.92957	7.3297	6.75665	6.80193	6.79132	7.62264	7.92239	7.75887	7.08471	6.55261	6.42859	7.61564	8.53087	8.90964	8.31804	7.88105	6.24503	6.50912	8.37101	8.48382
Les.5121.1.S1_at	Les.5121.1	1.39475e-05	0.000561296	9.15226	9.09857	9.23028	8.82399	8.74783	8.68851	8.75515	9.23425	8.84536	8.82997	8.97321	8.85026	6.42963	6.15319	6.44955	6.01386	6.42622	5.95976	6.89168	6.64166	6.66165	5.92114	6.70283	7.31869	7.40428	7.51041	7.47965	8.003	7.78649	7.12227	7.32514	7.78366	7.45601	7.03905	7.89704	7.75149	7.59228	7.60948	7.24212	6.47575	6.96041	7.83241	8.67391	7.9611	8.06803	7.57982
Les.5157.1.S1_at	Les.5157.1	6.45518e-05	0.00198172	13.881	13.898	13.8228	13.8455	13.8139	13.9123	13.8784	13.8838	13.8382	13.8061	13.8585	13.8353	13.6913	13.6934	13.7224	13.5932	13.744	13.8084	13.6366	13.6783	13.7743	13.8316	13.7978	13.1921	12.9892	13.2981	12.8099	13.2058	13.2153	13.0993	13.2416	13.0775	13.2875	13.1928	13.1135	13.1157	13.1829	12.9766	12.7027	12.3097	12.2459	12.809	13.3489	13.1912	13.206	12.9642
Les.5183.1.S1_at	Les.5183.1	0.000325322	0.00799613	9.98447	9.7766	9.26976	9.63788	9.41363	9.44413	9.60958	9.09981	8.99642	9.13345	9.12474	9.08045	9.60918	9.57777	9.54632	9.95349	9.32767	9.82217	9.65045	9.50161	9.37094	9.50862	9.42958	9.39073	9.61538	9.46763	9.77106	9.7673	9.59291	9.78496	9.80067	9.52437	9.77502	9.63806	9.70468	9.58883	9.83255	9.69411	10.5005	10.4252	10.4104	10.069	9.65274	10.0398	9.98349	10.2027
Les.5215.1.S1_at	Les.5215.1	0.00108749	0.0227057	8.68498	8.49633	8.57056	8.71885	8.50736	8.52792	8.46379	8.24273	8.34236	8.6417	8.52692	8.4651	9.59317	9.69975	9.66587	9.9413	9.45761	9.54772	9.57981	9.49873	9.60142	9.49984	9.43208	9.78796	9.74033	9.4969	10.1881	10.1142	9.87267	9.87755	9.95426	9.66816	9.78299	9.68357	9.9275	9.75124	9.90987	9.78753	10.4138	10.3606	10.1235	10.1643	9.72883	9.86152	9.8815	9.94162
Les.5229.1.S1_at	Les.5229.1	0.000415564	0.00996198	8.43081	8.32612	7.85396	9.20057	8.30518	8.72157	8.72777	7.93389	9.00031	8.72017	9.36052	9.43413	6.50487	6.40148	6.2893	6.51133	6.90279	7.56449	6.82358	6.57024	6.13685	6.85084	6.34838	6.50832	6.74085	6.93602	6.13827	6.26785	5.84396	7.08886	6.33894	6.18206	6.18772	6.4537	5.84577	6.52174	6.7742	6.63511	7.1851	7.90844	7.16452	6.1615	5.87679	6.2265	6.59518	7.26094
Les.5248.1.S1_at	Les.5248.1	0.00155222	0.0302918	9.72479	9.70769	9.72326	9.74799	9.86874	9.8005	9.76581	9.66067	9.68421	9.65326	9.84072	9.85673	9.84102	9.9289	9.94468	10.1823	9.88765	9.64774	10.1911	10.0217	10.044	9.74206	9.90772	10.2104	10.1377	10.0931	10.502	10.55	10.3106	10.1448	10.403	10.1495	10.3426	10.3026	10.5508	10.1023	10.0898	10.2167	10.8325	10.7575	10.3503	10.5145	10.1557	10.0667	10.4343	10.5103
Les.5293.1.S1_at	Les.5293.1	5.96046e-07	3.42925e-05	10.8413	10.446	10.0362	10.2132	10.4232	10.4769	10.1234	10.0026	10.176	10.2024	10.4077	10.0766	9.85127	9.99505	9.78449	10.2918	10.2925	10.5485	9.80424	9.61278	9.69432	10.4527	9.80341	9.37909	9.63423	8.92626	9.8327	9.75629	9.27069	9.39257	9.12679	9.53417	10.11	10.0903	9.63911	9.28418	8.57092	9.60799	10.3412	10.7347	10.442	9.6383	8.44161	8.91775	10.2214	10.3669
Les.53.1.S1_at	Les.53.1	0	0	9.31128	9.41929	9.33262	9.44787	9.40709	9.48221	9.61617	9.46398	9.53007	9.54076	9.77337	9.96992	9.94341	9.88198	9.8821	10.3493	10.117	10.2878	9.96027	9.89524	9.67007	9.74923	9.68812	10.4064	10.341	10.005	10.4634	10.4074	10.1539	10.0897	10.1289	10.2374	10.6517	10.529	10.2059	10.0862	10.0331	10.4225	11.1146	10.9678	10.8117	10.6529	10.129	10.1812	10.8693	10.9986
Les.5399.1.S1_at	Les.5399.1	0.00154233	0.0301745	6.59332	6.67201	6.80466	6.52047	6.9522	6.63443	6.80937	6.57174	6.74226	7.08423	6.81167	6.72235	7.23389	7.28434	7.09337	7.12156	7.20925	7.28718	7.2039	7.17093	6.9734	7.23097	7.15463	7.38675	7.60096	7.94096	6.74001	7.19368	7.16363	7.74147	7.45405	7.21294	6.7869	7.09837	7.03731	7.83205	7.67189	7.3047	6.92225	6.55194	7.36208	7.08254	7.35346	7.39685	7.11999	7.24879
Les.5443.1.S1_at	Les.5443.1	0.000693202	0.0155161	8.29157	8.18279	8.17198	7.93923	8.18556	8.05142	8.30209	7.92632	8.14925	8.20679	8.13485	8.37401	8.54457	8.57085	8.56332	8.5507	8.0951	8.09569	8.84032	8.28605	7.90802	8.28243	8.2198	9.00927	8.81813	8.4918	9.37259	9.59005	8.97774	8.83184	9.08641	8.61223	9.34486	8.90141	9.27741	8.55163	8.6412	9.07087	10.0033	9.31189	9.20039	9.85398	9.03515	8.87502	9.22892	9.21235
Les.546.1.A1_at	Les.546.1	2.51532e-05	0.000912919	9.49039	9.00013	8.89016	9.05537	8.4679	8.9841	8.49311	8.35688	8.52549	9.11854	9.3003	9.42732	10.0859	9.88534	9.72728	10.4288	10.0123	10.0754	10.1942	9.92355	10.202	9.93269	9.87874	10.1557	9.87943	9.86258	10.6692	10.4688	10.3891	10.1706	10.2765	9.7314	10.394	10.351	10.5406	9.87979	9.87282	9.85764	10.6102	10.6162	10.3705	10.3891	9.79888	9.66684	10.3885	10.3813
Les.5481.1.A1_at	Les.5481.1	0.00102371	0.0216653	5.46287	5.18514	5.71218	5.48487	5.30835	5.28647	5.16305	5.36638	5.5022	5.37161	5.41868	5.4258	6.58104	6.35808	6.19516	6.73254	6.82275	6.37051	6.46487	6.30309	6.15563	7.04137	6.04461	6.35099	6.01761	6.20138	6.64889	6.70124	6.26516	6.38324	6.21248	5.97695	6.14908	6.47526	6.48999	5.45717	5.47958	5.69709	6.23891	6.51395	5.94918	5.55814	5.68808	5.62338	5.5194	5.8383
Les.5481.1.S1_at	Les.5481.1	0	0	10.107	9.98432	10.1573	9.96384	10.3527	10.3724	9.98276	10.1714	10.1038	9.90938	10.0558	10.2012	10.8306	10.7848	10.5069	10.9588	10.6698	10.7683	10.8031	10.6991	10.4838	10.8483	10.8471	10.5162	10.4318	10.6726	11.185	10.7007	10.5667	10.5661	10.8506	10.3779	10.871	10.8733	10.9074	10.2949	10.1296	10.508	11.4995	11.5026	11.0504	10.79	10.1748	10.0925	10.8967	11.1268
Les.5485.1.S1_at	Les.5485.1	0.00281143	0.0490705	12.9789	12.8313	12.4327	12.6148	12.6608	12.7824	12.6144	12.163	12.2782	12.3636	12.5546	12.3056	11.1977	11.1653	10.9767	11.363	11.4103	11.2612	11.1065	10.9353	11.3672	11.2123	11.3536	10.7708	10.7975	10.8582	11.1764	11.0661	10.8835	10.8156	10.971	10.5981	11.0672	10.9055	10.9486	10.5833	10.8408	10.676	11.21	11.3	11.0295	10.9981	10.8176	10.8433	10.9824	11.1024
Les.5514.1.S1_at	Les.5514.1	3.59416e-05	0.00121903	9.90258	9.93607	9.59888	9.62968	9.56007	9.61254	9.46272	9.21691	9.31674	9.53731	9.49832	9.394	9.54278	9.73002	9.55589	9.70202	9.44247	9.6583	9.56419	9.61147	9.47379	9.61628	9.35409	9.3824	9.54485	9.16511	9.48855	9.66266	9.35377	9.58485	9.1599	9.52693	9.61148	9.64513	9.4497	9.19282	9.06125	9.34331	9.70174	9.84439	9.96535	9.46074	8.93737	9.17499	9.48199	9.72397
Les.5530.1.S1_at	Les.5530.1	0	0	11.7753	11.7554	10.1982	10.3113	11.4117	10.8244	10.0897	9.71659	9.97756	10.3129	10.511	9.83144	9.3736	9.27853	8.77566	10.2998	10.1854	10.0518	8.98766	8.94069	10.0506	10.3736	9.73734	8.59347	8.36103	7.80844	10.3762	9.59724	9.51434	8.50269	9.09977	8.52524	10.0932	10.2331	9.98996	7.87315	7.55417	8.60556	10.7085	10.9296	10.4679	9.45236	7.3754	7.24085	10.4835	10.3885
Les.5555.1.S1_at	Les.5555.1	0	0	10.8171	10.8509	10.1642	10.2426	10.5708	10.4867	10.4101	10.0016	10.2197	10.253	10.6507	10.1625	9.31717	9.13205	9.18808	9.68346	9.24663	9.54808	9.34745	8.99669	9.0883	9.38516	9.13918	8.89348	8.69461	8.22829	9.22135	9.07579	8.93056	8.40152	8.78481	8.69037	9.48266	9.32833	9.17494	8.41925	8.21864	8.69597	9.98365	9.67047	9.39799	9.22007	8.26165	8.51821	9.64605	9.84798
Les.5597.1.S1_at	Les.5597.1	2.41995e-05	0.000890793	5.02496	5.08372	4.94715	5.27046	5.00447	5.11454	5.61754	4.92493	4.88937	5.22905	5.10252	5.25684	6.09521	5.79935	5.60716	5.9114	5.04893	5.61967	5.49174	5.0196	4.90093	5.45496	5.02598	5.21747	5.12164	4.72102	6.03011	5.11184	4.91517	4.89652	5.18737	5.09456	5.84648	5.46741	5.19902	5.05148	5.16091	5.35027	7.03572	7.4041	5.97434	5.92276	5.20244	5.3361	7.04247	6.69848
Les.5758.1.S1_at	Les.5758.1	1.66297e-05	0.000645814	7.70013	7.75163	7.64529	7.66192	7.73068	7.79647	7.91605	7.75637	7.80395	7.86343	7.85316	7.86169	8.08646	8.13848	8.07046	8.12645	8.37851	8.16656	8.22529	8.12566	8.31791	8.08511	8.20023	8.73259	8.93045	8.982	8.36838	8.52081	8.63115	8.96474	8.81338	8.71579	8.40918	8.49452	8.62419	8.97284	8.8324	8.70826	8.36246	8.40535	8.53077	8.53662	8.68773	8.59471	8.54652	8.52859
Les.5759.1.S1_at	Les.5759.1	5.96046e-08	4.13348e-06	8.58848	8.61422	8.01727	9.42124	7.82985	8.21722	9.22234	8.15734	7.81867	9.26686	8.90162	9.57225	9.80642	10.0451	9.3452	10.135	9.98823	9.94176	9.87701	9.50798	8.9838	10.1317	9.72902	10.5926	10.2842	10.4213	11.3175	11.0308	10.5954	10.7559	10.7561	9.48414	10.8288	11.0202	11.2898	9.78785	10.009	10.0675	12.1752	11.839	11.4077	11.1621	9.82634	10.173	11.1494	11.4842
Les.5790.1.S1_at	Les.5790.1	7.68304e-05	0.00231295	7.94589	7.92217	8.29487	8.64907	8.29734	8.66272	7.97482	7.86259	8.18052	8.90093	8.54151	8.68803	8.06899	8.15787	8.15654	8.40972	8.13983	8.1779	8.08461	8.06063	7.63082	8.6103	7.94375	8.07736	8.30156	7.76708	8.18709	8.57305	8.03199	8.25902	7.96888	8.05727	8.34576	8.36697	8.34132	7.83598	7.9107	8.25313	8.70615	8.79005	8.57175	8.26895	7.76888	8.07997	8.3335	8.57053
Les.5794.1.S1_at	Les.5794.1	0.00027138	0.00693358	9.60795	9.73486	9.37029	10.072	9.99418	10.1448	9.59327	9.46743	9.837	9.73542	9.73853	9.65142	9.42053	9.26453	9.20041	9.54007	9.75707	9.70357	9.15143	9.13852	9.67755	9.85545	9.40468	9.32315	9.17477	9.28008	9.1491	8.99232	8.68773	9.23701	8.98565	9.33809	8.94347	9.15345	9.01073	9.42357	9.06117	9.25366	9.12422	9.53332	9.41315	8.91498	8.93833	9.28362	9.21358	9.22464
Les.5848.1.A1_at	Les.5848.1	0.000209987	0.00549148	8.41498	8.30983	8.5305	8.21878	8.30856	8.11687	8.06987	8.23014	8.25667	7.90806	7.98155	7.62818	7.88273	7.63987	7.53352	7.72701	7.82501	7.58882	7.7641	7.70786	8.47881	7.59408	8.18497	7.9723	7.99573	8.00562	8.39721	8.85016	8.2645	7.86767	8.17062	7.94915	8.1965	8.0779	8.2716	8.0604	8.00762	7.84013	8.54188	8.71334	8.19228	8.04288	8.25951	7.5032	8.63662	8.44369
Les.5884.1.S1_at	Les.5884.1	0	0	11.7603	11.6241	10.9877	11.2608	11.228	11.8417	10.9345	10.7285	11.1392	10.5992	11.4996	11.6855	9.81055	9.78509	8.89814	10.0732	10.4949	10.9208	9.27261	9.45083	9.55766	10.4479	9.56133	9.40914	9.3635	9.27529	9.89761	9.62825	9.45042	9.41238	9.11642	9.28522	10.1612	10.4669	9.7108	9.22908	8.85054	9.29837	10.9425	11.2853	10.7498	8.64269	8.69442	9.2284	10.2805	10.7752
Les.5915.1.S1_at	Les.5915.1	0	0	4.93005	4.92026	4.77786	4.8064	4.5919	4.89404	5.07974	4.8777	4.77175	5.08186	5.14576	4.78591	6.83028	7.40532	6.64367	8.19561	7.67173	8.91238	7.34428	7.26927	7.22865	8.53955	7.37353	8.28872	7.52519	5.40637	9.81824	9.21481	8.46323	7.34952	7.08586	7.93906	9.99428	10.0068	9.37766	6.97352	6.43138	8.9533	11.4623	11.6271	10.7564	9.45244	5.56764	6.91405	10.5886	10.6713
Les.5934.1.S1_at	Les.5934.1	0	0	5.76423	5.60192	5.64741	5.94886	5.83558	5.97634	5.92938	5.27181	5.59323	6.14264	5.66012	5.77805	6.26587	6.74784	6.15171	7.42614	7.14602	8.55945	7.0617	7.05911	6.27569	7.30866	7.05661	7.22898	6.54459	6.32899	9.0059	8.2857	8.37018	6.78675	6.05655	7.28482	9.27853	9.12173	8.61106	5.74937	6.09046	7.82759	10.3762	11.0154	9.86266	7.92591	5.76565	6.22885	10.0507	10.4572
Les.5939.1.S1_at	Les.5939.1	4.91738e-05	0.00159139	12.2717	12.7388	11.382	10.6583	11.7817	11.4091	11.2922	10.737	10.8319	10.9754	11.3375	10.7989	9.58313	9.11917	8.69558	9.68471	9.82764	9.41986	9.22128	8.57006	9.55142	9.68967	9.47596	9.0951	8.57142	8.61338	9.4146	9.16747	9.0561	8.64756	8.68357	8.12548	9.51104	9.50714	9.08416	8.48499	8.44739	8.40155	10.0212	9.52588	9.45306	9.41447	8.58253	8.54836	9.54455	9.7719
Les.64.1.S1_at	Les.64.1	9.52482e-05	0.00279167	9.977	10.2272	10.4258	9.45025	10.0038	9.64173	9.61014	9.95481	9.91869	9.28992	9.27571	9.22251	6.98793	6.47675	6.59674	6.95811	6.29692	5.92937	6.6832	6.62877	7.28918	6.22301	6.91844	6.49222	6.31753	6.28222	6.8268	7.21311	6.66851	5.45197	6.38075	6.06944	6.41666	6.00801	6.02307	6.10998	6.75843	6.5921	5.59155	5.52227	5.61167	6.7812	7.30146	5.93741	6.86143	6.19835
Les.656.1.A1_at	Les.656.1	0.00272793	0.0479362	11.9732	11.9933	12.3024	12.1986	12.1701	12.0773	12.2214	12.4496	12.298	12.1822	12.3065	12.2486	11.8499	11.3987	11.6442	11.7256	11.8017	11.5184	11.7896	11.3578	11.6819	12.0494	11.7886	10.4811	10.0049	10.8046	9.79172	10.6017	10.7294	9.89405	10.4042	10.5491	10.5385	10.9051	10.8305	10.3185	9.55631	9.83889	8.6981	8.68585	9.10214	8.61707	10.2185	9.71609	10.2632	9.85018
Les.683.1.S1_at	Les.683.1	0.000843942	0.0183098	8.10348	8.04196	8.09398	7.49838	7.75527	7.64695	7.89147	7.72404	7.82038	8.14047	7.66022	7.77953	7.121	7.20652	7.08322	7.29915	7.17342	7.02884	7.19282	7.23099	8.05848	7.25658	7.43335	7.12689	7.0731	7.26502	7.18036	7.32565	7.1697	7.44458	7.07204	7.01356	7.17673	7.20437	7.07408	7.29209	7.27974	7.05146	6.92246	7.07123	7.02848	6.95036	7.01542	7.32141	6.76373	6.84041
Les.683.3.A1_at	Les.683.3	0.00166702	0.0322084	8.30197	8.41826	8.45111	7.99108	7.90953	7.82898	8.04939	7.96417	8.13519	8.23236	7.89474	8.05956	7.33802	7.11566	7.20198	7.26582	7.43772	7.26973	6.98626	7.36936	7.99212	7.61279	7.64498	7.28934	7.10363	7.2536	6.89602	7.37548	7.33982	7.33794	6.9741	6.81538	7.04145	7.25193	7.48309	7.39445	7.43988	7.20522	7.11979	7.05943	7.02867	7.15209	7.44582	7.56619	7.08346	7.00691
Les.72.1.S1_at	Les.72.1	0.00127167	0.0257886	10.9811	10.8755	11.1011	11.0907	11.157	11.0045	11.0526	11.0526	11.1283	11.0314	10.8997	10.9306	10.9879	10.7285	11.0033	11.2379	10.5317	10.5756	10.9598	10.6958	10.8395	10.7072	10.6448	10.6425	10.1631	9.82477	11.1967	10.6339	10.4148	10.0065	10.661	10.8791	10.8965	10.8549	10.4754	9.79696	9.96585	10.761	11.3045	11.4616	10.9426	10.565	10.2867	9.87494	11.1516	10.9227
Les.731.1.S1_at	Les.731.1	1.38283e-05	0.000562326	6.61235	6.83281	6.72091	6.22921	6.75838	6.52199	6.67096	6.54818	6.80326	6.98132	6.8821	6.87263	7.09723	7.25004	7.00706	6.9261	7.33022	7.11146	6.90142	7.2401	6.92743	7.21432	7.13268	7.59034	7.9757	8.25519	6.96973	7.24838	7.27878	7.98815	7.40769	7.72813	7.50122	7.67797	7.43166	7.9344	7.82686	7.64898	6.8973	7.31404	7.44512	6.83404	7.57575	7.66911	7.36592	7.44298
Les.733.1.S1_at	Les.733.1	0.00232047	0.04211	8.49388	8.38369	8.59691	8.52908	8.3105	8.23156	8.60178	8.38308	8.38038	8.55158	8.46134	8.39055	8.22106	8.26348	8.16655	8.32605	7.9414	8.08903	8.32039	8.28213	8.23306	8.0468	7.95421	8.2973	8.39696	7.90807	8.61238	8.86683	8.28711	8.10522	8.04454	8.25751	8.6249	8.55678	8.43101	8.1832	7.87191	8.59563	9.01033	8.94445	8.76555	8.6885	7.99582	7.82526	8.74921	8.71162
Les.764.1.S1_at	Les.764.1	0	0	4.32577	4.50888	4.28543	4.28675	4.44692	4.64198	4.5295	4.40052	4.34453	4.39647	4.46506	4.5237	4.30271	4.28282	4.04985	4.29748	4.17996	4.33043	4.21798	4.03787	4.49931	4.22497	4.31192	4.08586	4.49432	4.11986	4.71474	4.34811	4.30409	4.02663	4.07736	4.40297	4.21453	4.2639	4.59465	4.43045	4.27316	4.46115	6.92369	7.02901	5.86955	4.54003	4.39992	4.29799	5.31759	5.86046
Les.764.2.A1_at	Les.764.2	0	0	4.10393	3.90527	4.06867	4.17055	3.97223	4.0069	3.99184	4.09163	4.15976	4.21769	4.32747	4.17649	4.12816	4.03654	3.97353	4.05078	4.09874	3.83071	4.06935	4.00038	3.89474	4.09962	4.03266	4.04019	4.05272	3.99455	3.93973	3.92509	4.06947	4.19755	3.92232	4.09368	4.10739	4.38432	4.21662	4.17178	4.00972	4.14375	7.19196	7.06258	5.95425	4.04479	3.91114	4.04336	5.33827	5.76042
Les.781.1.A1_at	Les.781.1	4.94122e-05	0.00159247	4.82013	5.09688	4.98468	5.94952	7.41061	5.92642	7.72107	7.72405	7.0678	6.92791	7.2402	6.18983	4.82284	4.92809	5.26104	5.04725	4.89763	4.76551	4.6371	4.62928	4.27723	4.84637	4.24599	4.31781	4.91657	3.99384	3.77755	4.14864	3.62563	4.82021	4.15383	4.45179	4.25524	4.17644	4.24556	4.16642	4.30856	4.04501	3.6865	3.96293	4.08232	4.01824	4.09061	4.11795	3.87536	4.20153
Les.797.1.S1_at	Les.797.1	9.0301e-05	0.00267698	11.371	11.146	10.8458	11.912	10.6987	11.5046	11.3631	10.4265	10.4521	11.4903	11.6432	11.9238	11.915	11.9546	11.9549	12.0703	11.4712	11.3206	12.0426	11.9613	11.3119	11.5243	11.9811	12.3319	11.9605	11.7177	12.5689	12.6314	12.2638	12.0706	12.3055	11.8746	12.5777	12.3329	12.5496	11.4956	11.4819	12.0566	13.1094	12.8191	12.7214	12.8695	11.6628	11.4185	12.5506	12.6805
Les.87.1.S1_a_at	Les.87.1	0.00152516	0.0300659	9.46879	9.61744	9.43106	9.06501	9.13558	9.31284	8.54806	8.63125	8.88443	8.85321	8.77426	8.70822	9.21864	9.20961	9.33174	9.30856	9.25621	9.0953	9.17351	9.37786	9.37902	8.9951	9.25885	9.25105	9.30867	9.15498	9.57224	9.73189	9.47528	9.38804	9.7164	9.48623	9.50746	9.2607	9.64267	9.29241	9.45126	9.47367	9.66371	9.7216	9.38947	9.52285	9.51218	9.36226	9.438	9.38058
Les.923.1.S1_at	Les.923.1	0.00219202	0.0403446	11.5384	11.4853	11.5006	11.6839	11.6705	11.7273	11.5717	11.3346	11.4979	11.5881	11.5694	11.5814	10.8511	10.82	10.8654	10.9429	10.7304	10.7266	10.8094	10.8025	10.8931	10.9205	10.794	10.5653	10.6131	10.3534	10.8978	10.7704	10.5582	10.3842	10.5336	10.7585	10.9996	10.7979	10.7364	10.3684	10.2151	10.6546	10.8791	11.0961	10.7227	10.7179	10.3001	10.2386	10.9844	10.8539
Les.926.1.A1_at	Les.926.1	0.00173771	0.0332434	7.39914	7.49486	7.70006	7.23814	7.27039	7.39348	7.24764	7.38115	7.41671	7.51616	7.44917	7.44735	7.56616	7.78162	7.5302	7.46841	7.90856	7.66061	7.34743	7.70328	7.64703	7.91102	7.77411	8.61096	8.43992	8.9651	7.75456	8.03855	8.26437	8.53896	8.13695	7.76696	7.82403	7.9947	8.03189	8.9165	8.77797	8.34733	7.82379	7.94354	8.53376	7.7507	7.92919	8.10521	7.83205	8.19538
Les.928.1.S1_at	Les.928.1	4.81606e-05	0.00157832	13.6891	13.7042	13.6833	13.7263	13.8282	13.8007	13.7296	13.7741	13.8401	13.7423	13.8101	13.7672	13.512	13.6526	13.581	13.4932	13.6482	13.6453	13.4752	13.6336	13.5213	13.5135	13.5791	13.1177	13.1887	13.2812	12.6675	12.812	12.9944	13.0493	13.039	13.3166	13.1405	12.9689	12.9557	13.1899	13.0385	13.0149	12.5949	12.7513	12.8399	12.6317	13.13	13.0145	12.9967	13.0933
Les.931.1.A1_at	Les.931.1	0.000884235	0.0189197	11.5829	11.3006	10.8592	10.7016	10.3805	10.6802	10.3167	9.73526	10.1501	10.3423	10.3137	10.3355	9.56537	9.24395	9.27451	9.63914	9.6038	9.68988	9.53452	9.37193	9.86598	9.65574	9.51387	9.41107	9.08308	9.35912	9.30514	9.57768	9.62011	9.4209	9.33552	8.98878	9.71642	9.52636	9.53993	9.48142	9.46605	9.46643	9.56852	9.42886	9.60599	9.6323	9.40422	9.29175	9.56887	9.68361
Les.97.1.S1_at	Les.97.1	0.000102937	0.00297217	7.19132	7.22642	7.17024	7.55724	7.32204	7.44219	7.40581	6.91583	7.35436	7.38928	7.41234	7.52248	7.5767	7.48683	7.61184	7.82554	7.36765	7.30784	7.89997	7.74502	7.63579	7.25273	7.37966	7.69782	7.71442	7.53718	8.18736	8.53168	8.44323	7.73417	8.11186	7.82764	8.22607	7.91443	7.97015	7.60604	8.02216	7.81147	8.20691	7.95059	7.6887	8.0909	8.10366	7.67708	8.14583	7.8341
LesAffx.1.1.S1_at	LesAffx.1.1	4.22001e-05	0.00141279	6.47397	6.83768	7.74869	11.0622	9.7676	10.161	7.6336	7.64669	10.0113	9.30918	7.61655	10.0723	11.0247	10.6226	11.1659	11.4789	11.1312	11.0837	10.7247	10.96	9.93023	10.5289	9.68262	8.03983	8.46114	9.03039	10.2113	7.66296	7.60991	9.08928	9.40793	10.5746	8.68568	9.1295	8.37697	8.15024	8.91155	8.72061	7.65917	10.2949	8.59323	8.56102	7.52907	8.13026	9.35205	7.99984
LesAffx.10091.1.S1_at	LesAffx.10091.1	2.3067e-05	0.000865514	8.40121	8.14914	9.75307	10.764	11.1168	10.5896	9.90225	9.70857	11.03	9.65366	9.37144	9.60031	7.63674	7.1838	7.51072	8.86217	6.89682	7.55838	7.37652	7.38532	6.85753	6.93009	6.25427	6.53329	5.943	5.97393	8.85947	6.21503	5.98674	6.13311	7.30662	8.14278	7.1906	7.04936	7.0516	5.33094	5.39651	6.34948	8.12359	8.87508	7.55298	6.50143	5.2211	5.20549	7.34958	7.3541
LesAffx.10176.1.S1_at	LesAffx.10176.1	0	0	5.4521	4.91995	5.56865	7.46545	7.92108	7.92964	6.70754	6.591	8.35548	6.43607	6.34822	6.41247	4.18963	4.16283	4.22265	4.35846	4.27491	4.38609	4.01059	4.24015	4.39344	4.21594	4.51021	4.39391	4.51908	4.40621	4.42237	4.42161	4.41444	4.36752	4.30068	4.6694	4.39181	4.4798	4.39533	4.2931	4.04339	4.40419	4.47912	4.37122	4.36609	4.15769	4.27511	4.34911	4.54732	4.2641
LesAffx.10289.1.A1_at	LesAffx.10289.1	0.00246024	0.0441309	10.7433	10.9135	10.8545	10.8175	10.9215	11.1229	10.8334	10.881	10.9304	10.8727	11.0948	11.1217	9.32502	9.32135	9.18375	8.80358	9.79285	9.73716	8.93539	9.30925	9.406	9.58004	9.78302	8.80914	8.89966	9.3712	7.88839	8.25867	8.27846	8.89756	8.56612	8.81221	8.48346	8.81109	8.47247	9.07977	8.7313	8.89951	8.11806	8.3595	8.80659	8.07397	8.54921	8.92729	8.60602	8.78026
LesAffx.10299.1.S1_at	LesAffx.10299.1	0	0	11.537	11.586	11.578	11.8853	11.4608	11.7027	11.4917	11.1756	11.3211	11.5536	11.6949	11.7019	11.2122	11.5999	11.4279	11.6317	10.9957	11.2508	11.594	11.3804	11.0464	11.1414	11.4051	11.1911	11.1863	10.9812	11.5823	11.2895	11.0688	11.3176	11.5092	11.2134	11.5365	11.4207	11.367	10.751	10.762	11.0822	12.1231	12.1135	11.7846	11.6358	10.613	10.5369	11.6248	11.897
LesAffx.1091.1.S1_at	LesAffx.1091.1	0.000849485	0.0183787	6.23521	6.25267	5.81981	5.98496	6.17407	6.24236	6.10845	5.78146	6.17338	6.01682	6.22951	6.47491	5.8734	6.15941	5.75529	6.12264	6.02473	6.02187	6.2228	6.06949	5.72969	6.397	6.24589	5.99407	6.01279	5.68187	5.85233	5.92675	5.36169	6.01173	5.81259	6.00284	6.14812	6.00737	5.50271	5.39351	5.18314	5.50448	6.21859	6.457	5.86243	5.70464	5.03684	5.22307	6.00996	6.05473
LesAffx.10955.1.S1_at	LesAffx.10955.1	0	0	8.45435	7.9782	7.07785	7.35918	7.992	8.27327	7.44212	7.24574	7.73077	7.92895	8.64241	8.51616	7.16254	7.48267	7.18924	7.98923	8.05381	8.34827	7.14952	6.94889	7.531	8.18418	7.66349	7.17717	7.14284	6.60198	7.91534	7.11263	7.21075	6.36527	6.97635	6.82576	7.94032	7.52684	7.53623	6.20504	6.03052	6.81405	8.53594	8.4907	8.09627	7.2226	6.50315	6.29755	8.08026	8.32321
LesAffx.10955.2.S1_at	LesAffx.10955.2	0	0	8.54725	8.14138	7.44444	7.96781	8.12717	8.34925	7.87263	7.49992	7.79021	8.16277	8.92578	8.62618	7.44003	7.54753	7.29048	8.25271	8.23504	8.45612	7.47884	7.06796	7.72589	8.34858	8.03132	7.24569	7.07042	6.57373	8.17113	7.3586	7.33413	6.63666	7.08412	6.84763	8.15689	7.89937	7.77686	6.82099	6.19191	6.86929	8.54584	8.75424	8.25892	7.43527	6.59654	6.29356	8.14484	8.58604
LesAffx.10955.3.S1_at	LesAffx.10955.3	0	0	8.92748	8.50428	7.36729	7.93212	8.51695	8.6691	7.63052	7.64516	7.90126	8.2871	9.24836	8.90505	7.84345	7.72054	7.54835	8.58192	8.51677	8.77043	7.62483	7.27529	7.92292	8.59305	8.33929	7.38261	7.37869	6.84616	8.44296	7.88959	7.55925	6.83482	7.32084	7.19302	8.40571	8.17428	8.00315	6.53123	6.34921	6.926	9.03481	9.07375	8.72186	7.65954	6.59475	6.68344	8.39335	8.80479
LesAffx.12647.1.S1_at	LesAffx.12647.1	0.000373602	0.00903977	6.85564	6.95208	6.91619	7.10547	7.23022	6.92046	7.0053	7.25393	6.94458	7.36762	7.18119	7.31051	7.08808	7.20539	6.97533	7.22266	6.91875	7.23656	7.00078	7.09912	6.95259	6.98102	6.97816	6.93153	7.27919	6.99617	7.59411	7.651	7.05609	6.96107	6.94202	7.31994	7.21938	7.22086	7.62343	7.17346	6.94793	7.1808	7.77216	7.61821	7.71253	7.40027	7.0336	7.01618	7.43007	7.43394
LesAffx.12670.1.S1_at	LesAffx.12670.1	0	0	5.42482	5.68562	5.63392	5.42791	5.66359	5.49144	5.4385	5.64436	5.57647	5.56282	5.80718	5.53267	5.30799	5.53664	5.23949	6.16655	5.93353	6.70377	5.60429	5.29787	5.91321	6.47135	5.78818	5.5826	5.64754	5.56133	6.00516	5.67175	6.15935	5.53077	5.39798	5.31532	6.08092	5.94258	6.04585	5.48709	5.67995	5.2381	7.56192	7.48475	6.96911	5.6368	5.43882	5.38104	6.80324	7.26062
LesAffx.12670.3.S1_at	LesAffx.12670.3	0	0	5.11731	4.88698	4.97393	5.19598	4.87934	5.04641	5.18194	4.90454	4.90931	5.3794	5.38472	5.54789	5.37687	5.31504	5.59682	6.86577	7.08448	8.03979	5.43977	5.38274	6.07043	7.17873	6.45535	5.50441	5.80652	5.18836	7.16163	6.3872	6.78276	5.29225	5.249	5.14207	7.27179	7.57096	6.84048	5.52559	5.1315	5.32822	9.33216	9.37762	9.00845	5.96267	4.67201	5.26777	8.68904	9.16527
LesAffx.15067.1.S1_at	LesAffx.15067.1	0.00069958	0.0156139	5.19939	5.10349	4.79679	6.02156	5.79776	5.41535	5.09537	4.98376	5.98218	5.3975	5.13475	5.37808	4.69865	4.65642	4.65502	4.80935	4.97917	4.73254	4.75088	4.69327	4.83077	4.58878	4.65977	4.785	4.84774	4.66517	4.5536	4.70815	4.806	4.77029	4.71815	4.63979	4.70645	4.57805	4.61962	5.08105	4.66424	4.84426	4.95097	4.84276	4.63532	4.70945	4.72531	4.69287	4.65621	4.72947
LesAffx.15850.1.S1_at	LesAffx.15850.1	0.000466883	0.0109887	7.91015	7.71125	7.43371	7.76137	7.95591	7.99357	7.96245	7.65523	7.77846	7.74305	7.97628	7.98353	7.1677	7.03819	6.96929	7.3944	7.23237	7.22505	7.19013	6.96619	7.23776	7.28861	7.40619	7.16637	7.13179	7.14027	7.58428	7.3956	6.99221	7.16194	7.2451	7.06384	7.59374	7.32938	7.24823	6.91579	6.88693	7.17908	7.87256	7.65839	7.4185	7.44194	7.08358	7.13148	7.54877	7.54988
LesAffx.15850.2.A1_at	LesAffx.15850.2	1.62721e-05	0.000635101	9.30243	9.08723	9.11904	9.25245	9.35319	9.45289	9.38339	9.19426	9.28497	9.24059	9.40166	9.36726	8.57594	8.56119	8.54056	8.63221	8.83464	8.59146	8.72903	8.36215	8.59987	8.71862	8.85587	8.55434	8.6189	8.60291	8.83567	8.79216	8.56683	8.52718	8.68843	8.48119	8.79603	8.74821	8.68208	8.34514	8.5316	8.58319	9.22541	9.07337	8.84294	8.91539	8.68489	8.70757	8.99393	8.9403
LesAffx.15878.2.A1_at	LesAffx.15878.2	0.000805616	0.017626	10.223	9.43094	8.80263	8.64822	8.74727	8.92932	7.78528	7.34359	7.89963	7.8024	8.40456	8.04422	7.336	7.40617	7.48328	7.39318	7.0409	7.55368	7.69351	7.22543	5.58163	7.27853	6.64508	6.466	6.58337	5.24726	6.71807	6.77219	5.96703	6.27731	5.7591	6.51986	7.23653	7.45476	6.18934	6.06116	5.15648	6.49442	7.3367	7.73372	7.33612	6.8229	5.177	5.60865	7.15843	7.5098
LesAffx.16086.1.S1_at	LesAffx.16086.1	4.8101e-05	0.00158305	6.35646	6.22782	6.16237	6.73365	6.00476	6.33584	6.27899	5.7222	5.92268	6.77757	6.01728	6.3521	9.03819	9.26082	8.73533	9.46788	8.15262	9.50136	9.03751	8.68775	6.24767	9.02701	6.37272	7.12774	7.29982	5.68339	6.82584	5.91246	6.09957	7.34045	6.63655	6.82193	7.24441	7.69298	6.32562	6.41288	5.81146	6.8121	8.04028	9.04909	8.41857	7.48363	5.52726	6.60621	7.36968	8.10795
LesAffx.1612.3.S1_at	LesAffx.1612.3	0.000793576	0.0175105	6.72346	6.75468	6.72332	6.78363	6.58471	6.78944	6.65323	6.39824	6.51962	6.56696	6.65671	6.73746	7.11766	7.22361	7.13481	7.05544	7.2374	7.05572	7.08191	7.20372	7.24453	6.70283	7.162	7.4219	7.46935	7.62227	7.04228	7.30803	7.14462	7.54777	7.35384	7.3823	7.23049	7.44814	7.23205	7.61981	7.53924	7.41137	7.07566	7.19822	7.2832	7.08674	7.32718	7.42317	7.18998	7.14459
LesAffx.16769.1.S1_at	LesAffx.16769.1	0	0	7.73997	7.15904	8.02252	8.93636	8.05536	8.15744	8.54521	7.77667	8.47483	8.82551	8.6754	9.17562	7.76728	7.22257	7.32293	8.2986	8.41375	8.52537	7.58855	7.92925	9.4758	8.89138	9.13346	7.28458	6.93483	7.38761	9.9987	9.47846	9.45243	7.37088	8.57114	7.1324	9.37596	9.05713	10.3579	7.20406	8.17165	7.30706	10.2416	9.54833	9.2483	8.5158	8.85567	8.49145	9.55778	9.4825
LesAffx.16925.1.S1_at	LesAffx.16925.1	0	0	9.31696	8.96672	8.77727	9.96166	9.39413	9.93248	9.02766	8.8289	9.64812	9.34821	9.63082	10.017	10.4396	10.3327	10.3242	10.9202	10.3371	10.8186	10.471	10.4606	10.3072	10.4173	10.314	10.1869	10.2347	10.1207	11.191	10.5519	10.4158	10.1905	10.4372	10.5619	10.7639	10.7664	10.7474	9.76032	9.64033	10.301	11.2569	11.7053	10.8975	10.3159	9.80084	9.90256	10.6608	10.7795
LesAffx.17017.1.S1_at	LesAffx.17017.1	1.49012e-06	7.87329e-05	11.1548	10.1567	9.0839	9.06209	9.25402	9.9302	8.29425	7.36049	8.57938	8.11773	9.38952	9.0195	6.85898	6.41436	6.55035	7.59257	7.12073	7.04814	7.32353	6.73142	7.19126	7.3143	7.2404	6.26619	6.26658	5.76865	7.90699	7.44404	6.59002	6.56385	7.44807	6.35982	7.34161	7.24779	7.24937	5.63457	5.95258	6.13551	7.76501	7.61803	7.4327	7.06127	5.71638	5.85913	7.12556	7.24679
LesAffx.17051.1.S1_at	LesAffx.17051.1	0.000902712	0.019262	6.05122	5.96543	6.46647	7.65683	7.63996	6.58659	6.2281	6.23695	7.35975	6.5333	6.01903	6.15418	6.07282	5.93604	6.09598	6.20009	5.9892	5.99945	6.20522	6.30582	6.53803	6.28398	5.94409	6.32494	6.20261	6.62041	6.72713	6.34324	6.29357	6.48123	6.27904	6.03405	5.93569	6.16038	6.17853	6.31205	6.73655	6.22497	6.07304	6.50388	6.52152	6.48205	6.40003	6.89597	6.26022	5.98977
LesAffx.17773.1.S1_at	LesAffx.17773.1	0.000370979	0.00900436	9.11611	9.23893	8.99868	9.99601	9.94129	10.1811	9.50917	9.50021	10.2024	9.59993	9.42325	9.99131	8.98126	8.83786	8.30729	8.3149	10.1937	10.2897	8.0985	8.37915	10.3776	10.0701	9.70489	7.24141	8.78805	8.54328	6.47857	6.74107	6.94834	8.97194	7.79206	7.61602	7.10674	7.32427	7.14287	7.25173	7.86024	7.50086	6.87898	7.15595	7.11333	6.90179	6.82433	7.49194	6.78387	7.10601
LesAffx.18587.1.S1_at	LesAffx.18587.1	0.000219285	0.00569629	9.61286	9.39716	9.17702	9.62588	9.17661	9.39541	9.8084	9.07576	9.41249	9.6732	10.0731	10.1328	9.97779	9.76511	9.6063	10.3931	9.57615	9.04199	10.6341	10.0544	10.0232	9.93622	10.3116	9.76305	9.1599	8.85173	10.8441	10.7391	9.88302	9.49264	10.5717	8.93125	10.4591	9.63572	10.8649	8.91191	9.64152	9.65986	11.3907	10.3655	10.2329	11.2549	10.5734	10.3505	10.0726	10.5925
LesAffx.1861.2.S1_at	LesAffx.1861.2	0.00167525	0.032287	8.18487	7.63182	7.68047	8.56823	8.14324	8.91338	8.88998	7.12123	8.07995	9.02675	8.8033	9.39412	10.1224	10.433	10.1766	10.3626	10.17	10.2677	10.6181	10.2524	10.037	9.92221	10.0665	10.3384	10.6412	10.3527	10.975	10.7087	10.7062	10.4979	10.9961	10.664	10.8388	10.4465	10.6404	10.4589	10.7274	10.7399	10.304	10.51	10.2563	10.9362	10.8108	10.1659	10.6027	10.4017
LesAffx.1959.1.S1_at	LesAffx.1959.1	3.26633e-05	0.00113765	10.7924	10.6071	10.9923	11.1246	10.6844	10.8046	11.1203	10.7905	11.033	11.0601	10.8959	11.1073	11.5752	11.1185	11.3955	11.8126	10.8461	11.0285	11.7181	11.213	11.3803	11.2565	11.4386	11.423	11.1812	11.068	12.3736	12.1441	11.7281	11.5014	12.0997	11.0506	12.0811	11.5618	12.1397	10.9164	11.3718	11.4584	12.8486	12.5186	11.7878	12.5286	11.6385	11.659	12.0882	12.0949
LesAffx.20391.1.S1_at	LesAffx.20391.1	0	0	9.97795	9.93758	8.76023	8.49926	9.27076	9.46883	8.65082	8.23092	8.57623	8.59118	9.51473	9.14603	7.6313	7.71297	7.49488	8.29336	8.1886	8.26438	7.84552	7.50725	7.79486	8.27336	8.10235	7.30174	7.08741	6.9951	8.04407	7.31131	7.50634	6.86591	7.25292	6.9507	7.88809	7.91694	7.78904	6.49778	6.72317	6.61577	8.51856	8.64533	8.31804	7.53966	6.59657	6.7858	8.06891	8.37486
LesAffx.2072.1.S1_at	LesAffx.2072.1	0.0015012	0.0296688	11.6665	11.6207	11.7121	11.6724	11.6702	11.7355	11.7716	11.7495	11.8435	11.7975	11.8534	11.8827	11.734	11.9708	11.8711	11.849	11.6247	11.8075	11.887	11.8947	11.6016	11.5289	11.8042	11.6172	11.6754	11.2598	12.0899	11.8433	11.5846	11.4992	11.6256	11.7256	11.9119	11.7111	11.625	11.3126	11.6709	11.8261	12.346	12.275	12.0148	12.1502	11.7042	11.7828	12.0206	12.1087
LesAffx.20849.1.S1_at	LesAffx.20849.1	0.000661373	0.0148895	8.59644	8.6231	8.6351	8.29229	8.68854	8.73147	8.41771	8.57423	8.57595	8.66416	8.68199	8.82442	8.76515	8.8884	8.78291	8.63007	8.90876	8.81338	8.57559	8.94463	8.78788	8.66458	9.12956	8.63947	8.98817	9.19365	8.24931	8.21925	8.57337	8.68677	8.77904	8.80758	8.32418	8.54493	8.45054	8.6892	8.62787	8.5206	7.9402	8.15138	8.41225	7.94564	8.55257	8.59588	8.19328	8.44262
LesAffx.21585.1.S1_at	LesAffx.21585.1	0.000309825	0.00776261	9.90585	10.1007	10.1022	9.80956	10.2424	10.2638	10.3858	10.6129	10.3426	10.147	10.2924	10.381	8.22	8.47052	8.42702	7.88639	8.86265	8.41771	8.01592	8.64928	9.34046	8.68816	9.46788	7.70335	7.61052	7.9157	6.97727	7.03074	7.53201	7.599	7.49272	7.44338	7.22188	7.28312	7.21533	7.73403	8.00328	7.18433	6.6783	6.2957	6.88256	6.91805	7.89009	7.66979	7.04585	7.33291
LesAffx.21820.1.S1_at	LesAffx.21820.1	0.00104135	0.02186	6.76074	6.17958	6.18618	6.70114	7.06543	6.67015	6.97251	5.97776	7.1399	6.56731	6.95004	6.85246	8.25214	8.16222	8.30654	8.82343	8.25615	8.14445	8.48222	8.11464	7.86303	8.28864	8.06152	8.90793	8.94282	8.61392	9.43509	9.46065	9.59759	8.6647	9.75888	8.94684	9.28616	8.91368	9.07164	8.96663	9.70404	9.15735	8.85305	8.80289	8.64401	8.77257	9.83522	9.28731	8.94042	8.83607
LesAffx.22100.1.S1_at	LesAffx.22100.1	6.58631e-05	0.00199828	7.28156	6.78021	6.19367	6.09738	6.26874	7.08107	6.21778	5.8108	6.26748	6.30734	6.89793	7.05996	7.58054	7.78772	7.56585	7.89627	7.91478	8.09206	7.8225	7.61018	7.63793	7.86411	7.92304	7.77974	7.92114	7.67571	8.29666	8.17478	8.12171	8.06501	7.97829	7.80068	8.39496	8.21534	8.57361	7.34679	7.46207	7.75803	8.56599	8.73533	8.47005	7.76414	7.0372	6.99098	8.13121	8.265
LesAffx.22491.2.A1_at	LesAffx.22491.2	0	0	6.587	6.17305	6.17709	6.97496	6.09066	6.66869	6.45712	6.04368	6.53237	7.27485	7.10454	7.33148	8.70514	9.15718	8.5492	9.32275	8.63232	9.14693	8.95791	8.61074	7.7539	8.99697	8.69103	8.83197	8.60684	7.83866	9.81149	9.36782	8.69138	8.75947	8.23648	8.54479	9.50797	9.52804	9.13712	7.92366	8.26431	8.96161	10.5042	10.7714	9.99847	9.56044	7.37972	7.28475	9.90321	9.86157
LesAffx.22812.2.S1_at	LesAffx.22812.2	0	0	6.50188	6.09956	7.49136	8.74064	8.0282	8.32972	7.80909	5.96498	8.32177	7.48269	7.54738	8.83441	9.85914	9.66608	9.95	10.5203	10.6373	11.3177	10.8299	9.7356	10.4332	10.8452	10.5667	11.1194	11.3756	11.7687	11.278	11.5723	11.81	11.7379	12.0355	11.4991	11.562	11.3253	11.6655	11.7756	11.7109	11.6163	10.9106	11.5622	11.3587	11.5093	11.9968	11.3545	11.4589	11.2459
LesAffx.22813.1.S1_at	LesAffx.22813.1	0.000293612	0.00740418	8.9096	8.36599	8.24433	8.72506	8.13804	8.38524	8.62393	8.13514	8.52902	8.75306	8.82983	9.06369	8.98566	9.04399	8.4629	9.11903	8.7193	9.31111	8.83588	8.12505	7.6967	8.90282	7.98589	8.58837	8.60346	7.86748	8.63399	8.73627	8.10901	8.4707	7.39329	8.05251	9.50404	9.24324	8.04478	8.26675	7.77295	8.96597	10.1391	9.95729	9.34968	8.47824	7.00058	7.6227	9.51713	9.52792
LesAffx.24042.1.S1_at	LesAffx.24042.1	0	0	4.8039	5.18522	5.44184	5.31755	4.73776	4.92181	4.90243	5.2545	5.26529	5.21314	4.95642	5.27683	5.6607	5.71671	5.38909	6.44805	5.52261	6.42966	5.77241	5.3614	5.66531	5.83819	6.02471	6.06323	5.79049	5.39881	7.96082	7.21494	7.60232	6.51631	6.34069	5.89357	7.76635	7.70657	7.89191	5.54295	5.92434	6.8661	8.9574	9.03216	8.50946	7.66627	5.96781	5.42982	8.48982	8.56328
LesAffx.24520.1.S1_at	LesAffx.24520.1	0.00120711	0.024608	5.56714	5.71271	5.3441	5.89834	5.91162	5.87161	6.38192	6.38192	5.6582	6.62716	6.2408	5.92765	5.57958	5.31411	5.21508	5.26757	5.54666	5.36596	4.96622	5.36523	5.28175	5.49654	5.48908	5.12814	5.42918	5.68286	4.73038	4.63421	4.96564	5.28334	5.15161	5.30105	4.85406	4.9657	4.81552	5.41917	5.0511	4.90709	5.021	4.89289	5.02225	4.85736	4.83698	5.20853	5.1081	5.01906
LesAffx.24637.1.S1_at	LesAffx.24637.1	0.00113982	0.0234206	5.93202	6.13161	6.81067	5.77082	6.12433	6.00697	5.83644	6.8196	6.88444	6.23442	6.1616	5.91026	5.82823	6.12985	5.7229	6.67177	7.4429	7.94596	6.01435	6.66221	8.56873	6.76312	7.03708	5.50509	5.92854	6.45861	5.2823	6.13413	5.93829	6.3631	6.13048	6.41471	6.20597	6.33798	6.23202	5.92559	5.92604	5.63744	5.44261	6.30536	5.98539	5.39233	6.30404	6.3176	6.45215	6.0536
LesAffx.25303.1.S1_at	LesAffx.25303.1	0.00202644	0.037835	6.18913	6.22851	5.49338	5.46075	5.91143	5.72556	5.34973	5.38857	5.43542	5.19313	5.83991	5.47945	5.55316	5.92943	5.58199	6.39602	5.3435	5.75287	5.68228	5.48085	5.52166	5.33942	5.34041	5.52084	5.69508	5.55448	6.42559	6.01377	5.59077	5.87419	5.50797	5.77618	6.42652	6.44094	5.82194	5.60377	5.84015	6.04835	6.99924	6.88223	6.6515	6.57876	5.53093	5.88933	6.60722	6.47915
LesAffx.25827.1.S1_at	LesAffx.25827.1	0.000124693	0.00352178	8.01854	7.63141	7.92354	7.98083	7.68596	7.86368	7.74486	7.79632	7.96787	7.70203	7.7246	7.85956	8.20392	8.06105	7.99671	8.36773	7.97116	7.96942	8.26072	8.03312	8.72982	7.90406	8.18674	7.86149	7.84678	7.71987	8.47644	8.57234	8.34787	8.00383	8.13949	7.69826	8.48547	8.33783	8.44613	7.64034	8.27277	8.04283	8.9229	8.82879	8.20881	8.51175	8.34172	8.0092	8.45613	8.38527
LesAffx.26054.1.S1_at	LesAffx.26054.1	0.00204897	0.0380726	5.24008	5.34833	5.5072	5.43046	5.44852	4.97199	5.2125	5.24628	5.62094	5.56208	5.55405	4.83124	6.37943	5.546	5.83593	7.27212	5.98109	6.17332	6.38761	5.58371	7.10173	6.148	5.98636	6.2655	5.9837	6.11454	8.50861	7.23097	6.63789	6.38037	7.23169	6.92834	6.81817	6.69802	7.11369	5.69741	5.61368	6.45186	7.02561	7.7956	6.49101	6.92995	5.84714	5.75145	6.53637	6.38451
LesAffx.269.2.S1_at	LesAffx.269.2	1.43647e-05	0.000572158	9.81903	9.5502	9.63689	10.005	9.61346	9.624	10.195	9.70717	9.50904	9.85865	9.89306	9.75745	10.0101	10.1536	9.9795	10.4121	9.87627	9.97673	10.2987	9.92277	9.83512	9.9827	9.89977	10.447	10.2923	10.1137	10.9108	10.8393	10.5687	10.6023	10.6552	9.93875	10.4686	10.1898	10.762	10.0964	10.332	10.1154	11.1911	10.8661	10.6999	11.0098	10.2077	10.2487	10.3844	10.4797
LesAffx.2889.3.S1_at	LesAffx.2889.3	2.3067e-05	0.000861353	9.95606	9.79352	9.96263	9.72819	9.55114	9.54201	9.81645	9.56581	9.52274	9.74618	9.63935	9.58336	10.0219	9.93098	10.1345	10.3427	9.48401	9.94374	10.0022	9.91766	9.65527	9.46907	9.91366	9.90808	10.0579	9.6748	10.926	10.5634	10.2971	9.8569	10.4251	10.2246	10.644	10.255	10.5395	9.8167	10.0124	10.2858	11.0022	10.6451	10.5993	10.8096	10.2912	10.3743	10.7356	10.6027
LesAffx.2889.4.S1_at	LesAffx.2889.4	2.05636e-05	0.00077911	9.34004	9.03155	9.44379	9.23261	8.84092	8.92768	9.10687	8.90574	8.96582	8.97628	8.89662	8.86009	9.63531	9.42289	9.52173	9.94975	9.03182	9.3004	9.63909	9.48255	9.11224	9.27354	9.20027	9.64066	9.50647	9.03464	10.6143	10.1493	9.95159	9.39201	9.87674	9.59662	10.366	9.91981	9.94818	9.17856	9.56899	9.85005	10.6672	10.3882	10.2777	10.3453	9.83585	9.84716	10.2259	10.1436
LesAffx.294.1.S1_at	LesAffx.294.1	0.000161588	0.00438831	7.47458	7.02229	5.74899	6.48548	6.18521	8.25993	6.06413	5.85965	5.9215	5.76654	5.54557	5.54273	7.59861	7.41242	7.5507	8.27431	6.11932	8.1702	6.28359	5.3899	6.08716	8.10729	5.67462	5.92838	6.58591	5.60683	9.23117	7.66521	6.2856	8.13813	5.40563	7.87401	6.73871	8.63063	5.46476	5.70032	6.28729	6.31518	8.49266	9.12947	9.59285	7.38369	5.34557	5.73916	6.18121	5.43428
LesAffx.29801.1.S1_at	LesAffx.29801.1	0.000147223	0.00405491	7.58718	7.1975	7.60488	8.34306	7.43148	7.9994	8.07917	7.17365	7.49831	7.93505	8.15721	8.80664	7.46722	7.09374	7.30999	7.39289	6.70805	7.21421	7.12327	7.50469	6.30365	7.2444	6.87796	7.35889	6.93191	7.35901	7.29111	7.34048	7.19487	6.88594	6.96994	6.59115	7.21976	6.81339	7.87777	6.35823	6.61615	6.71209	8.24957	7.85713	7.16549	7.80146	6.77302	6.8446	6.80209	6.91609
LesAffx.3002.1.S1_at	LesAffx.3002.1	0.000185668	0.0049218	4.5675	4.39647	4.54411	4.86429	4.54924	4.52499	4.68898	4.22497	4.69102	5.29052	5.63229	5.37038	5.75573	6.19707	5.65611	7.39399	6.47982	7.09212	6.646	6.13568	5.71018	6.63667	5.87969	6.24014	7.12164	5.53948	6.66857	6.61903	6.11045	6.60778	5.90768	6.06427	7.207	6.74593	6.08167	6.12738	6.18526	6.45364	7.37751	7.78963	6.89895	6.61864	4.65717	5.24073	7.07439	7.08511
LesAffx.3059.1.S1_at	LesAffx.3059.1	0	0	5.17366	4.80046	4.81617	4.94069	4.727	4.9298	5.17276	5.0323	4.83546	4.97197	4.88254	4.85468	4.86162	4.75736	4.77192	6.5566	5.60704	5.46063	5.63722	5.59667	7.3578	6.04434	7.08726	5.88361	5.60925	5.3704	8.28667	7.99214	8.07787	6.66477	8.24386	5.63897	7.46039	7.24295	8.58296	5.71663	5.88356	6.41078	8.82048	8.0112	7.60117	7.89462	5.95718	5.33697	7.90409	7.1553
LesAffx.3081.1.S1_at	LesAffx.3081.1	0	0	11.8124	11.6401	11.2023	11.7976	11.6888	11.9475	11.7546	11.194	11.1938	11.5848	12.0315	12.1149	10.5547	10.8334	10.4596	11.1917	10.9732	11.0234	10.7051	10.6251	10.4309	11.1174	10.657	10.7207	10.9524	10.5253	11.2641	11.0784	10.9061	10.8232	10.7151	10.6253	11.2716	11.2617	11.1425	10.5285	10.4355	10.7196	11.7981	11.7072	11.6557	11.104	10.3359	10.4566	11.4829	11.7356
LesAffx.30832.1.S1_at	LesAffx.30832.1	0	0	7.60134	5.82328	5.74348	9.91853	9.83226	9.28184	5.3882	6.08471	9.01167	6.04363	5.47753	5.59192	4.61525	4.65434	4.47981	4.69848	4.51764	4.54789	4.67918	4.39101	4.67117	4.77687	4.28196	4.37801	4.48862	4.24961	4.50447	4.36559	4.35602	4.49681	4.54378	4.48439	4.44039	4.62229	4.34525	4.867	4.30505	4.36978	4.70927	4.62014	4.43333	4.4631	4.48677	4.9174	4.44932	4.40606
LesAffx.31185.1.S1_at	LesAffx.31185.1	0.00109273	0.022754	11.6992	11.8336	11.5182	11.3404	11.5047	11.7022	11.6982	11.1713	11.1873	11.5271	11.5381	11.684	11.1057	11.3406	11.2664	11.2717	11.8647	11.2261	11.3232	11.3258	12.2116	11.7556	12.1171	10.3117	10.0892	10.7262	9.29831	9.45684	9.77418	10.5998	10.2177	9.92064	9.58252	9.61456	9.9262	10.3597	10.1642	9.58798	9.21798	9.57828	9.78945	9.0075	9.50174	9.66039	9.48763	9.45443
LesAffx.3163.1.S1_at	LesAffx.3163.1	7.15256e-06	0.000319275	11.5306	11.8798	10.7646	9.85447	10.496	10.7598	10.3123	9.77894	10.3939	9.79325	10.3556	10.05	10.1284	10.1783	9.77155	10.1611	10.0808	10.6172	9.72879	9.88596	9.55773	10.1267	9.59632	9.62636	9.80025	9.22502	9.92323	9.94292	9.53614	9.84207	9.6239	9.54142	10.2114	10.176	9.65867	9.50767	9.11687	9.96135	10.5261	10.8888	10.6592	9.84563	8.68098	9.05471	10.2286	10.4384
LesAffx.31716.1.S1_at	LesAffx.31716.1	0	0	5.7922	6.0172	6.02896	5.74739	5.9618	6.21168	5.73206	6.2673	5.79674	5.8872	5.66284	5.73723	5.6607	5.64064	5.60611	5.35244	5.93886	5.60122	5.38816	5.54303	6.59179	5.50575	6.75153	5.97806	6.17347	6.22149	6.68053	7.09207	6.63271	5.68453	6.53384	6.38002	6.4353	5.79653	6.93592	6.45617	6.63131	6.34179	5.57571	5.65425	5.47003	6.63548	6.72744	5.86301	6.7702	5.91525
LesAffx.31716.2.S1_at	LesAffx.31716.2	5.90086e-06	0.000268023	5.09329	5.52026	5.22791	5.05416	5.41778	5.25691	4.87576	5.70669	5.05958	5.05849	4.89415	5.32274	5.20617	4.71258	5.29639	5.02328	5.29543	4.71258	4.91486	4.99301	6.22147	5.06207	6.07528	5.41678	5.36647	5.67274	5.88948	6.54824	5.95522	5.21856	6.31801	5.86775	6.00326	5.3151	6.11049	5.81961	6.27383	5.64143	4.88994	5.02446	4.79101	5.72509	6.46712	5.07102	5.96225	5.03187
LesAffx.31836.1.S1_at	LesAffx.31836.1	0.0018996	0.0358111	5.33932	5.54324	5.30921	5.53836	5.45227	5.7902	5.88687	5.87556	5.64014	5.71939	5.63319	5.7386	5.86589	5.82284	6.19022	5.61884	5.28972	5.27867	5.88957	6.04533	5.85308	5.3383	5.70855	5.88361	6.14075	6.40351	6.01833	6.06909	5.54249	5.30923	6.05245	5.84882	6.58031	6.04669	6.38599	6.32339	6.38657	6.6367	6.20432	5.62361	5.93316	6.09114	6.47964	5.87375	6.04612	6.18038
LesAffx.3253.1.S1_at	LesAffx.3253.1	0.000196874	0.00518346	11.1616	11.141	10.3696	9.34205	10.3706	9.38781	8.95624	8.15188	7.80662	8.28297	8.20388	7.78831	8.08241	7.85596	7.91085	7.49896	7.72388	6.8199	7.74955	7.76278	7.12916	7.46741	6.96775	6.63034	7.07404	6.70476	6.2602	6.69503	6.3237	6.77801	6.65309	6.4152	6.54641	6.5947	6.13346	6.78026	6.90538	6.49612	6.48165	6.39835	6.8042	6.37374	6.52363	6.73458	6.35055	6.56009
LesAffx.3253.2.S1_at	LesAffx.3253.2	0	0	7.66062	7.7234	7.1126	6.25883	6.65149	6.39601	6.45843	6.06117	5.66224	5.93102	5.93845	5.95187	5.47489	5.61452	5.56648	5.19007	5.12641	5.33782	5.53077	5.25516	5.22599	5.36445	5.23355	5.04505	5.13079	5.01739	4.89104	4.83639	4.91046	4.98605	5.10562	5.07814	5.11456	4.85294	4.90776	5.10267	4.76922	5.08519	5.17105	5.02164	5.11743	4.94789	4.95207	5.0221	5.06055	5.1493
LesAffx.33402.1.A1_at	LesAffx.33402.1	0.000487924	0.0114148	7.86636	7.56028	7.30261	7.59921	7.5583	7.80865	7.46586	7.28636	7.35642	7.7596	7.80033	7.7779	7.72999	7.76574	7.45339	7.71346	7.38957	7.48079	7.46882	7.23641	7.02556	7.68962	7.31798	7.59161	7.57238	7.18044	7.76075	7.54471	7.11691	7.5241	7.20807	7.39032	7.6019	7.65184	7.24643	7.01721	6.78902	7.50045	8.1913	8.15575	7.84401	7.78704	6.96136	7.29492	7.61249	7.60757
LesAffx.344.12.S1_at	LesAffx.344.12	4.63724e-05	0.00153266	7.24974	7.27958	7.06024	7.31922	7.2718	7.43647	7.70608	7.47494	7.35205	7.43432	7.55794	7.66335	7.71794	7.7525	7.69944	7.89375	7.33521	7.6643	7.66231	7.54023	7.19323	7.21583	7.25851	7.42568	7.37221	7.13166	7.66468	7.42597	7.6881	7.12954	7.5585	7.53013	7.77777	7.49707	7.47997	7.05891	7.2257	7.17275	7.93008	7.58827	7.82504	7.65715	7.38727	7.63276	7.31506	7.78705
LesAffx.344.3.S1_at	LesAffx.344.3	0	0	9.4579	8.76167	8.18317	8.79335	8.26288	8.97056	9.10598	7.48164	8.09408	8.87581	9.19975	9.57266	8.49318	8.14582	7.82588	9.16968	8.73116	8.85217	8.49338	7.76599	8.66601	9.37159	8.84978	8.22507	7.73235	7.46077	9.94042	9.08003	8.95156	7.8302	8.43223	6.42275	9.37065	9.16707	9.26511	7.26255	7.65273	7.56028	10.4417	9.94629	9.41533	9.37919	7.93733	8.35601	9.75176	9.8149
LesAffx.3502.1.S1_at	LesAffx.3502.1	0.000562489	0.0128119	7.55928	7.30991	7.58718	7.08094	7.09762	7.25488	6.61094	7.00233	7.00024	6.66087	6.67655	6.8345	7.3744	7.1484	7.80018	8.01285	7.63657	6.6297	8.15141	7.71535	8.48969	7.23045	8.09229	7.44258	7.25814	7.2491	8.96823	8.46616	8.41343	7.47545	8.86435	7.71582	8.19558	7.22488	8.86795	7.11081	7.9493	7.65328	7.36625	7.49889	6.87233	8.27627	8.338	7.31698	7.59882	7.18
LesAffx.3554.1.A1_at	LesAffx.3554.1	0	0	5.42038	5.16618	5.23363	5.06764	5.09127	5.2801	5.30308	5.32628	5.16602	5.46318	5.14846	5.30879	5.42991	5.46441	5.33097	5.71559	5.62761	6.03598	5.30421	5.47068	5.17494	5.42921	5.09069	5.22238	5.65575	5.00991	6.10461	5.49936	5.36514	5.45859	5.05198	5.64515	6.10242	6.5719	5.70938	5.45014	5.18559	5.94782	8.53994	8.74544	8.64248	5.14403	4.93227	5.21367	7.84401	8.16831
LesAffx.3635.1.S1_at	LesAffx.3635.1	2.98023e-07	1.8371e-05	6.05872	5.90189	4.81458	5.13194	5.27926	4.93981	4.96315	4.91841	4.5159	5.09526	5.05511	5.27173	4.33217	4.82187	4.37605	4.59198	4.62036	5.03866	4.59743	4.46266	4.76628	5.0355	4.98695	4.62514	4.54858	4.22467	4.73937	4.63852	4.68313	4.42584	4.42359	4.63226	4.81505	5.12317	4.90267	4.87777	4.54514	4.30981	6.25454	5.92313	5.83871	5.04024	4.38183	4.41966	5.52227	6.15532
LesAffx.3635.2.A1_at	LesAffx.3635.2	0	0	7.50995	6.82818	5.86236	6.30347	6.38185	6.41255	6.23354	5.86792	5.78462	6.33826	6.29457	6.50396	5.45436	5.80688	5.51934	6.25437	6.27367	6.698	5.89243	5.39332	5.94864	6.69382	5.68389	5.97839	5.95867	4.93681	6.69551	6.59333	6.20052	5.79515	5.73009	5.64171	6.61033	7.18388	6.53481	5.3498	5.7353	5.95166	8.05734	7.79775	7.56984	6.51473	4.89541	5.36218	7.70545	7.49801
LesAffx.36712.1.S1_at	LesAffx.36712.1	0.000514805	0.0119358	10.9868	10.1543	9.43853	9.40807	8.73107	9.48507	8.66494	7.81945	8.0669	9.09888	9.59324	9.64307	7.92625	8.08194	7.73372	8.61838	8.48801	7.95343	8.42807	7.48059	8.0228	8.20221	8.19208	7.67411	7.54929	7.33458	7.802	7.49463	7.2361	7.46875	7.59211	6.44754	7.53878	7.38211	7.45869	6.17853	7.16714	6.45018	7.78508	7.77672	7.51332	7.23676	6.25226	6.46134	7.29392	7.48026
LesAffx.3698.3.S1_at	LesAffx.3698.3	2.60472e-05	0.000936615	11.239	11.0254	10.7454	11.0779	11.0676	11.2638	10.8433	10.6931	10.7987	10.8812	11.1546	11.0811	10.5652	10.55	10.5776	10.8885	10.632	10.7423	10.5396	10.3409	10.29	10.767	10.5099	10.3734	10.3995	10.0925	10.7407	10.6194	10.1722	10.1277	10.3913	10.4065	10.7183	10.5791	10.5665	10.2491	10.1428	10.5729	11.0439	11.1738	11.0468	10.7545	10.293	10.3489	10.9113	11.0082
LesAffx.37337.1.S1_at	LesAffx.37337.1	0	0	7.79049	7.59333	7.36691	7.70554	7.77479	7.8803	7.70806	7.24663	7.81779	7.7694	8.02689	8.2063	6.88302	7.24309	7.16075	7.90217	7.96413	8.25411	7.0956	7.17111	8.04287	8.0114	7.95659	7.19714	7.4072	7.0607	8.00777	7.7295	8.02625	6.98369	6.75543	7.25281	8.03429	8.49609	8.10576	6.97032	6.68122	7.3856	9.858	9.45581	8.77565	7.19137	6.68199	6.98903	8.43811	9.15377
LesAffx.37344.1.S1_at	LesAffx.37344.1	1.54972e-06	8.13289e-05	8.53812	8.66153	8.55976	8.92903	9.4383	9.17845	9.35706	9.12578	9.39702	9.45738	9.72616	9.64709	8.51042	8.6688	8.59988	8.57781	7.93389	8.55464	8.63614	8.72117	6.72126	7.97678	7.23582	8.32376	8.24985	7.85502	7.9359	7.47602	7.17591	7.73867	7.14873	8.68492	8.40918	8.35541	7.44168	7.05489	6.24076	7.65225	8.33326	9.06116	8.12584	7.83292	6.56635	6.9458	8.38618	8.49281
LesAffx.37344.2.S1_at	LesAffx.37344.2	2.52128e-05	0.000910826	10.468	10.5182	10.3809	11.0376	11.1653	11.1467	11.1788	10.9192	11.2249	11.4631	11.6388	11.4415	10.4414	10.3556	10.2591	10.4729	9.91574	10.2274	10.402	10.4455	8.6362	9.79612	8.94903	10.3022	9.97384	9.38041	9.81071	9.59176	9.01253	9.64918	8.94	10.2799	10.5231	10.367	9.29977	9.15793	8.34158	9.78567	10.3524	10.8815	10.2182	9.91432	8.52684	8.89874	10.4614	10.5158
LesAffx.37563.1.S1_at	LesAffx.37563.1	5.24521e-06	0.000241062	3.82718	3.85874	4.02572	3.93927	3.60594	3.93361	3.78249	3.79163	3.856	3.80505	3.83566	3.68916	4.0843	3.90309	3.89915	3.80737	3.91997	3.83324	3.87198	3.85998	4.02221	4.17287	3.90783	3.85705	4.17848	3.79507	4.13255	3.88324	3.90066	3.75527	3.72959	3.94547	4.27412	3.77478	4.24191	3.93739	3.9239	4.08473	5.605	6.50642	4.61513	4.03566	4.1136	3.99106	5.06408	5.31819
LesAffx.37588.1.S1_at	LesAffx.37588.1	2.22325e-05	0.000838253	9.19821	9.20351	9.49122	8.48651	9.17879	9.16137	8.93067	9.58411	9.00476	8.71503	8.82146	8.80627	6.32765	5.93553	6.35746	5.96605	6.32464	5.52384	6.67002	6.57873	7.68464	5.63705	7.54911	5.2831	5.18271	5.63424	5.74316	5.83094	5.7747	5.09952	6.43404	5.83741	5.40022	5.28761	6.23917	5.94923	6.33281	5.71246	5.03731	5.13152	4.67356	5.6654	6.72357	6.049	5.8017	5.5625
LesAffx.37853.1.S1_at	LesAffx.37853.1	0.00234115	0.0422877	8.29059	8.41885	8.56055	8.69578	8.77935	9.12605	8.68537	8.89174	8.85913	8.55749	8.93899	8.9644	8.50881	8.67111	8.32948	8.3292	8.78825	8.82373	8.33778	8.76743	8.53014	8.66772	8.64301	8.68674	8.8638	9.13779	8.28062	8.43884	8.38686	8.98665	8.57317	8.55365	8.50326	8.70488	8.53662	8.93563	8.78824	8.59544	8.46041	8.69213	8.61658	7.83304	8.33208	8.57526	8.19575	8.52562
LesAffx.38395.1.S1_at	LesAffx.38395.1	0.000101805	0.00296149	6.86071	6.87514	6.71585	6.78566	6.9011	6.87684	6.88244	6.65442	6.79123	6.56771	6.61867	6.76054	6.79765	7.15475	7.15365	7.50513	6.72218	7.25795	7.49143	7.36205	6.77132	7.04217	7.0761	6.94924	7.22392	6.98492	7.73039	7.08233	7.24841	7.09458	7.51213	7.22621	7.18632	7.36915	7.70942	6.75575	6.62255	7.07742	7.85584	8.09271	7.47079	7.61148	6.75557	6.68139	7.39832	7.36827
LesAffx.38821.1.S1_at	LesAffx.38821.1	4.95911e-05	0.00159163	5.48987	5.39621	5.52302	5.5438	5.2727	5.2529	6.03913	5.30996	5.53493	5.19404	5.37859	5.30879	5.53177	5.39855	5.40511	6.11629	6.05878	6.30986	5.66896	5.286	6.2703	6.75403	6.94726	6.36117	7.20622	7.20849	7.77045	6.91609	7.50427	7.20956	7.23808	6.56245	6.80684	6.55464	7.73196	6.58323	6.52666	6.60691	8.04721	7.58456	6.9898	7.54303	6.42151	6.22476	7.35427	7.10059
LesAffx.42451.1.S1_at	LesAffx.42451.1	0.00023669	0.00612791	5.73101	5.03355	5.13192	5.64644	5.55573	5.8963	6.06623	5.61539	5.61886	5.73723	6.37204	6.32211	5.28095	5.75524	5.6387	5.6779	5.12958	5.48263	5.715	5.39884	4.43265	5.03672	5.22371	4.97624	4.82241	4.75035	5.00878	5.10189	4.54527	4.86886	4.88003	4.8976	5.27044	4.81463	4.58703	4.51007	4.36473	4.63163	5.70077	5.32541	5.23551	4.95436	4.50199	4.41423	5.14281	5.3006
LesAffx.42534.1.S1_at	LesAffx.42534.1	0.00158179	0.0307913	6.03871	6.0172	5.8445	5.9887	6.11413	5.84687	5.64321	5.82915	5.62582	6.19368	6.07435	6.32662	6.8472	6.98518	6.98539	6.87406	6.68943	6.88963	6.89088	6.76279	5.52368	6.84066	6.19064	7.20493	7.43525	6.74342	7.55883	7.04253	6.75476	7.33839	6.2687	7.20652	7.60071	7.64115	6.81319	7.35012	6.58852	7.70473	8.34235	8.1807	8.29783	7.47466	6.71549	6.51398	8.16703	8.07237
LesAffx.43420.1.S1_at	LesAffx.43420.1	8.34465e-07	4.59666e-05	7.43299	7.5817	7.60056	7.62668	7.51444	7.6271	7.35853	7.29761	7.34118	7.25377	7.54201	7.64602	8.33036	8.30071	8.12796	8.28816	8.41905	8.20234	8.14034	8.34228	8.35353	8.43352	8.33487	8.80443	8.91445	9.04333	8.46017	8.41067	8.52246	9.03	8.42072	8.41826	8.3348	8.62007	8.44107	8.92182	8.81561	8.6271	8.15947	8.25424	8.52107	8.15733	8.38757	8.78112	8.2418	8.22024
LesAffx.43628.1.S1_at	LesAffx.43628.1	0.000279665	0.00707543	13.6692	13.8043	13.6687	13.8232	13.6621	13.8756	13.574	13.4672	13.6037	13.725	13.6213	13.8465	13.7757	13.7754	13.566	13.4537	13.7425	13.923	13.4346	13.5352	13.4273	13.8079	13.6114	12.0483	12.4779	12.5655	11.2808	10.8508	10.8557	12.3102	11.6971	12.1596	12.0373	12.2544	11.6781	12.5104	11.329	12.5843	11.8088	12.5527	12.838	11.7553	10.8319	12.4716	11.9977	12.7191
LesAffx.43641.1.S1_at	LesAffx.43641.1	9.20296e-05	0.00270755	7.55237	7.49995	7.47466	7.46032	7.44649	7.66089	7.38128	7.18288	7.35067	7.14997	7.55193	7.67502	7.99086	7.70031	7.75791	7.6867	7.74512	7.65677	7.94277	7.83611	8.03596	7.24567	7.78944	8.35238	8.45399	8.62206	8.26832	8.32093	8.43486	8.65439	8.45491	8.19025	8.43306	8.38538	8.30052	8.49255	8.67955	8.4341	7.9788	7.91979	8.14262	8.36369	8.51299	8.53468	8.28905	8.0439
LesAffx.44563.1.A1_at	LesAffx.44563.1	0.000123739	0.0035076	9.98712	9.8978	9.99017	10.1372	9.94009	9.95137	10.2272	10.0651	10.3031	10.4035	10.3022	10.3968	11.5917	11.4216	11.5496	11.8691	11.0324	11.3691	11.7895	11.4431	10.9401	11.341	10.8822	11.1471	10.9085	10.1841	11.6374	11.3359	10.9888	10.7758	11.0669	10.775	11.4721	11.188	11.1335	10.1315	10.7015	10.8786	11.8732	11.8951	11.3526	11.5723	10.4889	10.9032	11.3923	11.3816
LesAffx.45439.1.S1_at	LesAffx.45439.1	1.96695e-05	0.000752578	6.34192	6.47064	6.24596	6.26776	6.80727	6.58321	6.3826	6.61342	6.65967	6.68957	6.48715	6.32407	6.08209	5.8745	6.03661	5.67192	5.97237	5.59489	5.62082	6.1464	5.7529	5.80169	6.19224	6.45504	6.66852	6.90088	5.91677	5.75906	6.13116	6.37481	6.28651	6.67035	6.12514	6.21593	6.07377	6.80269	6.11139	6.35971	5.54024	5.74362	6.08768	5.56342	6.11818	6.19669	6.11012	6.07171
LesAffx.45975.1.S1_at	LesAffx.45975.1	1.07288e-06	5.82733e-05	7.44146	7.62435	7.94257	7.67915	8.04623	7.82801	8.20355	8.30664	8.39151	8.04785	8.24825	8.26507	7.39114	6.85933	7.24618	7.64696	7.53116	7.40933	7.37393	7.29908	7.69837	7.48069	7.60593	7.47704	7.42107	7.54849	7.85735	7.65068	7.61971	7.29332	7.28409	7.39119	8.00855	7.72421	7.61385	7.35507	7.20152	7.34292	8.34876	8.54083	7.80715	7.08016	7.23948	7.02653	8.19634	8.33503
LesAffx.46547.1.S1_at	LesAffx.46547.1	0.0014748	0.0292213	8.6134	8.38545	8.50314	8.399	8.55681	8.4696	8.477	8.33787	8.57514	8.25034	8.47516	8.46199	8.6553	8.91765	8.43416	8.5184	8.74106	8.71042	8.45567	8.59087	8.83637	8.86064	8.80275	9.18623	9.2013	9.45457	8.61539	8.69046	8.83687	9.09208	8.86112	8.94279	8.82781	9.23325	8.96386	9.37049	9.14945	9.09676	8.64413	8.85882	9.12416	8.72178	9.00628	9.09423	8.89277	8.91635
LesAffx.46815.1.S1_at	LesAffx.46815.1	0.00222647	0.0407854	9.9865	9.79887	10.2503	9.18009	9.9281	9.63074	9.62015	10.0234	9.78671	9.41234	9.63073	9.42165	7.98722	7.85958	8.17701	7.88699	7.74678	7.46198	7.86932	8.20941	8.61007	7.8375	8.75412	7.54319	7.87258	7.77114	7.51791	7.51883	7.8006	7.02566	8.12279	8.15087	7.67895	7.61739	7.88448	7.06458	7.30512	7.11096	6.56555	6.69686	6.47824	6.89492	7.5956	6.83231	7.3642	7.17127
LesAffx.46815.2.S1_at	LesAffx.46815.2	0.000968933	0.0206184	11.7954	11.7614	12.1054	11.4675	11.8913	11.658	11.6019	11.8497	11.6613	11.5046	11.5981	11.422	10.0866	9.66433	10.1003	10.0276	9.72801	9.18844	9.94364	10.0792	10.552	9.74923	10.4678	9.43891	9.39013	9.33422	9.55935	9.44758	9.62187	9.03114	9.78418	9.76629	9.56528	9.54783	9.54539	9.13047	9.20939	9.26006	8.32262	8.6519	8.40163	9.00188	9.60234	8.63028	9.36797	9.10172
LesAffx.46942.1.S1_at	LesAffx.46942.1	0.000299752	0.00753454	7.74605	8.01869	7.82982	7.88024	8.08026	8.04052	7.80717	8.00588	8.03286	8.04082	7.88915	7.99641	7.71024	7.76483	7.64182	7.55373	7.75604	7.85853	7.61506	7.63599	7.78459	7.46805	7.92229	7.5099	7.61615	7.9989	7.19426	7.3496	7.16715	7.64731	7.67045	7.64763	7.27446	7.39994	7.34854	7.90635	7.71079	7.52513	7.02561	7.37211	7.28736	7.03807	7.48518	7.63891	7.38551	7.53338
LesAffx.47399.1.S1_at	LesAffx.47399.1	1.33514e-05	0.000548681	7.50222	7.26166	7.49467	7.94479	8.12841	8.20235	7.45606	7.60684	8.09796	7.71483	7.5315	7.6976	6.84282	6.74467	7.08391	6.9972	6.76264	6.59265	6.94571	7.13717	7.21803	6.72804	7.31914	7.23175	7.27705	7.46961	7.2216	7.20092	6.99307	7.32686	7.13834	7.05318	7.20504	6.96037	6.99252	7.15792	6.99206	6.91567	7.06012	6.98982	7.05031	7.15477	7.19054	7.19701	6.91336	6.94762
LesAffx.4763.1.S1_at	LesAffx.4763.1	0.0016979	0.0325619	7.16839	7.44257	7.42665	8.83522	6.88272	7.77437	7.9747	6.94232	7.46077	7.96101	8.00991	9.44431	12.2088	11.7043	11.7719	12.4651	11.4026	11.7601	12.2826	11.7527	11.5557	12.0962	11.7506	12.1245	11.9894	11.8826	13.0313	12.5374	12.6993	12.3767	12.4733	11.9027	12.7803	12.6349	12.7296	11.6828	11.9201	12.3586	13.5099	13.3572	13.0006	12.8493	11.8757	12.1025	12.9335	12.9524
LesAffx.4779.1.S1_at	LesAffx.4779.1	0.000318229	0.00787161	11.4667	11.2627	10.8237	10.8115	10.9791	11.4387	11.1189	10.6404	10.7724	11.0673	11.4555	11.5541	11.6884	11.8474	11.5667	11.6856	11.8226	12.0835	11.7482	12.0431	11.6574	11.8579	11.571	12.0299	11.9235	11.8292	11.8873	12.0739	11.7729	12.2891	11.5577	12.2566	12.2746	12.2575	12.2307	11.5626	11.1248	11.924	12.5483	12.6747	12.3286	12.082	11.3328	11.1588	12.3288	12.2994
LesAffx.49476.1.S1_at	LesAffx.49476.1	0.00146514	0.0291789	11.3525	11.3934	11.5191	11.4379	11.5992	11.4635	11.4195	11.9411	11.7647	11.5607	11.6945	11.5496	10.8418	10.4403	10.8543	10.4127	10.7599	10.5685	10.7261	10.3063	10.808	10.72	10.8547	10.0935	10.0915	9.98738	9.59142	10.0657	10.0507	9.56192	9.78721	10.3006	10.2162	10.1779	10.0152	9.98185	9.91352	9.85207	9.35178	9.34389	9.31554	9.30788	10.1542	9.76189	9.94525	9.90763
LesAffx.49530.1.S1_at	LesAffx.49530.1	0.00020951	0.00549752	9.06967	9.17783	9.33401	9.28122	9.50356	9.28669	9.34947	9.50559	9.3271	9.33074	9.46377	9.23277	8.34869	8.16288	8.23631	8.01316	8.14091	8.00724	8.37954	8.28312	7.8873	7.9116	8.09616	9.22157	9.35489	9.20397	8.93125	9.27853	9.13909	9.21717	8.9609	9.46609	9.27314	9.49276	9.09849	9.52442	9.17525	9.29217	8.83914	8.68534	8.91128	9.01477	9.33731	9.32659	9.48152	9.32052
LesAffx.49809.1.S1_at	LesAffx.49809.1	0	0	8.16999	7.87723	8.04088	8.03394	7.7342	8.11226	8.36735	8.17682	8.09663	7.77545	8.0089	8.19649	7.23764	6.72634	6.94296	7.3837	6.50352	6.11672	7.4723	6.80514	6.65421	6.50475	7.20998	6.16323	6.03978	5.94575	7.39044	7.1211	6.63431	6.00653	6.78416	6.16555	6.95693	6.43616	6.77448	5.4067	5.89653	6.24217	7.88993	7.56054	6.99472	7.19574	6.2665	6.00373	7.26087	6.90338
LesAffx.49935.1.S1_at	LesAffx.49935.1	0	0	6.46599	6.58036	6.71015	6.6451	6.3705	6.38249	6.48217	6.64066	6.52031	6.23668	6.70765	6.28728	7.55041	7.72625	8.01769	7.24124	6.30492	7.47821	7.23138	7.71805	7.27994	7.13616	7.19562	6.9355	7.33588	6.33295	8.57549	7.90363	7.99183	6.35865	7.84494	7.06618	8.03903	7.64508	8.62951	6.98082	6.64037	7.91085	10.2204	9.83264	8.70636	9.03242	7.0875	7.29116	9.12903	9.06368
LesAffx.50687.1.S1_at	LesAffx.50687.1	0	0	8.42318	8.46922	8.3915	8.31832	8.38951	8.51456	8.5775	8.20466	8.53122	8.55907	8.71434	8.72848	8.77911	8.8816	8.55868	8.97128	8.76381	9.01645	9.21906	8.91622	8.45941	9.23375	9.03383	8.84192	9.02782	8.79592	9.43875	9.06225	8.91446	8.95508	8.89419	9.13295	9.49218	9.47776	9.1812	8.26167	7.99672	8.9097	9.88183	10.0668	9.39146	9.18217	8.28777	8.23733	9.43855	9.55358
LesAffx.51226.1.A1_at	LesAffx.51226.1	0.000120282	0.00343468	11.8031	12.395	12.1758	11.4026	11.8627	11.987	11.5325	12.0549	11.979	11.6291	11.2962	12.295	11.6774	11.9853	11.2344	11.5164	10.9564	10.9541	11.115	11.002	12.292	10.7239	12.0328	11.3501	12	11.7343	10.8344	10.5967	11.0968	11.7878	12.3574	10.9095	11.2671	10.6564	12.1879	12.1262	12.0855	12.1749	11.2743	11.5417	11.8424	11.4856	12.055	12.1013	11.8227	12.1772
LesAffx.51266.1.S1_at	LesAffx.51266.1	0.000182152	0.00484511	6.83651	6.51928	5.93828	6.80971	6.5083	6.59272	7.10212	5.76586	6.25005	6.58786	7.22522	8.18129	7.4902	7.79348	7.06154	7.53116	7.64252	7.70888	7.32752	7.09861	5.85944	7.72745	6.9043	8.02096	7.57009	7.34378	7.02302	7.36023	6.48964	7.47234	6.84924	6.09212	8.11562	7.90487	7.00883	6.52325	6.69917	7.32252	8.21743	7.96741	7.76201	7.28188	5.86	6.6701	7.46106	8.03098
LesAffx.51271.1.S1_at	LesAffx.51271.1	1.4782e-05	0.000582799	12.8648	12.9067	12.9105	12.9131	13.0128	13.0345	12.9904	12.8841	12.9306	12.912	13.0804	12.9849	13.0587	13.1432	13.0389	13.0008	13.1694	13.1054	12.7743	13.0442	13.1107	13.237	13.0786	12.7417	12.7818	13.0112	11.923	12.0493	12.2833	12.7806	12.5176	12.5651	12.3009	12.643	12.3264	12.8724	12.5681	12.7285	11.8382	12.3582	12.7003	11.8527	12.177	12.6118	12.3627	12.5781
LesAffx.51292.1.S1_at	LesAffx.51292.1	0.000566185	0.0128583	8.73313	8.72072	8.66052	8.7929	8.91934	8.9319	9.04769	8.83062	8.83875	8.97953	9.02997	8.95309	9.07928	9.38572	9.33888	9.26394	8.98224	9.29413	9.03941	9.17421	8.41872	8.98006	8.83969	8.84035	9.10998	8.63898	9.0374	8.93911	8.84209	8.70389	8.98346	9.10759	9.13363	8.9052	8.96164	8.75382	8.58357	8.85007	9.34213	9.36705	9.20655	9.17399	8.66923	8.60252	9.083	9.14647
LesAffx.51298.1.S1_at	LesAffx.51298.1	0	0	4.05895	3.96074	3.94127	4.26864	3.91865	4.11065	4.08705	3.89641	3.95313	4.06925	3.92352	4.06586	4.01414	4.1846	3.85562	4.01283	4.14683	4.22261	3.90576	3.77975	3.91331	4.03346	4.01275	4.07283	4.26455	4.1603	4.72072	4.11736	4.14535	4.29201	4.07977	4.11936	4.47447	4.44605	4.32835	4.35511	4.17931	4.25926	5.60444	5.72878	5.52568	4.07811	4.08723	4.11829	5.25128	5.42715
LesAffx.52290.1.S1_at	LesAffx.52290.1	3.59416e-05	0.00122438	6.2165	7.25291	7.1719	5.92714	5.99682	5.82153	5.82678	6.35431	6.41907	5.37196	5.30948	5.41916	10.7811	10.7876	10.9208	10.6773	10.2762	10.4214	11.0461	10.6592	10.7571	10.8212	10.9658	10.6601	10.681	10.8696	10.9497	10.5859	10.8991	10.9587	11.066	10.7272	10.7601	10.5241	10.7645	10.7085	10.9203	10.5093	10.3777	10.4811	10.3125	10.7314	10.8151	10.834	10.4917	10.2396
LesAffx.52437.1.S1_at	LesAffx.52437.1	0	0	4.2708	4.24086	4.55359	4.32787	4.50019	4.34542	4.59385	4.3788	4.44401	4.59431	4.37593	4.26627	5.29557	5.03458	5.11306	6.09133	4.64087	6.0138	5.14119	5.08317	4.55706	5.1479	4.98789	4.8089	5.28659	4.87752	6.2294	5.33376	5.06687	5.13116	5.13777	5.25215	5.49963	5.80976	5.83903	4.86395	5.19077	5.67785	7.21057	7.54279	6.96124	5.92811	4.73784	5.27526	6.46368	6.79714
LesAffx.52594.1.S1_at	LesAffx.52594.1	0	0	5.63028	5.49818	5.3232	5.59194	5.39503	5.39037	5.6146	5.35922	5.42326	5.85112	5.40169	5.64913	5.63906	5.36514	5.05535	6.85481	6.23586	6.70797	5.82204	5.50899	6.17847	6.31127	6.28415	5.87018	5.87499	5.30524	7.92399	6.99143	7.10673	5.93074	6.55834	6.01308	7.83565	7.52452	7.54669	5.64035	5.68355	6.54732	8.40282	8.61314	8.19852	7.70761	5.68292	5.55042	8.52894	8.33959
LesAffx.52595.1.S1_at	LesAffx.52595.1	0	0	7.64936	7.16306	7.32675	7.67138	7.178	7.47114	7.73321	7.10719	7.33551	7.48379	7.30826	7.40118	7.90691	7.84445	7.91178	8.4361	7.70737	7.71469	8.31514	8.04368	7.84334	7.82629	7.99162	7.76111	7.66289	7.45788	8.6689	8.33051	8.00177	7.75624	8.47181	7.69356	8.37801	8.09668	8.21295	7.11193	7.49013	7.69203	9.17799	8.98542	8.29367	8.50732	7.48257	7.31867	8.55946	8.49369
LesAffx.53591.1.S1_at	LesAffx.53591.1	9.05991e-06	0.000395327	4.46905	4.51384	4.51501	5.1387	6.51743	5.86027	4.6068	4.97039	5.60453	4.78025	4.55189	4.80315	4.49617	4.50792	4.45491	5.23824	4.78296	4.58449	4.91079	4.44095	5.16944	4.65268	4.59497	4.51895	4.32634	4.65945	5.08205	4.52104	4.48176	4.37173	4.70829	5.25893	4.32613	4.51176	4.33181	4.40956	4.71184	4.54888	4.30769	4.68416	4.36622	4.44521	4.49802	4.65492	4.4091	4.37179
LesAffx.54536.1.S1_at	LesAffx.54536.1	0.00246555	0.0441242	3.89061	3.51573	3.53112	3.70686	3.62329	3.63182	3.79419	3.77135	3.65203	3.71576	3.78377	3.88467	4.39528	4.63448	4.49686	4.69237	4.36055	4.64441	4.38452	4.23196	4.76454	4.05484	5.02244	4.64077	4.7377	4.87215	5.29739	4.95174	5.33026	4.72478	5.40258	4.63239	4.81552	4.68012	5.2164	4.97556	4.99868	4.67864	6.4179	5.59937	5.1934	5.39262	5.38814	5.19794	5.19978	5.47786
LesAffx.5533.1.S1_at	LesAffx.5533.1	2.93255e-05	0.00103064	8.08718	8.02533	7.60898	8.18934	8.17968	8.33551	8.43629	8.11548	8.1553	8.40554	8.42887	8.62867	8.64617	9.03346	8.78422	8.91563	8.23662	8.68964	8.82367	8.77576	8.26728	8.34922	8.68657	8.08846	8.69393	8.00691	8.83401	8.62411	8.12699	8.34616	8.3421	8.41207	8.78073	8.50553	8.65341	7.6521	7.69173	8.28872	9.24418	9.14798	8.76775	8.91007	7.59265	7.79024	8.75801	8.76486
LesAffx.56130.1.S1_at	LesAffx.56130.1	0	0	4.69601	4.3854	4.42395	4.63527	4.61199	4.7192	4.56275	4.51668	4.19673	4.57406	4.66272	4.42082	4.26404	4.77494	4.4187	4.59594	4.75918	4.86595	4.40289	4.4333	4.75013	4.5094	4.82355	4.30393	4.61122	4.68237	4.82881	4.68886	4.63374	4.33455	4.69901	4.50002	4.69307	4.78337	4.91689	4.67878	4.5872	4.33028	5.84317	5.79715	5.45905	4.44209	4.80118	4.63842	5.36363	5.60083
LesAffx.56389.1.S1_at	LesAffx.56389.1	1.32918e-05	0.000549137	4.8571	4.58553	4.73045	4.8679	4.77559	4.55838	4.88277	5.07527	4.74737	4.89023	5.06435	4.60544	5.33167	4.8872	4.64741	5.55433	5.05931	4.88305	5.44651	4.55415	5.28753	5.16161	5.01243	4.82566	4.58742	4.775	6.39459	5.11145	5.32834	4.96777	6.32817	4.83609	5.02511	4.92339	5.51874	4.9842	4.69554	4.69875	8.25667	7.28775	5.5836	5.18102	7.08498	9.73122	5.3789	5.69219
LesAffx.56547.2.S1_at	LesAffx.56547.2	0.000127733	0.00359457	6.53672	6.59246	6.78203	8.61296	7.86965	8.1486	7.38898	6.80943	7.75719	7.61163	7.30564	7.73004	7.52582	6.76668	6.69529	7.78316	7.20466	7.35118	7.37398	7.02177	6.36284	6.91645	5.92442	6.60152	6.3777	7.11386	6.81429	5.66296	5.89404	6.40549	6.47584	7.20102	6.71835	6.8523	6.59797	6.46458	6.08309	6.41656	6.04167	7.44116	6.36381	6.27855	6.1317	5.74428	6.44183	6.36347
LesAffx.57363.1.S1_at	LesAffx.57363.1	0	0	10.4455	9.77158	10.8442	9.72482	9.57303	10.3125	9.88972	9.2484	10.8671	9.83169	10.7266	10.8455	10.1791	10.2012	9.87518	11.439	10.4344	11.6669	10.3509	9.54123	8.82507	10.5791	9.3087	9.2585	9.07718	7.8529	8.87654	7.84139	7.72702	8.07555	7.07546	7.72897	9.68526	9.7072	8.31054	7.03935	7.01681	7.79455	10.5811	11.4126	9.7771	7.95441	5.85525	7.37465	9.40918	10.2966
LesAffx.57572.1.S1_at	LesAffx.57572.1	0	0	7.48307	7.58883	6.94136	8.00346	7.78427	8.0359	7.85782	6.86577	7.86659	7.97222	7.79165	8.17882	8.29738	8.87648	8.62854	9.06179	8.70252	9.46382	8.76886	8.69145	7.55366	8.8898	7.89208	8.40372	8.58957	7.33475	8.75243	8.4985	7.91058	8.32616	7.73283	8.17208	9.11952	9.17913	8.32542	7.16164	7.26243	8.19856	9.63264	9.94058	9.71574	8.42993	6.2466	7.27144	9.24454	9.46691
LesAffx.57779.1.S1_at	LesAffx.57779.1	2.80738e-05	0.00100023	6.95116	6.79839	6.75397	7.32424	6.72871	7.30571	6.56483	6.56328	7.02466	7.04005	7.48519	7.74977	7.52945	7.63915	7.06895	7.89707	7.90985	7.96804	7.65036	7.46047	7.44652	7.86001	7.59443	7.84116	7.73701	7.7455	7.67838	7.89106	7.48628	7.76382	7.43729	6.90559	7.97611	7.8127	7.66229	7.55162	7.74878	7.81133	8.40185	8.33382	8.27221	7.92458	7.5787	7.80991	7.93131	8.34128
LesAffx.57791.1.S1_at	LesAffx.57791.1	9.09567e-05	0.00268616	9.45241	9.48873	9.4825	9.66467	9.83986	9.73425	9.76383	10.1531	10.0531	9.67116	9.93111	9.75033	9.10953	9.02948	9.11005	9.23917	9.24569	9.21572	9.18618	8.9466	9.09039	9.25627	9.20988	8.97617	8.94364	8.84239	8.6595	8.84574	8.84866	8.791	8.734	9.12496	9.02823	8.86915	8.66729	8.73144	8.90154	8.68446	8.50365	8.48971	8.46681	8.55192	8.97383	8.89164	8.84444	8.77417
LesAffx.58097.1.S1_at	LesAffx.58097.1	0.00258893	0.0461197	9.7706	9.56456	9.57929	9.77853	9.61365	9.75833	9.81642	9.48565	9.67086	9.64551	9.72098	9.65499	10.206	10.119	10.174	10.318	9.68471	9.97652	10.2864	10.0215	9.02236	9.83886	9.40672	9.48411	9.55595	8.68491	9.60881	9.64649	9.03646	9.24521	9.54763	9.60985	9.89878	9.69833	9.21378	8.85284	8.73569	9.38549	9.88358	10.0874	9.87871	9.71642	8.50858	8.86564	9.75606	9.88258
LesAffx.59059.1.S1_at	LesAffx.59059.1	0.000997841	0.0211755	9.29336	9.36319	9.40166	9.6524	10.2129	9.6245	9.98547	9.48253	9.34682	9.19967	9.19332	9.11933	9.47967	9.55967	9.44192	9.93481	9.52724	9.30963	9.66345	9.11224	8.94768	9.65017	9.02021	8.68891	8.9006	8.58117	8.82401	8.41605	8.50507	8.83347	9.03484	8.71699	8.86375	8.81105	8.55357	8.24611	8.12078	8.15518	8.75988	8.96002	8.64805	8.50702	8.08132	8.32705	8.52193	8.72886
LesAffx.59059.2.S1_at	LesAffx.59059.2	0.000252008	0.00648129	7.94637	8.21223	8.17562	8.35733	9.02487	8.47894	8.74189	8.39575	8.22683	7.91451	8.11166	7.88796	8.16568	8.37312	8.19746	8.57807	8.25677	8.19992	8.46901	8.01304	7.60708	8.10986	7.58172	7.46997	7.84746	7.56035	7.48987	7.40647	7.31862	7.70565	8.05139	7.68637	7.79209	7.76282	7.60031	7.06304	7.08066	7.16946	7.70601	7.73298	7.50625	7.33253	6.95494	7.35133	7.43568	7.64883
LesAffx.5912.1.A1_at	LesAffx.5912.1	0	0	8.68066	8.52442	8.4427	9.03308	8.2514	8.70985	8.38079	8.15476	8.62084	9.33453	9.00113	9.18761	10.2119	10.742	10.1622	10.9106	10.1354	10.7578	10.4866	10.2983	9.47821	10.6119	10.2334	10.4358	10.2291	9.499	11.103	11.0747	10.3083	10.3704	9.8846	10.0203	10.9168	10.9666	10.7189	9.70663	9.81202	10.5852	11.9152	12.1034	11.6035	11.1185	9.1329	9.17689	11.3844	11.46
LesAffx.5912.1.S1_at	LesAffx.5912.1	4.4167e-05	0.00146601	5.0508	5.03266	4.76061	5.01722	4.94062	5.05875	5.08508	5.30743	5.36808	5.65452	5.12047	5.37155	6.06284	6.16471	5.8657	6.21814	5.93504	5.9253	5.84407	5.70379	5.49136	6.61279	5.68783	5.9885	5.70196	5.27601	6.58981	6.59701	5.90616	5.82728	5.67059	5.47587	6.25374	6.48592	5.74902	5.25374	5.28439	5.71451	6.35585	6.76949	5.92293	5.59405	4.83295	5.41345	5.68998	5.8383
LesAffx.59625.1.S1_at	LesAffx.59625.1	0.00106376	0.0222702	6.14178	5.71786	5.22919	6.18088	6.43032	6.54051	6.04281	5.63966	6.16119	6.87637	7.259	7.25149	8.48941	8.54816	8.08448	8.47267	8.15476	8.28031	8.39484	8.40839	5.71991	8.08395	7.14398	8.67475	8.41065	7.64143	8.75033	8.67865	7.76707	8.73129	7.94966	8.49169	9.22454	9.26086	8.25962	7.65139	7.20727	8.6127	9.28965	9.50267	8.92215	8.65243	6.75236	7.10628	8.93672	9.16347
LesAffx.59668.1.S1_at	LesAffx.59668.1	3.99351e-06	0.000187985	6.73003	6.64857	6.60363	6.73986	6.49035	6.36552	6.67479	7.00067	6.29157	6.70643	6.71586	6.62222	7.95964	8.19714	7.77722	8.42181	7.66039	8.45109	8.19538	7.71507	6.97413	7.68752	7.26055	7.97543	8.17022	7.08348	8.73844	8.50502	7.52151	7.8474	7.39431	8.21126	8.75025	8.64344	7.89888	7.69814	7.39698	8.44993	9.74479	9.78504	9.32495	8.55288	7.49625	7.62974	9.16839	9.19212
LesAffx.59763.1.S1_at	LesAffx.59763.1	0.00271517	0.0478202	9.61624	9.54124	9.60745	9.71611	9.73818	9.68998	9.44646	9.67229	9.6195	9.51683	9.74204	9.40624	9.51659	9.59026	9.76778	9.82347	9.6457	9.44855	9.65612	9.79161	9.26881	9.70999	9.59316	9.54322	9.76616	9.44605	9.99522	10.0358	9.99455	9.54121	9.91364	10.0904	9.98665	9.8292	9.74151	9.77543	9.85627	9.94196	9.53653	9.73182	9.58214	9.87235	10.0368	9.74307	10.1137	9.79136
LesAffx.59769.1.S1_at	LesAffx.59769.1	1.93715e-05	0.000744844	10.6225	10.6378	10.3318	10.0456	10.0151	9.99458	9.62054	9.3951	9.2362	9.49574	9.44963	9.5534	9.24922	9.26731	9.21288	9.42711	9.67829	9.3764	9.28782	9.22283	10.0571	9.7626	10.1077	8.79175	8.8979	9.25654	9.1384	9.33739	9.13712	9.23707	9.64775	9.0042	8.85981	8.70563	9.43828	8.82028	8.89687	8.76397	9.31914	9.15121	9.01342	9.1852	8.91361	8.52567	8.94068	8.96363
LesAffx.6024.1.S1_at	LesAffx.6024.1	0.00255984	0.0457064	7.22586	6.87163	7.55499	7.68455	8.00125	8.00336	7.63218	7.52277	7.90843	7.43005	7.95051	7.92941	10.7831	10.9714	10.6643	11.0135	10.8229	10.3187	10.9644	10.9847	11.0379	10.8587	10.8279	11.783	11.7665	11.8169	11.7729	11.6113	11.8478	11.9434	11.5685	11.4144	11.7182	11.7193	11.5526	11.9395	12.0048	11.4916	11.2742	11.3676	11.3293	11.3522	11.7503	11.6917	11.1788	11.3852
LesAffx.60279.1.S1_at	LesAffx.60279.1	5.6684e-05	0.00178245	7.6929	7.77743	7.80868	7.6241	7.56988	7.90678	7.91809	7.58364	7.7441	7.96065	7.84054	8.0002	8.28548	8.3789	8.16655	8.23081	8.31184	8.19905	8.23133	8.29698	8.28679	8.2177	8.32673	8.56564	8.65282	9.076	8.11789	8.21165	8.36407	8.82336	8.50242	8.29954	8.14406	8.36929	8.40884	8.89448	8.69243	8.6511	8.08587	8.22037	8.47668	8.12881	8.33376	8.60975	8.07977	8.30554
LesAffx.62349.1.S1_at	LesAffx.62349.1	0	0	8.13584	8.32361	8.1254	8.96387	8.40487	8.89414	8.97578	8.39109	8.47334	8.76459	9.01566	9.36523	8.97005	8.79304	8.55325	8.92674	9.36406	9.12501	8.72034	9.03763	9.46418	9.35937	9.3424	7.21511	7.22538	6.95487	8.35527	7.75423	7.24807	7.19389	6.96656	7.63919	8.56603	8.37857	8.07344	6.59552	6.26724	7.65538	9.38881	9.40879	8.56296	7.6867	6.71107	6.93873	8.76946	8.9057
LesAffx.62570.2.S1_at	LesAffx.62570.2	0.0021494	0.0397486	9.1439	8.72499	8.66576	9.38188	9.05433	8.73802	9.50889	9.02177	8.95157	9.33944	9.26296	9.21132	8.29843	8.03682	8.25331	8.56351	8.44976	7.92682	8.67633	8.15745	8.43424	8.06124	8.78007	8.30472	7.91399	7.52921	8.97571	8.90104	8.38686	8.21036	8.6036	8.06064	8.51165	8.44713	8.23821	7.81458	8.37115	8.36529	9.54654	8.81852	8.62416	9.25634	8.49786	8.5862	8.82132	8.44568
LesAffx.62617.1.S1_at	LesAffx.62617.1	0	0	5.60224	5.90779	5.67947	5.84746	5.56759	5.65224	5.89653	5.71626	5.79614	5.89715	5.80587	5.89224	5.68785	5.37672	5.51662	6.94766	6.18026	6.73238	5.83378	5.73019	6.14425	6.73398	6.33357	5.57764	5.69518	5.40539	6.51882	6.15508	6.26941	5.52576	5.78426	5.65825	6.84423	6.62676	6.36616	5.87326	5.93614	5.78294	7.75049	7.8599	7.17986	6.12926	5.90562	5.84352	7.53414	7.4479
LesAffx.62669.1.S1_at	LesAffx.62669.1	0	0	6.53777	6.61615	6.68355	6.29611	6.57978	6.52919	6.71695	6.46553	6.85511	6.70777	6.70298	6.66466	7.01865	6.6564	6.68941	7.16554	7.04571	6.71752	6.96824	6.7488	7.1769	7.14545	6.93219	6.80407	6.6391	6.39945	7.46704	7.04949	7.37541	6.84471	7.14068	6.44955	7.28691	7.08106	7.42415	6.42914	6.42866	6.77251	7.67479	7.73397	7.40106	7.36919	6.86875	6.94511	7.30504	7.04008
LesAffx.62669.2.A1_at	LesAffx.62669.2	2.80142e-06	0.000136847	4.12308	4.12155	4.21916	4.59944	4.24481	4.31627	4.56913	4.16249	4.55045	4.41741	4.27634	4.58192	5.08883	4.49341	4.63097	5.83708	4.68925	4.43721	5.41096	4.61211	5.11858	5.11588	4.99978	4.89044	4.51026	4.58644	6.24921	5.85606	5.96968	4.89409	6.22162	4.49382	5.66677	5.48918	5.5749	4.40711	4.37699	4.26396	6.32846	5.84509	4.74318	5.22652	4.24198	4.27703	4.97509	4.69123
LesAffx.62669.2.S1_at	LesAffx.62669.2	0	0	4.75133	4.97192	4.93162	5.07678	4.62216	4.64117	5.74387	5.09015	4.84885	5.70069	4.98679	5.78804	6.87775	5.8182	5.88764	7.83413	5.85211	5.47176	7.03596	6.12134	6.62536	6.25001	6.63671	6.26797	5.56751	5.49477	8.37641	8.45382	7.73046	6.62003	8.2535	5.43819	7.78487	7.67781	8.13127	5.45255	6.1315	6.70881	9.39098	9.05653	8.16945	7.98203	6.30516	6.29827	8.22326	7.90849
LesAffx.62946.1.S1_at	LesAffx.62946.1	1.03712e-05	0.0004426	7.55362	7.45385	7.50808	7.60107	7.67055	7.64567	7.48183	7.17464	7.61007	7.74018	7.56754	7.60392	7.93987	8.18279	8.11135	8.1999	8.08022	8.37516	8.08534	8.17981	7.63793	8.08873	7.98202	8.16316	8.37507	8.03839	8.51603	8.47456	8.31067	8.20733	8.13195	8.36401	8.63102	8.50854	8.1576	8.06302	7.84194	8.1983	8.58193	8.52754	8.63717	8.31045	7.92705	7.96356	8.51787	8.45619
LesAffx.62975.1.S1_at	LesAffx.62975.1	5.96046e-08	4.06096e-06	8.82166	8.69334	7.5974	6.63151	6.94393	7.24352	6.35445	5.9268	6.43576	6.44136	7.13381	6.53329	6.16634	6.69541	6.71293	6.66376	6.46604	7.14568	6.22229	6.23512	6.41978	6.80052	6.99363	6.31641	6.87125	6.7531	6.92122	6.3903	6.62043	6.70562	6.67941	6.43628	6.84431	6.97499	6.90949	6.62107	6.35093	6.64767	7.52488	7.6028	7.46417	6.60836	6.23413	6.24263	7.25644	7.33611
LesAffx.63074.1.S1_at	LesAffx.63074.1	0	0	9.13569	8.96306	8.3292	8.63793	8.72633	8.67512	8.48397	8.13815	8.34301	7.8802	8.26103	7.94437	7.22637	6.98076	6.93424	7.32017	7.16463	7.11219	7.10687	6.95359	6.64762	7.58492	7.15359	7.05142	6.8135	6.40076	8.51106	8.53761	8.08517	7.17639	7.42368	6.99381	8.26239	8.24842	8.29177	6.28256	6.28254	7.1962	8.92223	8.88709	8.20883	7.58185	5.94067	6.05662	8.38716	8.23373
LesAffx.63782.1.S1_at	LesAffx.63782.1	5.53131e-05	0.00174641	9.1207	8.85264	8.82124	8.94141	9.01561	9.10361	8.877	8.84895	9.12131	8.83336	9.0069	9.05868	8.93763	8.74428	8.66976	9.09222	8.85061	8.8861	8.91808	8.88741	8.73448	8.91818	8.66205	8.7021	8.69546	8.58877	8.90128	9.01347	8.71245	8.73119	8.67248	8.65877	9.09863	9.06361	8.83244	8.49269	8.39884	8.81013	9.1635	9.3678	9.03876	8.74621	8.24942	8.07126	9.14085	9.0359
LesAffx.63935.1.S1_at	LesAffx.63935.1	0	0	9.86635	9.48085	8.63944	8.74169	8.86848	9.2042	8.31542	7.94938	8.13519	8.64387	9.30619	8.92173	8.41503	8.74194	8.26183	9.40176	9.08361	9.31248	8.61055	8.25157	8.33414	9.41516	8.65976	7.76118	7.98414	7.11093	8.95588	8.16409	7.99528	7.65194	7.30822	7.54118	8.86016	8.84843	8.357	6.99946	6.75472	7.27372	9.6167	9.47426	9.21562	7.80132	6.0954	6.77433	8.94709	9.25058
LesAffx.63984.1.S1_at	LesAffx.63984.1	6.49095e-05	0.00198485	7.54643	7.32823	7.37523	7.14706	7.54219	7.46984	7.55587	7.54627	7.39068	7.28197	7.43011	7.07594	7.2884	7.61912	7.50317	7.51323	7.15461	7.19474	7.4977	7.4928	7.02508	7.25786	7.17963	7.29647	7.53098	7.09357	8.17617	7.65471	7.64645	7.18155	7.92535	7.83907	7.94627	7.57837	7.9187	7.14366	7.4528	7.49504	8.58895	8.21445	7.82471	7.9472	7.70938	7.702	8.18194	8.16372
LesAffx.64333.1.S1_at	LesAffx.64333.1	0.00132656	0.0266927	12.9816	13.1912	12.9092	13.181	13.2149	13.4195	13.2833	12.9764	13.1804	13.3431	13.3764	13.4573	13.3973	13.6542	13.3053	13.1048	13.7595	13.7356	12.9803	13.527	13.2809	13.5522	13.4479	12.681	12.9703	13.185	11.7332	11.8681	12.1672	13.0268	12.5551	12.6149	12.2391	12.693	12.2941	12.9717	12.3712	12.7402	11.7824	12.4931	12.8344	11.7426	12.1471	12.6755	12.2319	12.8151
LesAffx.64439.1.S1_at	LesAffx.64439.1	0	0	11.6297	11.4309	10.1766	8.92476	10.2545	10.5237	9.30163	8.43914	9.69161	9.23348	10.3822	9.33991	7.00022	6.59754	6.74778	8.26442	8.32386	8.07646	7.0847	6.98232	8.53076	8.75934	8.26301	6.53197	6.16723	6.05835	7.97329	7.44822	7.29978	6.45862	6.64988	6.69889	7.93807	7.98469	8.04969	5.59152	6.13427	5.71964	8.25144	8.46765	7.81154	5.93322	5.99901	5.73302	7.69579	7.92312
LesAffx.64585.1.S1_at	LesAffx.64585.1	0	0	8.63221	8.97806	8.60093	8.47523	8.57259	8.53768	7.98128	8.21794	8.07968	8.22741	8.35099	8.62682	8.40764	8.43003	8.33328	8.9329	8.6157	8.9509	8.54032	8.1089	8.04335	9.05905	8.27722	8.30322	8.44815	7.84307	8.61037	8.02192	7.5824	8.16343	7.31881	8.27247	8.78024	8.84058	7.9543	7.86121	7.46276	8.14288	9.20458	9.47869	9.15327	8.20927	7.13139	7.8826	9.06193	8.87333
LesAffx.64689.1.S1_at	LesAffx.64689.1	6.30021e-05	0.00194955	6.9578	7.01537	6.83119	6.78303	6.93027	7.10894	6.72667	6.68394	6.54229	6.95672	6.94183	6.96239	7.66373	7.76175	7.46572	7.70791	8.00547	7.93004	7.54975	7.63958	7.54104	7.91188	7.50516	7.95117	8.07409	7.93693	8.24845	8.33966	7.76116	8.20757	7.93976	8.06357	8.20503	8.23611	8.12872	8.05637	7.50475	8.16013	8.82321	8.8593	8.57099	8.23096	7.70664	7.7708	8.45317	8.4795
LesAffx.64980.1.S1_at	LesAffx.64980.1	0	0	4.81865	4.88501	5.05213	5.12506	4.888	5.29321	5.13314	5.29839	5.32265	5.40316	4.96829	5.20897	5.23074	5.35368	5.02912	5.58561	5.34221	5.25404	5.36381	5.20118	4.78741	5.84614	5.15479	6.12094	5.92386	5.36307	7.73975	7.0809	6.23535	6.08271	6.46727	5.77659	7.12135	6.83634	6.91578	5.91722	6.39284	6.8706	9.01013	9.02321	7.45037	7.56146	6.24393	6.61891	8.20382	7.60604
LesAffx.65128.1.S1_at	LesAffx.65128.1	2.37823e-05	0.000879604	8.1098	8.05732	7.77919	7.49992	7.45801	7.37909	7.16201	7.47234	7.15819	7.71785	7.35658	7.39734	7.33878	7.41964	7.33037	7.20257	7.15715	7.37808	7.17897	7.25038	6.93931	6.6902	7.08539	7.35468	7.59256	7.36222	7.33657	7.37089	7.40509	7.53737	7.1801	7.38604	7.1348	7.14768	7.25434	7.53713	7.34751	7.43039	7.32564	7.33817	7.41639	7.47914	7.30531	7.29738	7.19597	7.23513
LesAffx.65520.1.S1_at	LesAffx.65520.1	1.66893e-06	8.69972e-05	11.64	11.4039	11.1314	11.3878	11.2128	11.4141	11.1043	10.8946	11.0265	11.0019	11.3135	11.3631	11.1851	11.2878	11.1732	11.4117	11.2303	11.3787	11.2601	11.1405	11.0432	11.1504	11.1244	11.0839	11.1265	10.8962	11.426	11.3718	11.1091	11.0388	11.0849	11.0323	11.4227	11.3574	11.2677	10.9155	11.0077	11.1763	11.738	11.8152	11.5951	11.3163	10.9854	11.1317	11.4264	11.5509
LesAffx.66054.1.S1_at	LesAffx.66054.1	0.0013923	0.0279432	6.59923	6.37556	6.48109	6.24835	6.2922	6.47527	6.14705	6.0827	6.13363	6.07327	6.31401	6.49584	6.66771	6.91294	6.59525	6.4668	6.82207	7.01553	6.52654	6.95555	6.65232	7.0788	6.96832	7.16889	7.77356	7.97179	6.83696	6.71048	7.25757	7.38469	7.333	7.35739	6.80791	6.91245	7.35923	7.56286	7.28244	7.26375	6.65471	6.85196	6.9956	6.47992	6.99706	7.11739	6.73641	6.89427
LesAffx.6614.2.S1_at	LesAffx.6614.2	0	0	6.86284	5.71967	5.31864	5.35876	5.71834	6.10857	5.83887	5.39728	5.79497	5.28378	5.92745	6.00371	5.06628	5.16453	4.85997	5.62613	6.0641	5.48747	5.49919	5.43111	5.98398	5.88994	6.14973	5.73508	5.2838	5.53653	6.82912	6.181	6.26395	5.28334	5.3987	4.91471	6.65628	6.57787	6.39047	4.67785	5.44674	5.17253	7.17707	7.06451	6.587	5.51542	5.30586	5.09706	6.50189	6.44998
LesAffx.66354.1.S1_at	LesAffx.66354.1	0	0	4.02293	3.93405	4.23998	4.43482	4.15406	4.25955	4.17151	4.29494	3.89915	4.17151	4.32359	4.14856	5.24877	4.98965	4.37498	6.99643	6.14803	6.61678	5.33157	4.99947	6.22269	6.81213	6.30762	5.81284	5.38692	4.49559	8.11069	7.10133	7.35152	5.24325	6.06135	4.91412	7.97497	7.7741	7.45277	4.70666	4.61337	5.78827	9.05578	8.74398	8.34665	7.18786	4.57691	4.5041	8.4385	8.6829
LesAffx.66384.1.S1_at	LesAffx.66384.1	0.00153202	0.0300484	6.71156	6.71594	6.48817	5.90637	6.1756	5.97355	6.31606	6.19373	6.33765	6.08178	6.31372	6.38519	6.2436	6.04897	6.09547	5.9943	6.12078	6.49031	6.09952	6.0368	6.49376	6.30661	6.76095	5.38939	5.58007	5.36368	5.82825	5.63125	5.66052	5.2483	6.21478	5.45798	5.24276	5.04293	5.86126	5.31124	5.6175	5.41737	5.4516	5.69444	5.2285	5.32188	5.67199	5.70976	5.44886	5.41924
LesAffx.67073.1.S1_at	LesAffx.67073.1	0.000396371	0.00953131	6.4243	6.65175	6.68013	6.73572	6.76985	6.86144	6.50497	6.26465	6.44499	6.68729	6.63545	6.64128	6.72732	6.7072	6.80434	6.56351	6.78403	6.63434	6.72097	6.79424	6.67682	6.81772	7.00495	6.99957	7.08743	7.51152	6.92933	6.87739	7.12301	7.11761	7.15086	7.03901	6.90245	6.80667	7.03731	7.08065	6.99801	6.9677	6.51293	6.38223	6.60148	6.51639	7.01148	6.96227	6.84565	6.63927
LesAffx.67116.1.S1_at	LesAffx.67116.1	1.90735e-05	0.000737034	5.59182	5.73932	5.77124	5.66472	5.94971	5.805	5.46125	5.62244	5.77954	5.54474	5.71215	5.72358	6.37756	6.98034	6.55469	6.91861	5.88474	7.08428	6.73362	6.58791	5.70059	6.46582	6.18517	6.36116	6.61519	5.74675	7.10508	6.5591	6.06533	5.93365	5.99807	6.92009	6.95048	7.13968	6.36205	5.65513	5.83131	6.66241	7.75845	8.19993	7.47428	6.57734	5.92491	5.95315	7.52517	7.35327
LesAffx.67592.1.S1_at	LesAffx.67592.1	0	0	4.56951	5.10256	4.85734	5.29333	4.88567	4.82956	4.99535	4.88869	4.8968	5.03624	5.13185	5.14133	4.5518	4.42141	4.5353	5.8582	5.11475	5.63275	4.78058	4.73637	6.31424	6.25046	6.05528	4.96124	4.60629	4.81276	10.0357	8.97316	8.88359	5.00897	5.80282	4.91698	9.24986	9.17006	9.04321	4.70411	5.08293	6.09227	11.463	11.4837	9.86525	7.26965	4.90775	5.19306	10.2892	10.5856
LesAffx.67643.1.S1_at	LesAffx.67643.1	0.000113249	0.00324577	5.49869	5.35352	5.93911	6.04108	5.37034	5.16692	5.44414	5.51073	5.83822	5.52407	5.51369	5.49851	5.98725	6.03292	6.78872	5.66302	4.89802	5.84216	5.73566	6.55173	5.34222	4.98136	5.20887	5.64808	6.02163	4.51223	6.60783	6.1425	5.5659	4.73468	5.29283	6.36489	6.73017	6.23958	6.51776	5.33512	4.68666	5.54445	7.06031	7.16613	6.37442	6.3217	5.53858	5.59283	6.96756	6.63131
LesAffx.68092.1.S1_at	LesAffx.68092.1	0.000770628	0.0170526	6.29348	6.50654	6.2314	6.75487	7.66906	7.61393	7.81699	7.49456	7.77243	7.89778	7.7454	7.53149	7.97134	8.41705	8.24591	7.67642	8.14177	8.31964	7.7409	8.26891	6.95079	7.78033	7.51937	8.03956	8.60712	8.41746	7.85078	7.77	7.67858	8.48729	8.10936	8.486	8.2581	8.54988	7.94139	8.41443	7.89136	8.30401	7.91705	8.28503	8.68237	7.7005	7.50504	8.145	7.97025	8.43878
LesAffx.68107.1.S1_at	LesAffx.68107.1	0	0	10.739	10.7386	9.5409	8.41879	9.1772	9.58789	8.70609	7.79535	8.94504	8.35355	9.32593	8.28557	7.03225	6.83983	6.36272	7.6221	7.34134	7.27506	7.04221	6.29279	7.16699	7.42235	7.05997	6.54383	6.15845	6.08043	7.09894	6.81185	6.44326	6.29021	5.91527	6.05071	7.01434	7.27704	6.92018	5.66993	5.99582	5.92746	7.71404	7.59976	7.18481	6.41218	5.52941	5.77263	7.20597	7.42224
LesAffx.69088.1.S1_at	LesAffx.69088.1	1.19209e-07	7.71582e-06	7.16771	7.38107	6.81035	7.27327	7.44888	7.3832	7.28841	7.40088	7.54801	7.58155	7.49459	7.51894	8.51028	8.80512	8.54461	8.54447	8.18092	8.88727	8.56509	8.44638	7.79528	8.22906	8.14721	8.59197	8.59748	8.29236	9.19587	8.60206	8.53116	8.20981	8.35071	8.76627	9.0344	8.97378	8.78886	8.36159	7.78493	8.74196	9.86784	9.74897	9.47279	9.05796	8.12699	8.34593	9.412	9.4901
LesAffx.69659.1.S1_at	LesAffx.69659.1	0	0	8.55064	8.17402	8.00861	8.35077	8.03158	9.05593	7.83679	7.5756	8.15056	8.46528	9.32882	9.73614	9.1306	8.89821	8.6793	9.74978	9.54157	10.0023	9.56855	8.56765	8.78194	9.71463	8.75797	9.03615	9.14904	8.41386	9.48598	9.4631	9.14821	8.82486	7.89114	8.08744	10.1869	10.3143	9.29384	8.21018	8.5067	9.01501	11.1118	11.2012	10.3199	8.66828	7.21225	8.15081	10.373	10.9284
LesAffx.69808.1.S1_at	LesAffx.69808.1	0	0	4.67317	4.91906	4.19797	4.51506	4.11514	4.26311	4.49161	4.32901	4.15047	4.26344	4.70287	4.69761	4.14997	4.39905	4.11091	5.1429	5.42528	5.16283	3.98336	4.05265	4.86958	5.95976	5.19349	4.45226	4.09171	4.0587	5.30489	4.85131	4.42929	4.15339	4.099	4.19517	5.41775	5.19267	4.74671	4.172	3.96144	4.13575	6.098	5.73884	5.94009	4.40535	3.97681	4.18521	5.47996	5.67844
LesAffx.69872.1.S1_at	LesAffx.69872.1	0	0	6.6275	6.33749	7.19263	6.12955	6.26271	6.26191	5.86531	6.37513	6.59425	6.43488	6.31669	6.05414	5.96251	6.06687	5.4355	7.16248	7.37692	7.58012	5.60167	6.3031	7.78461	7.50154	7.05289	5.66875	5.99714	6.12267	5.97253	6.11925	5.71322	5.98402	5.82279	6.15364	6.52221	6.68142	5.9719	6.27231	6.02559	5.47661	6.53996	6.73221	6.44093	5.56893	6.37318	6.57863	6.57992	6.37611
LesAffx.70212.1.S1_at	LesAffx.70212.1	0.00277424	0.04864	6.18807	6.49784	6.38426	7.18703	7.05082	7.20961	6.66581	6.19709	6.93045	6.59182	6.26249	6.76998	5.50625	5.58623	5.63607	5.836	6.01351	6.14714	5.29609	5.70209	5.80164	5.54382	5.93842	6.02757	5.77684	7.3187	5.32408	5.45438	5.82072	6.20025	6.05081	6.04843	5.53629	5.72826	5.54275	6.19771	5.81039	5.72196	5.70251	5.37383	6.03701	5.41654	6.03613	6.04953	5.56669	5.95227
LesAffx.70406.1.S1_at	LesAffx.70406.1	0	0	4.65521	4.74806	4.64198	4.86917	4.66171	4.6948	4.69048	4.68983	4.71303	4.83833	4.62691	4.76967	4.67989	4.54789	4.67494	4.41611	4.6592	4.80043	4.81453	4.72612	4.60784	4.74557	4.43869	5.1015	4.99735	4.91826	5.40564	5.2404	5.08502	4.69493	5.13764	5.0874	5.13913	5.10041	5.29129	4.96928	4.82452	5.2061	6.50511	5.83082	6.12214	5.95658	4.92392	5.0131	6.12974	5.56603
LesAffx.70722.1.S1_at	LesAffx.70722.1	0	0	11.5146	10.5846	10.7357	9.68726	9.00789	9.1814	8.32708	7.32576	7.61523	7.49862	7.7238	7.64117	6.99234	6.58279	6.67017	7.69629	7.26325	7.18121	6.93327	6.81608	8.00081	7.50112	7.44293	6.22914	6.21888	5.85167	6.74065	6.80237	6.39564	6.22754	6.22903	5.94535	6.65335	6.49624	6.3399	5.97234	6.39671	6.0136	7.39815	7.34225	6.64637	6.14932	6.29919	6.22639	6.48408	6.67375
LesAffx.70732.1.S1_at	LesAffx.70732.1	0.00194442	0.0365674	5.59766	5.9584	6.31914	5.55906	6.12307	5.67267	5.99064	6.34515	6.43317	5.97302	5.87226	5.69719	7.37713	7.103	6.52593	7.07682	6.21356	7.15309	6.95626	6.89374	7.34313	6.30735	6.32261	6.71773	6.51787	5.42839	7.83296	6.63251	5.95106	5.64907	6.20737	6.37059	7.31518	6.84594	6.44323	6.15979	5.85022	6.85749	8.07797	8.30906	7.84108	7.84862	6.57463	6.14815	8.2622	8.36489
LesAffx.71016.1.S1_at	LesAffx.71016.1	3.8147e-06	0.000181771	5.80685	5.10305	5.38228	5.79646	5.32787	5.38958	5.44746	5.76724	5.67247	5.84818	5.42726	5.77295	6.54319	5.69576	5.51036	6.34446	5.53294	5.78868	6.50601	5.90614	5.95991	5.80807	5.53599	6.14986	5.6368	5.40558	5.39978	5.96605	5.43767	5.61338	5.36987	5.49772	6.49848	6.17461	5.55014	5.47286	5.61936	5.62084	7.0831	7.45638	6.92479	6.33672	5.50594	5.56682	7.28536	7.45837
LesAffx.71021.1.S1_at	LesAffx.71021.1	0.00169426	0.0325726	10.5638	10.5479	10.5268	10.5999	10.6461	10.7713	10.4204	10.5114	10.3778	10.5089	10.6974	10.7211	11.0091	11.1475	10.9868	10.7616	11.039	10.9626	10.8502	11.0211	10.6648	11.0405	11.0444	10.7517	11.092	10.8897	11.1596	11.0439	10.7976	10.8921	11.0214	11.1207	11.2371	11.253	10.9743	10.8316	10.9831	11.2067	11.6567	11.82	11.3518	11.0592	11.0917	11.0779	11.3947	11.4549
LesAffx.71065.1.S1_at	LesAffx.71065.1	0	0	7.97371	7.87655	7.25058	7.73225	7.84265	7.84492	8.13556	7.68591	7.42471	7.98419	8.11246	8.3107	8.01031	7.43035	7.33668	7.89364	7.48588	7.12345	8.09389	7.58929	7.63793	7.96988	7.65149	7.12655	6.49632	6.75683	7.6334	7.38852	7.32074	7.10471	6.91964	6.56949	8.25803	7.94963	7.74646	6.59257	5.98182	7.30809	8.56725	8.27162	8.28099	7.94381	5.65471	6.19735	8.26152	8.24747
LesAffx.71107.1.S1_at	LesAffx.71107.1	0.000171125	0.0045832	8.70667	8.56816	8.73531	8.38148	8.46403	8.51164	8.36805	8.22644	8.49841	8.5106	7.98387	8.67023	9.90261	9.78828	9.87637	9.61416	9.59687	9.54314	9.89938	9.9024	9.722	9.33054	9.7636	10.3302	10.5151	10.3257	10.5939	10.7295	10.768	10.3037	10.4146	10.2173	10.5019	10.0908	10.4795	10.3244	10.6358	10.383	10.352	10.1324	10.0788	10.5752	10.5737	10.2621	10.1818	9.97609
LesAffx.71532.1.S1_at	LesAffx.71532.1	0.000168026	0.00451576	10.815	10.7062	10.1763	10.3492	10.508	10.6007	10.1448	10.2858	10.4693	10.3156	10.8707	10.5684	9.61988	9.60053	9.4542	9.80564	10.3779	10.2513	9.85613	9.91611	9.69437	9.92578	9.62143	9.22865	9.32977	9.57944	8.65685	8.70009	8.79175	9.28721	8.99836	9.25816	9.24669	9.44468	9.12609	9.1391	8.57265	8.86234	8.98848	9.65754	9.33794	8.28562	8.27979	8.72642	9.29948	9.51425
LesAffx.71544.1.S1_at	LesAffx.71544.1	3.57628e-06	0.000171463	7.49369	7.51706	6.56703	6.86505	6.76604	7.41259	6.50065	6.28443	6.32098	6.93588	7.41396	7.3688	6.95657	7.24122	6.86434	7.38878	7.49517	7.71329	6.96928	7.12893	6.88313	7.78856	7.50453	7.24299	7.47873	7.08075	7.61452	7.34328	7.22526	7.42979	7.26907	6.9439	7.65622	7.50217	7.68378	6.77949	6.69819	7.22899	8.12011	8.16319	7.98195	7.25992	6.50919	6.61156	7.73927	7.98889
LesAffx.71608.1.S1_at	LesAffx.71608.1	1.78814e-07	1.1384e-05	8.67854	9.82027	8.61117	5.81616	7.45322	7.5317	6.7911	5.88983	6.79897	5.80678	6.67721	5.97472	4.34525	4.52531	4.20445	4.35927	4.28116	4.21208	4.33253	4.26067	4.31165	4.4764	4.30524	4.31082	4.22896	4.04276	4.17525	4.20774	4.11913	4.06622	4.10657	4.33245	4.27515	4.13464	4.18178	4.1512	4.2234	4.37227	4.41449	4.30371	4.29291	4.25896	4.16971	4.19227	4.36764	4.27424
LesAffx.71654.1.S1_at	LesAffx.71654.1	0	0	10.3074	9.67961	9.04155	10.2771	9.87029	10.3119	9.73635	9.31159	9.39216	9.43207	9.78885	9.75914	7.84474	7.75924	7.77817	8.57495	8.32938	8.27583	7.93837	7.59772	8.41317	8.32986	8.41322	6.85091	7.34994	7.11598	8.33278	8.1701	7.87472	7.26361	8.02959	7.49282	7.87505	7.98319	8.05994	7.09332	7.1566	7.47208	8.543	8.4182	7.97666	7.12164	7.80579	7.49016	8.13903	7.9767
LesAffx.735.1.S1_at	LesAffx.735.1	0	0	8.9389	8.62634	7.68086	6.93177	7.40187	7.40989	6.76398	5.97946	6.70087	7.28793	7.63045	7.21889	6.41527	6.7907	6.70406	7.19777	7.13528	7.31481	6.6203	6.55096	6.80494	7.0952	7.06151	6.59313	6.90086	6.4869	6.97544	6.65997	6.93504	6.62547	6.57171	6.08168	6.87724	6.88407	6.72262	6.16605	5.91353	6.16268	7.2401	7.50547	7.17281	6.24468	5.48735	5.83682	6.89866	7.09128
LesAffx.7602.1.S1_at	LesAffx.7602.1	4.84586e-05	0.0015748	8.10141	7.78813	8.16694	8.15899	8.21534	8.20767	8.27276	8.44455	8.29831	8.25376	8.32336	8.51639	8.46528	8.51592	8.49274	8.6252	8.62787	8.4645	8.61043	8.57973	8.17969	8.62232	8.31258	8.76248	8.9389	8.52507	9.12981	8.85628	8.575	8.64458	8.57809	8.81941	9.11167	9.1006	8.9669	8.50352	8.49874	8.92403	9.67908	9.75337	9.14017	9.06016	8.55625	8.6021	9.2463	9.18493
LesAffx.770.1.S1_at	LesAffx.770.1	0.00270963	0.0478311	9.49734	9.17957	9.15383	9.12675	9.04336	9.40121	9.21238	8.61053	8.93291	8.83812	9.4045	9.47465	7.72729	7.91198	7.64764	8.04836	8.01658	7.57692	8.16254	7.96625	8.47093	7.99716	8.7373	6.38283	6.2435	5.97528	6.21895	6.65232	5.76053	6.42386	6.10188	5.60173	6.44654	6.0797	6.12325	5.95533	5.72392	5.8508	6.99394	6.95867	6.36677	6.97427	5.86052	5.82668	6.64508	6.38506
LesAffx.805.1.S1_at	LesAffx.805.1	3.99351e-06	0.000186853	8.33736	7.98805	8.01584	8.19616	8.47667	8.3192	8.41006	8.09997	8.32405	7.85209	8.2283	8.36983	7.9172	7.95772	7.97295	8.82906	7.15594	7.97973	8.75344	7.81209	6.98598	7.52962	7.65841	7.65069	7.53714	6.69263	8.86745	8.27221	7.88033	7.11236	8.23734	7.45842	8.36802	8.12332	8.31561	6.67537	7.23713	7.63307	9.27281	9.31192	8.36653	8.63245	7.24941	7.17971	8.64611	8.73095
LesAffx.8720.1.S1_at	LesAffx.8720.1	0	0	4.94984	5.33349	5.21554	5.1241	5.44957	5.28262	5.12228	5.40946	5.07553	5.34214	5.18324	5.17797	5.54216	6.34564	5.22862	7.04966	5.99905	7.45182	6.15547	6.20813	6.707	7.36534	7.38014	6.5448	6.33763	6.40075	9.13857	8.21398	8.87939	7.52154	8.17874	6.94942	8.82471	8.57615	9.01467	6.18654	6.86341	7.46227	10.9481	10.8201	9.83848	8.3347	6.45831	5.95739	9.77451	9.99225
LesAffx.8720.2.S1_at	LesAffx.8720.2	0	0	5.02181	5.12753	5.19906	5.61212	4.63823	5.06892	5.19328	4.91807	5.20252	5.54453	4.95779	5.50079	6.95124	7.19255	6.81806	8.73847	7.91467	8.67962	7.85464	7.31841	8.22245	8.87868	8.47405	8.18557	7.76789	7.5797	10.6815	9.98518	10.1921	8.98319	9.80206	8.16539	10.1925	10.3135	10.403	7.8317	8.46019	9.16755	12.2731	12.2375	11.3338	10.1385	8.06445	7.50738	11.3974	11.4539
LesAffx.8850.1.S1_at	LesAffx.8850.1	0	0	5.50055	5.05483	4.89227	5.58685	5.33012	5.20939	5.47106	5.48662	5.4511	4.97323	4.94614	5.3845	5.25431	5.6981	4.76648	6.01425	6.20825	7.09009	5.1662	5.64979	5.20132	6.83639	5.74188	6.03357	5.85202	6.06549	8.13462	8.31197	7.52348	6.0219	4.93247	5.64956	9.47809	9.13734	8.31936	5.93101	5.95142	7.54351	11.3833	11.2777	10.8387	5.96366	5.29403	5.29703	10.2013	11.1578
LesAffx.8872.1.S1_at	LesAffx.8872.1	0.00114089	0.0233808	6.29635	6.637	6.61322	7.14858	6.83322	7.10338	6.80408	7.03099	6.47911	7.16015	7.02722	6.88161	6.52821	6.13832	6.22376	5.94158	6.3601	6.47516	6.16381	6.20114	6.28161	6.25127	6.27966	5.98593	6.33663	6.40989	5.58939	5.77706	5.47485	6.16355	5.96344	6.25868	5.85639	6.08485	6.12583	6.19481	5.86743	5.95208	5.80254	5.77066	6.17898	5.65694	5.93714	5.92405	5.74176	6.09004
LesAffx.9038.3.S1_at	LesAffx.9038.3	0.00188696	0.0356595	8.08544	7.91683	7.97201	8.31312	8.32139	8.2449	8.81103	7.70369	8.20704	8.70092	8.8831	9.17138	8.42585	8.66755	8.45036	9.04077	8.5562	8.32077	8.94028	8.55128	7.94172	8.55367	8.77614	8.87031	8.79952	8.65983	9.54446	9.37277	8.90478	8.87384	8.91237	8.17799	9.22165	8.69513	9.34968	8.288	8.69716	8.90432	9.9476	9.44696	8.96501	9.53425	8.7693	8.94965	8.73117	9.19735
LesAffx.9043.1.S1_at	LesAffx.9043.1	0	0	7.34302	7.48201	7.60558	7.81633	7.55572	7.87122	7.68324	7.65487	7.58732	7.98182	7.83918	8.22083	8.4774	8.717	8.63306	8.58023	8.52209	8.65645	8.61381	8.66448	8.53001	8.50407	8.98805	8.70096	8.99614	9.02519	9.31873	8.91797	8.99046	8.88389	8.89401	9.14226	9.15157	9.31523	9.26317	8.56765	8.33688	8.92619	9.93051	9.62748	9.48381	9.22202	8.54749	8.50807	9.51739	9.51809
[truncated: 1 more columns]

## Sheet: Table S3B
Table S3B. Output from Bayesian estimation of temporal regulation (BETR) algorithm to identify tomato genes differentially regulated following Botrytis cinerea infection of BABA-primed plants. Raw P-values were subsequently adjusted for multiple hypothesis testing using using the Benjamini and Hochberg correction. Data following P-values are the log2-transformed Affymetrix signals for each treatm…
Affy Probe ID	Transcript ID	BETR P-value	B&H correction	Control 0h Mock Rep1	Control 0h Mock Rep2	Control 0h Mock Rep3	Control 0h Botrytis Rep1	Control 0h Botrytis Rep2	Control 0h Botrytis Rep3	BABA 0h Mock Rep1	BABA 0h Mock Rep2	BABA 0h Mock Rep3	BABA 0h Botrytis Rep1	BABA 0h Botrytis Rep2	BABA 0h Botrytis Rep3	Control 6h Mock Rep1	Control 6h Mock Rep2	Control 6h Mock Rep3	Control 6h Botrytis Rep1	Control 6h Botrytis Rep2	Control 6h Botrytis Rep3	BABA 6h Mock Rep1	BABA 6h Mock Rep3	BABA 6h Botrytis Rep1	BABA 6h Botrytis Rep2	BABA 6h Botrytis Rep3	Control 9h Mock Rep1	Control 9h Mock Rep2	Control 9h Mock Rep3	Control 9h Botrytis Rep1	Control 9h Botrytis Rep2	Control 9h Botrytis Rep3	BABA 9h Mock Rep1	BABA 9h Mock Rep2	BABA 9h Mock Rep3	BABA 9h Botrytis Rep1	BABA 9h Botrytis Rep2	BABA 9h Botrytis Rep3	Control 12h Mock Rep1	Control 12h Mock Rep2	Control 12h Mock Rep3	Control 12h Botrytis Rep1	Control 12h Botrytis Rep2	Control 12h Botrytis Rep3	BABA 12h Mock Rep1	BABA 12h Mock Rep2	BABA 12h Mock Rep3	BABA 12h Botrytis Rep1	BABA 12h Botrytis Rep2
Les.101.1.S1_at	Les.101.1	4.47631e-05	0.0012417	12.8986	13.0271	12.7187	12.8302	12.9044	12.9933	12.6755	12.5634	12.6843	12.8387	12.9701	12.9056	12.9039	12.8469	12.7461	12.8734	12.8753	13.1088	12.6697	12.7525	12.5601	12.8486	12.5097	12.6589	12.7981	12.5549	12.5929	12.7295	12.5637	12.7472	12.5064	12.7706	12.9738	12.8854	12.6357	12.6235	12.3727	12.7629	12.8933	13.0472	13.0398	12.6058	12.3553	12.6314	13.0123	13.0716
Les.1018.1.A1_at	Les.1018.1	0.00326145	0.0318237	8.67579	8.98178	8.92782	8.74137	8.96391	8.81291	8.66619	8.65828	8.85305	8.47219	8.71404	9.02965	8.65785	8.0936	8.37374	8.42816	8.40485	8.218	8.44007	8.13446	7.76541	8.53058	7.86793	7.82059	7.61251	6.65258	7.89334	7.531	6.97366	7.36666	7.1564	7.94832	8.34357	8.24838	7.37017	7.16161	6.18395	7.69099	7.78679	8.32193	7.85026	7.48431	6.54955	6.97302	8.0134	8.12552
Les.1020.1.A1_at	Les.1020.1	0.000741065	0.0103522	9.09114	8.83236	9.01704	9.22866	8.77083	8.93207	8.92974	8.70697	8.54275	9.08061	8.99968	8.8473	9.75135	9.38285	9.70851	9.76275	9.93371	9.56898	9.5339	9.69788	10.295	10.0484	10.0268	9.9308	9.7724	10.0054	9.89913	9.84367	10.031	9.91872	10.0727	9.77971	9.70593	9.46514	9.88354	10.1042	9.9804	9.58908	9.79146	9.67906	9.64485	9.57303	9.92549	10.3372	9.5097	9.44191
Les.1091.1.A1_at	Les.1091.1	0.00124353	0.0153553	9.89351	9.78565	9.82372	9.7384	9.38629	9.42931	9.41303	9.65497	9.56492	9.2281	9.43291	9.46098	9.29733	9.0904	8.96994	9.04942	9.22229	9.12545	9.02376	9.17323	9.69264	9.26631	9.40353	8.92504	8.90354	9.04214	8.90254	9.09431	8.96762	8.75524	8.98373	8.74499	9.01852	9.04851	9.03608	9.09427	8.73548	8.866	8.92309	9.05839	8.9945	8.44506	8.85361	8.75799	9.14919	9.11959
Les.1101.1.A1_at	Les.1101.1	0.000710726	0.0100734	7.13556	7.55803	7.82106	8.36596	8.73808	8.8233	9.17761	8.81198	9.04	8.45398	8.51312	8.09239	7.77875	7.73007	7.52901	7.52313	8.03594	8.18181	7.62709	7.86292	7.76379	7.68632	7.74324	7.60476	8.00921	8.10707	7.21265	7.77422	7.50251	8.02159	7.63063	7.95416	7.44738	7.78302	7.75901	8.06898	7.57729	8.12731	7.65287	7.79465	8.20826	7.81787	7.44452	7.51764	7.88438	7.87006
Les.112.1.S1_at	Les.112.1	0	0	12.8918	12.7945	12.869	12.9269	12.729	12.8084	13.0276	12.8931	12.6589	12.9607	12.8992	12.8403	11.1869	10.8074	11.1455	10.7235	11.6821	10.8571	11.1307	10.6068	12.2672	11.7815	12.1423	9.10135	8.67832	9.42209	8.69309	9.13393	9.25319	9.29599	9.10049	8.3807	8.52652	8.31889	8.66078	9.58193	10.0682	8.564	9.05729	8.07072	8.36657	8.84451	9.68382	9.96765	8.54327	8.41694
Les.113.1.S1_at	Les.113.1	1.78814e-07	1.32271e-05	5.94448	6.23553	5.75001	6.60418	5.88324	6.07138	5.50414	5.3903	5.67671	6.16545	6.05831	6.263	7.98722	8.2683	7.72709	8.8815	8.88874	9.09094	7.90195	7.60483	7.285	9.45287	7.38627	7.21087	7.45082	6.2659	8.07912	7.64293	7.04135	7.02561	6.31667	7.38857	8.48859	8.53472	7.60603	6.8506	6.81924	7.75689	9.1262	9.22607	9.3	7.20526	6.0921	6.59192	8.68386	9.07961
Les.1132.1.A1_at	Les.1132.1	0	0	9.14137	9.45021	9.02161	8.68679	8.3245	9.09886	9.04496	8.43972	8.09885	8.6611	8.87245	9.12687	8.27426	8.28023	8.13035	8.2094	10.1923	8.52623	8.04249	8.06027	10.544	10.4603	10.2173	8.57196	7.90353	9.05648	8.09349	8.77956	9.03191	9.14595	8.71331	7.76584	8.07606	8.08554	8.42406	9.12471	10.1504	8.05188	9.148	7.99536	7.9363	8.25303	9.78702	10.211	7.99967	7.99208
Les.1151.1.A1_at	Les.1151.1	0.000453115	0.00715313	8.25002	8.39346	8.26675	8.21356	8.09711	8.26145	8.19037	8.16304	8.01852	7.96177	8.14615	8.23864	7.82984	7.74749	7.57099	7.55848	7.93595	7.63088	7.69881	7.50118	8.21997	7.8765	7.93659	7.74687	7.52568	7.71718	7.76058	7.79843	7.8097	7.78328	7.61852	7.2523	7.58924	7.41688	7.64929	7.75907	7.89138	7.65988	7.7999	7.5912	7.86206	7.71155	8.17072	8.2043	7.34929	7.50915
Les.1155.1.S1_at	Les.1155.1	0.000164866	0.0033966	9.24461	9.08748	9.32457	9.54567	9.38726	9.34441	9.35004	9.35995	9.41687	9.40281	9.49329	9.47271	10.1424	10.3495	10.3201	10.6712	9.3537	10.1298	10.3711	10.1983	9.12246	9.71939	9.28191	9.9158	9.90081	9.13892	10.0936	9.52279	9.47203	9.43541	9.67922	9.89839	10.04	9.85496	9.42236	8.96892	9.40659	9.77626	10.1919	10.3983	9.97718	10.1247	9.40112	9.66487	9.81083	9.99762
Les.1172.1.A1_at	Les.1172.1	0	0	8.21054	8.21458	8.45861	8.23672	8.34732	8.27324	8.10355	8.3991	8.42213	8.46544	8.07614	8.25095	8.72889	8.65649	8.87456	9.01418	8.47712	8.60812	8.93266	8.98576	8.32216	8.05985	8.11909	9.76324	9.96797	9.81044	9.64454	10.0121	9.58515	9.91582	9.8767	9.87418	9.64436	9.84736	9.83707	9.87314	9.9662	9.91833	9.66095	9.72623	9.96081	9.82488	9.79922	9.54082	9.73028	9.88538
Les.1175.2.S1_at	Les.1175.2	0.00573188	0.0480772	6.51287	6.61988	6.20539	6.76354	6.66923	5.47879	6.49149	5.3713	5.39735	6.59145	6.38687	6.55857	5.80254	6.33144	5.43932	5.98566	5.92613	5.83312	6.04807	5.43995	6.54571	5.73768	7.0008	7.35913	6.39881	8.0589	8.7094	8.54107	8.30835	7.95785	7.14823	6.39136	6.4199	6.39106	8.05348	6.75043	7.74569	7.11045	9.75369	7.4463	7.23908	8.27379	8.14248	8.89429	6.9487	6.56074
Les.1197.1.S1_at	Les.1197.1	0.000200987	0.00394208	4.65006	4.35032	4.70682	5.03523	5.10367	5.13126	4.87851	4.94811	5.38342	5.08494	4.65568	4.89894	4.77561	5.02112	5.22743	5.03793	5.47274	5.07527	4.91373	5.04683	5.77568	4.95768	5.39798	4.60916	5.0391	5.40992	5.17883	4.81866	5.67701	5.01161	5.6764	5.27069	4.84797	4.68139	5.09208	4.87055	5.45063	4.87803	4.92057	4.72443	4.65642	4.92634	5.40729	5.64275	4.35174	4.55074
Les.1197.2.A1_at	Les.1197.2	4.70877e-06	0.00021019	7.6457	7.70954	7.99558	9.34146	9.26401	9.19813	8.67313	8.59301	9.5804	9.23602	8.65706	8.90778	8.91188	8.4695	8.82491	9.12267	9.71269	8.94657	8.76323	8.81491	10.1745	9.21042	9.22952	8.57598	8.24776	9.09311	9.20418	9.40135	9.56426	9.08054	9.43814	8.43667	8.18823	8.198	8.85002	8.6863	9.55929	8.02743	8.79459	8.16391	8.06502	8.7224	9.3356	9.69762	7.62707	7.57049
Les.1198.1.A1_at	Les.1198.1	2.79546e-05	0.000844837	9.32527	9.12364	9.20671	9.28851	8.97266	9.00617	9.20571	9.25523	9.128	8.88114	9.11728	9.03326	7.82398	7.12205	7.30544	7.28091	7.90936	7.24452	7.6011	6.99199	8.53837	8.24157	7.92118	6.19132	5.49563	5.1207	5.92351	6.12643	6.05007	5.67324	5.38033	5.66887	6.09894	6.20065	5.72342	5.94535	5.81367	5.95547	5.62854	5.20769	5.74216	6.22181	6.26734	5.58287	6.18026	5.84808
Les.122.1.S1_at	Les.122.1	0.00125527	0.0154757	10.6344	10.1279	10.6724	11.1785	9.93065	9.76202	11.1607	8.66644	9.67456	11.4256	10.5891	11.195	12.0788	11.7621	11.3318	11.7386	12.4027	10.8705	12.0983	11.4116	12.1353	11.4833	12.2495	12.4932	11.8822	12.8907	13.2573	12.8672	12.5793	12.9554	13.1506	11.8928	11.949	11.6021	12.6062	12.1917	12.826	11.5044	13.4938	12.1004	11.8828	13.3111	13.0562	13.5571	11.8946	11.5198
Les.1225.1.S1_at	Les.1225.1	1.93715e-05	0.000637536	7.29777	7.75275	7.98183	7.68227	8.03655	7.89924	8.34621	8.33203	8.44493	8.48339	8.59426	8.69766	8.1316	7.82172	7.78757	8.13192	7.86167	7.86709	8.06565	7.75444	7.95197	7.75697	7.5652	7.68233	7.24121	6.75478	7.82878	7.29421	6.86679	6.91565	7.13495	7.64656	7.6938	7.60155	6.86495	6.9857	6.4576	7.1161	7.77813	8.06212	7.52975	6.95428	7.00513	6.81904	7.89161	7.83293
Les.1225.2.S1_at	Les.1225.2	0.00537169	0.0459999	6.16277	5.96103	6.45681	6.1417	6.21079	6.30431	6.64677	6.77944	7.07851	6.65048	7.13445	7.17676	6.49227	6.42303	6.24759	6.67842	6.48058	6.30545	6.3286	6.42141	6.20006	6.17467	6.35352	6.02374	6.01484	5.5038	6.17465	5.64686	5.36703	5.29757	5.60985	6.27067	6.17079	5.99593	5.2455	5.67193	5.37999	5.813	6.20404	6.39549	6.17719	5.66865	5.3528	5.27555	6.40585	6.33032
Les.1249.1.S1_at	Les.1249.1	0.00138158	0.0164581	10.5388	10.5523	10.6353	10.5576	10.4626	10.4334	10.6295	10.5765	10.4017	10.5219	10.4269	10.508	9.60287	9.50106	9.56805	9.45561	9.73063	9.2758	9.59912	9.51425	10.2347	9.79835	10.0297	8.75778	8.71973	8.76325	8.71677	8.92627	8.9362	8.73721	8.6916	8.81274	8.99098	8.75814	8.51775	8.55145	9.05028	8.69437	8.61942	8.32018	8.42328	8.65068	9.2321	9.12561	8.50005	8.49832
Les.1249.2.A1_at	Les.1249.2	1.78814e-07	1.3751e-05	12.0392	12.0423	12.0996	12.1656	11.971	12.0404	12.1508	11.9965	11.9019	12.0474	11.9577	12.0509	11.4446	11.1418	11.3267	11.262	11.3958	11.0375	11.3865	11.2027	11.8862	11.9214	11.6357	10.485	10.4129	10.2155	10.6013	10.7694	10.7046	10.2807	10.3446	10.372	10.4175	10.3645	10.3288	10.1567	10.6547	10.3079	10.2503	10.1031	9.94437	10.5275	10.7402	10.6301	10.3884	10.1293
Les.1277.2.A1_at	Les.1277.2	2.41995e-05	0.000760961	9.61925	9.59608	9.709	9.72583	9.69195	9.57138	9.79608	9.85962	9.89658	9.6454	9.70643	9.70994	9.78575	9.58347	9.53856	9.71322	9.52937	9.74867	9.77585	9.68196	9.57756	9.46023	9.44918	9.91497	9.65727	9.58102	9.93492	10.0265	10.0716	9.70727	9.55556	9.501	10.0946	10.0705	9.80181	9.73456	9.88861	9.87404	9.93375	9.77179	9.92788	9.99039	9.97091	9.78489	10.0076	9.9754
Les.1287.1.A1_at	Les.1287.1	0.000948429	0.012528	13.0972	13.1267	13.1207	13.1832	12.8714	13.024	13.1818	13.0107	12.9545	13.0728	12.9559	13.015	12.2588	11.9444	12.1582	12.2366	12.7698	11.7146	12.4212	12.386	13.4188	12.5354	12.8829	12.031	11.0794	12.3729	12.6213	12.5964	13.2663	12.2176	12.771	11.0031	11.4823	11.217	13.1368	12.7549	13.174	11.3164	12.8821	10.3191	10.8917	12.5136	13.1841	13.2579	11.361	10.936
Les.1287.2.S1_at	Les.1287.2	9.65595e-06	0.000357132	12.5807	12.4455	12.6997	12.5583	12.4323	12.4717	12.6637	12.3692	12.4278	12.311	12.3908	12.4343	11.1062	10.8101	11.1326	11.1708	12.1341	9.94541	11.4207	11.5143	13.0276	11.5561	12.3815	10.3946	9.55834	11.3053	11.8753	11.4764	12.4324	10.7442	12.0706	9.5283	9.62143	9.21242	11.7285	11.4262	12.723	9.27965	12.0711	8.45675	8.32956	10.888	13.0526	13.3935	9.06562	8.61315
Les.129.1.S1_at	Les.129.1	9.53674e-07	5.52775e-05	4.85362	4.56742	4.493	4.82776	4.58744	4.395	4.52071	4.38031	4.40802	4.8174	4.21407	4.38921	8.48801	9.16714	7.75145	9.51183	8.92608	10.4056	8.1981	8.46973	7.09817	9.6283	7.67453	9.46233	9.18877	7.06202	10.9731	10.3081	9.57137	8.97351	7.19655	9.46316	11.1777	11.2413	10.0889	8.31714	7.76605	9.967	12.2029	12.6132	11.842	10.1446	6.32331	7.64927	11.6276	11.6133
Les.1296.1.A1_at	Les.1296.1	6.02007e-06	0.000248712	8.37527	8.22027	8.0578	8.49063	7.74443	8.29408	7.78685	7.74669	7.46553	8.00509	7.94723	8.30816	8.30642	8.15485	7.84424	8.32077	8.12699	8.23723	7.82145	7.89191	7.89533	8.2302	7.80485	8.58541	8.42413	8.31774	8.82705	9.04196	8.57405	8.2322	8.24491	8.48592	8.82587	8.79703	8.71837	8.41917	8.05219	8.6519	9.40849	9.06284	9.15851	8.87532	8.25441	8.34278	9.03759	9.01188
Les.1297.1.S1_at	Les.1297.1	0.000572979	0.00859137	8.49299	8.30755	7.6093	8.34764	8.11816	8.56772	7.75987	7.79161	8.03268	8.16157	8.34941	8.24898	8.31638	8.58572	8.52267	8.39895	8.40717	8.81476	8.46086	8.31334	7.86694	8.23453	8.33225	8.2196	8.36661	8.48257	8.24004	8.30421	8.27021	8.35078	8.4613	8.41098	8.36204	8.41506	8.23079	8.53207	8.2907	8.30342	8.89843	8.94631	8.91471	8.47347	8.20476	8.29201	8.577	8.828
Les.1297.2.A1_at	Les.1297.2	0.000162363	0.00335392	8.42479	8.08015	7.76619	8.247	7.89533	8.21801	7.8534	7.70856	7.90309	7.80811	8.07349	8.05605	8.0945	7.76976	7.68962	8.16238	7.95937	8.10343	8.00364	7.8797	7.85054	7.9004	7.71179	7.74755	7.7129	7.49951	7.86524	7.9134	7.7284	7.82007	7.6102	7.4515	7.98493	7.96315	7.77873	7.77134	7.74226	7.80907	8.26103	8.08037	8.33941	7.8602	7.5041	7.68966	8.06325	8.22203
Les.130.1.S1_at	Les.130.1	0.00510573	0.0444079	11.1983	11.1918	10.5714	10.8214	10.9959	11.1646	10.6062	10.7036	10.8008	10.62	10.9008	10.6523	11.4234	11.7386	11.6441	11.5877	11.3511	11.6351	11.3942	11.8156	10.8947	11.4334	11.1269	11.3814	11.7092	11.1153	11.2502	11.2046	11.1685	11.4438	11.2556	11.591	11.552	11.4063	11.3186	11.2563	11.0306	11.4217	11.2795	11.5835	11.524	11.2536	10.8888	11.075	11.4457	11.477
Les.1314.1.S1_at	Les.1314.1	1.19209e-06	6.80808e-05	8.91943	8.92115	8.91703	8.47903	8.28416	8.13713	8.15818	8.46507	7.79349	7.60897	7.83286	7.6213	4.82023	4.28382	4.57256	4.24822	5.98602	4.78278	4.63506	4.49809	6.86356	5.65183	6.44189	4.32165	3.99381	4.69164	4.06668	4.74988	4.50865	3.87318	4.21992	3.97421	3.68193	4.15865	4.35367	5.98603	5.79026	5.68052	5.05841	4.79067	5.57652	4.63887	6.14305	5.47915	5.40695	5.46778
Les.1344.1.A1_at	Les.1344.1	0.00126219	0.0155117	4.36158	4.72058	4.33242	4.37484	4.55192	4.34707	4.54786	4.27208	4.23689	4.23469	4.31992	4.26443	5.6697	6.54425	5.42727	5.33597	5.59596	5.92544	5.50407	5.48848	4.22041	5.45599	4.12255	6.46535	6.82134	6.12728	6.14561	6.20549	5.20586	6.22391	5.07901	6.64812	6.97037	7.3046	5.9006	7.53781	5.18794	6.9824	6.79491	7.02212	7.95309	5.73666	5.1126	6.17095	6.76588	7.28555
Les.1389.1.S1_at	Les.1389.1	0	0	7.46961	7.14247	9.00865	7.55604	7.49187	7.50021	7.67981	7.3462	7.30994	7.52661	7.63362	7.66284	8.55318	8.57356	8.22236	10.1179	9.82589	8.19865	9.26908	8.99303	9.99861	9.08446	10.2242	9.66005	9.10912	9.95279	10.1502	10.402	10.4282	9.94118	10.2022	8.32108	9.10089	7.81166	9.864	10.0014	10.818	8.48897	10.6643	8.64493	8.02106	10.4101	11.181	11.3759	8.33353	7.76451
Les.1399.2.S1_at	Les.1399.2	5.96046e-08	4.92499e-06	8.42172	8.33359	8.21838	8.08279	8.5594	8.38737	8.1857	8.28039	8.53256	8.31076	8.51775	8.54012	7.04184	7.30722	7.69848	7.37782	7.09996	7.57411	7.47563	7.68878	6.49946	6.66817	6.67876	7.66182	7.91682	7.44532	7.67948	7.71376	7.80621	7.57401	7.59416	7.98057	8.14848	7.91683	7.44652	7.42321	7.32667	7.85899	7.68874	7.59125	7.82473	7.91523	7.69943	7.58917	7.82217	7.88501
Les.140.1.S1_at	Les.140.1	0.00115442	0.0145323	9.3064	9.10709	9.34039	9.41555	9.51403	9.36454	9.44212	9.2896	9.32551	9.14731	9.22503	9.16889	9.37778	9.26656	9.47288	10.1028	8.8491	9.21722	10.0374	9.5058	9.03838	8.9669	9.23203	9.03945	8.87193	8.16215	9.9619	9.71852	9.21444	8.55842	9.51364	8.9246	9.85519	9.36249	9.95362	8.10624	8.49799	8.98855	10.3849	10.5697	9.49118	10.0025	8.71735	8.55099	9.89684	9.9207
Les.1401.1.S1_at	Les.1401.1	4.78625e-05	0.0013136	9.98237	9.99782	10.2576	10.2389	10.0469	10.056	10.398	10.0744	10.1265	10.3899	10.2319	10.0731	10.565	10.2876	10.5842	10.6913	10.5505	10.2023	10.6773	10.0901	11.15	10.8922	10.9405	11.234	11.1074	11.6378	12.0498	12.1253	12.1934	11.3491	11.8796	10.8226	11.11	10.8569	11.8757	11.5799	12.0869	11.1227	11.6317	10.5858	10.8112	11.8684	12.3638	12.1948	10.8933	10.8696
Les.1401.2.S1_at	Les.1401.2	0.00374341	0.034904	8.81443	9.05401	9.05276	8.96779	9.05456	8.99642	9.40363	9.273	9.15461	9.37001	9.22905	9.0262	8.95426	9.39762	9.60071	9.2061	9.25226	9.26243	9.31288	9.02061	9.69513	9.29012	10.0401	9.72156	10.0363	10.6036	10.6933	10.3028	11.1053	9.89825	10.8908	9.89301	9.57397	9.24243	10.7858	10.3446	11.0118	9.81893	10.5487	9.53854	9.7501	10.6731	11.3205	11.109	9.73912	9.7536
Les.1401.3.S1_at	Les.1401.3	0.00156552	0.0181213	6.95393	7.08766	6.71991	6.906	6.86604	6.74317	7.3674	7.14057	6.72351	7.45	7.03515	6.83691	6.83433	7.20036	7.46538	6.99036	7.0443	7.26092	7.12237	6.93741	7.31162	7.04958	7.84185	7.71706	8.03934	8.58979	8.61349	7.97276	9.17287	7.7809	8.7467	7.83891	7.49821	7.35858	8.68632	8.42007	8.9576	7.74405	8.6249	7.51086	7.82917	8.89354	9.37819	9.10154	7.86222	7.68205
Les.1415.1.S1_at	Les.1415.1	2.40207e-05	0.000761504	7.44817	7.51591	7.5092	7.20044	7.59694	7.88552	7.68333	7.68838	7.67854	8.21631	8.32681	8.4002	7.81109	7.54888	7.604	7.65112	7.34779	7.75384	7.56736	7.4566	7.21326	7.49366	7.15636	7.60174	7.77848	7.55788	7.58488	7.54545	7.4081	7.70432	7.42176	7.76417	7.9268	7.81708	7.40536	7.73766	7.63418	7.98396	7.67964	7.97683	7.96284	7.69691	7.76543	7.85888	7.80782	7.95376
Les.1415.2.A1_at	Les.1415.2	0.00534314	0.0458565	6.47368	6.44751	6.32745	6.66785	6.48808	6.50535	6.52629	6.37921	6.57268	6.92414	6.95804	7.08058	6.40363	6.2399	6.22869	6.32788	6.38872	6.3778	6.1362	6.12796	6.15811	6.74784	6.40647	6.10481	6.35194	6.14218	6.11298	6.27597	6.29121	6.29968	6.19706	6.05077	6.04253	6.17881	5.87547	6.4438	6.07351	6.17395	6.25082	6.10706	6.18608	5.98144	6.28325	6.47625	6.32996	6.26992
Les.1426.1.S1_at	Les.1426.1	0.000230849	0.00439461	9.63902	9.61758	9.6962	9.57164	9.62	9.41899	9.8412	9.59028	9.27271	9.47578	9.31524	9.11469	8.11601	8.16121	8.31934	8.21935	7.49489	7.72045	8.31297	8.07784	7.42818	7.28709	7.51328	7.52112	7.61734	6.95312	7.69986	7.91676	7.27317	7.22274	7.73051	7.84021	7.89774	7.60706	7.40917	7.45453	7.48255	7.90752	7.78046	7.71698	7.75669	7.94055	7.80158	7.59488	7.91258	7.89579
Les.143.1.S1_at	Les.143.1	0.00168371	0.019119	12.076	11.9547	12.0589	11.8934	12.0591	11.8713	11.8797	11.9506	12.1044	11.9544	12.0342	12.0465	12.9886	13.1517	13.029	13.1536	12.5807	13.0038	12.9863	12.9316	12.2485	12.7201	12.3148	12.9956	13.2645	12.6854	12.9881	12.8441	12.6393	12.904	12.7241	13.1063	13.3047	13.1781	12.8616	12.8265	12.5802	13.134	13.1808	13.1992	13.1517	13.0593	12.5725	12.8812	13.0534	13.1987
Les.1430.1.A1_at	Les.1430.1	1.78814e-07	1.33543e-05	9.74767	9.86464	9.57546	9.43389	9.40451	9.65438	9.30066	9.36039	9.39663	9.29491	9.33507	9.38021	9.36915	9.34398	9.38544	9.20312	10.0358	9.71378	9.19819	9.47114	10.2138	9.8657	10.2119	9.46676	9.38448	10.0182	9.02753	9.76121	9.6058	9.63267	9.73937	9.27832	9.01735	9.20847	9.54689	9.98663	9.96888	9.53006	9.50147	9.2198	9.62873	9.37095	9.75934	9.61579	9.22089	9.26583
Les.1444.1.S1_at	Les.1444.1	7.39098e-06	0.000292886	9.57055	9.43364	9.65394	9.43234	9.85158	9.28029	9.7185	9.99383	10.0253	9.35014	9.66047	9.7078	10.0963	10.2104	10.1465	10.2828	9.81807	10.0332	10.4914	10.2439	9.78442	9.94102	9.82534	10.6143	10.6181	10.1259	10.8566	10.8188	10.7104	10.3801	10.3223	10.4656	10.7393	10.5912	10.5613	10.1013	10.4989	10.4761	10.7472	10.8109	10.3577	10.6528	10.5087	10.2605	10.5365	10.5533
Les.1444.2.A1_at	Les.1444.2	0.0045501	0.0405748	11.3755	11.1534	11.2807	11.2066	11.2666	11.0451	11.5231	11.6059	11.4858	11.4115	11.34	11.2847	11.5551	11.5004	11.4243	11.5998	11.2051	11.5103	11.7842	11.4932	11.3456	11.1462	11.2681	11.8689	11.8324	11.4416	11.9082	12.0812	11.9359	11.7314	11.7541	11.7732	12.017	11.9721	12.0725	11.6551	11.8667	12.0299	12.1857	11.9157	11.943	12.2677	11.9847	11.6866	12.0742	11.9636
Les.147.1.S1_at	Les.147.1	0.000913203	0.012187	14.3393	14.3065	14.3262	14.308	14.287	14.3297	14.3693	14.3081	14.3169	14.3455	14.316	14.3297	14.0691	13.9808	14.0557	13.8428	14.2797	13.9583	14.0254	13.9445	14.2282	14.1547	14.3058	12.5798	12.3927	13.0599	11.9613	12.7219	12.9643	12.5061	13.1359	12.5134	12.4283	12.1165	12.1925	12.3848	12.7881	11.714	11.5934	11.1611	10.3834	11.7637	12.8889	13.0009	11.674	11.6382
Les.1481.1.A1_at	Les.1481.1	2.98023e-07	2.04845e-05	7.36765	7.09192	7.33708	7.76959	7.14323	7.3715	7.77179	7.31395	7.91177	7.16071	7.16207	7.06397	5.40617	5.05324	5.17433	5.69949	4.8154	6.67375	5.74314	5.32652	5.19761	5.22427	4.8799	4.68474	4.87372	4.60276	4.98385	5.10631	4.66259	4.71859	4.36335	4.76108	5.23682	5.31287	4.93605	5.07783	4.90108	5.33662	5.5674	5.7831	5.62673	5.5213	4.85436	5.12539	5.9996	5.69903
Les.1514.1.S1_at	Les.1514.1	3.25441e-05	0.000961104	11.4786	11.6266	11.7005	11.7205	11.6897	11.7101	11.6491	11.7516	11.5776	11.7304	11.6236	11.591	11.1491	10.8816	11.1824	10.9868	11.6116	10.79	11.157	11.1549	11.9686	11.408	11.8901	10.8477	10.6058	11.0033	11.1252	11.0278	11.2156	10.682	11.3086	10.781	10.6906	10.3955	11.0672	10.8168	11.4343	10.4525	10.8065	10.3751	10.0069	10.8353	11.4228	11.267	10.5419	10.1932
Les.1518.1.S1_at	Les.1518.1	0.000231504	0.00439632	4.21402	4.09832	4.11035	4.36685	4.36368	4.14232	4.31325	4.25128	4.4208	4.41831	3.96011	4.4266	5.10368	4.76562	4.71801	5.33846	5.67939	4.85211	5.01693	4.95465	5.9031	5.64504	5.52295	5.78022	5.00548	5.24952	5.99589	5.1968	5.69303	5.50175	5.34397	5.10025	5.48723	5.47186	5.04319	4.69608	4.77075	4.41795	4.48932	4.28115	4.41896	4.60866	4.47382	4.60474	4.45244	4.34986
Les.1558.1.S1_at	Les.1558.1	0.00541216	0.046143	8.91558	8.93927	8.7083	9.37023	9.17844	9.40944	9.11468	9.05189	9.18656	9.03228	9.45573	9.38814	9.19671	9.17018	9.1585	9.46896	9.0839	9.26737	9.35822	9.17685	8.69146	9.08606	8.67139	9.00496	8.96827	8.74338	8.96715	8.82094	8.62571	9.13669	8.6883	8.88315	9.29441	9.04035	8.64687	8.89733	8.72133	8.85692	9.18924	9.36712	9.18932	9.06761	8.44369	8.66367	9.2192	9.43913
Les.1558.2.A1_at	Les.1558.2	0.00427604	0.038529	8.54264	8.25502	8.2459	8.90267	8.74594	8.76774	8.74862	8.58076	8.74825	8.77409	8.9643	8.76104	8.88458	8.78652	8.57842	9.09034	8.68922	8.92872	8.75498	8.83131	8.201	8.57222	8.20477	8.59178	8.54832	7.97023	8.55551	8.59896	8.1958	8.56916	8.07482	8.34879	8.78677	8.84821	8.2078	8.14298	8.01859	8.44037	8.61953	8.90022	8.70694	8.59489	7.52794	8.00064	8.65489	8.77325
Les.1569.1.S1_at	Les.1569.1	1.84774e-06	9.82974e-05	9.01842	9.1291	9.16067	8.83229	9.06466	9.05373	8.87987	9.14333	8.99545	9.17084	8.96752	8.94949	8.55551	8.33461	8.38866	8.44715	8.92283	8.44053	8.37963	8.36748	9.12773	8.68995	8.85782	8.16372	8.1801	8.41609	7.83653	8.1364	7.84275	8.19395	8.37055	8.2459	7.91762	7.85972	7.69093	8.31935	8.26627	8.08976	7.80738	7.84393	8.00438	7.84134	8.02244	8.20734	8.00863	7.94004
Les.1606.1.S1_at	Les.1606.1	0.00200248	0.0217833	9.95191	10.0689	10.091	11.3654	10.6357	10.9005	10.3323	10.3003	10.9567	11.3206	11.2745	11.2676	10.6311	11.1123	10.8173	10.6151	10.9358	11.0606	10.884	11.0769	9.95525	10.9899	10.3488	11.5382	12.0127	11.9915	11.3462	11.6144	11.1448	12.1325	11.0818	11.4408	11.6594	11.8347	11.4053	11.5684	11.105	11.6621	11.8512	12.1979	11.9765	11.3779	10.5875	11.0978	11.501	11.9691
Les.1609.1.S1_at	Les.1609.1	5.42402e-06	0.000231475	7.52122	7.13685	7.10884	7.74534	8.82387	7.90759	9.02885	8.47841	8.23905	8.06503	8.05635	7.58903	6.72011	7.39388	7.29067	7.11841	6.84356	7.45048	7.20394	7.28713	5.56809	6.81657	6.30205	6.38907	6.98636	6.05186	6.49954	6.29831	6.13263	6.4128	6.00774	6.88625	7.16474	6.9882	6.04725	6.10181	5.8676	6.39177	6.8349	7.34472	6.96793	5.97797	5.72436	6.01389	6.79236	7.18294
Les.1609.2.A1_at	Les.1609.2	1.37091e-06	7.6056e-05	9.57602	9.15013	9.38736	9.60476	10.4596	9.69756	10.7683	10.3147	10.0952	9.78068	9.99617	9.232	8.86428	9.18658	9.13272	9.33743	8.46298	9.47675	9.22733	9.18056	7.79471	8.70651	7.99093	8.5669	8.88602	7.95305	8.49704	8.62271	8.12308	8.51992	7.87587	8.57362	9.14753	9.31199	8.07213	8.00295	7.8722	8.43994	8.77514	9.27332	9.08637	8.29765	7.74254	7.97693	8.94923	9.15647
Les.1610.1.S1_at	Les.1610.1	3.59416e-05	0.00104164	10.4188	10.7074	10.3051	11.3188	11.7213	11.1691	10.9857	11.2425	11.4813	11.3297	11.5012	10.7194	13.0014	13.0379	13.2158	13.2038	12.1539	12.7584	13.0679	12.9206	10.7167	12.1406	11.7637	13.2298	13.268	12.5605	13.3135	13.2068	13.0143	13.2931	13.1759	13.2418	13.3926	13.2451	12.6581	12.7426	12.825	12.8706	13.0357	12.9313	13.1176	13.3029	12.7806	12.8851	13.0105	13.1218
Les.1655.1.A1_at	Les.1655.1	0.00338155	0.0325459	7.781	7.502	8.13508	8.16654	7.71959	7.54543	7.88132	8.03626	7.60923	7.21774	7.67845	7.22228	6.32399	6.07504	6.275	6.54424	6.59912	5.3209	6.66448	6.25363	6.80767	6.5568	6.76005	5.78962	5.1714	5.41503	6.45322	6.5498	6.43693	5.74981	6.51953	5.55154	5.66363	5.01396	5.99804	5.57317	6.13002	5.20123	5.94373	4.81008	4.67431	5.79125	6.41545	6.20124	5.53362	5.15771
Les.1665.1.S1_at	Les.1665.1	0.000892937	0.0119577	4.82044	5.08864	5.02595	5.24613	4.91729	5.1234	5.22434	5.20735	4.85061	5.53789	5.12228	4.93203	5.59306	5.08035	5.05591	5.4339	5.07644	4.7806	5.06802	4.57512	6.10891	4.55855	5.10493	5.18045	4.97095	5.2792	6.02118	5.18565	6.11356	5.03375	5.48136	4.87621	4.96697	4.6765	5.57424	5.65193	6.85208	5.11173	6.74896	5.44002	5.34841	5.74505	7.51798	8.21724	5.15593	5.16992
Les.1669.2.A1_at	Les.1669.2	0.0059405	0.0494532	10.9077	10.7659	10.8026	10.8914	10.8052	10.9183	10.8697	10.6377	10.7764	10.9435	10.8982	10.81	11.3239	11.4023	11.2526	11.2886	11.0741	11.5356	11.1194	11.1095	10.5419	11.1592	10.5655	11.0193	11.1712	10.5863	10.7708	10.972	10.5029	10.7959	10.4916	10.9964	11.2816	11.4039	10.7961	10.7735	10.3187	11.1424	11.1636	11.1837	11.3548	10.9818	10.3221	10.6918	11.0643	11.3834
Les.1675.1.S2_at	Les.1675.1	0.00167304	0.0190815	10.7788	10.7949	10.9244	10.7543	10.6932	10.9107	11.0123	10.612	10.7381	10.8599	10.7939	10.8823	10.7332	10.8947	10.726	10.6337	11.1191	10.8734	10.8027	10.7399	11.4999	10.8412	11.3426	10.9641	11.0363	11.4153	10.9742	11.1159	11.1976	11.1877	11.3763	10.8375	10.6483	10.7723	11.2391	11.3201	11.6189	10.9482	11.1889	10.9267	10.803	11.1903	11.627	11.6817	10.8391	10.8478
Les.168.1.S1_at	Les.168.1	0.00351399	0.0334066	11.9593	11.9325	11.9263	11.9784	12.115	11.7623	12.161	12.0901	12.1894	11.9754	11.9715	11.9969	12.1979	12.393	12.2558	12.3454	12.0893	12.3351	12.4386	12.4209	12.2147	12.2141	12.0708	12.696	12.7859	12.6249	12.6866	12.8971	12.802	12.691	12.6742	12.6992	12.791	12.7511	12.8773	12.8655	12.705	12.7972	12.9221	12.7566	12.8923	12.939	12.8273	12.7066	12.8747	12.9028
Les.170.1.S1_at	Les.170.1	2.50936e-05	0.000779607	11.186	11.0248	11.5089	11.3189	11.2956	11.3141	11.7016	11.4483	11.3983	11.4337	11.5952	11.3369	10.6747	10.3806	10.4288	10.4559	10.6037	9.93339	10.922	10.2912	11.1346	10.7008	10.9801	9.89176	9.23757	9.91677	10.0219	9.84303	9.9808	9.6351	9.90937	9.1382	9.59868	9.1897	9.51524	9.49978	10.3085	9.27473	9.55287	9.16024	8.6283	9.85804	10.5126	10.5938	9.31847	8.79523
Les.172.2.S1_a_at	Les.172.2	1.82986e-05	0.00060998	9.29588	9.12322	9.66974	9.47007	9.35322	9.40419	9.45613	9.21608	9.51426	9.46634	9.17396	9.51925	8.85985	9.13535	9.41364	9.08451	9.8885	9.21802	9.09014	9.28562	10.3559	9.66508	9.94624	9.76678	9.91472	10.5249	10.1423	10.1835	10.4169	10.5038	10.4105	9.51182	9.25777	9.18441	10.2602	9.98246	11.0679	9.55989	10.2333	9.65999	9.64695	10.0571	10.5789	10.7498	9.24889	9.3603
Les.1721.1.A1_at	Les.1721.1	0.00195831	0.0214228	10.9891	10.8307	11.293	10.9658	10.741	10.7045	10.8298	10.921	11.5625	11.1544	10.964	10.9402	10.5563	10.2107	10.2097	10.0748	10.022	10.5277	10.2034	10.5661	10.7573	10.1603	10.3864	9.46724	9.42675	9.5339	9.45341	10.0316	9.60496	9.17147	9.19085	9.12483	9.81585	9.9251	9.90434	8.85137	9.30139	9.25048	9.25639	8.81734	8.79009	9.45841	9.37003	9.22253	9.1232	9.16048
Les.1721.2.S1_at	Les.1721.2	2.78354e-05	0.000844521	9.85606	9.40758	9.9315	9.72382	9.38506	9.41127	9.79494	9.58053	10.1223	10.0241	9.69282	9.77062	9.60351	8.95753	9.06795	8.94764	9.05393	9.29319	9.1136	9.45321	9.54416	9.24365	9.14112	8.65335	8.56429	8.57197	8.64443	9.15105	8.90107	8.32522	7.86315	7.93277	8.89282	9.07075	8.66836	7.63468	8.25223	8.1793	8.12247	7.34258	7.42245	8.29732	8.08185	8.11692	7.69597	7.87755
Les.1724.3.A1_at	Les.1724.3	0.00117683	0.0147665	10.9584	10.6584	10.9179	11.093	10.4928	10.5047	11.0263	10.6535	10.7433	10.8797	10.801	10.68	11.1987	10.8165	10.9222	10.8998	10.7292	10.9207	11.1465	10.9575	11.1435	10.9902	10.5547	11.0768	10.4095	10.0979	11.3345	11.1951	11.3707	10.6475	10.879	10.6153	11.4918	11.4316	11.5121	10.1524	10.7756	10.8244	11.532	11.3417	10.7256	11.4213	10.5322	10.5473	11.1613	11.2063
Les.1733.1.A1_at	Les.1733.1	0.0058434	0.0488018	7.87396	7.85432	8.17718	8.32731	8.57142	8.1009	8.75011	8.28144	8.41474	8.89303	8.44128	8.56995	7.99358	8.16874	7.90228	7.98815	7.81027	8.24066	7.92239	8.13032	7.32508	7.62233	7.23691	8.47851	8.55663	8.61183	8.10702	8.3227	8.29703	8.62211	8.24746	8.46485	8.6094	8.67747	8.17251	8.32848	8.02692	8.38604	8.07594	8.42067	8.56774	8.29592	8.08988	8.077	8.27173	8.35352
Les.178.1.S1_at	Les.178.1	1.19209e-07	9.54535e-06	9.21871	9.18483	9.31745	9.10435	9.18941	9.05437	9.08515	9.56658	9.4392	9.03228	9.69083	9.19735	9.09848	8.79209	9.01241	9.28586	8.71665	8.91423	9.34805	9.18028	9.02044	8.76295	8.83568	8.41803	8.1937	7.51696	8.6447	8.51146	8.00752	8.02406	8.18195	8.2952	8.86488	8.85708	8.06158	7.58973	7.24258	8.44971	9.57217	9.67648	9.03133	8.50962	7.76202	7.68419	9.2966	9.1832
Les.1780.1.A1_at	Les.1780.1	0.00380778	0.0352084	9.90717	9.83157	9.96353	9.98634	9.74483	9.8795	9.84146	9.87383	9.84227	9.78596	9.8406	9.86445	10.1528	10.1801	10.0642	10.1275	9.99128	9.95276	10.1774	10.1297	10.1077	10.0122	10.065	10.2257	10.3512	10.2183	10.5613	10.8283	10.6568	10.2919	10.5368	10.2896	10.5958	10.4039	10.4627	10.2799	10.6144	10.4527	10.4561	10.0933	10.2547	10.6694	10.862	10.7661	10.2265	10.4271
Les.1787.1.A1_at	Les.1787.1	0.00121742	0.015105	10.1375	9.53216	10.246	10.4116	10.1084	10.173	10.6615	10.4794	10.7112	10.6824	10.5353	10.354	10.1395	10.1524	10.1914	10.4089	8.95904	9.50921	10.4654	10.1909	8.58305	9.31555	8.74302	9.50874	9.20463	7.53523	8.91541	8.89464	8.16941	8.43254	8.48296	9.19604	9.38929	9.28371	7.99399	8.13211	8.17438	9.12416	8.61949	9.13522	8.58339	9.43269	8.03556	8.33043	8.84231	9.27075
Les.1796.1.S1_at	Les.1796.1	0.000874162	0.0117671	10.205	10.2095	10.2947	10.2575	10.5316	10.3323	10.6134	10.5951	10.4146	10.4206	10.3887	10.4384	10.6317	10.6555	10.6682	10.7885	10.5094	10.4528	10.7122	10.4932	10.603	10.3447	10.5319	10.1839	10.3014	10.4954	10.3677	10.1655	10.4896	10.2132	10.4902	10.276	10.218	10.0152	10.2038	10.48	10.7962	10.0763	10.4155	10.0081	9.99931	10.2762	10.8958	11.0423	10.037	10.0419
Les.18.1.S1_at	Les.18.1	0.00592989	0.0494178	6.6171	6.42118	6.31065	6.10125	6.42395	6.29714	6.48245	6.33855	6.51811	6.38082	6.43781	6.36168	6.32765	6.27958	6.37222	5.98398	6.32765	6.13211	6.51028	5.89274	6.33083	6.22745	6.19203	6.56263	6.24102	5.90354	6.55885	6.31465	6.37233	6.34087	6.27576	6.03523	6.43274	6.03542	6.59354	6.44016	6.67884	6.37349	6.57018	6.43137	6.44875	6.5271	6.98681	7.33682	6.18957	6.09354
Les.1819.1.A1_a_at	Les.1819.1	6.97374e-06	0.000280648	10.7158	10.6926	10.7141	10.6556	10.9772	10.8829	10.7026	11.3059	11.0695	10.7346	10.967	10.66	9.91441	10.0637	9.95697	9.88207	10.1788	10.1782	9.67525	10.1832	9.65517	9.86517	9.81347	9.62491	10.109	9.79454	9.81365	10.077	9.48344	9.66394	9.38287	10.3439	10.0196	10.1991	9.64091	9.94874	9.24241	10.2781	10.5971	10.8825	10.5642	9.39648	9.34992	9.64666	10.6025	10.6244
Les.1819.1.A1_at	Les.1819.1	0.00184661	0.0206072	9.53177	9.48761	9.59681	9.54303	9.86053	9.74279	9.53943	9.92572	9.93198	9.57117	9.87567	9.47728	8.81895	8.91585	8.92941	8.83772	9.12647	9.00326	8.54577	9.14006	8.3994	9.29901	8.76895	8.56011	8.88778	8.63624	8.71442	8.82593	8.42662	8.44158	8.16564	9.20415	8.94634	9.11452	8.53375	8.7919	8.127	9.13292	9.3831	9.69936	9.34968	7.97879	7.98982	8.43742	9.27807	9.22346
Les.1830.1.A1_at	Les.1830.1	0.000111043	0.00244327	10.9632	11.1065	10.9535	11.0381	10.8689	11.0672	10.9998	10.9735	10.9652	11.1652	11.0243	11.0528	9.88717	9.65618	9.72188	9.54267	10.4079	9.80378	9.86457	9.70824	11.0094	10.1354	10.7636	10.4235	9.97382	10.8456	9.81133	10.3519	10.5636	10.3743	10.2825	9.99809	9.99262	10.0749	10.3399	10.8592	10.8678	10.2567	10.11	9.3619	10.0504	10.1367	10.9614	10.727	10.1923	10.1412
Les.184.1.S1_at	Les.184.1	0.00396872	0.0364362	12.5647	12.4906	12.64	12.6608	12.4605	12.4725	12.6529	12.2699	12.3576	12.5619	12.4563	12.5615	12.4687	12.5687	12.5893	12.5269	12.8995	12.4619	12.6019	12.5785	12.9762	12.7009	12.84	12.9595	12.8432	13.1342	12.8748	12.8896	12.9744	13.1098	13.0006	12.8077	12.611	12.7596	12.8689	13.1606	13.4311	12.6983	12.8648	12.7072	12.809	12.8677	13.0467	13.1178	12.6868	12.6246
Les.1841.1.S1_at	Les.1841.1	0	0	9.06517	8.09926	7.13033	7.30349	7.67842	8.1535	7.48569	7.45936	7.16508	6.87627	7.53327	7.69816	7.18128	7.07754	6.91482	7.45372	7.68128	7.18432	7.86032	7.32252	8.29967	7.64305	7.88137	7.03624	6.99343	6.93075	8.18924	8.15571	8.01118	7.39664	7.84287	6.9822	7.90063	8.20725	7.9566	6.96317	7.32995	7.00579	8.92042	8.71287	8.43556	7.32898	7.19211	7.06093	8.64321	8.2993
Les.1847.1.A1_at	Les.1847.1	0.000626683	0.00921865	8.97153	8.80848	8.97209	8.99765	8.8454	9.02112	9.2767	8.89568	8.76532	8.9658	8.70764	8.94379	9.30231	8.96273	9.28077	9.33463	9.59334	8.73215	9.37162	9.06763	10.0028	9.16875	9.92869	9.27483	9.01697	9.41762	9.7872	9.7391	9.87183	9.40688	9.97143	9.06183	9.28316	8.64372	9.35158	9.37602	9.94661	9.02623	9.4703	8.72752	8.45478	9.63159	10.0501	9.89369	8.93925	8.68988
Les.1850.1.A1_at	Les.1850.1	0.000781298	0.0107595	10.7871	10.665	10.7409	10.7904	10.955	10.7041	10.9398	11.5161	10.8759	10.6933	10.7313	10.3789	9.31112	8.96965	8.60283	8.55137	10.1791	9.03074	8.66998	8.96157	10.4953	10.9591	10.7394	9.40077	8.59718	10.4472	6.76164	8.91595	8.6036	9.80146	9.27999	8.1041	7.65388	8.38169	9.15223	9.4969	9.42799	8.20371	7.3522	7.00947	8.03384	6.96617	8.58132	8.68204	7.64307	8.35717
Les.1859.2.S1_at	Les.1859.2	0.00350159	0.0333295	9.12791	8.683	8.56336	9.45438	8.74988	8.93532	9.27284	8.75708	8.67883	8.9943	9.1817	9.09348	9.4048	9.13321	9.3503	9.51113	8.11755	8.44042	9.97129	9.14213	8.33827	8.65238	8.98893	9.28617	9.2875	9.12099	10.2951	9.80938	9.67965	9.96025	9.92108	9.19837	9.68949	9.36364	9.72753	8.82137	9.78731	9.20295	10.67	9.653	9.36793	10.2769	9.51901	10.1162	9.13272	9.22562
[truncated: 857 more rows]
[truncated: 1 more columns]

## Sheet: Table S3C
Table 3C. Summary expression data for the non-redundant list of genes significantly affected by Botrytis cinerea infection in control and/or BABA-primed plants.
			Replicate means (log2 expression signal)																log2 Fold-change value (Botrytis/mock)
[truncated: 1,193 more rows]
